# Supplementary material for: CFSAN SNP Pipeline 2 (CSP2): a pipeline for fast and accurate SNP distance estimation from bacterial genome assemblies
Source: PeerJ Comput Sci. 2025 Jul 9;11:e2878. doi: 10.7717/peerj-cs.2878 (PMC12453658; doi:10.7717/peerj-cs.2878)
Supplement: Supplemental Information 4 — Table S1: Run parameters for CSP2 Table S2: Isolate counts for each NCBI SNP Cluster Table S3: Reference screening results for mutated Salmonella Agona genomes Table S4: Assembly statistics for SPAdes and SKESA assemblies Table S5: Reference screening results for SPAdes and SKESA simulated mutant assemblies Table S6: SNP Pipeline results for SPAdes and SKESA simulated mutant assemblies Table S7: Assembly statistics, CSP1 read mapping statistics, and CSP2 coverage statistics Table S8: Slope, correlation, and mean SNP differences for each cluster and method comparison Table S9: Mean SNP differences and 95% confidence intervals for each isolate and method comparison for contig count inliers and outliers. [file peerj-cs-11-2878-s004.xlsx]

## Sheet: Table S1
	Run parameters for CSP2
Parameter (--param)	Parameter_Type	Description	Default_Value
runmode	Arguments	assemble/align/screen/snp	""
n_ref	Arguments	If CSP2 is choosing references, how many?	1
ref_id	Arguments	Comma separated list of Isolate IDs to use as references	""
exclude	Arguments	Comma separated list of Isolate IDs to ignore	""
fasta	Sample Data	Path to query assemblies (Directory or list)	""
ref_fasta	Sample Data	Path to reference assemblies (Directory or list)	""
reads	Sample Data	Path to query reads (Directory)	""
ref_reads	Sample Data	Path to reference reads (Directory)	""
snpdiffs	Sample Data	Path to pre-generated snpdiffs files (Directory or list)	""
readext	Formats	Query read extension	fastq.gz
forward	Formats	Query forward suffix	_1.fastq.gz
reverse	Formats	Query reverse suffix	_2.fastq.gz
ref_readext	Formats	Reference read extension	fastq.gz
ref_forward	Formats	Reference forward suffix	_1.fastq.gz
ref_reverse	Formats	Reference reverse suffix	_2.fastq.gz
trim_name	Formats	Remove regular text from assembly or read names (e.g., "_contigs_skesa")	""
outroot	Output	Root directory for output	Current Directory
out	Output	Name of output directory	outroot/CSP2_${new java.util.Date().getTime()}
min_cov	QC Threshold	Minimum reference genome coverage for full query processing	85
min_iden	QC Threshold	Minimum alignment percent identity to consider for SNPs	99
min_len	QC Threshold	Minimum alignment length to consider for SNPs	500
dwin	QC Threshold	Comma separated list of window sizes (Set to 0 to disable density filters)	1000,125,15
wsnps	QC Threshold	Max SNP counts per density window	3,2,1
ref_edge	QC Threshold	Minimum SNP distance from reference contig edge	350
query_edge	QC Threshold	Minimum SNP distance from query contig edge (Can be rescued in SNP Pipeline mode)	350
max_missing	QC Threshold	Maximum allowable percent of isolates with missing data for SNP calling (SNP Pipeline mode only)	50
rescue	QC Threshold	If --rescue is set, edge filtered SNPs are rescued if found more centrally in another query assembly	Unset (do not edge rescue)
cores	Environment	Number of available processors per node	1
tmp_dir	Environment	Path to a temporary storage directory	Default system TMPDIR
bbtools_module	Environment	If using an HPC with modules, BBTools module name	""
bedtools_module	Environment	If using an HPC with modules, BEDTools module name	""
mummer_module	Environment	If using an HPC with modules, MUMmer module name	""
python_module	Environment	If using an HPC with modules, Python3 module name	""
refchooser_module	Environment	If using an HPC with modules, RefChooser module name	""
skesa_module	Environment	If using an HPC with modules, SKESA module name	""

## Sheet: Table S2
	Isolate counts for each NCBI
Species	NCBI_SNP_Cluster	Isolates_Pass	Isolates_Fail
E. coli	PDS000000709.70	69	2
E. coli	PDS000000712.113	111	1
E. coli	PDS000000812.66	81	0
E. coli	PDS000001063.100	103	1
E. coli	PDS000003443.105	107	3
E. coli	PDS000003657.110	100	7
E. coli	PDS000004313.94	121	2
E. coli	PDS000004902.66	75	9
E. coli	PDS000006247.21	65	0
E. coli	PDS000008627.62	82	17
E. coli	PDS000014781.44	75	8
E. coli	PDS000015906.68	73	1
E. coli	PDS000016929.61	58	3
E. coli	PDS000019298.60	54	3
E. coli	PDS000020148.18	60	1
E. coli	PDS000033695.60	94	1
E. coli	PDS000034262.79	99	0
E. coli	PDS000034684.64	91	8
E. coli	PDS000034895.32	49	3
E. coli	PDS000034922.19	50	1
E. coli	PDS000034994.38	50	1
E. coli	PDS000035041.62	112	0
E. coli	PDS000035111.83	96	8
E. coli	PDS000035212.40	48	9
E. coli	PDS000035426.65	69	0
E. coli	PDS000035737.71	144	5
E. coli	PDS000037269.53	60	1
E. coli	PDS000046770.28	51	3
E. coli	PDS000047062.10	57	0
E. coli	PDS000047857.31	51	0
E. coli	PDS000052522.61	133	3
E. coli	PDS000053788.25	67	0
E. coli	PDS000057981.20	59	2
E. coli	PDS000061297.20	63	8
E. coli	PDS000061899.27	56	3
E. coli	PDS000061924.6	100	0
E. coli	PDS000062070.17	59	4
E. coli	PDS000062095.20	52	2
E. coli	PDS000062098.21	55	2
E. coli	PDS000070064.71	75	0
E. coli	PDS000071644.20	97	1
E. coli	PDS000072635.46	53	0
E. coli	PDS000080828.3	84	0
E. coli	PDS000090208.57	81	1
E. coli	PDS000120861.4	49	18
E. coli	PDS000122693.8	63	63
E. coli	PDS000122726.2	66	42
E. coli	PDS000135501.13	61	0
E. coli	PDS000154682.4	87	0
E. coli	PDS000164845.1	55	1
Listeria	PDS000000260.40	47	3
Listeria	PDS000000314.82	65	3
Listeria	PDS000000319.62	97	5
Listeria	PDS000000337.60	61	2
Listeria	PDS000001093.40	50	6
Listeria	PDS000003170.92	115	7
Listeria	PDS000003173.80	85	8
Listeria	PDS000003174.64	61	10
Listeria	PDS000003223.15	57	1
Listeria	PDS000003235.48	63	14
Listeria	PDS000003244.74	104	13
Listeria	PDS000003294.18	102	10
Listeria	PDS000003348.63	41	9
Listeria	PDS000005514.51	59	10
Listeria	PDS000006279.32	55	10
Listeria	PDS000006328.31	78	12
Listeria	PDS000024196.42	136	8
Listeria	PDS000024361.55	64	10
Listeria	PDS000024413.26	44	12
Listeria	PDS000024430.54	130	8
Listeria	PDS000024493.15	56	10
Listeria	PDS000024618.44	63	5
Listeria	PDS000024641.33	111	32
Listeria	PDS000024684.43	73	9
Listeria	PDS000024685.61	95	11
Listeria	PDS000024695.37	63	7
Listeria	PDS000024823.25	77	4
Listeria	PDS000024918.32	51	4
Listeria	PDS000025037.54	112	6
Listeria	PDS000025067.48	119	14
Listeria	PDS000025113.14	87	8
Listeria	PDS000025156.39	54	7
Listeria	PDS000025160.12	65	2
Listeria	PDS000025192.22	54	8
Listeria	PDS000025219.36	61	8
Listeria	PDS000025362.28	53	4
Listeria	PDS000025453.31	47	3
Listeria	PDS000025505.28	44	7
Listeria	PDS000025513.43	65	6
Listeria	PDS000036407.11	63	3
Listeria	PDS000036641.48	89	13
Listeria	PDS000036645.52	80	4
Listeria	PDS000039359.15	46	4
Listeria	PDS000039458.16	53	0
Listeria	PDS000041936.38	49	16
Listeria	PDS000043450.28	48	10
Listeria	PDS000044696.11	31	21
Listeria	PDS000060146.5	52	1
Listeria	PDS000065444.21	49	48
Listeria	PDS000161253.2	34	16
Salmonella	PDS000001789.64	80	16
Salmonella	PDS000002110.16	79	7
Salmonella	PDS000002141.100	115	1
Salmonella	PDS000002229.46	49	4
Salmonella	PDS000002233.82	117	12
Salmonella	PDS000003757.51	90	11
Salmonella	PDS000003971.70	68	6
Salmonella	PDS000003977.69	83	4
Salmonella	PDS000004194.75	77	6
Salmonella	PDS000004394.125	141	3
Salmonella	PDS000005446.101	94	3
Salmonella	PDS000007398.27	57	1
Salmonella	PDS000010248.67	68	4
Salmonella	PDS000010686.61	76	3
Salmonella	PDS000015877.72	86	0
Salmonella	PDS000016766.28	71	6
Salmonella	PDS000026579.57	105	4
Salmonella	PDS000026852.115	141	4
Salmonella	PDS000026947.26	77	5
Salmonella	PDS000027914.55	62	3
Salmonella	PDS000027980.42	51	0
Salmonella	PDS000028093.75	98	8
Salmonella	PDS000028443.79	93	3
Salmonella	PDS000028499.95	90	55
Salmonella	PDS000028568.51	101	5
Salmonella	PDS000028885.6	52	3
Salmonella	PDS000028904.81	98	5
Salmonella	PDS000028937.78	95	7
Salmonella	PDS000029136.52	54	2
Salmonella	PDS000029648.36	54	0
Salmonella	PDS000030124.88	69	44
Salmonella	PDS000030230.46	61	0
Salmonella	PDS000030487.66	66	3
Salmonella	PDS000031836.32	48	9
Salmonella	PDS000032619.14	76	3
Salmonella	PDS000032708.28	60	6
Salmonella	PDS000032718.53	87	12
Salmonella	PDS000037294.39	61	3
Salmonella	PDS000040205.56	67	8
Salmonella	PDS000042247.13	74	8
Salmonella	PDS000042355.39	51	2
Salmonella	PDS000042483.31	63	14
Salmonella	PDS000046344.65	81	6
Salmonella	PDS000047893.30	53	2
Salmonella	PDS000052571.23	52	2
Salmonella	PDS000060040.17	90	2
Salmonella	PDS000064974.34	86	9
Salmonella	PDS000072598.44	113	1
Salmonella	PDS000091082.2	52	1
Salmonella	PDS000102184.31	98	10

## Sheet: Table S3
	Reference screening results for mutated Salmonella Agona genomes
Isolate_ID	CSP2_Screen_SNPs	Query_Percent_Aligned	Reference_Percent_Aligned	Query_Contigs	Query_Bases	Reference_Contigs	Reference_Bases	Raw_SNPs	Purged_Length	Purged_Identity	Purged_LengthIdentity	Purged_Invalid	Purged_Indel	Purged_Duplicate	Purged_Het	Purged_Density	Filtered_Query_Edge	Filtered_Ref_Edge	Filtered_Both_Edge	Kmer_Similarity	Shared_Kmers	Query_Unique_Kmers	Reference_Unique_Kmers	MUMmer_gSNPs	MUMmer_gIndels
Mut_0	300	100	100	1	4798660	1	4798660	300	0	0	0	0	40	0	0	0	0	0	0	99.56	4721931	10477	10339	298	40
Mut_1	300	100	100	1	4798660	1	4798660	300	0	0	0	0	40	0	0	0	0	0	0	99.56	4721972	10494	10298	300	40
Mut_10	298	100	100	1	4798660	1	4798660	300	0	0	0	0	40	0	0	2	0	0	0	99.57	4722226	10474	10044	298	40
Mut_11	294	100	100	1	4798660	1	4798660	300	0	0	0	0	40	0	0	6	0	0	0	99.56	4722069	10439	10201	296	40
Mut_12	300	100	100	1	4798660	1	4798660	300	0	0	0	0	40	0	0	0	0	0	0	99.56	4721832	10498	10438	300	40
Mut_13	300	100	100	1	4798660	1	4798660	300	0	0	0	0	40	0	0	0	0	0	0	99.56	4721889	10492	10381	300	40
Mut_14	300	100	100	1	4798660	1	4798660	300	0	0	0	0	40	0	0	0	0	0	0	99.56	4722037	10492	10233	300	40
Mut_15	300	100	100	1	4798660	1	4798660	300	0	0	0	0	40	0	0	0	0	0	0	99.56	4722098	10490	10172	300	40
Mut_16	300	100	100	1	4798660	1	4798660	300	0	0	0	0	40	0	0	0	0	0	0	99.56	4722079	10488	10191	300	40
Mut_17	300	100	100	1	4798660	1	4798660	300	0	0	0	0	40	0	0	0	0	0	0	99.56	4722077	10484	10193	300	40
Mut_18	300	100	100	1	4798660	1	4798660	300	0	0	0	0	40	0	0	0	0	0	0	99.56	4722086	10492	10184	300	40
Mut_19	298	100	100	1	4798660	1	4798660	300	0	0	0	0	40	0	0	2	0	0	0	99.56	4721942	10473	10328	298	40
Mut_2	300	100	100	1	4798660	1	4798660	300	0	0	0	0	40	0	0	0	0	0	0	99.57	4722191	10473	10079	298	40
Mut_20	298	100	100	1	4798660	1	4798660	300	0	0	0	0	40	0	0	2	0	0	0	99.56	4722003	10480	10267	298	40
Mut_21	300	100	100	1	4798660	1	4798660	300	0	0	0	0	40	0	0	0	0	0	0	99.56	4721964	10493	10306	300	40
Mut_22	298	100	100	1	4798660	1	4798660	300	0	0	0	0	40	0	0	2	0	0	0	99.56	4721895	10467	10375	298	40
Mut_23	300	100	100	1	4798660	1	4798660	300	0	0	0	0	40	0	0	0	0	0	0	99.56	4721898	10504	10372	300	40
Mut_24	300	100	100	1	4798660	1	4798660	300	0	0	0	0	40	0	0	0	0	0	0	99.56	4721913	10489	10357	300	40
Mut_25	300	100	100	1	4798660	1	4798660	300	0	0	0	0	40	0	0	0	0	0	0	99.56	4722020	10490	10250	300	40
Mut_26	300	100	100	1	4798660	1	4798660	300	0	0	0	0	40	0	0	0	0	0	0	99.56	4721956	10460	10314	300	40
Mut_27	298	100	100	1	4798660	1	4798660	300	0	0	0	0	40	0	0	2	0	0	0	99.56	4721968	10462	10302	298	40
Mut_28	300	100	100	1	4798660	1	4798660	300	0	0	0	0	40	0	0	0	0	0	0	99.56	4722062	10488	10208	300	40
Mut_29	300	100	100	1	4798660	1	4798660	300	0	0	0	0	40	0	0	0	0	0	0	99.56	4721879	10490	10391	300	40
Mut_3	300	100	100	1	4798660	1	4798660	300	0	0	0	0	40	0	0	0	0	0	0	99.56	4722103	10481	10167	298	40
Mut_30	300	100	100	1	4798660	1	4798660	300	0	0	0	0	40	0	0	0	0	0	0	99.56	4722058	10490	10212	300	40
Mut_31	296	100	100	1	4798660	1	4798660	300	0	0	0	0	40	0	0	4	0	0	0	99.56	4721888	10492	10382	300	40
Mut_32	300	100	100	1	4798660	1	4798660	300	0	0	0	0	40	0	0	0	0	0	0	99.56	4721985	10497	10285	300	40
Mut_33	300	100	100	1	4798660	1	4798660	300	0	0	0	0	40	0	0	0	0	0	0	99.56	4721983	10481	10287	300	40
Mut_34	300	100	100	1	4798660	1	4798660	300	0	0	0	0	40	0	0	0	0	0	0	99.56	4721938	10500	10332	300	40
Mut_35	300	100	100	1	4798660	1	4798660	300	0	0	0	0	40	0	0	0	0	0	0	99.56	4721826	10510	10444	300	40
Mut_36	300	100	100	1	4798660	1	4798660	300	0	0	0	0	40	0	0	0	0	0	0	99.56	4722005	10487	10265	300	40
Mut_37	300	100	100	1	4798660	1	4798660	300	0	0	0	0	40	0	0	0	0	0	0	99.56	4721967	10493	10303	300	40
Mut_38	300	100	100	1	4798660	1	4798660	300	0	0	0	0	40	0	0	0	0	0	0	99.56	4721963	10486	10307	300	40
Mut_39	300	100	100	1	4798660	1	4798660	300	0	0	0	0	40	0	0	0	0	0	0	99.56	4722061	10467	10209	298	40
Mut_4	300	100	100	1	4798660	1	4798660	300	0	0	0	0	40	0	0	0	0	0	0	99.56	4721983	10487	10287	300	40
Mut_40	300	100	100	1	4798660	1	4798660	300	0	0	0	0	40	0	0	0	0	0	0	99.56	4721959	10489	10311	300	40
Mut_41	300	100	100	1	4798660	1	4798660	300	0	0	0	0	40	0	0	0	0	0	0	99.56	4721982	10488	10288	300	40
Mut_42	300	100	100	1	4798660	1	4798660	300	0	0	0	0	40	0	0	0	0	0	0	99.56	4722043	10499	10227	300	40
Mut_43	300	100	100	1	4798660	1	4798660	300	0	0	0	0	40	0	0	0	0	0	0	99.56	4722013	10491	10257	300	40
Mut_44	300	100	100	1	4798660	1	4798660	300	0	0	0	0	40	0	0	0	0	0	0	99.56	4722040	10478	10230	300	40
Mut_45	300	100	100	1	4798660	1	4798660	300	0	0	0	0	40	0	0	0	0	0	0	99.56	4722011	10493	10259	300	40
Mut_46	300	100	100	1	4798660	1	4798660	300	0	0	0	0	40	0	0	0	0	0	0	99.56	4722042	10493	10228	300	40
Mut_47	300	100	100	1	4798660	1	4798660	300	0	0	0	0	40	0	0	0	0	0	0	99.56	4722042	10490	10228	300	40
Mut_48	294	100	100	1	4798660	1	4798660	300	0	0	0	0	40	0	0	6	0	0	0	99.56	4722104	10477	10166	298	40
Mut_49	293	100	100	1	4798660	1	4798660	300	0	0	0	0	40	0	0	7	0	0	0	99.56	4721875	10461	10395	298	40
Mut_5	300	100	100	1	4798660	1	4798660	300	0	0	0	0	40	0	0	0	0	0	0	99.56	4722023	10489	10247	300	40
Mut_50	300	100	100	1	4798660	1	4798660	300	0	0	0	0	40	0	0	0	0	0	0	99.56	4721898	10493	10372	300	40
Mut_51	298	100	100	1	4798660	1	4798660	300	0	0	0	0	40	0	0	2	0	0	0	99.56	4721956	10466	10314	298	40
Mut_52	298	100	100	1	4798660	1	4798660	300	0	0	0	0	40	0	0	2	0	0	0	99.56	4721944	10469	10326	298	40
Mut_53	300	100	100	1	4798660	1	4798660	300	0	0	0	0	40	0	0	0	0	0	0	99.56	4721904	10486	10366	300	40
Mut_54	300	100	100	1	4798660	1	4798660	300	0	0	0	0	40	0	0	0	0	0	0	99.56	4721922	10496	10348	300	40
Mut_55	300	100	100	1	4798660	1	4798660	300	0	0	0	0	40	0	0	0	0	0	0	99.56	4721926	10475	10344	299	39
Mut_56	300	100	100	1	4798660	1	4798660	300	0	0	0	0	40	0	0	0	0	0	0	99.56	4722030	10492	10240	300	40
Mut_57	296	100	100	1	4798660	1	4798660	300	0	0	0	0	40	0	0	4	0	0	0	99.56	4722062	10431	10208	295	39
Mut_58	300	100	100	1	4798660	1	4798660	300	0	0	0	0	40	0	0	0	0	0	0	99.56	4721869	10490	10401	300	40
Mut_59	300	100	100	1	4798660	1	4798660	300	0	0	0	0	40	0	0	0	0	0	0	99.56	4721920	10492	10350	300	40
Mut_6	300	100	100	1	4798660	1	4798660	300	0	0	0	0	40	0	0	0	0	0	0	99.57	4722153	10478	10117	300	40
Mut_60	300	100	100	1	4798660	1	4798660	300	0	0	0	0	40	0	0	0	0	0	0	99.56	4721885	10489	10385	300	40
Mut_61	300	100	100	1	4798660	1	4798660	300	0	0	0	0	40	0	0	0	0	0	0	99.56	4722107	10488	10163	300	40
Mut_62	300	100	100	1	4798660	1	4798660	300	0	0	0	0	40	0	0	0	0	0	0	99.56	4721942	10495	10328	300	40
Mut_63	300	100	100	1	4798660	1	4798660	300	0	0	0	0	40	0	0	0	0	0	0	99.57	4722217	10479	10053	299	39
Mut_64	300	100	100	1	4798660	1	4798660	300	0	0	0	0	40	0	0	0	0	0	0	99.56	4722028	10479	10242	300	40
Mut_65	298	100	100	1	4798660	1	4798660	300	0	0	0	0	40	0	0	2	0	0	0	99.56	4721911	10452	10359	298	40
Mut_66	296	100	100	1	4798660	1	4798660	300	0	0	0	0	40	0	0	4	0	0	0	99.57	4722088	10436	10182	296	40
Mut_67	300	100	100	1	4798660	1	4798660	300	0	0	0	0	40	0	0	0	0	0	0	99.56	4722027	10466	10243	298	40
Mut_68	300	100	100	1	4798660	1	4798660	300	0	0	0	0	40	0	0	0	0	0	0	99.56	4721902	10492	10368	300	40
Mut_69	300	100	100	1	4798660	1	4798660	300	0	0	0	0	40	0	0	0	0	0	0	99.56	4721966	10459	10304	299	39
Mut_7	300	100	100	1	4798660	1	4798660	300	0	0	0	0	40	0	0	0	0	0	0	99.56	4722016	10489	10254	300	40
Mut_70	300	100	100	1	4798660	1	4798660	300	0	0	0	0	40	0	0	0	0	0	0	99.56	4721960	10484	10310	300	40
Mut_71	298	100	100	1	4798660	1	4798660	300	0	0	0	0	40	0	0	2	0	0	0	99.56	4722062	10476	10208	298	40
Mut_72	300	100	100	1	4798660	1	4798660	300	0	0	0	0	40	0	0	0	0	0	0	99.56	4721952	10484	10318	300	40
Mut_73	300	100	100	1	4798660	1	4798660	300	0	0	0	0	40	0	0	0	0	0	0	99.56	4721998	10491	10272	300	40
Mut_74	300	100	100	1	4798660	1	4798660	300	0	0	0	0	40	0	0	0	0	0	0	99.56	4721952	10483	10318	300	40
Mut_75	300	100	100	1	4798660	1	4798660	300	0	0	0	0	40	0	0	0	0	0	0	99.56	4722056	10486	10214	300	40
Mut_76	300	100	100	1	4798660	1	4798660	300	0	0	0	0	40	0	0	0	0	0	0	99.56	4722046	10492	10224	300	40
Mut_77	300	100	100	1	4798660	1	4798660	300	0	0	0	0	40	0	0	0	0	0	0	99.56	4722096	10481	10174	299	39
Mut_78	298	100	100	1	4798660	1	4798660	300	0	0	0	0	40	0	0	2	0	0	0	99.56	4721979	10444	10291	296	40
Mut_79	300	100	100	1	4798660	1	4798660	300	0	0	0	0	40	0	0	0	0	0	0	99.56	4721857	10480	10413	300	40
Mut_8	300	100	100	1	4798660	1	4798660	300	0	0	0	0	40	0	0	0	0	0	0	99.56	4722049	10474	10221	300	40
Mut_80	298	100	100	1	4798660	1	4798660	300	0	0	0	0	40	0	0	2	0	0	0	99.56	4721946	10479	10324	298	40
Mut_81	300	100	100	1	4798660	1	4798660	300	0	0	0	0	40	0	0	0	0	0	0	99.56	4722077	10494	10193	300	40
Mut_82	296	100	100	1	4798660	1	4798660	300	0	0	0	0	40	0	0	4	0	0	0	99.56	4722016	10446	10254	296	40
Mut_83	296	100	100	1	4798660	1	4798660	300	0	0	0	0	40	0	0	4	0	0	0	99.56	4722043	10439	10227	296	40
Mut_84	298	100	100	1	4798660	1	4798660	300	0	0	0	0	40	0	0	2	0	0	0	99.56	4721979	10471	10291	298	40
Mut_85	298	100	100	1	4798660	1	4798660	300	0	0	0	0	40	0	0	2	0	0	0	99.56	4721955	10468	10315	298	40
Mut_86	300	100	100	1	4798660	1	4798660	300	0	0	0	0	40	0	0	0	0	0	0	99.56	4722064	10492	10206	300	40
Mut_87	300	100	100	1	4798660	1	4798660	300	0	0	0	0	40	0	0	0	0	0	0	99.56	4721973	10497	10297	300	40
Mut_88	300	100	100	1	4798660	1	4798660	300	0	0	0	0	40	0	0	0	0	0	0	99.56	4722036	10486	10234	300	40
Mut_89	300	100	100	1	4798660	1	4798660	300	0	0	0	0	40	0	0	0	0	0	0	99.56	4721919	10485	10351	300	40
Mut_9	300	100	100	1	4798660	1	4798660	300	0	0	0	0	40	0	0	0	0	0	0	99.56	4722044	10491	10226	300	40
Mut_90	300	100	100	1	4798660	1	4798660	300	0	0	0	0	40	0	0	0	0	0	0	99.56	4721878	10464	10392	298	40
Mut_91	300	100	100	1	4798660	1	4798660	300	0	0	0	0	40	0	0	0	0	0	0	99.56	4722105	10480	10165	298	40
Mut_92	298	100	100	1	4798660	1	4798660	300	0	0	0	0	40	0	0	2	0	0	0	99.56	4721983	10447	10287	296	40
Mut_93	300	100	100	1	4798660	1	4798660	300	0	0	0	0	40	0	0	0	0	0	0	99.56	4721927	10484	10343	300	40
Mut_94	296	100	100	1	4798660	1	4798660	300	0	0	0	0	40	0	0	4	0	0	0	99.56	4722012	10450	10258	294	40
Mut_95	298	100	100	1	4798660	1	4798660	300	0	0	0	0	40	0	0	2	0	0	0	99.56	4722005	10467	10265	298	40
Mut_96	300	100	100	1	4798660	1	4798660	300	0	0	0	0	40	0	0	0	0	0	0	99.56	4721976	10491	10294	300	40
Mut_97	300	100	100	1	4798660	1	4798660	300	0	0	0	0	40	0	0	0	0	0	0	99.56	4722033	10497	10237	300	40
Mut_98	300	100	100	1	4798660	1	4798660	300	0	0	0	0	40	0	0	0	0	0	0	99.57	4722135	10467	10135	300	40
Mut_99	300	100	100	1	4798660	1	4798660	300	0	0	0	0	40	0	0	0	0	0	0	99.56	4721970	10492	10300	300	40

## Sheet: Table_S4
		Assembly statistics for SPAdes and SKESA assemblies
Isolate_ID	Assembler	Dataset	Contig_Count	Assembly_Bases	N50	N90	L50	L90
Agona	Raw	Agona_Reference	1	4798660	4798660	4798660	1	1
Mut_0	SKESA	100X	68	4730086	180690	50298	10	28
Mut_0	SKESA	20X	1674	4573150	4654	1370	307	1001
Mut_0	SKESA	40X	199	4703674	46893	14658	32	97
Mut_0	SKESA	60X	81	4725182	148754	45305	13	36
Mut_0	SKESA	80X	74	4727959	168684	48702	11	30
Mut_0	SPAdes	100X	79	4756890	234576	75086	7	20
Mut_0	SPAdes	20X	80	4756258	218461	65613	8	22
Mut_0	SPAdes	40X	77	4756625	234576	75086	7	20
Mut_0	SPAdes	60X	77	4756629	234576	75086	7	20
Mut_0	SPAdes	80X	79	4756890	234576	75086	7	20
Mut_1	SKESA	100X	69	4729701	180690	50298	10	28
Mut_1	SKESA	20X	1675	4575557	4493	1368	312	1008
Mut_1	SKESA	40X	191	4704300	50298	15253	30	94
Mut_1	SKESA	60X	83	4725745	133601	46101	14	36
Mut_1	SKESA	80X	73	4727914	168790	48702	11	30
Mut_1	SPAdes	100X	79	4756899	234578	75085	7	20
Mut_1	SPAdes	20X	82	4756614	218461	65615	8	21
Mut_1	SPAdes	40X	77	4756634	234578	75085	7	20
Mut_1	SPAdes	60X	77	4756645	234578	75085	7	20
Mut_1	SPAdes	80X	79	4756899	234578	75085	7	20
Mut_10	SKESA	100X	70	4730484	180785	50298	10	28
Mut_10	SKESA	20X	1655	4574552	4672	1385	304	990
Mut_10	SKESA	40X	189	4704654	46893	16237	29	91
Mut_10	SKESA	60X	82	4725498	148753	45305	13	36
Mut_10	SKESA	80X	74	4728447	168681	48700	11	30
Mut_10	SPAdes	100X	72	4756177	234580	75087	7	20
Mut_10	SPAdes	20X	81	4756051	218463	74748	7	21
Mut_10	SPAdes	40X	72	4756162	234580	75087	7	20
Mut_10	SPAdes	60X	77	4756812	234580	75087	7	20
Mut_10	SPAdes	80X	72	4756162	234580	75087	7	20
Mut_11	SKESA	100X	69	4729702	180691	50297	10	28
Mut_11	SKESA	20X	1666	4571863	4645	1371	306	990
Mut_11	SKESA	40X	194	4704277	46120	15830	34	102
Mut_11	SKESA	60X	84	4726351	148518	46101	13	36
Mut_11	SKESA	80X	73	4727750	168686	48700	11	30
Mut_11	SPAdes	100X	79	4756812	234580	75086	7	20
Mut_11	SPAdes	20X	83	4756980	234580	65606	7	21
Mut_11	SPAdes	40X	80	4757049	234580	75086	7	20
Mut_11	SPAdes	60X	77	4756669	234580	75086	7	20
Mut_11	SPAdes	80X	79	4756807	234580	75086	7	20
Mut_12	SKESA	100X	72	4730116	180692	50298	10	28
Mut_12	SKESA	20X	1671	4572063	4728	1336	296	1003
Mut_12	SKESA	40X	194	4704511	50298	14571	31	96
Mut_12	SKESA	60X	85	4725151	148754	45306	13	36
Mut_12	SKESA	80X	75	4728087	168681	48701	11	30
Mut_12	SPAdes	100X	83	4757550	234581	75085	7	20
Mut_12	SPAdes	20X	82	4757029	202723	75085	8	22
Mut_12	SPAdes	40X	77	4756517	234581	75085	7	20
Mut_12	SPAdes	60X	79	4756786	234581	75085	7	20
Mut_12	SPAdes	80X	77	4756520	234581	75085	7	20
Mut_13	SKESA	100X	70	4729974	180690	50298	10	28
Mut_13	SKESA	20X	1646	4573995	4712	1339	298	974
Mut_13	SKESA	40X	188	4704677	47230	17328	31	94
Mut_13	SKESA	60X	85	4726060	133676	46102	13	36
Mut_13	SKESA	80X	75	4728398	168682	48698	11	30
Mut_13	SPAdes	100X	79	4756590	234578	75085	7	20
Mut_13	SPAdes	20X	77	4756263	234578	74891	7	20
Mut_13	SPAdes	40X	77	4756537	234578	75085	7	20
Mut_13	SPAdes	60X	79	4756768	234578	75085	7	20
Mut_13	SPAdes	80X	79	4756590	234578	75085	7	20
Mut_14	SKESA	100X	69	4729255	180690	50298	10	28
Mut_14	SKESA	20X	1686	4571815	4423	1345	313	1018
Mut_14	SKESA	40X	192	4703663	46980	14852	35	97
Mut_14	SKESA	60X	81	4725429	148754	46102	13	35
Mut_14	SKESA	80X	72	4727707	168684	48703	11	30
Mut_14	SPAdes	100X	79	4757235	234579	75086	7	20
Mut_14	SPAdes	20X	77	4756449	234579	74892	7	20
Mut_14	SPAdes	40X	79	4757226	234579	75086	7	20
Mut_14	SPAdes	60X	77	4756976	234579	75086	7	20
Mut_14	SPAdes	80X	77	4756953	234579	75086	7	20
Mut_15	SKESA	100X	68	4729276	180691	50297	10	28
Mut_15	SKESA	20X	1668	4574474	4526	1363	313	1000
Mut_15	SKESA	40X	178	4704098	53089	17653	30	91
Mut_15	SKESA	60X	81	4724959	148753	45305	13	35
Mut_15	SKESA	80X	72	4727366	168682	48701	11	30
Mut_15	SPAdes	100X	79	4756893	234579	75087	7	20
Mut_15	SPAdes	20X	79	4756004	234579	74748	7	20
Mut_15	SPAdes	40X	85	4757894	234579	75087	7	20
Mut_15	SPAdes	60X	79	4756893	234579	75087	7	20
Mut_15	SPAdes	80X	79	4756880	234579	75087	7	20
Mut_16	SKESA	100X	73	4729396	180691	50298	10	28
Mut_16	SKESA	20X	1696	4571334	4516	1322	309	1020
Mut_16	SKESA	40X	198	4705043	48551	14032	32	94
Mut_16	SKESA	60X	87	4725132	148753	45305	13	36
Mut_16	SKESA	80X	77	4727865	168682	48701	11	30
Mut_16	SPAdes	100X	74	4755960	234580	75085	7	20
Mut_16	SPAdes	20X	69	4754982	234580	74891	7	20
Mut_16	SPAdes	40X	81	4757048	234580	75085	7	20
Mut_16	SPAdes	60X	72	4755904	234580	75085	7	20
Mut_16	SPAdes	80X	72	4755909	234580	75085	7	20
Mut_17	SKESA	100X	70	4729595	180740	50298	10	28
Mut_17	SKESA	20X	1671	4573804	4440	1385	321	1008
Mut_17	SKESA	40X	193	4705684	46120	13605	29	99
Mut_17	SKESA	60X	82	4725536	148756	46101	13	35
Mut_17	SKESA	80X	74	4727821	168684	48701	11	30
Mut_17	SPAdes	100X	73	4756092	234578	75087	7	20
Mut_17	SPAdes	20X	80	4756174	234578	65608	7	21
Mut_17	SPAdes	40X	76	4756463	234578	75087	7	20
Mut_17	SPAdes	60X	78	4756709	234578	75087	7	20
Mut_17	SPAdes	80X	73	4756092	234578	75087	7	20
Mut_18	SKESA	100X	65	4729924	183059	54296	10	27
Mut_18	SKESA	20X	1647	4572302	4552	1378	311	1004
Mut_18	SKESA	40X	195	4704394	48477	15237	32	93
Mut_18	SKESA	60X	84	4725581	133677	37698	13	37
Mut_18	SKESA	80X	72	4728022	168723	48701	11	30
Mut_18	SPAdes	100X	80	4756658	234578	75086	7	20
Mut_18	SPAdes	20X	84	4756602	218461	74892	8	21
Mut_18	SPAdes	40X	77	4756593	234578	75086	7	20
Mut_18	SPAdes	60X	78	4756396	234578	75086	7	20
Mut_18	SPAdes	80X	80	4756658	234578	75086	7	20
Mut_19	SKESA	100X	69	4730057	180688	54227	10	27
Mut_19	SKESA	20X	1687	4573684	4568	1319	306	1004
Mut_19	SKESA	40X	187	4705017	50047	19193	33	90
Mut_19	SKESA	60X	85	4726274	148752	45305	13	37
Mut_19	SKESA	80X	74	4728553	169571	50295	11	29
Mut_19	SPAdes	100X	84	4757816	234582	75085	7	20
Mut_19	SPAdes	20X	80	4756576	249200	92842	7	19
Mut_19	SPAdes	40X	77	4756510	234582	75085	7	20
Mut_19	SPAdes	60X	84	4757816	234582	75085	7	20
Mut_19	SPAdes	80X	84	4757816	234582	75085	7	20
Mut_2	SKESA	100X	71	4731241	183059	50298	9	27
Mut_2	SKESA	20X	1676	4575566	4575	1344	307	1014
Mut_2	SKESA	40X	190	4703983	50226	16784	29	92
Mut_2	SKESA	60X	83	4725534	148755	46122	13	34
Mut_2	SKESA	80X	75	4728941	169571	48701	10	29
Mut_2	SPAdes	100X	80	4757179	234581	75087	7	20
Mut_2	SPAdes	20X	87	4758213	234581	74893	7	20
Mut_2	SPAdes	40X	77	4756725	234581	75087	7	20
Mut_2	SPAdes	60X	77	4756787	234581	75087	7	20
Mut_2	SPAdes	80X	82	4757011	234581	75087	7	20
Mut_20	SKESA	100X	69	4729928	180687	50297	10	28
Mut_20	SKESA	20X	1675	4570137	4550	1377	306	1004
Mut_20	SKESA	40X	184	4704529	47125	19393	35	94
Mut_20	SKESA	60X	83	4725557	148752	44707	13	37
Mut_20	SKESA	80X	74	4728639	168683	48701	11	30
Mut_20	SPAdes	100X	74	4756155	234580	75087	7	20
Mut_20	SPAdes	20X	89	4758331	203932	75087	8	22
Mut_20	SPAdes	40X	74	4756154	234580	75087	7	20
Mut_20	SPAdes	60X	72	4755901	234580	75087	7	20
Mut_20	SPAdes	80X	74	4756154	234580	75087	7	20
Mut_21	SKESA	100X	71	4730358	180691	50299	10	28
Mut_21	SKESA	20X	1647	4577279	4575	1406	303	990
Mut_21	SKESA	40X	200	4704198	45759	15255	33	101
Mut_21	SKESA	60X	84	4725910	133678	46102	13	36
Mut_21	SKESA	80X	76	4729038	168683	48701	11	30
Mut_21	SPAdes	100X	84	4757840	234580	75242	7	20
Mut_21	SPAdes	20X	85	4757508	234580	65597	7	21
Mut_21	SPAdes	40X	82	4757558	234580	75242	7	20
Mut_21	SPAdes	60X	85	4757939	234580	75242	7	20
Mut_21	SPAdes	80X	84	4757836	234580	75242	7	20
Mut_22	SKESA	100X	70	4729844	180691	50298	10	28
Mut_22	SKESA	20X	1654	4575098	4460	1365	315	1000
Mut_22	SKESA	40X	187	4704756	49541	15401	28	87
Mut_22	SKESA	60X	83	4726088	148752	46102	13	35
Mut_22	SKESA	80X	74	4728217	168681	48701	11	30
Mut_22	SPAdes	100X	79	4756799	234578	75086	7	20
Mut_22	SPAdes	20X	82	4756573	234578	74892	7	20
Mut_22	SPAdes	40X	79	4756777	234578	75086	7	20
Mut_22	SPAdes	60X	79	4756789	234578	75086	7	20
Mut_22	SPAdes	80X	77	4756545	234578	75086	7	20
Mut_23	SKESA	100X	67	4729669	180690	50298	10	28
Mut_23	SKESA	20X	1677	4574104	4485	1342	308	1013
Mut_23	SKESA	40X	188	4704360	46894	14483	30	96
Mut_23	SKESA	60X	80	4725532	148754	45305	13	36
Mut_23	SKESA	80X	71	4727528	168683	48372	11	30
Mut_23	SPAdes	100X	82	4757685	234577	75242	7	20
Mut_23	SPAdes	20X	79	4758553	218462	75242	7	21
Mut_23	SPAdes	40X	77	4756689	234577	75242	7	20
Mut_23	SPAdes	60X	80	4757408	234577	75242	7	20
Mut_23	SPAdes	80X	77	4756687	234577	75242	7	20
Mut_24	SKESA	100X	68	4730244	180690	54226	10	27
Mut_24	SKESA	20X	1660	4571584	4570	1333	302	995
Mut_24	SKESA	40X	195	4704252	45448	14406	35	100
Mut_24	SKESA	60X	83	4726065	148748	45304	13	36
Mut_24	SKESA	80X	73	4728390	168683	48691	11	30
Mut_24	SPAdes	100X	79	4757034	234578	75165	7	20
Mut_24	SPAdes	20X	78	4757050	234578	75165	7	20
Mut_24	SPAdes	40X	79	4756994	234578	75165	7	20
Mut_24	SPAdes	60X	77	4756780	234578	75165	7	20
Mut_24	SPAdes	80X	79	4757021	234578	75165	7	20
Mut_25	SKESA	100X	70	4729368	180690	50298	10	28
Mut_25	SKESA	20X	1704	4571925	4529	1302	311	1015
Mut_25	SKESA	40X	181	4705535	48551	17329	31	91
Mut_25	SKESA	60X	83	4725309	148755	45305	13	36
Mut_25	SKESA	80X	74	4727971	168682	48701	11	30
Mut_25	SPAdes	100X	79	4756781	234579	75084	7	20
Mut_25	SPAdes	20X	79	4755155	218462	75084	8	21
Mut_25	SPAdes	40X	77	4756460	234579	75084	7	20
Mut_25	SPAdes	60X	79	4756781	234579	75084	7	20
Mut_25	SPAdes	80X	79	4756781	234579	75084	7	20
Mut_26	SKESA	100X	68	4730040	180691	50413	10	28
Mut_26	SKESA	20X	1683	4575960	4583	1276	300	1008
Mut_26	SKESA	40X	196	4704932	45907	15416	32	98
Mut_26	SKESA	60X	81	4725779	148752	46102	13	35
Mut_26	SKESA	80X	72	4728415	168684	48701	11	30
Mut_26	SPAdes	100X	80	4757239	234583	75084	7	20
Mut_26	SPAdes	20X	83	4757040	234583	74745	7	20
Mut_26	SPAdes	40X	78	4756980	234583	75084	7	20
Mut_26	SPAdes	60X	82	4757493	234583	75084	7	20
Mut_26	SPAdes	80X	80	4757239	234583	75084	7	20
Mut_27	SKESA	100X	71	4730267	180688	50298	10	28
Mut_27	SKESA	20X	1671	4574649	4434	1375	307	1011
Mut_27	SKESA	40X	195	4704681	46600	14540	30	95
Mut_27	SKESA	60X	81	4725300	148753	46102	13	35
Mut_27	SKESA	80X	73	4728253	168683	48700	11	30
Mut_27	SPAdes	100X	79	4756813	234581	75085	7	20
Mut_27	SPAdes	20X	73	4754867	218465	75085	8	21
Mut_27	SPAdes	40X	78	4756667	234581	75085	7	20
Mut_27	SPAdes	60X	77	4756559	234581	75085	7	20
Mut_27	SPAdes	80X	79	4756813	234581	75085	7	20
Mut_28	SKESA	100X	70	4730843	180690	50298	10	28
Mut_28	SKESA	20X	1711	4572366	4557	1315	313	1039
Mut_28	SKESA	40X	193	4704626	48307	15197	33	99
Mut_28	SKESA	60X	79	4725747	148756	46103	13	35
Mut_28	SKESA	80X	71	4728616	168682	50298	11	29
Mut_28	SPAdes	100X	79	4756987	234581	75086	7	20
Mut_28	SPAdes	20X	80	4756489	234581	74892	7	20
Mut_28	SPAdes	40X	77	4756696	234581	75086	7	20
Mut_28	SPAdes	60X	79	4756981	234581	75086	7	20
Mut_28	SPAdes	80X	80	4757091	234581	75086	7	20
Mut_29	SKESA	100X	69	4730161	180690	50297	10	28
Mut_29	SKESA	20X	1685	4573371	4397	1340	309	1019
Mut_29	SKESA	40X	184	4705822	45071	17653	32	98
Mut_29	SKESA	60X	83	4725859	148752	45306	13	36
Mut_29	SKESA	80X	74	4728248	168681	48701	11	30
Mut_29	SPAdes	100X	79	4756885	234579	75086	7	20
Mut_29	SPAdes	20X	79	4756345	234579	65615	7	21
Mut_29	SPAdes	40X	82	4757503	234579	75086	7	20
Mut_29	SPAdes	60X	77	4756631	234579	75086	7	20
Mut_29	SPAdes	80X	79	4756883	234579	75086	7	20
Mut_3	SKESA	100X	70	4729630	180692	50298	10	28
Mut_3	SKESA	20X	1677	4572818	4604	1292	290	997
Mut_3	SKESA	40X	198	4703748	46120	15115	35	101
Mut_3	SKESA	60X	84	4725933	148752	46102	13	35
Mut_3	SKESA	80X	74	4728318	168684	48700	11	30
Mut_3	SPAdes	100X	74	4755796	234579	75087	7	20
Mut_3	SPAdes	20X	80	4756678	234579	75087	7	20
Mut_3	SPAdes	40X	74	4756093	234579	75087	7	20
Mut_3	SPAdes	60X	74	4756104	234579	75087	7	20
Mut_3	SPAdes	80X	74	4756091	234579	75087	7	20
Mut_30	SKESA	100X	69	4730174	183059	50298	10	27
Mut_30	SKESA	20X	1702	4570362	4284	1343	329	1034
Mut_30	SKESA	40X	197	4704995	45448	14267	34	99
Mut_30	SKESA	60X	86	4725611	133676	45305	13	37
Mut_30	SKESA	80X	74	4727932	168683	48691	11	30
Mut_30	SPAdes	100X	79	4756797	234580	75088	7	20
Mut_30	SPAdes	20X	81	4756533	234580	75088	7	20
Mut_30	SPAdes	40X	83	4757548	218460	75088	7	21
Mut_30	SPAdes	60X	82	4757539	234580	75088	7	20
Mut_30	SPAdes	80X	79	4756797	234580	75088	7	20
Mut_31	SKESA	100X	70	4730120	180689	50298	10	28
Mut_31	SKESA	20X	1684	4574003	4532	1380	309	1011
Mut_31	SKESA	40X	199	4705080	45500	17557	33	98
Mut_31	SKESA	60X	82	4725965	148752	45305	13	36
Mut_31	SKESA	80X	73	4728454	168684	48701	11	30
Mut_31	SPAdes	100X	79	4756791	234580	75086	7	20
Mut_31	SPAdes	20X	79	4755545	191785	65592	8	22
Mut_31	SPAdes	40X	81	4757208	234580	75086	7	20
Mut_31	SPAdes	60X	77	4756534	234580	75086	7	20
Mut_31	SPAdes	80X	79	4756791	234580	75086	7	20
Mut_32	SKESA	100X	70	4730449	180690	50298	10	28
Mut_32	SKESA	20X	1660	4571727	4560	1381	308	996
Mut_32	SKESA	40X	208	4704282	40312	14676	36	107
Mut_32	SKESA	60X	82	4726214	148753	46102	13	35
Mut_32	SKESA	80X	74	4728939	168683	48701	11	30
Mut_32	SPAdes	100X	76	4756740	234578	75146	7	20
Mut_32	SPAdes	20X	84	4757145	234578	75146	7	20
Mut_32	SPAdes	40X	80	4757215	234578	75146	7	20
Mut_32	SPAdes	60X	76	4756720	234578	75146	7	20
Mut_32	SPAdes	80X	76	4756707	234578	75146	7	20
Mut_33	SKESA	100X	68	4729482	180690	50298	10	28
Mut_33	SKESA	20X	1645	4573571	4729	1387	298	985
Mut_33	SKESA	40X	190	4705173	45448	17328	34	97
Mut_33	SKESA	60X	83	4725508	148752	46100	13	35
Mut_33	SKESA	80X	74	4727642	168684	48701	11	30
Mut_33	SPAdes	100X	79	4756861	234578	75086	7	20
Mut_33	SPAdes	20X	81	4756383	218523	74892	7	21
Mut_33	SPAdes	40X	78	4756676	234578	75086	7	20
Mut_33	SPAdes	60X	79	4756858	234578	75086	7	20
Mut_33	SPAdes	80X	77	4756607	234578	75086	7	20
Mut_34	SKESA	100X	70	4729674	180690	50298	10	28
Mut_34	SKESA	20X	1662	4574216	4369	1385	308	1007
Mut_34	SKESA	40X	198	4704680	42304	15162	34	104
Mut_34	SKESA	60X	83	4725442	148754	45305	13	36
Mut_34	SKESA	80X	73	4727948	168683	48701	11	30
Mut_34	SPAdes	100X	72	4756043	234578	75086	7	20
Mut_34	SPAdes	20X	73	4755661	218463	75086	7	21
Mut_34	SPAdes	40X	72	4756042	234578	75086	7	20
Mut_34	SPAdes	60X	72	4756192	234578	75086	7	20
Mut_34	SPAdes	80X	72	4756034	234578	75086	7	20
Mut_35	SKESA	100X	72	4730774	180690	50298	10	28
Mut_35	SKESA	20X	1669	4573934	4506	1355	315	1013
Mut_35	SKESA	40X	168	4707084	55327	19225	28	83
Mut_35	SKESA	60X	83	4726074	148752	45305	13	36
Mut_35	SKESA	80X	73	4728127	168682	48701	11	30
Mut_35	SPAdes	100X	79	4756794	234581	75085	7	20
Mut_35	SPAdes	20X	79	4756727	234581	75085	7	20
Mut_35	SPAdes	40X	79	4756777	234581	75085	7	20
Mut_35	SPAdes	60X	79	4756777	234581	75085	7	20
Mut_35	SPAdes	80X	79	4756794	234581	75085	7	20
Mut_36	SKESA	100X	69	4729926	180688	50298	10	28
Mut_36	SKESA	20X	1696	4573989	4537	1300	310	1019
Mut_36	SKESA	40X	187	4704687	46212	15499	33	98
Mut_36	SKESA	60X	80	4725902	148751	46102	13	35
Mut_36	SKESA	80X	72	4728947	180688	48690	10	29
Mut_36	SPAdes	100X	77	4756720	234577	75087	7	20
Mut_36	SPAdes	20X	86	4757439	234577	74748	7	20
Mut_36	SPAdes	40X	84	4757833	234577	75087	7	20
Mut_36	SPAdes	60X	78	4756836	234577	75087	7	20
Mut_36	SPAdes	80X	77	4756401	234577	75087	7	20
Mut_37	SKESA	100X	70	4730135	180689	50344	10	28
Mut_37	SKESA	20X	1689	4571976	4478	1328	326	1021
Mut_37	SKESA	40X	199	4704860	45070	16256	34	100
Mut_37	SKESA	60X	83	4725833	148752	46102	13	35
Mut_37	SKESA	80X	74	4728109	168682	48701	11	30
Mut_37	SPAdes	100X	77	4756686	234577	75086	7	20
Mut_37	SPAdes	20X	82	4757465	235418	75086	7	20
Mut_37	SPAdes	40X	76	4757017	261126	75086	6	19
Mut_37	SPAdes	60X	77	4756686	234577	75086	7	20
Mut_37	SPAdes	80X	77	4756686	234577	75086	7	20
Mut_38	SKESA	100X	72	4729993	168683	50297	11	29
Mut_38	SKESA	20X	1642	4577581	4685	1363	305	991
Mut_38	SKESA	40X	191	4704581	49154	17328	31	95
Mut_38	SKESA	60X	83	4726175	148752	45305	13	36
Mut_38	SKESA	80X	74	4727867	168683	48701	11	30
Mut_38	SPAdes	100X	79	4756885	234578	75085	7	20
Mut_38	SPAdes	20X	82	4756458	234578	74891	7	20
Mut_38	SPAdes	40X	84	4757772	234578	75085	7	20
Mut_38	SPAdes	60X	77	4756627	234578	75085	7	20
Mut_38	SPAdes	80X	79	4756884	234578	75085	7	20
Mut_39	SKESA	100X	69	4729446	180691	50298	10	28
Mut_39	SKESA	20X	1665	4574453	4486	1394	310	993
Mut_39	SKESA	40X	189	4705793	48170	15758	31	98
Mut_39	SKESA	60X	83	4725399	148753	45304	13	36
Mut_39	SKESA	80X	72	4728143	168685	50298	11	29
Mut_39	SPAdes	100X	79	4756352	234579	74747	7	20
Mut_39	SPAdes	20X	88	4757393	218466	75086	8	21
Mut_39	SPAdes	40X	77	4756299	234579	74747	7	20
Mut_39	SPAdes	60X	81	4757146	234579	75086	7	20
Mut_39	SPAdes	80X	80	4756680	234579	74747	7	20
Mut_4	SKESA	100X	70	4729630	180690	50298	10	28
Mut_4	SKESA	20X	1684	4574924	4475	1335	316	1011
Mut_4	SKESA	40X	194	4704630	46212	18483	34	95
Mut_4	SKESA	60X	85	4725375	148752	46102	13	36
Mut_4	SKESA	80X	74	4727802	168680	48701	11	30
Mut_4	SPAdes	100X	79	4756810	234580	75085	7	20
Mut_4	SPAdes	20X	79	4755642	234580	74891	7	20
Mut_4	SPAdes	40X	86	4757975	234580	75085	7	20
Mut_4	SPAdes	60X	77	4756600	234580	75085	7	20
Mut_4	SPAdes	80X	77	4756556	234580	75085	7	20
Mut_40	SKESA	100X	68	4729739	180692	50298	10	28
Mut_40	SKESA	20X	1662	4574325	4520	1354	310	1013
Mut_40	SKESA	40X	166	4706897	51052	17663	28	84
Mut_40	SKESA	60X	81	4725523	148753	46120	13	35
Mut_40	SKESA	80X	72	4727978	168684	48701	11	30
Mut_40	SPAdes	100X	72	4755433	234578	75087	7	20
Mut_40	SPAdes	20X	64	4753954	234578	74893	7	20
Mut_40	SPAdes	40X	72	4755360	234578	75087	7	20
Mut_40	SPAdes	60X	72	4755433	234578	75087	7	20
Mut_40	SPAdes	80X	72	4755433	234578	75087	7	20
Mut_41	SKESA	100X	68	4729368	180691	50298	10	28
Mut_41	SKESA	20X	1693	4570328	4390	1331	325	1026
Mut_41	SKESA	40X	193	4704403	48551	14327	31	98
Mut_41	SKESA	60X	81	4725668	148753	46092	13	35
Mut_41	SKESA	80X	72	4727794	168683	48701	11	30
Mut_41	SPAdes	100X	76	4756666	234577	75086	7	20
Mut_41	SPAdes	20X	80	4756431	218461	74708	7	21
Mut_41	SPAdes	40X	74	4756403	234577	75086	7	20
Mut_41	SPAdes	60X	76	4756465	234577	75086	7	20
Mut_41	SPAdes	80X	76	4756465	234577	75086	7	20
Mut_42	SKESA	100X	69	4729581	180689	50298	10	28
Mut_42	SKESA	20X	1648	4576999	4616	1376	302	982
Mut_42	SKESA	40X	193	4705241	45448	17328	35	97
Mut_42	SKESA	60X	80	4726005	148755	46102	13	35
Mut_42	SKESA	80X	73	4728277	168683	48702	11	30
Mut_42	SPAdes	100X	73	4755634	234639	75087	7	20
Mut_42	SPAdes	20X	82	4757243	234639	75087	7	20
Mut_42	SPAdes	40X	73	4755631	234639	75087	7	20
Mut_42	SPAdes	60X	73	4755634	234639	75087	7	20
Mut_42	SPAdes	80X	73	4755630	234639	75087	7	20
Mut_43	SKESA	100X	68	4729981	180690	50298	10	28
Mut_43	SKESA	20X	1680	4572742	4558	1336	309	998
Mut_43	SKESA	40X	181	4703865	48390	17920	31	88
Mut_43	SKESA	60X	79	4725238	148749	46102	13	35
Mut_43	SKESA	80X	73	4728169	168683	48702	11	30
Mut_43	SPAdes	100X	78	4756620	234580	75086	7	20
Mut_43	SPAdes	20X	81	4756509	234580	65612	7	21
Mut_43	SPAdes	40X	76	4756437	234580	75086	7	20
Mut_43	SPAdes	60X	76	4756477	234580	75086	7	20
Mut_43	SPAdes	80X	78	4756620	234580	75086	7	20
Mut_44	SKESA	100X	70	4730321	180688	50298	10	28
Mut_44	SKESA	20X	1650	4574770	4632	1407	307	995
Mut_44	SKESA	40X	211	4703585	48376	14276	34	101
Mut_44	SKESA	60X	83	4725653	148753	46115	13	35
Mut_44	SKESA	80X	74	4728475	168682	48702	11	30
Mut_44	SPAdes	100X	79	4756443	234575	74747	7	20
Mut_44	SPAdes	20X	77	4756120	234575	74747	7	20
Mut_44	SPAdes	40X	77	4756497	234575	75086	7	20
Mut_44	SPAdes	60X	77	4756528	234575	75086	7	20
Mut_44	SPAdes	80X	77	4756528	234575	75086	7	20
Mut_45	SKESA	100X	70	4729517	180690	50298	10	28
Mut_45	SKESA	20X	1652	4574345	4613	1339	305	992
Mut_45	SKESA	40X	202	4704340	46120	14091	33	101
Mut_45	SKESA	60X	81	4725748	148752	46104	13	35
Mut_45	SKESA	80X	75	4728011	168683	48701	11	30
Mut_45	SPAdes	100X	77	4756523	234579	75085	7	20
Mut_45	SPAdes	20X	78	4756262	234579	75085	7	20
Mut_45	SPAdes	40X	81	4757012	234579	75085	7	20
Mut_45	SPAdes	60X	79	4756777	234579	75085	7	20
Mut_45	SPAdes	80X	79	4756777	234579	75085	7	20
Mut_46	SKESA	100X	69	4729688	180689	50298	10	28
Mut_46	SKESA	20X	1684	4575077	4582	1360	320	1015
Mut_46	SKESA	40X	177	4704863	53089	18566	29	88
Mut_46	SKESA	60X	82	4725228	148752	45845	13	35
Mut_46	SKESA	80X	74	4728141	168685	48701	11	30
Mut_46	SPAdes	100X	79	4756796	234578	75084	7	20
Mut_46	SPAdes	20X	81	4757410	234578	75084	7	20
Mut_46	SPAdes	40X	79	4756769	234578	75084	7	20
Mut_46	SPAdes	60X	79	4756796	234578	75084	7	20
Mut_46	SPAdes	80X	79	4756796	234578	75084	7	20
Mut_47	SKESA	100X	71	4729831	180690	50299	10	28
Mut_47	SKESA	20X	1647	4572349	4634	1337	296	985
Mut_47	SKESA	40X	200	4703719	43266	15510	36	106
Mut_47	SKESA	60X	84	4725420	148753	45305	13	36
Mut_47	SKESA	80X	74	4728367	168682	48701	11	30
Mut_47	SPAdes	100X	84	4757913	234579	75087	7	20
Mut_47	SPAdes	20X	87	4757798	234579	75087	7	20
Mut_47	SPAdes	40X	80	4757438	234579	75087	7	20
Mut_47	SPAdes	60X	84	4758113	234579	75087	7	20
Mut_47	SPAdes	80X	85	4758037	234579	75087	7	20
Mut_48	SKESA	100X	70	4729617	180690	50298	10	28
Mut_48	SKESA	20X	1706	4575477	4422	1305	315	1027
Mut_48	SKESA	40X	189	4704550	48467	15462	32	96
Mut_48	SKESA	60X	83	4725081	148752	46101	13	35
Mut_48	SKESA	80X	74	4727884	168683	48701	11	30
Mut_48	SPAdes	100X	88	4758439	234578	75087	7	20
Mut_48	SPAdes	20X	91	4758673	249201	74893	7	20
Mut_48	SPAdes	40X	83	4758135	234578	75087	7	20
Mut_48	SPAdes	60X	81	4757857	234578	75087	7	20
Mut_48	SPAdes	80X	84	4758262	234578	75087	7	20
Mut_49	SKESA	100X	70	4729840	180689	50298	10	28
Mut_49	SKESA	20X	1659	4573055	4705	1339	300	989
Mut_49	SKESA	40X	193	4704132	48308	14753	30	92
Mut_49	SKESA	60X	84	4725947	155879	45305	12	35
Mut_49	SKESA	80X	74	4727880	168683	48701	11	30
Mut_49	SPAdes	100X	74	4756161	234580	75086	7	20
Mut_49	SPAdes	20X	80	4756190	234580	65614	7	21
Mut_49	SPAdes	40X	77	4756532	234580	75086	7	20
Mut_49	SPAdes	60X	77	4756542	234580	75086	7	20
Mut_49	SPAdes	80X	74	4756161	234580	75086	7	20
Mut_5	SKESA	100X	68	4730085	180690	50298	10	28
Mut_5	SKESA	20X	1681	4573817	4636	1329	305	1003
Mut_5	SKESA	40X	195	4705057	48552	16613	31	96
Mut_5	SKESA	60X	82	4726220	145904	45305	13	36
Mut_5	SKESA	80X	73	4728521	168682	48701	11	30
Mut_5	SPAdes	100X	71	4755868	234580	75086	7	20
Mut_5	SPAdes	20X	75	4755906	234393	75086	7	20
Mut_5	SPAdes	40X	72	4756217	234580	75086	7	20
Mut_5	SPAdes	60X	71	4755868	234580	75086	7	20
Mut_5	SPAdes	80X	71	4755868	234580	75086	7	20
Mut_50	SKESA	100X	70	4730549	180691	50298	10	28
Mut_50	SKESA	20X	1684	4576713	4547	1361	313	1017
Mut_50	SKESA	40X	195	4705752	44311	15137	35	102
Mut_50	SKESA	60X	82	4725902	148753	46102	13	35
Mut_50	SKESA	80X	74	4728645	168682	48707	11	30
Mut_50	SPAdes	100X	79	4756854	234580	75086	7	20
Mut_50	SPAdes	20X	82	4756351	234580	65611	7	21
Mut_50	SPAdes	40X	77	4756600	234580	75086	7	20
Mut_50	SPAdes	60X	82	4757491	234580	75086	7	20
Mut_50	SPAdes	80X	79	4756811	234580	75086	7	20
Mut_51	SKESA	100X	69	4730004	180690	50298	10	28
Mut_51	SKESA	20X	1673	4573807	4440	1339	315	1007
Mut_51	SKESA	40X	201	4704390	44908	14412	34	101
Mut_51	SKESA	60X	82	4725436	148751	44707	13	37
Mut_51	SKESA	80X	73	4728114	168683	48701	11	30
Mut_51	SPAdes	100X	79	4756785	234579	75086	7	20
Mut_51	SPAdes	20X	78	4756701	234579	75086	7	20
Mut_51	SPAdes	40X	77	4756631	234579	75086	7	20
Mut_51	SPAdes	60X	79	4756896	234579	75086	7	20
Mut_51	SPAdes	80X	79	4756896	234579	75086	7	20
Mut_52	SKESA	100X	70	4730185	180689	50298	10	28
Mut_52	SKESA	20X	1649	4571328	4706	1324	289	982
Mut_52	SKESA	40X	199	4704113	47606	15753	31	95
Mut_52	SKESA	60X	83	4725797	148753	46101	13	35
Mut_52	SKESA	80X	74	4728536	168684	48701	11	30
Mut_52	SPAdes	100X	79	4756914	234579	75086	7	20
Mut_52	SPAdes	20X	82	4757395	234579	75086	7	20
Mut_52	SPAdes	40X	74	4756240	234579	75086	7	20
Mut_52	SPAdes	60X	79	4756713	234579	75086	7	20
Mut_52	SPAdes	80X	77	4756658	234579	75086	7	20
Mut_53	SKESA	100X	70	4729973	180689	50298	10	28
Mut_53	SKESA	20X	1657	4573213	4725	1342	299	987
Mut_53	SKESA	40X	191	4706204	45344	18889	37	101
Mut_53	SKESA	60X	82	4725580	148755	45305	13	36
Mut_53	SKESA	80X	75	4728475	155878	48702	12	31
Mut_53	SPAdes	100X	79	4756580	234579	75085	7	20
Mut_53	SPAdes	20X	78	4756363	234579	74746	7	20
Mut_53	SPAdes	40X	76	4756452	234579	75085	7	20
Mut_53	SPAdes	60X	79	4756580	234579	75085	7	20
Mut_53	SPAdes	80X	79	4756633	234579	75085	7	20
Mut_54	SKESA	100X	71	4729544	180691	50298	10	28
Mut_54	SKESA	20X	1650	4572744	4541	1376	311	990
Mut_54	SKESA	40X	205	4703654	46120	14211	31	98
Mut_54	SKESA	60X	86	4725196	133677	44707	13	38
Mut_54	SKESA	80X	76	4728093	168682	48701	11	30
Mut_54	SPAdes	100X	79	4756795	234578	75086	7	20
Mut_54	SPAdes	20X	80	4756752	234578	74892	7	20
Mut_54	SPAdes	40X	77	4756538	234578	75086	7	20
Mut_54	SPAdes	60X	77	4756541	234578	75086	7	20
Mut_54	SPAdes	80X	79	4756792	234578	75086	7	20
Mut_55	SKESA	100X	70	4729561	180690	50298	10	28
Mut_55	SKESA	20X	1701	4569894	4616	1307	303	1004
Mut_55	SKESA	40X	177	4705749	50649	17329	31	90
Mut_55	SKESA	60X	80	4726110	156195	46102	12	34
Mut_55	SKESA	80X	73	4728238	180690	48701	10	29
Mut_55	SPAdes	100X	79	4756684	234577	75085	7	20
Mut_55	SPAdes	20X	75	4755446	234577	75085	7	20
Mut_55	SPAdes	40X	77	4756533	234577	75085	7	20
Mut_55	SPAdes	60X	79	4756666	234577	75085	7	20
Mut_55	SPAdes	80X	79	4756787	234577	75085	7	20
Mut_56	SKESA	100X	70	4730521	180832	50298	10	28
Mut_56	SKESA	20X	1645	4575064	4532	1398	313	997
Mut_56	SKESA	40X	191	4704116	46426	17653	34	98
Mut_56	SKESA	60X	81	4725884	155877	46102	12	34
Mut_56	SKESA	80X	74	4728605	180688	48701	10	29
Mut_56	SPAdes	100X	85	4757822	234578	75086	7	20
Mut_56	SPAdes	20X	84	4757676	234578	75086	7	20
Mut_56	SPAdes	40X	85	4757822	234578	75086	7	20
Mut_56	SPAdes	60X	82	4757435	234578	75086	7	20
Mut_56	SPAdes	80X	82	4757441	234578	75086	7	20
Mut_57	SKESA	100X	68	4729361	180689	50299	9	27
Mut_57	SKESA	20X	1686	4568887	4560	1332	308	1008
Mut_57	SKESA	40X	189	4703951	51145	16950	31	87
Mut_57	SKESA	60X	82	4725356	148753	46102	13	35
Mut_57	SKESA	80X	73	4727431	168684	48701	11	30
Mut_57	SPAdes	100X	79	4756796	234579	75085	7	20
Mut_57	SPAdes	20X	76	4756349	234579	75085	7	20
Mut_57	SPAdes	40X	82	4757360	234579	75085	7	20
Mut_57	SPAdes	60X	80	4756586	234579	75085	7	20
Mut_57	SPAdes	80X	79	4756796	234579	75085	7	20
Mut_58	SKESA	100X	69	4729492	180691	50299	10	28
Mut_58	SKESA	20X	1678	4575292	4385	1357	314	1020
Mut_58	SKESA	40X	181	4704457	45343	17328	30	92
Mut_58	SKESA	60X	83	4725251	148753	45305	13	36
Mut_58	SKESA	80X	74	4727720	168682	48701	11	30
Mut_58	SPAdes	100X	79	4756791	234580	75087	7	20
Mut_58	SPAdes	20X	89	4756924	218463	74748	8	21
Mut_58	SPAdes	40X	77	4756520	234580	75087	7	20
Mut_58	SPAdes	60X	77	4756535	234580	75087	7	20
Mut_58	SPAdes	80X	79	4756789	234580	75087	7	20
Mut_59	SKESA	100X	69	4730311	180688	50299	10	28
Mut_59	SKESA	20X	1679	4571820	4678	1336	309	997
Mut_59	SKESA	40X	176	4705333	52361	17865	29	87
Mut_59	SKESA	60X	84	4725634	133676	45304	13	37
Mut_59	SKESA	80X	74	4728864	168683	48701	11	30
Mut_59	SPAdes	100X	79	4756801	234580	75086	7	20
Mut_59	SPAdes	20X	82	4756655	234580	75086	7	20
Mut_59	SPAdes	40X	77	4756546	234580	75086	7	20
Mut_59	SPAdes	60X	77	4756540	234580	75086	7	20
Mut_59	SPAdes	80X	79	4756801	234580	75086	7	20
Mut_6	SKESA	100X	72	4729706	180690	50298	10	28
Mut_6	SKESA	20X	1700	4571950	4250	1337	323	1047
Mut_6	SKESA	40X	183	4705340	47326	15812	29	92
Mut_6	SKESA	60X	82	4725279	148751	46101	13	35
Mut_6	SKESA	80X	76	4727896	168683	48701	11	30
Mut_6	SPAdes	100X	79	4756783	234580	75087	7	20
Mut_6	SPAdes	20X	81	4757026	234580	75087	7	20
Mut_6	SPAdes	40X	77	4756527	234580	75087	7	20
Mut_6	SPAdes	60X	77	4756527	234580	75087	7	20
Mut_6	SPAdes	80X	79	4756781	234580	75087	7	20
Mut_60	SKESA	100X	70	4729886	180690	50298	10	28
Mut_60	SKESA	20X	1675	4571629	4552	1351	315	1010
Mut_60	SKESA	40X	185	4704581	54469	16606	28	89
Mut_60	SKESA	60X	82	4725727	148754	46102	13	35
Mut_60	SKESA	80X	72	4728091	168686	48703	11	30
Mut_60	SPAdes	100X	86	4758322	234579	75086	7	20
Mut_60	SPAdes	20X	82	4756899	218459	74892	8	21
Mut_60	SPAdes	40X	81	4757483	234579	75086	7	20
Mut_60	SPAdes	60X	85	4758241	234579	75086	7	20
Mut_60	SPAdes	80X	81	4757431	234579	75086	7	20
Mut_61	SKESA	100X	69	4730019	180687	50298	10	27
Mut_61	SKESA	20X	1682	4575382	4419	1373	337	1025
Mut_61	SKESA	40X	197	4704483	46906	14483	31	96
Mut_61	SKESA	60X	88	4725370	127679	45306	14	38
Mut_61	SKESA	80X	74	4727903	168684	48701	11	30
Mut_61	SPAdes	100X	75	4756167	234580	75085	7	20
Mut_61	SPAdes	20X	70	4754803	234580	79014	7	19
Mut_61	SPAdes	40X	74	4756040	234580	75085	7	20
Mut_61	SPAdes	60X	74	4756040	234580	75085	7	20
Mut_61	SPAdes	80X	75	4756167	234580	75085	7	20
Mut_62	SKESA	100X	69	4729605	180691	50300	10	28
Mut_62	SKESA	20X	1684	4574156	4526	1377	311	1021
Mut_62	SKESA	40X	210	4704406	45080	14967	34	105
Mut_62	SKESA	60X	85	4725605	148754	45304	13	36
Mut_62	SKESA	80X	73	4727818	168685	48699	11	30
Mut_62	SPAdes	100X	79	4756799	234581	75087	7	20
Mut_62	SPAdes	20X	84	4757761	218461	75087	8	21
Mut_62	SPAdes	40X	79	4756796	234581	75087	7	20
Mut_62	SPAdes	60X	79	4756790	234581	75087	7	20
Mut_62	SPAdes	80X	79	4756799	234581	75087	7	20
Mut_63	SKESA	100X	69	4729302	180690	50297	10	27
Mut_63	SKESA	20X	1697	4574017	4535	1353	317	1015
Mut_63	SKESA	40X	194	4703827	44616	15163	32	103
Mut_63	SKESA	60X	81	4724897	155967	45305	12	35
Mut_63	SKESA	80X	73	4727487	180690	48700	10	29
Mut_63	SPAdes	100X	84	4757811	234578	75087	7	20
Mut_63	SPAdes	20X	91	4758112	234578	75087	7	20
Mut_63	SPAdes	40X	82	4757541	234578	75087	7	20
Mut_63	SPAdes	60X	82	4757610	234578	75087	7	20
Mut_63	SPAdes	80X	84	4757811	234578	75087	7	20
Mut_64	SKESA	100X	68	4730169	180688	50298	10	28
Mut_64	SKESA	20X	1658	4573269	4436	1392	308	998
Mut_64	SKESA	40X	192	4704265	43847	17653	36	100
Mut_64	SKESA	60X	83	4725796	148754	46099	13	35
Mut_64	SKESA	80X	73	4728439	168683	48700	11	30
Mut_64	SPAdes	100X	72	4756190	234579	75086	7	20
Mut_64	SPAdes	20X	70	4754894	234579	74747	7	20
Mut_64	SPAdes	40X	72	4755980	234579	75086	7	20
Mut_64	SPAdes	60X	70	4755936	234579	75086	7	20
Mut_64	SPAdes	80X	72	4756190	234579	75086	7	20
Mut_65	SKESA	100X	69	4729948	180689	50298	10	28
Mut_65	SKESA	20X	1725	4572599	4401	1293	326	1041
Mut_65	SKESA	40X	194	4704095	46435	15095	30	96
Mut_65	SKESA	60X	82	4725570	148755	45305	13	36
Mut_65	SKESA	80X	73	4728223	168684	48700	11	30
Mut_65	SPAdes	100X	80	4757039	234579	75086	7	20
Mut_65	SPAdes	20X	77	4755785	234579	74708	7	20
Mut_65	SPAdes	40X	76	4756531	234579	75086	7	20
Mut_65	SPAdes	60X	77	4756653	234579	75086	7	20
Mut_65	SPAdes	80X	79	4756908	234579	75086	7	20
Mut_66	SKESA	100X	67	4729693	180690	50298	10	28
Mut_66	SKESA	20X	1645	4573608	4616	1361	301	979
Mut_66	SKESA	40X	199	4703976	45070	13640	33	102
Mut_66	SKESA	60X	82	4725217	133673	46101	13	36
Mut_66	SKESA	80X	72	4727810	168683	48701	11	30
Mut_66	SPAdes	100X	82	4757392	234581	75088	7	20
Mut_66	SPAdes	20X	79	4756619	234581	75088	7	20
Mut_66	SPAdes	40X	80	4757203	234581	75088	7	20
Mut_66	SPAdes	60X	80	4757239	234581	75088	7	20
Mut_66	SPAdes	80X	80	4757005	234581	75088	7	20
Mut_67	SKESA	100X	68	4729766	180690	50298	10	28
Mut_67	SKESA	20X	1713	4571706	4488	1304	311	1024
Mut_67	SKESA	40X	192	4703932	46353	16057	31	94
Mut_67	SKESA	60X	82	4725424	148753	45304	13	36
Mut_67	SKESA	80X	75	4728308	168683	48701	11	30
Mut_67	SPAdes	100X	77	4756544	234578	75084	7	20
Mut_67	SPAdes	20X	79	4756767	234578	75084	7	20
Mut_67	SPAdes	40X	74	4756280	234578	75084	7	20
Mut_67	SPAdes	60X	72	4755909	234578	75084	7	20
Mut_67	SPAdes	80X	72	4755909	234578	75084	7	20
Mut_68	SKESA	100X	69	4729348	180692	50299	10	28
Mut_68	SKESA	20X	1670	4577066	4619	1396	316	1013
Mut_68	SKESA	40X	174	4706488	54469	18776	28	85
Mut_68	SKESA	60X	82	4725289	148638	46102	13	35
Mut_68	SKESA	80X	74	4728075	168685	48701	11	30
Mut_68	SPAdes	100X	77	4756545	234579	75086	7	20
Mut_68	SPAdes	20X	78	4756390	219227	75086	8	21
Mut_68	SPAdes	40X	77	4756519	234579	75086	7	20
Mut_68	SPAdes	60X	79	4756799	234579	75086	7	20
Mut_68	SPAdes	80X	77	4756545	234579	75086	7	20
Mut_69	SKESA	100X	67	4730353	183059	50298	10	27
Mut_69	SKESA	20X	1667	4574507	4520	1329	301	987
Mut_69	SKESA	40X	190	4705486	48308	16769	33	90
Mut_69	SKESA	60X	80	4726292	148752	46102	13	35
Mut_69	SKESA	80X	71	4729580	180690	50298	10	28
Mut_69	SPAdes	100X	79	4756954	234580	75085	7	20
Mut_69	SPAdes	20X	83	4756269	191784	65580	8	22
Mut_69	SPAdes	40X	77	4756682	234580	75085	7	20
Mut_69	SPAdes	60X	81	4757208	234580	75085	7	20
Mut_69	SPAdes	80X	79	4756943	234580	75085	7	20
Mut_7	SKESA	100X	69	4729722	180691	50299	10	28
Mut_7	SKESA	20X	1636	4574938	4600	1386	297	977
Mut_7	SKESA	40X	189	4704938	46893	17653	30	91
Mut_7	SKESA	60X	81	4726057	148753	46101	13	35
Mut_7	SKESA	80X	72	4728667	168681	50299	11	29
Mut_7	SPAdes	100X	79	4756813	234580	75086	7	20
Mut_7	SPAdes	20X	77	4756005	234580	75086	7	20
Mut_7	SPAdes	40X	77	4756220	234580	74747	7	20
Mut_7	SPAdes	60X	79	4756813	234580	75086	7	20
Mut_7	SPAdes	80X	79	4756811	234580	75086	7	20
Mut_70	SKESA	100X	68	4729336	180690	50298	10	28
Mut_70	SKESA	20X	1696	4573062	4381	1365	323	1027
Mut_70	SKESA	40X	198	4704158	42458	14254	35	101
Mut_70	SKESA	60X	81	4725197	148754	46103	13	36
Mut_70	SKESA	80X	73	4727762	168684	48701	11	30
Mut_70	SPAdes	100X	74	4756884	249190	119180	7	18
Mut_70	SPAdes	20X	80	4756413	234581	74747	7	20
Mut_70	SPAdes	40X	74	4756870	249177	119180	7	18
Mut_70	SPAdes	60X	74	4756873	249190	119169	7	18
Mut_70	SPAdes	80X	74	4756873	249190	119169	7	18
Mut_71	SKESA	100X	66	4729857	180689	50299	10	28
Mut_71	SKESA	20X	1681	4576027	4601	1322	312	1012
Mut_71	SKESA	40X	189	4704296	46913	15899	32	98
Mut_71	SKESA	60X	82	4725824	148751	46102	13	35
Mut_71	SKESA	80X	71	4727987	168685	48701	11	30
Mut_71	SPAdes	100X	77	4756622	234578	75094	7	20
Mut_71	SPAdes	20X	80	4756309	234578	74900	7	20
Mut_71	SPAdes	40X	80	4756998	234578	75094	7	20
Mut_71	SPAdes	60X	77	4756622	234578	75094	7	20
Mut_71	SPAdes	80X	77	4756620	234578	75094	7	20
Mut_72	SKESA	100X	69	4729467	180692	50298	10	28
Mut_72	SKESA	20X	1704	4572008	4414	1345	316	1029
Mut_72	SKESA	40X	195	4703809	48551	16002	31	100
Mut_72	SKESA	60X	82	4725501	148754	46102	13	35
Mut_72	SKESA	80X	75	4727748	155879	48701	12	31
Mut_72	SPAdes	100X	84	4757691	234578	75086	7	20
Mut_72	SPAdes	20X	73	4755447	234578	65569	7	21
Mut_72	SPAdes	40X	78	4756673	234578	75086	7	20
Mut_72	SPAdes	60X	77	4756544	234578	75086	7	20
Mut_72	SPAdes	80X	79	4756800	234578	75086	7	20
Mut_73	SKESA	100X	68	4729263	180689	50297	10	28
Mut_73	SKESA	20X	1708	4572044	4380	1309	324	1031
Mut_73	SKESA	40X	187	4704059	48310	17328	32	94
Mut_73	SKESA	60X	80	4724976	148754	46102	13	35
Mut_73	SKESA	80X	72	4727437	168682	48703	11	30
Mut_73	SPAdes	100X	79	4756745	234575	75087	7	20
Mut_73	SPAdes	20X	80	4756651	234575	74893	7	20
Mut_73	SPAdes	40X	72	4755869	234575	75087	7	20
Mut_73	SPAdes	60X	79	4756745	234575	75087	7	20
Mut_73	SPAdes	80X	77	4756485	234575	75087	7	20
Mut_74	SKESA	100X	70	4730115	180691	50298	10	28
Mut_74	SKESA	20X	1689	4572463	4583	1335	305	1005
Mut_74	SKESA	40X	192	4704733	48513	15962	29	90
Mut_74	SKESA	60X	86	4725819	148752	44706	13	37
Mut_74	SKESA	80X	75	4728317	168682	48700	11	30
Mut_74	SPAdes	100X	80	4756922	234583	75087	7	20
Mut_74	SPAdes	20X	87	4756749	234583	75087	7	20
Mut_74	SPAdes	40X	79	4756762	234583	75087	7	20
Mut_74	SPAdes	60X	77	4756533	234583	75087	7	20
Mut_74	SPAdes	80X	79	4756795	234583	75087	7	20
Mut_75	SKESA	100X	72	4729694	180691	50295	10	28
Mut_75	SKESA	20X	1729	4572522	4365	1268	320	1034
Mut_75	SKESA	40X	201	4703995	45343	16467	37	104
Mut_75	SKESA	60X	82	4725669	155879	46102	12	34
Mut_75	SKESA	80X	75	4728104	168685	48701	11	30
Mut_75	SPAdes	100X	74	4756157	234580	75087	7	20
Mut_75	SPAdes	20X	80	4755550	191783	75087	8	22
Mut_75	SPAdes	40X	77	4756530	234580	75087	7	20
Mut_75	SPAdes	60X	77	4756538	234580	75087	7	20
Mut_75	SPAdes	80X	74	4756157	234580	75087	7	20
Mut_76	SKESA	100X	68	4729731	180691	50299	10	28
Mut_76	SKESA	20X	1683	4572441	4445	1372	322	1022
Mut_76	SKESA	40X	196	4703708	45046	13814	33	105
Mut_76	SKESA	60X	84	4725395	148753	46101	13	36
Mut_76	SKESA	80X	73	4727487	168681	48702	11	30
Mut_76	SPAdes	100X	73	4756009	234579	75086	7	20
Mut_76	SPAdes	20X	78	4756124	234579	74892	7	20
Mut_76	SPAdes	40X	79	4756873	234579	75086	7	20
Mut_76	SPAdes	60X	77	4756622	234579	75086	7	20
Mut_76	SPAdes	80X	79	4756879	234579	75086	7	20
Mut_77	SKESA	100X	69	4729707	180690	50299	10	28
Mut_77	SKESA	20X	1643	4573243	4570	1388	309	990
Mut_77	SKESA	40X	186	4704699	55499	17649	28	87
Mut_77	SKESA	60X	83	4725029	148752	46103	13	36
Mut_77	SKESA	80X	74	4727823	168683	48701	11	30
Mut_77	SPAdes	100X	66	4754879	234579	75086	7	20
Mut_77	SPAdes	20X	72	4756231	219227	75086	8	21
Mut_77	SPAdes	40X	70	4756282	261126	75086	6	19
Mut_77	SPAdes	60X	69	4756115	261126	75086	6	19
Mut_77	SPAdes	80X	66	4754869	234579	75086	7	20
Mut_78	SKESA	100X	70	4729988	180690	50298	10	28
Mut_78	SKESA	20X	1700	4573839	4512	1321	317	1031
Mut_78	SKESA	40X	182	4706032	54226	17157	27	92
Mut_78	SKESA	60X	82	4726246	133676	46121	13	36
Mut_78	SKESA	80X	74	4728323	168682	48702	11	30
Mut_78	SPAdes	100X	72	4755930	234597	75086	7	20
Mut_78	SPAdes	20X	83	4756605	234597	65616	7	21
Mut_78	SPAdes	40X	72	4755927	234597	75086	7	20
Mut_78	SPAdes	60X	82	4757456	234597	75086	7	20
Mut_78	SPAdes	80X	72	4755929	234597	75086	7	20
Mut_79	SKESA	100X	68	4730017	180689	50299	10	28
Mut_79	SKESA	20X	1668	4580381	4474	1360	316	1010
Mut_79	SKESA	40X	178	4705216	48551	15923	28	89
Mut_79	SKESA	60X	81	4725408	148753	46090	13	36
Mut_79	SKESA	80X	74	4728340	168682	48701	11	30
Mut_79	SPAdes	100X	72	4755887	234576	75085	7	20
Mut_79	SPAdes	20X	83	4756851	234576	74746	7	20
Mut_79	SPAdes	40X	74	4756140	234576	75085	7	20
Mut_79	SPAdes	60X	72	4755887	234576	75085	7	20
Mut_79	SPAdes	80X	72	4755887	234576	75085	7	20
Mut_8	SKESA	100X	72	4731480	183060	50298	9	27
Mut_8	SKESA	20X	1674	4576391	4619	1304	293	994
Mut_8	SKESA	40X	186	4705578	47029	18209	28	91
Mut_8	SKESA	60X	85	4726259	148751	46101	13	35
Mut_8	SKESA	80X	76	4729135	169573	48702	10	29
Mut_8	SPAdes	100X	79	4756747	234578	75085	7	20
Mut_8	SPAdes	20X	76	4755590	234578	75085	7	20
Mut_8	SPAdes	40X	77	4756514	234578	75085	7	20
Mut_8	SPAdes	60X	77	4756532	234578	75085	7	20
Mut_8	SPAdes	80X	84	4757686	234578	75085	7	20
Mut_80	SKESA	100X	70	4729755	180689	50298	10	28
Mut_80	SKESA	20X	1688	4575871	4573	1336	311	1009
Mut_80	SKESA	40X	199	4704092	44071	13550	34	103
Mut_80	SKESA	60X	87	4725746	141293	44707	13	37
Mut_80	SKESA	80X	75	4728477	168683	48701	11	30
Mut_80	SPAdes	100X	73	4755988	234580	75086	7	20
Mut_80	SPAdes	20X	82	4757207	234580	75086	7	20
Mut_80	SPAdes	40X	69	4755474	234580	75086	7	20
Mut_80	SPAdes	60X	71	4755734	234580	75086	7	20
Mut_80	SPAdes	80X	73	4755988	234580	75086	7	20
Mut_81	SKESA	100X	69	4730155	180690	50297	10	27
Mut_81	SKESA	20X	1703	4569939	4389	1330	310	1033
Mut_81	SKESA	40X	197	4704263	49802	14978	34	95
Mut_81	SKESA	60X	86	4725882	133676	46102	13	36
Mut_81	SKESA	80X	73	4728084	180690	48701	10	29
Mut_81	SPAdes	100X	88	4758615	234580	75086	7	20
Mut_81	SPAdes	20X	79	4757364	234580	75086	7	20
Mut_81	SPAdes	40X	89	4758810	234580	75086	7	20
Mut_81	SPAdes	60X	88	4758981	234580	75086	7	20
Mut_81	SPAdes	80X	85	4758376	234580	75086	7	20
Mut_82	SKESA	100X	69	4729101	180690	50298	10	28
Mut_82	SKESA	20X	1697	4573749	4494	1327	315	1014
Mut_82	SKESA	40X	186	4703913	49489	15449	30	90
Mut_82	SKESA	60X	82	4725008	148753	46102	13	35
Mut_82	SKESA	80X	73	4727305	168682	48701	12	31
Mut_82	SPAdes	100X	76	4756415	234581	75086	7	20
Mut_82	SPAdes	20X	82	4756834	234581	75086	7	20
Mut_82	SPAdes	40X	77	4756537	234581	75086	7	20
Mut_82	SPAdes	60X	77	4756509	234581	75086	7	20
Mut_82	SPAdes	80X	84	4757687	234581	75086	7	20
Mut_83	SKESA	100X	71	4729972	180690	50298	10	28
Mut_83	SKESA	20X	1657	4574537	4557	1349	314	1009
Mut_83	SKESA	40X	197	4704364	46120	15781	33	97
Mut_83	SKESA	60X	83	4725561	148753	45305	13	35
Mut_83	SKESA	80X	75	4727742	168683	48701	11	30
Mut_83	SPAdes	100X	81	4757390	234580	75086	7	20
Mut_83	SPAdes	20X	88	4757667	234580	75086	7	20
Mut_83	SPAdes	40X	79	4757193	234580	75086	7	20
Mut_83	SPAdes	60X	81	4757501	234580	75086	7	20
Mut_83	SPAdes	80X	82	4757628	234580	75086	7	20
Mut_84	SKESA	100X	67	4729691	180690	50298	10	28
Mut_84	SKESA	20X	1665	4572998	4655	1349	299	993
Mut_84	SKESA	40X	193	4706563	48308	14403	31	100
Mut_84	SKESA	60X	83	4725576	148753	45305	13	35
Mut_84	SKESA	80X	73	4727845	168685	48701	11	30
Mut_84	SPAdes	100X	72	4755962	234642	75086	7	20
Mut_84	SPAdes	20X	80	4756258	218462	75086	7	21
Mut_84	SPAdes	40X	74	4756213	234579	75086	7	20
Mut_84	SPAdes	60X	78	4756724	234579	75086	7	20
Mut_84	SPAdes	80X	74	4756214	234579	75086	7	20
Mut_85	SKESA	100X	71	4730033	180692	50298	10	28
Mut_85	SKESA	20X	1665	4572589	4506	1406	314	1006
Mut_85	SKESA	40X	191	4704394	46432	15932	33	96
Mut_85	SKESA	60X	85	4725508	133675	46102	13	36
Mut_85	SKESA	80X	75	4728024	168683	48701	11	30
Mut_85	SPAdes	100X	79	4756820	234579	75086	7	20
Mut_85	SPAdes	20X	82	4756512	234579	74747	7	20
Mut_85	SPAdes	40X	82	4757457	234579	75086	7	20
Mut_85	SPAdes	60X	77	4756519	234579	75086	7	20
Mut_85	SPAdes	80X	79	4756799	234579	75086	7	20
Mut_86	SKESA	100X	68	4729590	183058	54227	10	27
Mut_86	SKESA	20X	1661	4570536	4670	1347	309	999
Mut_86	SKESA	40X	204	4703319	45448	13123	31	99
Mut_86	SKESA	60X	83	4725249	148753	46102	13	35
Mut_86	SKESA	80X	74	4727326	168683	48620	11	30
Mut_86	SPAdes	100X	71	4755452	234579	75086	7	20
Mut_86	SPAdes	20X	73	4754453	234579	65617	7	21
Mut_86	SPAdes	40X	71	4755560	234579	75086	7	20
Mut_86	SPAdes	60X	69	4755295	234579	75086	7	20
Mut_86	SPAdes	80X	71	4755452	234579	75086	7	20
Mut_87	SKESA	100X	67	4728797	180690	50298	10	28
Mut_87	SKESA	20X	1684	4575178	4412	1338	314	1024
Mut_87	SKESA	40X	189	4703835	45342	15138	31	99
Mut_87	SKESA	60X	80	4724610	148756	46101	13	35
Mut_87	SKESA	80X	71	4726972	168683	48701	11	30
Mut_87	SPAdes	100X	79	4756887	234576	75086	7	20
Mut_87	SPAdes	20X	87	4757642	234576	75086	7	20
Mut_87	SPAdes	40X	77	4756607	234576	75086	7	20
Mut_87	SPAdes	60X	80	4756990	234576	75086	7	20
Mut_87	SPAdes	80X	80	4757013	234576	75086	7	20
Mut_88	SKESA	100X	72	4730014	180688	50298	10	28
Mut_88	SKESA	20X	1692	4573179	4445	1293	319	1024
Mut_88	SKESA	40X	203	4703676	45170	13605	33	99
Mut_88	SKESA	60X	85	4725712	148753	45305	13	35
Mut_88	SKESA	80X	76	4727894	168680	48702	11	30
Mut_88	SPAdes	100X	79	4756745	234578	75086	7	20
Mut_88	SPAdes	20X	79	4756763	234578	75086	7	20
Mut_88	SPAdes	40X	77	4756539	234578	75086	7	20
Mut_88	SPAdes	60X	81	4757052	234578	75086	7	20
Mut_88	SPAdes	80X	79	4756796	234578	75086	7	20
Mut_89	SKESA	100X	68	4729823	180691	54226	10	27
Mut_89	SKESA	20X	1711	4571687	4367	1307	321	1045
Mut_89	SKESA	40X	200	4704614	46213	15968	35	102
Mut_89	SKESA	60X	82	4725380	148752	45305	13	36
Mut_89	SKESA	80X	73	4727906	168683	48701	11	30
Mut_89	SPAdes	100X	74	4756352	234581	75085	7	20
Mut_89	SPAdes	20X	81	4756100	234581	74891	7	20
Mut_89	SPAdes	40X	72	4756093	234581	75085	7	20
Mut_89	SPAdes	60X	74	4756347	234581	75085	7	20
Mut_89	SPAdes	80X	74	4756345	234581	75085	7	20
Mut_9	SKESA	100X	68	4729519	181012	50299	10	28
Mut_9	SKESA	20X	1656	4574816	4461	1358	306	994
Mut_9	SKESA	40X	211	4703672	43629	14090	38	112
Mut_9	SKESA	60X	82	4725621	148753	46103	13	35
Mut_9	SKESA	80X	74	4728220	168684	48701	11	30
Mut_9	SPAdes	100X	80	4757233	234579	75086	7	20
Mut_9	SPAdes	20X	76	4756175	234579	75086	7	20
Mut_9	SPAdes	40X	78	4756979	234579	75086	7	20
Mut_9	SPAdes	60X	78	4756979	234579	75086	7	20
Mut_9	SPAdes	80X	78	4756979	234579	75086	7	20
Mut_90	SKESA	100X	70	4730425	180690	50298	10	28
Mut_90	SKESA	20X	1671	4572756	4545	1338	296	993
Mut_90	SKESA	40X	179	4705015	49303	17654	31	92
Mut_90	SKESA	60X	82	4725681	148752	46102	13	35
Mut_90	SKESA	80X	74	4728395	168683	48701	11	30
Mut_90	SPAdes	100X	79	4756836	234579	75093	7	20
Mut_90	SPAdes	20X	83	4756932	234579	79014	7	20
Mut_90	SPAdes	40X	79	4756811	234579	75093	7	20
Mut_90	SPAdes	60X	81	4757068	234579	75093	7	20
Mut_90	SPAdes	80X	76	4756455	234579	75093	7	20
Mut_91	SKESA	100X	72	4729789	180689	50298	10	28
Mut_91	SKESA	20X	1634	4576496	4659	1385	305	976
Mut_91	SKESA	40X	193	4704673	51535	15635	27	91
Mut_91	SKESA	60X	87	4725729	148754	45305	12	36
Mut_91	SKESA	80X	76	4728060	168682	48701	11	30
Mut_91	SPAdes	100X	76	4756490	234578	75086	7	20
Mut_91	SPAdes	20X	76	4756436	218461	74892	7	21
Mut_91	SPAdes	40X	76	4756483	234578	75086	7	20
Mut_91	SPAdes	60X	76	4756483	234578	75086	7	20
Mut_91	SPAdes	80X	76	4756490	234578	75086	7	20
Mut_92	SKESA	100X	69	4729974	183059	50298	10	27
Mut_92	SKESA	20X	1636	4579538	4634	1386	314	981
Mut_92	SKESA	40X	194	4704534	48066	15286	31	97
Mut_92	SKESA	60X	83	4725726	148753	46103	13	36
Mut_92	SKESA	80X	74	4728407	180691	48700	10	29
Mut_92	SPAdes	100X	79	4756581	234580	75085	7	20
Mut_92	SPAdes	20X	88	4757684	234580	75085	7	20
Mut_92	SPAdes	40X	84	4757448	234580	75085	7	20
Mut_92	SPAdes	60X	77	4756527	234580	75085	7	20
Mut_92	SPAdes	80X	79	4756581	234580	75085	7	20
Mut_93	SKESA	100X	69	4729535	180691	50384	10	28
Mut_93	SKESA	20X	1640	4578391	4668	1423	302	983
Mut_93	SKESA	40X	198	4704527	46213	18079	34	99
Mut_93	SKESA	60X	83	4725611	148753	46102	13	35
Mut_93	SKESA	80X	74	4727912	168683	48701	11	30
Mut_93	SPAdes	100X	79	4756872	234576	75087	7	20
Mut_93	SPAdes	20X	86	4757203	234576	74748	7	20
Mut_93	SPAdes	40X	85	4757872	234576	75087	7	20
Mut_93	SPAdes	60X	79	4756842	234576	75087	7	20
Mut_93	SPAdes	80X	77	4756618	234576	75087	7	20
Mut_94	SKESA	100X	69	4729262	180689	50298	10	28
Mut_94	SKESA	20X	1675	4573588	4595	1336	304	1001
Mut_94	SKESA	40X	195	4703957	45448	15316	36	105
Mut_94	SKESA	60X	81	4724951	148753	46102	13	35
Mut_94	SKESA	80X	75	4727624	155878	48699	11	31
Mut_94	SPAdes	100X	79	4756827	234578	75087	7	20
Mut_94	SPAdes	20X	72	4755033	247462	75087	7	19
Mut_94	SPAdes	40X	83	4757251	234578	74748	7	20
Mut_94	SPAdes	60X	76	4756445	234578	75087	7	20
Mut_94	SPAdes	80X	74	4756192	234578	75087	7	20
Mut_95	SKESA	100X	71	4730265	180690	50298	10	28
Mut_95	SKESA	20X	1687	4571235	4322	1382	319	1026
Mut_95	SKESA	40X	178	4705010	54469	17061	27	85
Mut_95	SKESA	60X	83	4725589	148752	46102	13	35
Mut_95	SKESA	80X	75	4728298	168684	48701	11	30
Mut_95	SPAdes	100X	81	4757438	234577	75086	7	20
Mut_95	SPAdes	20X	77	4756983	234577	75086	7	20
Mut_95	SPAdes	40X	79	4757171	234577	75086	7	20
Mut_95	SPAdes	60X	79	4757176	234577	75086	7	20
Mut_95	SPAdes	80X	79	4757032	234577	75086	7	20
Mut_96	SKESA	100X	65	4729807	183062	54228	10	27
Mut_96	SKESA	20X	1666	4572742	4412	1371	322	1008
Mut_96	SKESA	40X	197	4705086	46893	14934	31	97
Mut_96	SKESA	60X	81	4725755	148753	45305	13	36
Mut_96	SKESA	80X	69	4727983	169572	50298	11	29
Mut_96	SPAdes	100X	83	4757548	234579	75086	7	20
Mut_96	SPAdes	20X	75	4756252	234579	74892	7	20
Mut_96	SPAdes	40X	77	4756506	234579	75086	7	20
Mut_96	SPAdes	60X	85	4757916	234579	75086	7	20
Mut_96	SPAdes	80X	79	4756784	234579	75086	7	20
Mut_97	SKESA	100X	70	4729496	180692	50298	10	28
Mut_97	SKESA	20X	1685	4571777	4520	1355	321	1023
Mut_97	SKESA	40X	192	4704066	46893	14898	31	92
Mut_97	SKESA	60X	85	4725961	148753	46101	13	35
Mut_97	SKESA	80X	76	4727632	168684	48701	11	30
Mut_97	SPAdes	100X	75	4756633	234578	75086	7	20
Mut_97	SPAdes	20X	79	4756961	234578	75086	7	20
Mut_97	SPAdes	40X	77	4757031	234578	75086	7	20
Mut_97	SPAdes	60X	77	4756887	234578	75086	7	20
Mut_97	SPAdes	80X	77	4756681	234578	75086	7	20
Mut_98	SKESA	100X	69	4729197	180690	50298	10	28
Mut_98	SKESA	20X	1662	4573139	4510	1370	317	1000
Mut_98	SKESA	40X	185	4704139	51536	17748	31	93
Mut_98	SKESA	60X	81	4724968	133676	45306	13	36
Mut_98	SKESA	80X	74	4727926	168682	48700	11	30
Mut_98	SPAdes	100X	81	4757462	234579	75086	7	20
Mut_98	SPAdes	20X	70	4755808	234579	75086	7	20
Mut_98	SPAdes	40X	71	4756163	234579	75086	7	20
Mut_98	SPAdes	60X	74	4756545	234579	75086	7	20
Mut_98	SPAdes	80X	74	4756544	234579	75086	7	20
Mut_99	SKESA	100X	68	4729142	180690	50298	10	28
Mut_99	SKESA	20X	1684	4567677	4598	1329	320	1019
Mut_99	SKESA	40X	181	4703954	48001	15912	30	94
Mut_99	SKESA	60X	80	4724874	148755	46102	13	35
Mut_99	SKESA	80X	73	4727356	168682	48701	11	30
Mut_99	SPAdes	100X	78	4756923	234579	75085	7	20
Mut_99	SPAdes	20X	78	4756496	234579	74891	7	20
Mut_99	SPAdes	40X	77	4756533	234579	75085	7	20
Mut_99	SPAdes	60X	72	4755901	234579	75085	7	20
Mut_99	SPAdes	80X	78	4756923	234579	75085	7	20

## Sheet: Table S5
			Reference screening results for SPAdes and SKESA simulated mutant assemblies
Dataset	Isolate_ID	Assembler	Screen_Category	Raw_SNPs	CSP2_Screen_SNPs	Query_Percent_Aligned	Reference_Percent_Aligned	Purged_Length	Purged_Identity	Purged_LengthIdentity	Purged_Invalid	Purged_Indel	Purged_Duplicate	Purged_Het	Purged_Density	Filtered_Query_Edge	Filtered_Ref_Edge	Filtered_Both_Edge	Kmer_Similarity	Shared_Kmers	Query_Unique_Kmers	Reference_Unique_Kmers	MUMmer_gSNPs	MUMmer_gIndels
100X	Mut_0	SKESA	Pass	297	296	99.9	98.47	0	0	0	0	39	0	0	0	1	0	0	99.26	4707603	10354	24667	295	39
100X	Mut_0	SPAdes	Pass	328	300	99.83	98.94	0	0	0	0	46	0	0	27	1	0	0	99.51	4719353	10384	12917	306	40
20X	Mut_0	SKESA	Pass	288	225	98.17	93.56	5	0	0	0	38	0	0	0	58	0	0	95.17	4513031	9899	219239	280	35
20X	Mut_0	SPAdes	Pass	342	307	99.84	98.93	0	0	0	0	46	0	0	32	3	0	0	99.5	4718824	10445	13446	317	40
40X	Mut_0	SKESA	Pass	300	287	99.85	97.87	1	0	0	0	72	0	0	4	8	0	0	98.78	4684511	10323	47759	295	39
40X	Mut_0	SPAdes	Pass	323	300	99.84	98.93	0	0	0	0	46	0	0	21	2	0	0	99.51	4719342	10384	12928	302	40
60X	Mut_0	SKESA	Pass	296	291	99.91	98.38	0	0	0	0	39	0	0	0	5	0	0	99.2	4704466	10323	27804	294	39
60X	Mut_0	SPAdes	Pass	326	301	99.84	98.93	0	0	0	0	46	0	0	22	3	0	0	99.51	4719346	10384	12924	306	40
80X	Mut_0	SKESA	Pass	296	293	99.89	98.42	0	0	0	0	39	0	0	0	3	0	0	99.24	4706389	10323	25881	294	39
80X	Mut_0	SPAdes	Pass	332	300	99.83	98.94	0	0	0	0	46	0	0	29	3	0	0	99.51	4719353	10384	12917	310	40
100X	Mut_1	SKESA	Pass	295	291	99.89	98.46	0	0	0	0	40	0	0	0	4	0	0	99.26	4707370	10314	24900	294	40
100X	Mut_1	SPAdes	Pass	327	299	99.83	98.94	0	0	0	0	46	0	0	22	6	0	0	99.51	4719393	10401	12877	308	40
20X	Mut_1	SKESA	Pass	287	223	98.24	93.68	6	0	0	0	37	0	0	0	60	0	0	95.22	4515358	9949	216912	282	39
20X	Mut_1	SPAdes	Pass	335	303	99.83	98.93	1	0	0	0	46	0	0	25	6	0	0	99.5	4719039	10446	13231	310	40
40X	Mut_1	SKESA	Pass	293	278	99.87	97.9	0	0	0	0	40	0	0	0	15	0	0	98.8	4685499	10216	46771	290	40
40X	Mut_1	SPAdes	Pass	328	299	99.84	98.93	0	0	0	0	46	0	0	26	3	0	0	99.51	4719382	10401	12888	308	40
60X	Mut_1	SKESA	Pass	295	289	99.88	98.36	0	0	0	0	40	0	0	0	6	0	0	99.2	4704837	10314	27433	294	40
60X	Mut_1	SPAdes	Pass	323	300	99.84	98.94	0	0	0	0	46	0	0	18	5	0	0	99.51	4719393	10401	12877	308	40
80X	Mut_1	SKESA	Pass	295	290	99.89	98.42	0	0	0	0	40	0	0	0	5	0	0	99.24	4706425	10314	25845	294	40
80X	Mut_1	SPAdes	Pass	328	299	99.83	98.94	0	0	0	0	46	0	0	24	5	0	0	99.51	4719393	10401	12877	309	40
100X	Mut_10	SKESA	Pass	290	285	99.89	98.47	0	0	0	0	39	0	0	2	3	0	0	99.28	4708139	10138	24131	288	39
100X	Mut_10	SPAdes	Pass	324	286	99.85	98.94	1	0	0	0	45	0	0	30	7	0	0	99.52	4719627	10262	12643	302	39
20X	Mut_10	SKESA	Pass	284	219	98.19	93.6	5	0	0	0	37	0	0	2	58	0	0	95.22	4515238	9664	217032	272	37
20X	Mut_10	SPAdes	Pass	338	290	99.83	98.95	0	0	0	0	48	0	0	44	4	0	0	99.51	4719006	10200	13264	304	39
40X	Mut_10	SKESA	Pass	293	282	99.85	97.9	0	0	0	0	72	0	0	6	5	0	0	98.81	4686038	10070	46232	287	38
40X	Mut_10	SPAdes	Pass	323	291	99.85	98.94	1	0	0	0	45	0	0	24	7	0	0	99.52	4719612	10262	12658	299	39
60X	Mut_10	SKESA	Pass	288	283	99.89	98.37	0	0	0	0	39	0	0	2	3	0	0	99.21	4704837	10042	27433	285	38
60X	Mut_10	SPAdes	Pass	329	290	99.83	98.94	1	0	0	0	45	0	0	31	7	0	0	99.52	4719627	10262	12643	306	39
80X	Mut_10	SKESA	Pass	290	284	99.89	98.43	0	0	0	0	39	0	0	2	4	0	0	99.25	4706965	10117	25305	287	39
80X	Mut_10	SPAdes	Pass	330	286	99.85	98.94	1	0	0	0	45	0	0	37	6	0	0	99.52	4719612	10262	12658	308	39
100X	Mut_11	SKESA	Pass	293	287	99.9	98.46	0	0	0	0	39	0	0	6	0	0	0	99.26	4707293	10222	24977	289	39
100X	Mut_11	SPAdes	Pass	338	292	99.83	98.93	3	0	0	0	46	0	0	37	6	0	0	99.51	4719293	10346	12977	310	40
20X	Mut_11	SKESA	Pass	291	225	98.06	93.42	9	0	0	0	36	0	0	6	54	0	0	95.14	4511894	9989	220376	281	38
20X	Mut_11	SPAdes	Pass	337	294	99.82	98.93	1	0	0	0	46	0	0	38	4	0	0	99.5	4719033	10421	13237	307	40
40X	Mut_11	SKESA	Pass	295	283	99.88	97.91	0	0	0	0	72	0	0	11	1	0	0	98.8	4685414	10125	46856	288	39
40X	Mut_11	SPAdes	Pass	317	293	99.81	98.92	0	0	0	0	46	0	0	19	5	0	0	99.51	4719445	10377	12825	300	40
60X	Mut_11	SKESA	Pass	294	288	99.89	98.39	0	0	0	0	39	0	0	6	0	0	0	99.22	4705398	10253	26872	290	39
60X	Mut_11	SPAdes	Pass	338	293	99.84	98.93	0	0	0	0	46	0	0	37	8	0	0	99.51	4719324	10346	12946	311	40
80X	Mut_11	SKESA	Pass	293	287	99.9	98.42	0	0	0	0	39	0	0	6	0	0	0	99.23	4706238	10251	26032	289	39
80X	Mut_11	SPAdes	Pass	334	292	99.83	98.93	3	0	0	0	46	0	0	33	6	0	0	99.51	4719257	10377	13013	308	40
100X	Mut_12	SKESA	Pass	299	299	99.88	98.46	0	0	0	0	39	0	0	0	0	0	0	99.26	4707486	10437	24784	299	39
100X	Mut_12	SPAdes	Pass	330	299	99.81	98.93	0	0	0	0	45	0	0	27	4	0	0	99.51	4719277	10468	12993	311	39
20X	Mut_12	SKESA	Pass	302	228	98.12	93.49	4	0	0	0	34	0	0	3	69	0	0	95.13	4511687	10246	220583	296	35
20X	Mut_12	SPAdes	Pass	344	305	99.82	98.93	0	0	0	0	45	0	0	35	4	0	0	99.5	4718992	10550	13278	323	39
40X	Mut_12	SKESA	Pass	300	294	99.85	97.89	0	0	0	0	39	0	0	0	6	0	0	98.79	4685305	10461	46965	300	39
40X	Mut_12	SPAdes	Pass	338	300	99.84	98.93	0	0	0	0	46	0	0	32	6	0	0	99.5	4719170	10498	13100	316	40
60X	Mut_12	SKESA	Pass	299	298	99.87	98.34	0	0	0	0	39	0	0	0	1	0	0	99.19	4704115	10437	28155	299	39
60X	Mut_12	SPAdes	Pass	322	302	99.83	98.93	0	0	0	0	45	0	0	17	3	0	0	99.51	4719246	10437	13024	305	39
80X	Mut_12	SKESA	Pass	299	298	99.89	98.42	0	0	0	0	39	0	0	0	1	0	0	99.23	4706370	10437	25900	299	39
80X	Mut_12	SPAdes	Pass	329	299	99.84	98.93	0	0	0	0	45	0	0	27	3	0	0	99.5	4719200	10471	13070	310	39
100X	Mut_13	SKESA	Pass	298	296	99.9	98.47	0	0	0	0	39	0	0	0	2	0	0	99.26	4707502	10399	24768	298	39
100X	Mut_13	SPAdes	Pass	320	299	99.83	98.93	0	0	0	0	45	0	0	17	4	0	0	99.51	4719206	10399	13064	307	39
20X	Mut_13	SKESA	Pass	290	224	98.2	93.61	3	0	0	0	39	0	0	0	63	0	0	95.2	4514566	10049	217704	285	39
20X	Mut_13	SPAdes	Pass	341	302	99.84	98.92	0	0	0	0	45	0	0	35	4	0	0	99.5	4718993	10490	13277	311	39
40X	Mut_13	SKESA	Pass	298	290	99.87	97.91	0	0	0	0	39	0	0	0	8	0	0	98.8	4685775	10399	46495	298	39
40X	Mut_13	SPAdes	Pass	331	300	99.84	98.93	0	0	0	0	45	0	0	26	5	0	0	99.51	4719308	10399	12962	313	39
60X	Mut_13	SKESA	Pass	298	294	99.89	98.38	0	0	0	0	39	0	0	0	4	0	0	99.21	4704981	10399	27289	298	39
60X	Mut_13	SPAdes	Pass	333	299	99.83	98.93	0	0	0	0	45	0	0	30	4	0	0	99.51	4719285	10399	12985	311	39
80X	Mut_13	SKESA	Pass	298	296	99.89	98.42	0	0	0	0	39	0	0	0	2	0	0	99.24	4706738	10399	25532	298	39
80X	Mut_13	SPAdes	Pass	328	299	99.83	98.93	0	0	0	0	45	0	0	26	3	0	0	99.51	4719206	10399	13064	310	39
100X	Mut_14	SKESA	Pass	294	290	99.89	98.44	1	0	0	0	39	0	0	0	3	0	0	99.25	4706940	10275	25330	294	39
100X	Mut_14	SPAdes	Pass	325	293	99.84	98.94	2	0	0	0	45	0	0	24	6	0	0	99.51	4719584	10368	12686	306	39
20X	Mut_14	SKESA	Pass	279	199	98.22	93.58	7	0	0	0	37	0	0	0	74	0	0	95.14	4511503	9732	220767	277	38
20X	Mut_14	SPAdes	Pass	328	298	99.84	98.93	2	0	0	0	45	0	0	22	6	0	0	99.5	4719190	10470	13080	309	39
40X	Mut_14	SKESA	Pass	299	285	99.87	97.89	0	0	0	0	72	0	0	4	10	0	0	98.78	4684728	10283	47542	295	39
40X	Mut_14	SPAdes	Pass	315	293	99.84	98.94	2	0	0	0	45	0	0	13	7	0	0	99.51	4719575	10368	12695	302	39
60X	Mut_14	SKESA	Pass	294	290	99.87	98.35	1	0	0	0	39	0	0	0	3	0	0	99.2	4704607	10275	27663	294	39
60X	Mut_14	SPAdes	Pass	325	293	99.84	98.94	2	0	0	0	45	0	0	24	6	0	0	99.51	4719579	10368	12691	306	39
80X	Mut_14	SKESA	Pass	294	290	99.9	98.42	1	0	0	0	39	0	0	0	3	0	0	99.23	4706254	10275	26016	294	39
80X	Mut_14	SPAdes	Pass	328	294	99.84	98.94	2	0	0	0	45	0	0	24	8	0	0	99.51	4719556	10368	12714	309	39
100X	Mut_15	SKESA	Pass	288	288	99.91	98.47	0	0	0	0	40	0	0	0	0	0	0	99.25	4707014	10118	25256	288	40
100X	Mut_15	SPAdes	Pass	322	292	99.83	98.94	1	0	0	0	46	0	0	23	6	0	0	99.51	4719493	10228	12777	304	40
20X	Mut_15	SKESA	Pass	283	221	98.17	93.58	5	0	0	0	40	0	0	0	57	0	0	95.2	4514558	9876	217712	279	40
20X	Mut_15	SPAdes	Pass	330	294	99.82	98.91	1	0	0	0	46	0	0	29	6	0	0	99.5	4718966	10226	13304	300	40
40X	Mut_15	SKESA	Pass	289	285	99.88	97.91	0	0	0	0	40	0	0	0	4	0	0	98.8	4685696	10149	46574	289	40
40X	Mut_15	SPAdes	Pass	318	292	99.79	98.92	1	0	0	0	46	0	0	23	2	0	0	99.52	4719555	10211	12715	301	40
60X	Mut_15	SKESA	Pass	288	286	99.91	98.37	0	0	0	0	40	0	0	0	2	0	0	99.2	4704263	10118	28007	288	40
60X	Mut_15	SPAdes	Pass	320	292	99.83	98.94	1	0	0	0	46	0	0	23	4	0	0	99.51	4719493	10228	12777	302	40
80X	Mut_15	SKESA	Pass	288	287	99.91	98.43	0	0	0	0	40	0	0	0	1	0	0	99.23	4706052	10118	26218	288	40
80X	Mut_15	SPAdes	Pass	320	292	99.83	98.94	1	0	0	0	46	0	0	23	4	0	0	99.51	4719463	10231	12807	301	40
100X	Mut_16	SKESA	Pass	295	293	99.85	98.41	0	0	0	0	37	0	0	0	2	0	0	99.25	4707058	10271	25212	295	37
100X	Mut_16	SPAdes	Pass	327	297	99.85	98.93	0	0	0	0	43	0	0	26	4	0	0	99.51	4719372	10302	12898	305	37
20X	Mut_16	SKESA	Pass	290	224	98.08	93.43	5	0	0	0	35	0	0	0	61	0	0	95.12	4510536	9918	221734	284	35
20X	Mut_16	SPAdes	Pass	329	297	99.88	98.94	1	0	0	0	45	0	0	27	4	0	0	99.51	4719255	10302	13015	305	39
40X	Mut_16	SKESA	Pass	296	289	99.8	97.85	4	0	0	0	36	0	0	0	4	0	0	98.81	4685956	10251	46314	295	37
40X	Mut_16	SPAdes	Pass	331	297	99.81	98.91	0	0	0	0	45	0	0	29	5	0	0	99.51	4719440	10333	12830	312	39
60X	Mut_16	SKESA	Pass	295	292	99.83	98.3	0	0	0	0	37	0	0	0	3	0	0	99.19	4704174	10271	28096	295	37
60X	Mut_16	SPAdes	Pass	331	296	99.85	98.93	0	0	0	0	45	0	0	30	5	0	0	99.51	4719439	10333	12831	309	39
80X	Mut_16	SKESA	Pass	295	292	99.85	98.38	0	0	0	0	37	0	0	0	3	0	0	99.24	4706326	10271	25944	295	37
80X	Mut_16	SPAdes	Pass	331	296	99.85	98.93	0	0	0	0	45	0	0	31	4	0	0	99.51	4719443	10334	12827	309	39
100X	Mut_17	SKESA	Pass	294	289	99.89	98.45	0	0	0	0	39	0	0	0	5	0	0	99.25	4707203	10267	25067	294	39
100X	Mut_17	SPAdes	Pass	322	295	99.85	98.94	0	0	0	0	45	0	0	18	9	0	0	99.51	4719499	10329	12771	307	39
20X	Mut_17	SKESA	Pass	282	217	98.23	93.62	4	0	0	0	38	0	0	0	61	0	0	95.19	4513829	9845	218441	282	38
20X	Mut_17	SPAdes	Pass	328	298	99.84	98.92	0	0	0	0	45	0	0	21	9	0	0	99.5	4718805	10405	13465	308	39
40X	Mut_17	SKESA	Pass	298	282	99.86	97.92	2	0	0	0	72	0	0	4	10	0	0	98.82	4686463	10205	45807	294	39
40X	Mut_17	SPAdes	Pass	325	296	99.84	98.94	0	0	0	0	45	0	0	23	6	0	0	99.51	4719459	10359	12811	306	39
60X	Mut_17	SKESA	Pass	293	287	99.89	98.36	0	0	0	0	39	0	0	0	6	0	0	99.2	4704705	10236	27565	293	39
60X	Mut_17	SPAdes	Pass	332	295	99.84	98.94	0	0	0	0	45	0	0	27	10	0	0	99.51	4719481	10329	12789	308	39
80X	Mut_17	SKESA	Pass	294	289	99.89	98.42	0	0	0	0	39	0	0	0	5	0	0	99.24	4706272	10267	25998	294	39
80X	Mut_17	SPAdes	Pass	328	295	99.85	98.94	0	0	0	0	45	0	0	24	9	0	0	99.51	4719499	10329	12771	309	39
100X	Mut_18	SKESA	Pass	293	292	99.9	98.47	0	0	0	0	40	0	0	0	1	0	0	99.26	4707555	10275	24715	293	40
100X	Mut_18	SPAdes	Pass	328	297	99.83	98.93	0	0	0	0	46	0	0	26	5	0	0	99.51	4719323	10337	12947	308	40
20X	Mut_18	SKESA	Pass	286	212	98.24	93.61	6	0	0	0	37	0	0	0	69	0	0	95.17	4512962	9930	219308	284	37
20X	Mut_18	SPAdes	Pass	327	297	99.82	98.92	1	0	0	0	46	0	0	26	3	0	0	99.5	4719047	10337	13223	306	40
40X	Mut_18	SKESA	Pass	293	288	99.82	97.86	1	0	0	0	40	0	0	0	4	0	0	98.8	4685469	10241	46801	292	40
40X	Mut_18	SPAdes	Pass	330	298	99.84	98.93	0	0	0	0	46	0	0	27	5	0	0	99.51	4719490	10337	12780	311	40
60X	Mut_18	SKESA	Pass	292	290	99.88	98.36	0	0	0	0	40	0	0	0	2	0	0	99.2	4704596	10244	27674	292	40
60X	Mut_18	SPAdes	Pass	329	299	99.84	98.93	0	0	0	0	46	0	0	24	6	0	0	99.51	4719315	10337	12955	311	40
80X	Mut_18	SKESA	Pass	292	291	99.89	98.42	0	0	0	0	40	0	0	0	1	0	0	99.24	4706583	10244	25687	292	40
80X	Mut_18	SPAdes	Pass	330	298	99.83	98.93	0	0	0	0	46	0	0	28	4	0	0	99.51	4719323	10337	12947	310	40
100X	Mut_19	SKESA	Pass	296	292	99.9	98.47	0	0	0	0	40	0	0	2	2	0	0	99.26	4707575	10315	24695	292	40
100X	Mut_19	SPAdes	Pass	328	295	99.81	98.93	0	0	0	0	46	0	0	28	5	0	0	99.51	4719406	10419	12864	306	40
20X	Mut_19	SKESA	Pass	287	224	98.25	93.65	3	0	0	0	38	0	0	2	58	0	0	95.17	4513211	9863	219059	278	38
20X	Mut_19	SPAdes	Pass	335	296	99.82	98.94	0	0	0	0	46	0	0	32	7	0	0	99.5	4719084	10389	13186	306	40
40X	Mut_19	SKESA	Pass	296	286	99.85	97.9	0	0	0	0	40	0	0	2	8	0	0	98.81	4686220	10315	46050	292	40
40X	Mut_19	SPAdes	Pass	328	295	99.84	98.93	0	0	0	0	46	0	0	27	6	0	0	99.51	4719288	10411	12982	305	40
60X	Mut_19	SKESA	Pass	295	291	99.89	98.38	0	0	0	0	40	0	0	2	2	0	0	99.21	4705286	10284	26984	291	40
60X	Mut_19	SPAdes	Pass	323	295	99.81	98.93	0	0	0	0	46	0	0	23	5	0	0	99.51	4719424	10401	12846	302	40
80X	Mut_19	SKESA	Pass	296	292	99.9	98.44	0	0	0	0	40	0	0	2	2	0	0	99.25	4706883	10315	25387	292	40
80X	Mut_19	SPAdes	Pass	330	294	99.81	98.93	0	0	0	0	46	0	0	31	5	0	0	99.51	4719437	10388	12833	308	40
100X	Mut_2	SKESA	Pass	294	291	99.88	98.48	0	0	0	0	39	0	0	0	3	0	0	99.28	4708491	10257	23779	292	39
100X	Mut_2	SPAdes	Pass	327	295	99.82	98.93	0	0	0	0	45	0	0	29	3	0	0	99.52	4719645	10257	12625	302	39
20X	Mut_2	SKESA	Pass	275	205	98.16	93.6	2	0	0	0	38	0	0	0	69	0	0	95.23	4515715	9571	216555	270	39
20X	Mut_2	SPAdes	Pass	332	298	99.78	98.91	0	0	0	0	43	0	0	31	3	0	0	99.51	4719516	10288	12754	304	39
40X	Mut_2	SKESA	Pass	294	282	99.84	97.87	1	0	0	0	72	0	0	4	7	0	0	98.8	4685280	10133	46990	289	39
40X	Mut_2	SPAdes	Pass	323	295	99.83	98.93	0	0	0	0	46	0	0	23	5	0	0	99.51	4719558	10300	12712	300	40
60X	Mut_2	SKESA	Pass	293	290	99.86	98.34	0	0	0	0	39	0	0	0	3	0	0	99.2	4704629	10226	27641	291	39
60X	Mut_2	SPAdes	Pass	321	295	99.83	98.93	0	0	0	0	46	0	0	24	2	0	0	99.51	4719573	10318	12697	303	40
80X	Mut_2	SKESA	Pass	294	291	99.87	98.42	0	0	0	0	39	0	0	0	3	0	0	99.25	4707132	10257	25138	292	39
80X	Mut_2	SPAdes	Pass	317	297	99.81	98.91	0	0	0	0	46	0	0	18	2	0	0	99.51	4719458	10287	12812	301	40
100X	Mut_20	SKESA	Pass	294	291	99.89	98.46	0	0	0	0	39	0	0	2	1	0	0	99.26	4707629	10261	24641	292	39
100X	Mut_20	SPAdes	Pass	323	295	99.84	98.93	0	0	0	0	45	0	0	26	2	0	0	99.51	4719449	10264	12821	302	39
20X	Mut_20	SKESA	Pass	291	235	98.28	93.6	2	0	0	0	36	0	0	2	53	0	0	95.1	4509790	10097	222480	288	37
20X	Mut_20	SPAdes	Pass	331	298	99.79	98.91	0	0	0	0	45	0	0	29	4	0	0	99.51	4719306	10377	12964	308	39
40X	Mut_20	SKESA	Pass	294	288	99.85	97.9	0	0	0	0	39	0	0	2	4	0	0	98.8	4685854	10261	46416	292	39
40X	Mut_20	SPAdes	Pass	328	295	99.84	98.93	0	0	0	0	46	0	0	30	3	0	0	99.51	4719418	10294	12852	300	40
60X	Mut_20	SKESA	Pass	294	291	99.89	98.36	0	0	0	0	39	0	0	2	1	0	0	99.2	4704680	10261	27590	292	39
60X	Mut_20	SPAdes	Pass	323	295	99.85	98.93	0	0	0	0	45	0	0	26	2	0	0	99.51	4719449	10264	12821	302	39
80X	Mut_20	SKESA	Pass	294	291	99.88	98.42	0	0	0	0	39	0	0	2	1	0	0	99.25	4707094	10261	25176	292	39
80X	Mut_20	SPAdes	Pass	321	295	99.84	98.93	0	0	0	0	46	0	0	24	2	0	0	99.51	4719418	10294	12852	300	40
100X	Mut_21	SKESA	Pass	294	291	99.88	98.46	0	0	0	0	40	0	0	0	3	0	0	99.27	4707848	10299	24422	294	40
100X	Mut_21	SPAdes	Pass	334	296	99.81	98.94	0	0	0	0	46	0	0	33	5	0	0	99.51	4719325	10338	12945	309	40
20X	Mut_21	SKESA	Pass	292	224	98.25	93.72	3	0	0	0	39	0	0	0	65	0	0	95.27	4517812	10057	214458	286	38
20X	Mut_21	SPAdes	Pass	321	291	99.82	98.94	0	0	0	0	46	0	0	27	3	0	0	99.5	4719150	10362	13120	304	40
40X	Mut_21	SKESA	Pass	290	285	99.85	97.89	0	0	0	0	40	0	0	0	5	0	0	98.79	4685047	10181	47223	290	40
40X	Mut_21	SPAdes	Pass	328	296	99.82	98.93	0	0	0	0	46	0	0	28	4	0	0	99.51	4719450	10338	12820	305	40
60X	Mut_21	SKESA	Pass	292	289	99.87	98.36	0	0	0	0	40	0	0	0	3	0	0	99.21	4704911	10238	27359	292	40
60X	Mut_21	SPAdes	Pass	324	295	99.79	98.92	0	0	0	0	46	0	0	25	4	0	0	99.51	4719450	10338	12820	307	40
80X	Mut_21	SKESA	Pass	294	291	99.88	98.43	0	0	0	0	40	0	0	0	3	0	0	99.26	4707337	10299	24933	294	40
80X	Mut_21	SPAdes	Pass	314	295	99.81	98.94	0	0	0	0	46	0	0	14	5	0	0	99.51	4719505	10307	12765	301	40
100X	Mut_22	SKESA	Pass	298	296	99.89	98.46	0	0	0	0	40	0	0	2	0	0	0	99.26	4707382	10405	24888	296	40
100X	Mut_22	SPAdes	Pass	333	299	99.83	98.93	0	0	0	0	46	0	0	33	1	0	0	99.51	4719290	10436	12980	305	40
20X	Mut_22	SKESA	Pass	297	226	98.23	93.65	4	0	0	0	40	0	0	2	65	0	0	95.2	4515167	10311	217103	294	38
20X	Mut_22	SPAdes	Pass	328	303	99.8	98.9	0	0	0	0	46	0	0	22	3	0	0	99.5	4718958	10467	13312	307	40
40X	Mut_22	SKESA	Pass	298	292	99.85	97.89	0	0	0	0	40	0	0	2	4	0	0	98.8	4685886	10405	46384	296	40
40X	Mut_22	SPAdes	Pass	328	299	99.83	98.93	0	0	0	0	46	0	0	27	2	0	0	99.51	4719268	10436	13002	304	40
60X	Mut_22	SKESA	Pass	298	296	99.89	98.36	0	0	0	0	40	0	0	2	0	0	0	99.21	4704981	10405	27289	296	40
60X	Mut_22	SPAdes	Pass	333	303	99.83	98.93	0	0	0	0	46	0	0	29	1	0	0	99.51	4719280	10436	12990	313	40
80X	Mut_22	SKESA	Pass	298	296	99.9	98.43	0	0	0	0	40	0	0	2	0	0	0	99.24	4706592	10405	25678	296	40
80X	Mut_22	SPAdes	Pass	332	300	99.84	98.93	0	0	0	0	46	0	0	27	5	0	0	99.51	4719290	10436	12980	311	40
100X	Mut_23	SKESA	Pass	297	295	99.92	98.48	0	0	0	0	40	0	0	0	2	0	0	99.25	4707170	10411	25100	297	40
100X	Mut_23	SPAdes	Pass	322	298	99.82	98.94	0	0	0	0	44	0	0	19	5	0	0	99.51	4719430	10411	12840	308	40
20X	Mut_23	SKESA	Pass	290	220	98.28	93.68	7	0	0	0	39	0	0	0	63	0	0	95.18	4513803	9991	218467	283	38
20X	Mut_23	SPAdes	Pass	327	294	99.81	98.97	0	0	0	0	46	0	0	29	4	0	0	99.5	4718954	10441	13316	307	40
40X	Mut_23	SKESA	Pass	302	294	99.87	97.91	0	0	0	0	73	0	0	4	4	0	0	98.79	4685356	10442	46914	299	40
40X	Mut_23	SPAdes	Pass	319	296	99.84	98.93	0	0	0	0	46	0	0	17	6	0	0	99.51	4719343	10411	12927	306	40
60X	Mut_23	SKESA	Pass	297	295	99.9	98.38	0	0	0	0	40	0	0	0	2	0	0	99.19	4704484	10411	27786	297	40
60X	Mut_23	SPAdes	Pass	326	298	99.82	98.93	0	0	0	0	44	0	0	24	4	0	0	99.51	4719407	10411	12863	310	40
80X	Mut_23	SKESA	Pass	297	295	99.92	98.43	0	0	0	0	40	0	0	0	2	0	0	99.22	4705907	10411	26363	297	40
80X	Mut_23	SPAdes	Pass	332	301	99.84	98.93	0	0	0	0	46	0	0	25	6	0	0	99.51	4719341	10411	12929	314	40
100X	Mut_24	SKESA	Pass	299	298	99.9	98.48	0	0	0	0	40	0	0	0	1	0	0	99.26	4707659	10458	24611	299	40
100X	Mut_24	SPAdes	Pass	329	301	99.83	98.94	0	0	0	0	44	0	0	24	4	0	0	99.51	4719366	10490	12904	314	40
20X	Mut_24	SKESA	Pass	291	223	98.33	93.68	9	0	0	0	37	0	0	0	61	0	0	95.14	4511678	10106	220592	287	39
20X	Mut_24	SPAdes	Pass	329	301	99.83	98.93	0	0	0	0	44	0	0	25	3	0	0	99.51	4719384	10490	12886	308	40
40X	Mut_24	SKESA	Pass	301	289	99.86	97.9	0	0	0	0	73	0	0	5	7	0	0	98.79	4685171	10369	47099	297	40
40X	Mut_24	SPAdes	Pass	329	301	99.83	98.94	0	0	0	0	44	0	0	25	3	0	0	99.51	4719326	10490	12944	308	40
60X	Mut_24	SKESA	Pass	297	294	99.89	98.38	0	0	0	0	40	0	0	0	3	0	0	99.21	4705028	10396	27242	297	40
60X	Mut_24	SPAdes	Pass	329	302	99.84	98.94	0	0	0	0	44	0	0	24	3	0	0	99.51	4719366	10490	12904	314	40
80X	Mut_24	SKESA	Pass	298	295	99.9	98.44	0	0	0	0	40	0	0	0	3	0	0	99.24	4706743	10427	25527	298	40
80X	Mut_24	SPAdes	Pass	331	301	99.83	98.94	0	0	0	0	44	0	0	27	3	0	0	99.51	4719353	10490	12917	308	40
100X	Mut_25	SKESA	Pass	298	295	99.88	98.43	0	0	0	0	37	0	0	0	3	0	0	99.25	4707029	10344	25241	298	37
100X	Mut_25	SPAdes	Pass	334	301	99.83	98.93	0	0	0	0	43	0	0	28	5	0	0	99.51	4719431	10344	12839	315	37
20X	Mut_25	SKESA	Pass	288	225	98.09	93.46	3	0	0	0	35	0	0	0	60	0	0	95.12	4510879	9926	221391	286	34
20X	Mut_25	SPAdes	Pass	324	302	99.84	98.9	2	0	0	0	43	0	0	18	2	0	0	99.5	4718952	10355	13318	307	37
40X	Mut_25	SKESA	Pass	297	290	99.84	97.9	0	0	0	0	37	0	0	0	7	0	0	98.82	4686502	10313	45768	297	37
40X	Mut_25	SPAdes	Pass	330	303	99.84	98.93	0	0	0	0	43	0	0	24	3	0	0	99.51	4719336	10344	12934	308	37
60X	Mut_25	SKESA	Pass	298	295	99.87	98.34	0	0	0	0	37	0	0	0	3	0	0	99.19	4704415	10344	27855	298	37
60X	Mut_25	SPAdes	Pass	328	301	99.83	98.93	0	0	0	0	43	0	0	24	3	0	0	99.51	4719431	10344	12839	306	37
80X	Mut_25	SKESA	Pass	298	295	99.88	98.41	0	0	0	0	37	0	0	0	3	0	0	99.24	4706474	10344	25796	298	37
80X	Mut_25	SPAdes	Pass	334	301	99.83	98.93	0	0	0	0	43	0	0	28	5	0	0	99.51	4719431	10344	12839	315	37
100X	Mut_26	SKESA	Pass	297	294	99.89	98.46	0	0	0	0	40	0	0	0	3	0	0	99.26	4707530	10343	24740	296	40
100X	Mut_26	SPAdes	Pass	321	300	99.82	98.94	1	0	0	0	46	0	0	13	7	0	0	99.51	4719433	10416	12837	308	40
20X	Mut_26	SKESA	Pass	288	227	98.28	93.72	10	0	0	0	36	0	0	0	53	0	0	95.22	4515524	9946	216746	283	38
20X	Mut_26	SPAdes	Pass	344	300	99.8	98.91	1	0	0	0	46	0	0	35	8	0	0	99.5	4718900	10425	13370	316	40
40X	Mut_26	SKESA	Pass	294	283	99.87	97.92	1	0	0	0	39	0	0	0	10	0	0	98.81	4685924	10221	46346	293	39
40X	Mut_26	SPAdes	Pass	334	300	99.83	98.93	1	0	0	0	46	0	0	26	7	0	0	99.51	4719397	10447	12873	314	40
60X	Mut_26	SKESA	Pass	297	294	99.89	98.37	0	0	0	0	40	0	0	0	3	0	0	99.2	4704732	10343	27538	296	40
60X	Mut_26	SPAdes	Pass	318	300	99.8	98.92	1	0	0	0	46	0	0	13	4	0	0	99.51	4719433	10416	12837	305	40
80X	Mut_26	SKESA	Pass	297	294	99.9	98.44	0	0	0	0	40	0	0	0	3	0	0	99.25	4706809	10343	25461	296	40
80X	Mut_26	SPAdes	Pass	326	301	99.82	98.94	1	0	0	0	46	0	0	17	7	0	0	99.51	4719433	10416	12837	313	40
100X	Mut_27	SKESA	Pass	295	289	99.9	98.48	0	0	0	0	40	0	0	2	4	0	0	99.27	4707843	10307	24427	293	40
100X	Mut_27	SPAdes	Pass	324	295	99.83	98.93	0	0	0	0	46	0	0	21	8	0	0	99.51	4719396	10338	12874	305	40
20X	Mut_27	SKESA	Pass	291	228	98.31	93.72	7	0	0	0	40	0	0	2	54	0	0	95.2	4514473	10046	217797	284	39
20X	Mut_27	SPAdes	Pass	331	295	99.87	98.93	0	0	0	0	49	0	0	27	9	0	0	99.5	4718778	10344	13492	304	40
40X	Mut_27	SKESA	Pass	294	283	99.87	97.91	0	0	0	0	40	0	0	2	9	0	0	98.8	4685654	10276	46616	292	40
40X	Mut_27	SPAdes	Pass	319	294	99.84	98.94	0	0	0	0	46	0	0	19	6	0	0	99.51	4719385	10307	12885	300	40
60X	Mut_27	SKESA	Pass	295	288	99.9	98.38	0	0	0	0	40	0	0	2	5	0	0	99.2	4704504	10307	27766	293	40
60X	Mut_27	SPAdes	Pass	323	296	99.84	98.93	0	0	0	0	46	0	0	21	6	0	0	99.51	4719396	10338	12874	302	40
80X	Mut_27	SKESA	Pass	295	288	99.9	98.44	0	0	0	0	40	0	0	2	5	0	0	99.24	4706731	10307	25539	293	40
80X	Mut_27	SPAdes	Pass	321	295	99.83	98.93	0	0	0	0	46	0	0	21	5	0	0	99.51	4719396	10338	12874	302	40
100X	Mut_28	SKESA	Pass	296	293	99.87	98.46	0	0	0	0	38	0	0	0	3	0	0	99.27	4708106	10293	24164	296	38
100X	Mut_28	SPAdes	Pass	326	294	99.83	98.93	1	0	0	0	45	0	0	30	2	0	0	99.51	4719521	10395	12749	304	40
20X	Mut_28	SKESA	Pass	289	192	98.27	93.63	10	0	0	0	37	0	0	0	87	0	0	95.13	4511067	9969	221203	285	37
20X	Mut_28	SPAdes	Pass	332	295	99.82	98.92	1	0	0	0	45	0	0	34	3	0	0	99.5	4719148	10400	13122	307	40
40X	Mut_28	SKESA	Pass	298	288	99.88	97.92	0	0	0	0	71	0	0	4	6	0	0	98.8	4685432	10231	46838	295	38
40X	Mut_28	SPAdes	Pass	321	295	99.83	98.93	1	0	0	0	45	0	0	21	5	0	0	99.51	4719484	10395	12786	304	40
60X	Mut_28	SKESA	Pass	296	293	99.88	98.37	0	0	0	0	38	0	0	0	3	0	0	99.21	4704863	10293	27407	296	38
60X	Mut_28	SPAdes	Pass	328	294	99.83	98.93	1	0	0	0	44	0	0	32	2	0	0	99.51	4719538	10365	12732	306	39
80X	Mut_28	SKESA	Pass	296	293	99.88	98.42	0	0	0	0	38	0	0	0	3	0	0	99.24	4706671	10293	25599	296	38
80X	Mut_28	SPAdes	Pass	327	294	99.81	98.92	1	0	0	0	44	0	0	30	3	0	0	99.51	4719521	10365	12749	305	39
100X	Mut_29	SKESA	Pass	299	294	99.89	98.46	0	0	0	0	40	0	0	0	5	0	0	99.26	4707637	10458	24633	299	40
100X	Mut_29	SPAdes	Pass	324	302	99.83	98.93	1	0	0	0	46	0	0	19	2	0	0	99.51	4719301	10490	12969	307	40
20X	Mut_29	SKESA	Pass	293	230	98.27	93.66	7	0	0	0	39	0	0	0	57	0	0	95.15	4512660	10161	219610	289	39
20X	Mut_29	SPAdes	Pass	338	308	99.85	98.93	0	0	0	0	46	0	0	25	5	0	0	99.49	4718751	10589	13519	320	40
40X	Mut_29	SKESA	Pass	299	285	99.88	97.94	0	0	0	0	40	0	0	0	14	0	0	98.82	4686743	10459	45527	299	40
40X	Mut_29	SPAdes	Pass	333	305	99.82	98.93	0	0	0	0	46	0	0	24	4	0	0	99.51	4719344	10490	12926	315	40
60X	Mut_29	SKESA	Pass	299	294	99.88	98.37	0	0	0	0	40	0	0	0	5	0	0	99.2	4704797	10458	27473	299	40
60X	Mut_29	SPAdes	Pass	335	303	99.83	98.93	0	0	0	0	46	0	0	26	6	0	0	99.51	4719301	10490	12969	313	40
80X	Mut_29	SKESA	Pass	299	294	99.89	98.42	0	0	0	0	40	0	0	0	5	0	0	99.24	4706598	10458	25672	299	40
80X	Mut_29	SPAdes	Pass	325	302	99.83	98.93	1	0	0	0	46	0	0	19	3	0	0	99.51	4719299	10490	12971	308	40
100X	Mut_3	SKESA	Pass	293	291	99.89	98.45	0	0	0	0	37	0	0	0	2	0	0	99.26	4707490	10153	24780	290	37
100X	Mut_3	SPAdes	Pass	331	293	99.85	98.93	1	0	0	0	43	0	0	32	5	0	0	99.51	4719266	10266	13004	309	37
20X	Mut_3	SKESA	Pass	293	227	98.15	93.53	6	0	0	0	34	0	0	0	62	0	0	95.15	4512466	10042	219804	287	34
20X	Mut_3	SPAdes	Pass	342	296	99.83	98.92	1	0	0	0	41	0	0	42	3	0	0	99.51	4719262	10254	13008	309	37
40X	Mut_3	SKESA	Pass	291	281	99.87	97.89	0	0	0	0	37	0	0	0	10	0	0	98.79	4684843	10073	47427	287	37
40X	Mut_3	SPAdes	Pass	318	294	99.85	98.93	1	0	0	0	43	0	0	20	3	0	0	99.51	4719468	10235	12802	301	37
60X	Mut_3	SKESA	Pass	292	290	99.87	98.35	0	0	0	0	37	0	0	0	2	0	0	99.22	4705173	10122	27097	289	37
60X	Mut_3	SPAdes	Pass	328	298	99.85	98.93	1	0	0	0	43	0	0	23	6	0	0	99.51	4719448	10266	12822	307	37
80X	Mut_3	SKESA	Pass	293	291	99.9	98.44	0	0	0	0	37	0	0	0	2	0	0	99.25	4706928	10153	25342	290	37
80X	Mut_3	SPAdes	Pass	336	293	99.85	98.93	1	0	0	0	43	0	0	37	5	0	0	99.51	4719435	10266	12835	313	37
100X	Mut_30	SKESA	Pass	295	292	99.89	98.47	0	0	0	0	40	0	0	0	3	0	0	99.27	4707807	10335	24463	295	40
100X	Mut_30	SPAdes	Pass	330	296	99.83	98.93	0	0	0	0	46	0	0	30	4	0	0	99.51	4719482	10335	12788	307	40
20X	Mut_30	SKESA	Pass	285	215	98.25	93.58	7	0	0	0	40	0	0	0	63	0	0	95.09	4509333	9969	222937	283	40
20X	Mut_30	SPAdes	Pass	330	298	99.84	98.94	0	0	0	0	46	0	0	28	4	0	0	99.51	4719164	10335	13106	310	40
40X	Mut_30	SKESA	Pass	293	285	99.83	97.88	1	0	0	0	40	0	0	0	7	0	0	98.8	4685849	10256	46421	293	40
40X	Mut_30	SPAdes	Pass	328	296	99.81	98.93	0	0	0	0	44	0	0	25	7	0	0	99.51	4719545	10335	12725	309	40
60X	Mut_30	SKESA	Pass	295	292	99.87	98.35	0	0	0	0	40	0	0	0	3	0	0	99.2	4704670	10335	27600	295	40
60X	Mut_30	SPAdes	Pass	316	296	99.82	98.93	0	0	0	0	44	0	0	16	4	0	0	99.51	4719569	10335	12701	304	40
80X	Mut_30	SKESA	Pass	295	292	99.88	98.41	0	0	0	0	40	0	0	0	3	0	0	99.24	4706470	10335	25800	295	40
80X	Mut_30	SPAdes	Pass	323	296	99.83	98.93	0	0	0	0	46	0	0	23	4	0	0	99.51	4719452	10365	12818	308	40
100X	Mut_31	SKESA	Pass	298	292	99.9	98.47	0	0	0	0	40	0	0	4	2	0	0	99.26	4707646	10430	24624	298	40
100X	Mut_31	SPAdes	Pass	328	298	99.83	98.93	0	0	0	0	46	0	0	26	4	0	0	99.51	4719306	10430	12964	310	40
20X	Mut_31	SKESA	Pass	295	213	98.08	93.49	5	1	0	0	40	0	0	0	76	0	0	95.17	4513282	10201	218988	289	40
20X	Mut_31	SPAdes	Pass	347	301	99.85	98.92	3	0	0	0	47	0	0	36	7	0	0	99.49	4718601	10511	13669	318	41
40X	Mut_31	SKESA	Pass	302	280	99.87	97.92	1	0	0	0	73	0	0	9	12	0	0	98.8	4685803	10427	46467	299	40
40X	Mut_31	SPAdes	Pass	330	295	99.83	98.93	0	0	0	0	47	0	0	31	4	0	0	99.5	4719198	10437	13072	310	41
60X	Mut_31	SKESA	Pass	298	292	99.9	98.38	0	0	0	0	40	0	0	4	2	0	0	99.2	4704974	10430	27296	298	40
60X	Mut_31	SPAdes	Pass	330	297	99.84	98.93	0	0	0	0	46	0	0	28	5	0	0	99.51	4719272	10461	12998	312	40
80X	Mut_31	SKESA	Pass	298	292	99.91	98.45	0	0	0	0	40	0	0	4	2	0	0	99.24	4706852	10430	25418	298	40
80X	Mut_31	SPAdes	Pass	330	296	99.83	98.93	0	0	0	0	46	0	0	30	4	0	0	99.51	4719299	10437	12971	311	40
100X	Mut_32	SKESA	Pass	294	293	99.9	98.48	0	0	0	0	39	0	0	0	1	0	0	99.27	4707992	10281	24278	294	39
100X	Mut_32	SPAdes	Pass	329	298	99.84	98.93	0	0	0	0	46	0	0	27	4	0	0	99.51	4719400	10435	12870	311	40
20X	Mut_32	SKESA	Pass	293	231	98.22	93.57	6	0	0	0	36	0	0	0	57	0	0	95.14	4511857	10070	220413	288	37
20X	Mut_32	SPAdes	Pass	336	303	99.83	98.93	0	0	0	0	46	0	0	26	7	0	0	99.5	4719056	10468	13214	316	40
40X	Mut_32	SKESA	Pass	293	285	99.87	97.9	0	0	0	0	39	0	0	0	8	0	0	98.79	4684945	10250	47325	293	39
40X	Mut_32	SPAdes	Pass	333	298	99.81	98.92	0	0	0	0	46	0	0	30	5	0	0	99.51	4719367	10435	12903	307	40
60X	Mut_32	SKESA	Pass	294	292	99.89	98.38	0	0	0	0	39	0	0	0	2	0	0	99.22	4705333	10281	26937	294	39
60X	Mut_32	SPAdes	Pass	327	298	99.84	98.93	0	0	0	0	46	0	0	24	5	0	0	99.51	4719380	10435	12890	308	40
80X	Mut_32	SKESA	Pass	294	292	99.91	98.45	0	0	0	0	39	0	0	0	2	0	0	99.26	4707417	10281	24853	294	39
80X	Mut_32	SPAdes	Pass	326	298	99.84	98.93	0	0	0	0	46	0	0	20	8	0	0	99.51	4719367	10435	12903	311	40
100X	Mut_33	SKESA	Pass	296	295	99.91	98.47	0	0	0	0	39	0	0	0	1	0	0	99.25	4707132	10327	25138	296	39
100X	Mut_33	SPAdes	Pass	315	299	99.83	98.93	0	0	0	0	45	0	0	13	3	0	0	99.51	4719406	10358	12864	302	39
20X	Mut_33	SKESA	Pass	292	226	98.33	93.72	4	0	0	0	37	0	0	0	63	0	0	95.19	4514156	10065	218114	289	36
20X	Mut_33	SPAdes	Pass	338	301	99.82	98.91	0	0	0	0	43	0	0	33	4	0	0	99.5	4718769	10408	13501	315	39
40X	Mut_33	SKESA	Pass	294	285	99.89	97.94	0	0	0	0	38	0	0	0	9	0	0	98.81	4686036	10209	46234	293	38
40X	Mut_33	SPAdes	Pass	329	301	99.84	98.94	0	0	0	0	45	0	0	22	6	0	0	99.51	4719317	10389	12953	311	39
60X	Mut_33	SKESA	Pass	296	295	99.88	98.35	0	0	0	0	39	0	0	0	1	0	0	99.2	4704581	10327	27689	296	39
60X	Mut_33	SPAdes	Pass	331	299	99.83	98.93	0	0	0	0	45	0	0	28	4	0	0	99.51	4719403	10358	12867	312	39
80X	Mut_33	SKESA	Pass	296	295	99.89	98.42	0	0	0	0	39	0	0	0	1	0	0	99.23	4706074	10327	26196	296	39
80X	Mut_33	SPAdes	Pass	318	300	99.84	98.93	0	0	0	0	45	0	0	16	2	0	0	99.51	4719406	10358	12864	305	39
100X	Mut_34	SKESA	Pass	294	291	99.9	98.46	0	0	0	0	40	0	0	0	3	0	0	99.26	4707300	10314	24970	294	40
100X	Mut_34	SPAdes	Pass	331	298	99.86	98.94	1	0	0	0	46	0	0	28	4	0	0	99.51	4719436	10376	12834	312	40
20X	Mut_34	SKESA	Pass	289	231	98.34	93.74	10	0	0	0	37	0	0	0	50	0	0	95.19	4514302	10054	217968	287	37
20X	Mut_34	SPAdes	Pass	334	301	99.86	98.94	1	0	0	0	46	0	0	28	4	0	0	99.5	4719091	10401	13179	310	40
40X	Mut_34	SKESA	Pass	299	289	99.87	97.91	0	0	0	0	73	0	0	4	6	0	0	98.8	4685499	10345	46771	296	40
40X	Mut_34	SPAdes	Pass	327	298	99.86	98.94	1	0	0	0	46	0	0	24	4	0	0	99.51	4719466	10345	12804	305	40
60X	Mut_34	SKESA	Pass	294	291	99.89	98.37	0	0	0	0	40	0	0	0	3	0	0	99.2	4704521	10314	27749	294	40
60X	Mut_34	SPAdes	Pass	328	298	99.87	98.96	1	0	0	0	46	0	0	26	3	0	0	99.51	4719441	10376	12829	307	40
80X	Mut_34	SKESA	Pass	294	292	99.9	98.43	0	0	0	0	40	0	0	0	2	0	0	99.24	4706446	10314	25824	294	40
80X	Mut_34	SPAdes	Pass	322	298	99.86	98.94	1	0	0	0	46	0	0	19	4	0	0	99.51	4719427	10376	12843	305	40
100X	Mut_35	SKESA	Pass	300	294	99.89	98.47	1	0	0	0	39	0	0	0	5	0	0	99.27	4708052	10483	24218	300	39
100X	Mut_35	SPAdes	Pass	321	299	99.83	98.93	0	0	0	0	46	0	0	17	5	0	0	99.5	4719236	10490	13034	307	40
20X	Mut_35	SKESA	Pass	294	219	98.29	93.69	10	0	0	0	37	0	0	0	66	0	0	95.17	4513651	10213	218619	292	38
20X	Mut_35	SPAdes	Pass	338	302	99.83	98.93	0	0	0	0	46	0	0	32	4	0	0	99.5	4718874	10551	13396	317	40
40X	Mut_35	SKESA	Pass	301	291	99.87	97.97	0	0	0	0	72	0	0	4	6	0	0	98.86	4688553	10387	43717	298	39
40X	Mut_35	SPAdes	Pass	327	303	99.83	98.93	0	0	0	0	46	0	0	20	4	0	0	99.5	4719176	10533	13094	310	40
60X	Mut_35	SKESA	Pass	299	294	99.89	98.38	0	0	0	0	39	0	0	0	5	0	0	99.21	4705018	10452	27252	299	39
60X	Mut_35	SPAdes	Pass	332	298	99.83	98.93	0	0	0	0	46	0	0	30	4	0	0	99.5	4719229	10480	13041	310	40
80X	Mut_35	SKESA	Pass	299	294	99.9	98.44	0	0	0	0	39	0	0	0	5	0	0	99.24	4706490	10452	25780	299	39
80X	Mut_35	SPAdes	Pass	321	303	99.83	98.93	0	0	0	0	46	0	0	13	5	0	0	99.5	4719236	10490	13034	307	40
100X	Mut_36	SKESA	Pass	297	295	99.89	98.45	0	0	0	0	38	0	0	0	2	0	0	99.26	4707474	10333	24796	297	38
100X	Mut_36	SPAdes	Pass	328	302	99.84	98.93	0	0	0	0	44	0	0	22	4	0	0	99.51	4719464	10333	12806	310	38
20X	Mut_36	SKESA	Pass	291	216	98.21	93.61	4	0	0	0	34	0	0	0	72	0	0	95.17	4513100	10009	219170	289	35
20X	Mut_36	SPAdes	Pass	334	301	99.8	98.92	0	0	0	0	44	0	0	26	7	0	0	99.5	4719094	10343	13176	310	38
40X	Mut_36	SKESA	Pass	296	288	99.87	97.91	0	0	0	0	36	0	0	0	8	0	0	98.81	4685906	10243	46364	296	36
40X	Mut_36	SPAdes	Pass	329	301	99.81	98.94	0	0	0	0	44	0	0	25	3	0	0	99.51	4719494	10333	12776	311	38
60X	Mut_36	SKESA	Pass	296	295	99.88	98.37	0	0	0	0	38	0	0	0	1	0	0	99.21	4704977	10302	27293	296	38
60X	Mut_36	SPAdes	Pass	332	301	99.84	98.94	0	0	0	0	44	0	0	27	4	0	0	99.51	4719453	10333	12817	314	38
80X	Mut_36	SKESA	Pass	297	295	99.89	98.45	0	0	0	0	38	0	0	0	2	0	0	99.25	4706978	10333	25292	297	38
80X	Mut_36	SPAdes	Pass	340	300	99.84	98.93	0	0	0	0	44	0	0	35	5	0	0	99.51	4719271	10333	12999	312	38
100X	Mut_37	SKESA	Pass	296	294	99.9	98.47	0	0	0	0	39	0	0	0	2	0	0	99.26	4707710	10338	24560	296	39
100X	Mut_37	SPAdes	Pass	318	294	99.84	98.94	0	0	0	0	46	0	0	17	7	0	0	99.51	4719390	10369	12880	305	40
20X	Mut_37	SKESA	Pass	293	231	98.28	93.64	5	0	0	0	37	0	0	0	57	0	0	95.12	4511165	10141	221105	291	37
20X	Mut_37	SPAdes	Pass	325	298	99.81	98.93	0	0	0	0	46	0	0	21	6	0	0	99.5	4719247	10460	13023	311	40
40X	Mut_37	SKESA	Pass	299	289	99.84	97.89	0	0	0	0	72	0	0	4	6	0	0	98.8	4685726	10307	46544	296	39
40X	Mut_37	SPAdes	Pass	322	296	99.82	98.94	0	0	0	0	46	0	0	20	6	0	0	99.51	4719474	10431	12796	309	40
60X	Mut_37	SKESA	Pass	295	293	99.88	98.37	0	0	0	0	39	0	0	0	2	0	0	99.21	4704885	10307	27385	295	39
60X	Mut_37	SPAdes	Pass	328	294	99.84	98.94	0	0	0	0	46	0	0	28	6	0	0	99.51	4719390	10369	12880	310	40
80X	Mut_37	SKESA	Pass	295	294	99.9	98.44	0	0	0	0	39	0	0	0	1	0	0	99.24	4706557	10307	25713	295	39
80X	Mut_37	SPAdes	Pass	318	294	99.84	98.94	0	0	0	0	46	0	0	17	7	0	0	99.51	4719390	10369	12880	305	40
100X	Mut_38	SKESA	Pass	296	295	99.92	98.49	0	0	0	0	40	0	0	0	1	0	0	99.26	4707588	10362	24682	296	40
100X	Mut_38	SPAdes	Pass	318	299	99.83	98.94	0	0	0	0	46	0	0	17	2	0	0	99.51	4719384	10393	12886	305	40
20X	Mut_38	SKESA	Pass	292	219	98.37	93.84	7	0	0	0	37	0	0	0	66	0	0	95.28	4518301	10020	213969	287	36
20X	Mut_38	SPAdes	Pass	329	299	99.83	98.92	0	0	0	0	46	0	0	27	3	0	0	99.5	4719010	10362	13260	306	40
40X	Mut_38	SKESA	Pass	300	285	99.78	97.82	0	38	0	0	39	0	0	0	10	0	0	98.8	4685618	10333	46652	297	39
40X	Mut_38	SPAdes	Pass	328	299	99.81	98.94	0	0	0	0	46	0	0	26	3	0	0	99.51	4719442	10393	12828	307	40
60X	Mut_38	SKESA	Pass	297	294	99.89	98.38	0	0	0	0	40	0	0	0	3	0	0	99.21	4705198	10362	27072	297	40
60X	Mut_38	SPAdes	Pass	324	299	99.84	98.93	0	0	0	0	46	0	0	21	4	0	0	99.51	4719380	10393	12890	305	40
80X	Mut_38	SKESA	Pass	296	295	99.91	98.43	0	0	0	0	40	0	0	0	1	0	0	99.23	4706279	10362	25991	296	40
80X	Mut_38	SPAdes	Pass	329	299	99.83	98.94	0	0	0	0	46	0	0	28	2	0	0	99.51	4719383	10393	12887	307	40
100X	Mut_39	SKESA	Pass	294	290	99.9	98.46	0	0	0	0	39	0	0	0	4	0	0	99.25	4707184	10251	25086	292	39
100X	Mut_39	SPAdes	Pass	319	298	99.83	98.93	0	0	0	0	46	0	0	16	5	0	0	99.51	4719238	10312	13032	303	40
20X	Mut_39	SKESA	Pass	289	207	98.15	93.56	7	0	0	0	37	0	0	0	75	0	0	95.2	4514521	9982	217749	285	37
20X	Mut_39	SPAdes	Pass	328	298	99.8	98.91	1	0	0	0	46	0	0	25	4	0	0	99.5	4719137	10374	13133	307	40
40X	Mut_39	SKESA	Pass	298	280	99.88	97.94	1	0	0	0	70	0	0	4	14	0	0	98.82	4686707	10204	45563	292	38
40X	Mut_39	SPAdes	Pass	327	296	99.84	98.93	0	0	0	0	46	0	0	27	4	0	0	99.51	4719340	10312	12930	302	40
60X	Mut_39	SKESA	Pass	294	289	99.89	98.37	0	0	0	0	38	0	0	0	5	0	0	99.2	4704573	10222	27697	292	38
60X	Mut_39	SPAdes	Pass	319	298	99.83	98.94	0	0	0	0	46	0	0	17	4	0	0	99.51	4719487	10312	12783	304	40
80X	Mut_39	SKESA	Pass	294	290	99.9	98.43	0	0	0	0	39	0	0	0	4	0	0	99.24	4706502	10251	25768	292	39
80X	Mut_39	SPAdes	Pass	322	298	99.83	98.93	0	0	0	0	46	0	0	17	7	0	0	99.51	4719309	10343	12961	306	40
100X	Mut_4	SKESA	Pass	297	295	99.89	98.46	0	0	0	0	38	0	0	0	2	0	0	99.25	4707244	10334	25026	297	38
100X	Mut_4	SPAdes	Pass	329	300	99.83	98.93	0	0	0	0	44	0	0	25	4	0	0	99.51	4719324	10395	12946	310	38
20X	Mut_4	SKESA	Pass	290	213	98.16	93.58	8	0	0	0	35	0	0	0	71	0	0	95.2	4514427	9977	217843	287	35
20X	Mut_4	SPAdes	Pass	329	297	99.83	98.91	0	0	0	0	44	0	0	30	2	0	0	99.5	4719158	10395	13112	303	38
40X	Mut_4	SKESA	Pass	302	291	99.86	97.9	0	0	0	0	71	0	0	4	7	0	0	98.8	4685622	10365	46648	299	38
40X	Mut_4	SPAdes	Pass	333	300	99.8	98.93	0	0	0	0	44	0	0	29	4	0	0	99.51	4719384	10395	12886	311	38
60X	Mut_4	SKESA	Pass	297	294	99.88	98.36	0	0	0	0	38	0	0	0	3	0	0	99.2	4704514	10334	27756	297	38
60X	Mut_4	SPAdes	Pass	329	302	99.83	98.93	0	0	0	0	44	0	0	25	2	0	0	99.51	4719346	10395	12924	307	38
80X	Mut_4	SKESA	Pass	297	295	99.89	98.42	0	0	0	0	38	0	0	0	2	0	0	99.23	4706271	10334	25999	297	38
80X	Mut_4	SPAdes	Pass	324	301	99.83	98.93	0	0	0	0	44	0	0	20	3	0	0	99.51	4719324	10395	12946	307	38
100X	Mut_40	SKESA	Pass	296	294	99.91	98.47	0	0	0	0	38	0	0	0	2	0	0	99.26	4707462	10310	24808	296	38
100X	Mut_40	SPAdes	Pass	320	299	99.86	98.93	0	0	0	0	44	0	0	17	4	0	0	99.51	4719215	10400	13055	307	38
20X	Mut_40	SKESA	Pass	291	217	98.37	93.78	6	0	0	0	35	0	0	0	69	0	0	95.2	4514466	9999	217804	287	36
20X	Mut_40	SPAdes	Pass	343	303	99.88	98.92	1	0	0	0	44	0	0	35	4	0	0	99.5	4718865	10435	13405	314	38
40X	Mut_40	SKESA	Pass	295	288	99.87	97.96	1	0	0	0	38	0	0	0	6	0	0	98.86	4688462	10242	43808	294	38
40X	Mut_40	SPAdes	Pass	320	299	99.86	98.93	0	0	0	0	44	0	0	16	5	0	0	99.5	4719142	10400	13128	307	38
60X	Mut_40	SKESA	Pass	296	292	99.89	98.37	0	0	0	0	38	0	0	0	4	0	0	99.2	4704719	10283	27551	295	38
60X	Mut_40	SPAdes	Pass	336	298	99.86	98.93	0	0	0	0	44	0	0	33	5	0	0	99.5	4719062	10400	13208	310	38
80X	Mut_40	SKESA	Pass	296	294	99.91	98.43	0	0	0	0	38	0	0	0	2	0	0	99.24	4706543	10310	25727	296	38
80X	Mut_40	SPAdes	Pass	321	299	99.86	98.93	0	0	0	0	44	0	0	17	5	0	0	99.51	4719215	10400	13055	308	38
100X	Mut_41	SKESA	Pass	294	292	99.9	98.46	0	0	0	0	39	0	0	0	2	0	0	99.25	4707049	10303	25221	294	39
100X	Mut_41	SPAdes	Pass	319	298	99.83	98.93	0	0	0	0	45	0	0	16	5	0	0	99.51	4719432	10365	12838	306	39
20X	Mut_41	SKESA	Pass	288	214	98.28	93.61	6	0	0	0	39	0	0	0	68	0	0	95.09	4509583	9955	222687	283	39
20X	Mut_41	SPAdes	Pass	326	301	99.83	98.94	0	0	0	0	45	0	0	22	3	0	0	99.5	4719059	10413	13211	311	39
40X	Mut_41	SKESA	Pass	293	285	99.86	97.9	0	0	0	0	39	0	0	0	8	0	0	98.8	4685475	10241	46795	293	39
40X	Mut_41	SPAdes	Pass	330	299	99.84	98.93	0	0	0	0	45	0	0	28	3	0	0	99.51	4719423	10365	12847	308	39
60X	Mut_41	SKESA	Pass	294	291	99.9	98.38	0	0	0	0	39	0	0	0	3	0	0	99.2	4704817	10288	27453	293	39
60X	Mut_41	SPAdes	Pass	314	299	99.84	98.93	0	0	0	0	45	0	0	11	4	0	0	99.51	4719330	10365	12940	303	39
80X	Mut_41	SKESA	Pass	294	292	99.91	98.44	0	0	0	0	39	0	0	0	2	0	0	99.24	4706317	10303	25953	294	39
80X	Mut_41	SPAdes	Pass	322	298	99.84	98.93	0	0	0	0	45	0	0	22	2	0	0	99.51	4719330	10365	12940	306	39
100X	Mut_42	SKESA	Pass	294	292	99.9	98.46	0	0	0	0	40	0	0	0	2	0	0	99.26	4707251	10313	25019	294	40
100X	Mut_42	SPAdes	Pass	328	296	99.86	98.93	0	0	0	0	46	0	0	28	4	0	0	99.51	4719333	10344	12937	306	40
20X	Mut_42	SKESA	Pass	285	218	98.27	93.73	5	0	0	0	38	0	0	0	63	0	0	95.26	4517603	9956	214667	283	39
20X	Mut_42	SPAdes	Pass	336	299	99.81	98.93	0	0	0	0	46	0	0	29	8	0	0	99.51	4719345	10443	12925	313	40
40X	Mut_42	SKESA	Pass	291	287	99.85	97.91	1	0	0	0	39	0	0	0	4	0	0	98.81	4686261	10220	46009	291	40
40X	Mut_42	SPAdes	Pass	322	293	99.86	98.93	0	0	0	0	46	0	0	24	5	0	0	99.51	4719304	10370	12966	305	40
60X	Mut_42	SKESA	Pass	294	292	99.9	98.39	0	0	0	0	40	0	0	0	2	0	0	99.21	4704991	10313	27279	294	40
60X	Mut_42	SPAdes	Pass	323	296	99.86	98.93	0	0	0	0	46	0	0	23	4	0	0	99.51	4719333	10344	12937	306	40
80X	Mut_42	SKESA	Pass	294	292	99.92	98.45	0	0	0	0	40	0	0	0	2	0	0	99.24	4706757	10313	25513	294	40
80X	Mut_42	SPAdes	Pass	329	296	99.86	98.93	0	0	0	0	46	0	0	28	5	0	0	99.51	4719312	10361	12958	306	40
100X	Mut_43	SKESA	Pass	295	293	99.92	98.49	0	0	0	0	39	0	0	0	2	0	0	99.26	4707501	10307	24769	295	39
100X	Mut_43	SPAdes	Pass	318	298	99.83	98.93	3	0	0	0	45	0	0	13	4	0	0	99.51	4719371	10338	12899	304	39
20X	Mut_43	SKESA	Pass	288	220	98.16	93.54	6	0	0	0	38	0	0	0	63	0	0	95.16	4512452	9890	219818	282	38
20X	Mut_43	SPAdes	Pass	340	301	99.84	98.94	0	0	0	0	45	0	0	28	11	0	0	99.5	4718938	10395	13332	311	39
40X	Mut_43	SKESA	Pass	298	291	99.86	97.89	0	0	0	0	72	0	0	4	3	0	0	98.79	4685279	10276	46991	295	39
40X	Mut_43	SPAdes	Pass	325	297	99.84	98.93	0	0	0	0	45	0	0	24	4	0	0	99.51	4719393	10307	12877	301	39
60X	Mut_43	SKESA	Pass	295	293	99.91	98.38	0	0	0	0	39	0	0	0	2	0	0	99.19	4704269	10307	28001	295	39
60X	Mut_43	SPAdes	Pass	319	298	99.84	98.93	0	0	0	0	45	0	0	19	2	0	0	99.51	4719402	10338	12868	304	39
80X	Mut_43	SKESA	Pass	295	293	99.91	98.44	0	0	0	0	39	0	0	0	2	0	0	99.24	4706499	10307	25771	295	39
80X	Mut_43	SPAdes	Pass	317	298	99.83	98.93	3	0	0	0	45	0	0	13	3	0	0	99.51	4719371	10338	12899	303	39
100X	Mut_44	SKESA	Pass	295	292	99.9	98.48	0	0	0	0	40	0	0	0	3	0	0	99.27	4707841	10323	24429	295	40
100X	Mut_44	SPAdes	Pass	333	298	99.83	98.93	0	0	0	0	46	0	0	31	4	0	0	99.51	4719289	10354	12981	306	40
20X	Mut_44	SKESA	Pass	292	230	98.32	93.73	4	0	0	0	38	0	0	0	58	0	0	95.21	4515193	10077	217077	288	37
20X	Mut_44	SPAdes	Pass	337	301	99.84	98.92	0	0	0	0	46	0	0	29	7	0	0	99.5	4719126	10417	13144	312	40
40X	Mut_44	SKESA	Pass	297	289	99.84	97.86	0	0	0	0	72	0	0	4	4	0	0	98.77	4684168	10231	48102	294	39
40X	Mut_44	SPAdes	Pass	321	298	99.84	98.93	0	0	0	0	46	0	0	18	5	0	0	99.51	4719405	10354	12865	306	40
60X	Mut_44	SKESA	Pass	294	291	99.89	98.37	0	0	0	0	40	0	0	0	3	0	0	99.21	4704912	10292	27358	294	40
60X	Mut_44	SPAdes	Pass	332	296	99.84	98.93	0	0	0	0	46	0	0	30	6	0	0	99.51	4719436	10354	12834	313	40
80X	Mut_44	SKESA	Pass	294	292	99.9	98.43	0	0	0	0	40	0	0	0	2	0	0	99.25	4706980	10292	25290	294	40
80X	Mut_44	SPAdes	Pass	330	298	99.84	98.93	0	0	0	0	46	0	0	30	2	0	0	99.51	4719436	10354	12834	310	40
100X	Mut_45	SKESA	Pass	293	292	99.88	98.44	0	0	0	0	40	0	0	0	1	0	0	99.25	4707166	10276	25104	293	40
100X	Mut_45	SPAdes	Pass	331	299	99.84	98.93	0	0	0	0	46	0	0	28	4	0	0	99.51	4719384	10338	12886	309	40
20X	Mut_45	SKESA	Pass	289	228	98.3	93.71	2	0	0	0	38	0	0	0	59	0	0	95.2	4514718	10067	217552	287	38
20X	Mut_45	SPAdes	Pass	320	300	99.82	98.91	0	0	0	0	46	0	0	13	7	0	0	99.5	4719123	10338	13147	305	40
40X	Mut_45	SKESA	Pass	292	288	99.84	97.88	0	0	0	0	40	0	0	0	4	0	0	98.79	4685080	10245	47190	292	40
40X	Mut_45	SPAdes	Pass	322	296	99.81	98.91	0	0	0	0	46	0	0	24	2	0	0	99.51	4719396	10307	12874	307	40
60X	Mut_45	SKESA	Pass	293	292	99.89	98.37	0	0	0	0	40	0	0	0	1	0	0	99.21	4704995	10276	27275	293	40
60X	Mut_45	SPAdes	Pass	324	298	99.83	98.96	0	0	0	0	46	0	0	24	2	0	0	99.51	4719384	10338	12886	306	40
80X	Mut_45	SKESA	Pass	293	292	99.87	98.4	0	0	0	0	40	0	0	0	1	0	0	99.24	4706472	10276	25798	293	40
80X	Mut_45	SPAdes	Pass	324	298	99.83	98.93	0	0	0	0	46	0	0	24	2	0	0	99.51	4719384	10338	12886	306	40
100X	Mut_46	SKESA	Pass	294	291	99.89	98.45	0	0	0	0	37	0	0	0	3	0	0	99.26	4707310	10214	24960	294	37
100X	Mut_46	SPAdes	Pass	323	296	99.83	98.93	1	0	0	0	43	0	0	22	4	0	0	99.51	4719465	10245	12805	301	37
20X	Mut_46	SKESA	Pass	290	210	98.19	93.61	10	0	0	0	34	0	0	0	70	0	0	95.21	4514730	9827	217540	283	34
20X	Mut_46	SPAdes	Pass	328	297	99.82	98.93	1	0	0	0	45	0	0	29	1	0	0	99.51	4719471	10282	12799	308	39
40X	Mut_46	SKESA	Pass	294	283	99.84	97.89	0	0	0	0	36	0	0	0	11	0	0	98.82	4686447	10185	45823	294	36
40X	Mut_46	SPAdes	Pass	323	296	99.83	98.93	1	0	0	0	43	0	0	22	4	0	0	99.51	4719438	10245	12832	305	37
60X	Mut_46	SKESA	Pass	294	290	99.88	98.35	0	0	0	0	37	0	0	0	4	0	0	99.2	4704529	10214	27741	294	37
60X	Mut_46	SPAdes	Pass	332	296	99.83	98.93	1	0	0	0	43	0	0	29	6	0	0	99.51	4719434	10276	12836	308	37
80X	Mut_46	SKESA	Pass	294	291	99.88	98.41	0	0	0	0	37	0	0	0	3	0	0	99.25	4706694	10214	25576	294	37
80X	Mut_46	SPAdes	Pass	324	296	99.83	98.93	1	0	0	0	43	0	0	22	5	0	0	99.51	4719465	10245	12805	302	37
100X	Mut_47	SKESA	Pass	292	288	99.88	98.45	0	0	0	0	40	0	0	0	4	0	0	99.26	4707350	10242	24920	292	40
100X	Mut_47	SPAdes	Pass	314	295	99.81	98.93	1	0	0	0	46	0	0	13	5	0	0	99.51	4719464	10366	12806	301	40
20X	Mut_47	SKESA	Pass	286	221	98.31	93.67	6	0	0	0	40	0	0	0	59	0	0	95.17	4512988	9951	219282	281	39
20X	Mut_47	SPAdes	Pass	322	297	99.81	98.93	0	0	0	0	46	0	0	20	5	0	0	99.5	4719161	10370	13109	306	40
40X	Mut_47	SKESA	Pass	290	278	99.86	97.88	0	0	0	0	40	0	0	0	12	0	0	98.78	4684631	10180	47639	290	40
40X	Mut_47	SPAdes	Pass	331	296	99.82	98.93	1	0	0	0	46	0	0	26	8	0	0	99.51	4719470	10391	12800	308	40
60X	Mut_47	SKESA	Pass	292	287	99.88	98.35	0	0	0	0	40	0	0	0	5	0	0	99.2	4704468	10242	27802	292	40
60X	Mut_47	SPAdes	Pass	319	295	99.81	98.93	0	0	0	0	46	0	0	19	5	0	0	99.51	4719565	10366	12705	304	40
80X	Mut_47	SKESA	Pass	292	288	99.9	98.43	0	0	0	0	40	0	0	0	4	0	0	99.25	4706834	10242	25436	292	40
80X	Mut_47	SPAdes	Pass	316	294	99.8	98.93	1	0	0	0	46	0	0	17	4	0	0	99.51	4719492	10335	12778	303	40
100X	Mut_48	SKESA	Pass	291	282	99.9	98.46	0	0	0	0	39	0	0	6	3	0	0	99.26	4707352	10180	24918	289	39
100X	Mut_48	SPAdes	Pass	326	287	99.78	98.91	1	0	0	0	48	0	0	31	7	0	0	99.51	4719502	10292	12768	303	39
20X	Mut_48	SKESA	Pass	291	229	98.22	93.66	3	0	0	0	38	0	0	6	53	0	0	95.19	4514213	10084	218057	287	38
20X	Mut_48	SPAdes	Pass	326	291	99.79	98.92	0	0	0	0	45	0	0	31	4	0	0	99.51	4719285	10331	12985	302	39
40X	Mut_48	SKESA	Pass	292	278	99.89	97.93	0	0	0	0	39	0	0	6	8	0	0	98.8	4685761	10190	46509	289	39
40X	Mut_48	SPAdes	Pass	326	287	99.8	98.93	0	0	0	0	45	0	0	33	6	0	0	99.52	4719702	10292	12568	304	39
60X	Mut_48	SKESA	Pass	291	280	99.88	98.35	0	0	0	0	39	0	0	6	5	0	0	99.2	4704278	10180	27992	289	39
60X	Mut_48	SPAdes	Pass	322	288	99.81	98.93	0	0	0	0	45	0	0	29	5	0	0	99.52	4719678	10292	12592	301	39
80X	Mut_48	SKESA	Pass	291	281	99.9	98.42	0	0	0	0	39	0	0	6	4	0	0	99.24	4706461	10180	25809	289	39
80X	Mut_48	SPAdes	Pass	325	288	99.8	98.94	0	0	0	0	45	0	0	34	3	0	0	99.52	4719702	10292	12568	301	39
100X	Mut_49	SKESA	Pass	298	288	99.9	98.47	0	0	0	0	40	0	0	7	3	0	0	99.25	4707265	10391	25005	296	40
100X	Mut_49	SPAdes	Pass	332	293	99.84	98.93	0	0	0	0	46	0	0	34	5	0	0	99.51	4719298	10399	12972	306	40
20X	Mut_49	SKESA	Pass	293	235	98.25	93.64	4	0	0	0	39	0	0	7	48	0	0	95.16	4513096	10189	219174	289	40
20X	Mut_49	SPAdes	Pass	334	294	99.84	98.93	0	0	0	0	46	0	0	37	3	0	0	99.49	4718726	10449	13544	312	40
40X	Mut_49	SKESA	Pass	302	287	99.86	97.9	0	0	0	0	73	0	0	11	4	0	0	98.78	4685015	10399	47255	297	40
40X	Mut_49	SPAdes	Pass	332	293	99.84	98.93	0	0	0	0	46	0	0	35	4	0	0	99.51	4719257	10430	13013	306	40
60X	Mut_49	SKESA	Pass	298	288	99.88	98.37	0	0	0	0	40	0	0	7	3	0	0	99.2	4704811	10391	27459	296	40
60X	Mut_49	SPAdes	Pass	327	293	99.84	98.93	0	0	0	0	46	0	0	29	5	0	0	99.51	4719298	10399	12972	308	40
80X	Mut_49	SKESA	Pass	298	288	99.9	98.42	0	0	0	0	40	0	0	7	3	0	0	99.23	4706227	10387	26043	295	40
80X	Mut_49	SPAdes	Pass	331	292	99.84	98.93	0	0	0	0	46	0	0	34	5	0	0	99.51	4719298	10399	12972	305	40
100X	Mut_5	SKESA	Pass	294	289	99.91	98.48	0	0	0	0	39	0	0	0	5	0	0	99.27	4707817	10272	24453	294	39
100X	Mut_5	SPAdes	Pass	337	294	99.86	98.94	2	0	0	0	45	0	0	36	6	0	0	99.51	4719449	10272	12821	306	40
20X	Mut_5	SKESA	Pass	284	221	98.09	93.49	2	0	0	0	39	0	0	0	61	0	0	95.18	4513451	9936	218819	283	39
20X	Mut_5	SPAdes	Pass	338	293	99.84	98.93	2	0	0	0	39	0	0	38	6	0	0	99.51	4719135	10281	13135	313	40
40X	Mut_5	SKESA	Pass	290	279	99.87	97.92	0	0	0	0	39	0	0	0	11	0	0	98.81	4686151	10148	46119	290	39
40X	Mut_5	SPAdes	Pass	325	296	99.86	98.95	1	0	0	0	45	0	0	21	8	0	0	99.52	4719627	10303	12643	306	40
60X	Mut_5	SKESA	Pass	294	289	99.9	98.39	0	0	0	0	39	0	0	0	5	0	0	99.21	4705303	10272	26967	294	39
60X	Mut_5	SPAdes	Pass	328	294	99.86	98.94	2	0	0	0	45	0	0	28	5	0	0	99.52	4719599	10303	12671	308	40
80X	Mut_5	SKESA	Pass	294	289	99.9	98.44	0	0	0	0	39	0	0	0	5	0	0	99.25	4706993	10272	25277	294	39
80X	Mut_5	SPAdes	Pass	317	297	99.86	98.94	2	0	0	0	45	0	0	13	6	0	0	99.52	4719599	10303	12671	304	40
100X	Mut_50	SKESA	Pass	297	294	99.9	98.49	0	0	0	0	40	0	0	0	3	0	0	99.27	4707992	10400	24278	297	40
100X	Mut_50	SPAdes	Pass	326	300	99.83	98.94	0	0	0	0	45	0	0	20	6	0	0	99.51	4719316	10432	12954	311	39
20X	Mut_50	SKESA	Pass	292	232	98.18	93.64	6	0	0	0	37	0	0	0	55	0	0	95.23	4516148	10045	216122	287	37
20X	Mut_50	SPAdes	Pass	325	307	99.83	98.92	0	0	0	0	45	0	0	14	4	0	0	99.49	4718700	10425	13570	308	39
40X	Mut_50	SKESA	Pass	301	288	99.88	97.94	0	0	0	0	72	0	0	4	9	0	0	98.81	4686339	10370	45931	298	39
40X	Mut_50	SPAdes	Pass	328	301	99.84	98.93	0	0	0	0	45	0	0	21	6	0	0	99.51	4719316	10432	12954	309	39
60X	Mut_50	SKESA	Pass	297	294	99.89	98.37	0	0	0	0	39	0	0	0	3	0	0	99.21	4705006	10370	27264	297	39
60X	Mut_50	SPAdes	Pass	326	303	99.82	98.93	0	0	0	0	45	0	0	18	5	0	0	99.51	4719378	10432	12892	311	39
80X	Mut_50	SKESA	Pass	297	294	99.9	98.45	0	0	0	0	39	0	0	0	3	0	0	99.25	4707033	10370	25237	297	39
80X	Mut_50	SPAdes	Pass	317	300	99.83	98.93	0	0	0	0	45	0	0	13	4	0	0	99.51	4719304	10401	12966	304	39
100X	Mut_51	SKESA	Pass	297	292	99.9	98.47	0	0	0	0	39	0	0	2	3	0	0	99.26	4707644	10326	24626	295	38
100X	Mut_51	SPAdes	Pass	336	294	99.83	98.93	3	0	0	0	45	0	0	36	3	0	0	99.51	4719334	10374	12936	311	39
20X	Mut_51	SKESA	Pass	294	218	98.26	93.65	7	0	0	0	37	0	0	2	68	0	0	95.18	4513578	10039	218692	288	37
20X	Mut_51	SPAdes	Pass	327	301	99.83	98.94	0	0	0	0	45	0	0	21	5	0	0	99.51	4719268	10374	13002	304	39
40X	Mut_51	SKESA	Pass	296	282	99.85	97.88	0	0	0	0	38	0	0	2	12	0	0	98.79	4685198	10283	47072	294	38
40X	Mut_51	SPAdes	Pass	323	298	99.84	98.94	0	0	0	0	45	0	0	21	4	0	0	99.51	4719354	10374	12916	302	39
60X	Mut_51	SKESA	Pass	296	291	99.9	98.37	0	0	0	0	39	0	0	2	3	0	0	99.2	4704560	10295	27710	294	38
60X	Mut_51	SPAdes	Pass	330	298	99.83	98.94	0	0	0	0	45	0	0	28	4	0	0	99.51	4719365	10374	12905	306	39
80X	Mut_51	SKESA	Pass	297	291	99.9	98.44	0	0	0	0	39	0	0	2	4	0	0	99.24	4706596	10326	25674	295	38
80X	Mut_51	SPAdes	Pass	335	294	99.83	98.94	0	0	0	0	45	0	0	36	5	0	0	99.51	4719365	10374	12905	311	39
100X	Mut_52	SKESA	Pass	298	292	99.9	98.47	0	0	0	0	39	0	0	2	4	0	0	99.26	4707674	10377	24596	296	39
100X	Mut_52	SPAdes	Pass	325	297	99.83	98.94	0	0	0	0	45	0	0	24	4	0	0	99.51	4719361	10408	12909	305	39
20X	Mut_52	SKESA	Pass	294	227	98.33	93.67	6	0	0	0	37	0	0	2	60	0	0	95.14	4511738	10120	220532	288	37
20X	Mut_52	SPAdes	Pass	327	298	99.82	98.93	0	0	0	0	43	0	0	24	5	0	0	99.51	4719277	10416	12993	306	39
40X	Mut_52	SKESA	Pass	297	286	99.85	97.88	0	0	0	0	39	0	0	2	9	0	0	98.78	4684918	10346	47352	295	39
40X	Mut_52	SPAdes	Pass	328	297	99.84	98.94	0	0	0	0	45	0	0	24	7	0	0	99.51	4719322	10408	12948	311	39
60X	Mut_52	SKESA	Pass	298	291	99.9	98.39	0	0	0	0	39	0	0	2	5	0	0	99.21	4704955	10377	27315	296	39
60X	Mut_52	SPAdes	Pass	325	297	99.83	98.93	0	0	0	0	45	0	0	24	4	0	0	99.51	4719259	10408	13011	305	39
80X	Mut_52	SKESA	Pass	298	292	99.91	98.45	0	0	0	0	39	0	0	2	4	0	0	99.25	4706867	10377	25403	296	39
80X	Mut_52	SPAdes	Pass	334	299	99.84	98.93	0	0	0	0	45	0	0	31	4	0	0	99.51	4719328	10408	12942	312	39
100X	Mut_53	SKESA	Pass	298	294	99.89	98.46	0	0	0	0	39	0	0	0	4	0	0	99.26	4707516	10393	24754	298	39
100X	Mut_53	SPAdes	Pass	329	301	99.83	98.93	0	0	0	0	45	0	0	25	3	0	0	99.5	4719194	10424	13076	310	39
20X	Mut_53	SKESA	Pass	294	221	98.17	93.56	6	0	0	0	38	0	0	0	68	0	0	95.17	4513280	10223	218990	293	38
20X	Mut_53	SPAdes	Pass	347	303	99.83	98.93	0	0	0	0	45	0	0	39	5	0	0	99.5	4719018	10434	13252	314	39
40X	Mut_53	SKESA	Pass	295	281	99.85	97.93	0	0	0	0	39	0	0	0	14	0	0	98.83	4687044	10293	45226	295	39
40X	Mut_53	SPAdes	Pass	325	300	99.85	98.94	0	0	0	0	45	0	0	21	4	0	0	99.51	4719326	10424	12944	306	39
60X	Mut_53	SKESA	Pass	298	292	99.89	98.37	0	0	0	0	39	0	0	0	6	0	0	99.2	4704606	10393	27664	298	39
60X	Mut_53	SPAdes	Pass	330	300	99.83	98.93	0	0	0	0	45	0	0	24	6	0	0	99.5	4719194	10424	13076	308	39
80X	Mut_53	SKESA	Pass	298	293	99.9	98.44	0	0	0	0	39	0	0	0	5	0	0	99.25	4706883	10393	25387	298	39
80X	Mut_53	SPAdes	Pass	328	300	99.83	98.93	0	0	0	0	45	0	0	25	3	0	0	99.51	4719225	10424	13045	309	39
100X	Mut_54	SKESA	Pass	296	295	99.88	98.44	0	0	0	0	40	0	0	0	1	0	0	99.25	4707077	10372	25193	296	40
100X	Mut_54	SPAdes	Pass	326	298	99.83	98.93	0	0	0	0	46	0	0	24	4	0	0	99.51	4719316	10403	12954	309	40
20X	Mut_54	SKESA	Pass	291	223	98.21	93.59	3	0	0	0	37	0	0	2	63	0	0	95.17	4513221	10023	219049	286	36
20X	Mut_54	SPAdes	Pass	339	303	99.82	98.93	0	0	0	0	46	0	0	31	5	0	0	99.5	4719014	10442	13256	315	40
40X	Mut_54	SKESA	Pass	296	290	99.84	97.86	0	0	0	0	40	0	0	0	6	0	0	98.77	4684234	10372	48036	296	40
40X	Mut_54	SPAdes	Pass	335	298	99.84	98.93	0	0	0	0	46	0	0	36	1	0	0	99.51	4719344	10372	12926	307	40
60X	Mut_54	SKESA	Pass	296	292	99.87	98.34	0	0	0	0	40	0	0	0	4	0	0	99.19	4704157	10372	28113	296	40
60X	Mut_54	SPAdes	Pass	333	300	99.84	98.93	0	0	0	0	46	0	0	30	3	0	0	99.51	4719347	10372	12923	313	40
80X	Mut_54	SKESA	Pass	296	294	99.87	98.4	0	0	0	0	40	0	0	0	2	0	0	99.24	4706438	10372	25832	296	40
80X	Mut_54	SPAdes	Pass	323	298	99.83	98.93	0	0	0	0	46	0	0	19	6	0	0	99.51	4719313	10403	12957	308	40
100X	Mut_55	SKESA	Pass	297	295	99.91	98.47	0	0	0	0	39	0	0	0	2	0	0	99.25	4707264	10352	25006	296	38
100X	Mut_55	SPAdes	Pass	319	299	99.83	98.93	1	0	0	0	46	0	0	18	1	0	0	99.51	4719286	10382	12984	304	39
20X	Mut_55	SKESA	Pass	291	226	98.07	93.39	10	0	0	0	36	0	0	0	57	0	0	95.08	4508807	10057	223463	287	37
20X	Mut_55	SPAdes	Pass	335	301	99.86	98.93	2	0	0	0	46	0	0	28	4	0	0	99.5	4718963	10382	13307	312	39
40X	Mut_55	SKESA	Pass	302	286	99.88	97.95	0	0	0	0	72	0	0	4	12	0	0	98.82	4686861	10383	45409	298	38
40X	Mut_55	SPAdes	Pass	330	301	99.84	98.93	0	0	0	0	45	0	0	28	1	0	0	99.51	4719339	10352	12931	307	38
60X	Mut_55	SKESA	Pass	297	295	99.91	98.4	0	0	0	0	39	0	0	0	2	0	0	99.21	4705136	10352	27134	296	38
60X	Mut_55	SPAdes	Pass	319	299	99.83	98.93	1	0	0	0	46	0	0	18	1	0	0	99.51	4719268	10382	13002	304	39
80X	Mut_55	SKESA	Pass	297	295	99.91	98.44	0	0	0	0	39	0	0	0	2	0	0	99.24	4706593	10352	25677	296	38
80X	Mut_55	SPAdes	Pass	328	302	99.83	98.93	0	0	0	0	46	0	0	24	2	0	0	99.51	4719309	10382	12961	309	39
100X	Mut_56	SKESA	Pass	294	293	99.9	98.48	0	0	0	0	40	0	0	0	1	0	0	99.28	4708201	10306	24069	294	40
100X	Mut_56	SPAdes	Pass	331	296	99.81	98.93	0	0	0	0	46	0	0	31	4	0	0	99.51	4719473	10368	12797	311	40
20X	Mut_56	SKESA	Pass	286	217	98.39	93.8	6	0	0	0	39	0	0	0	64	0	0	95.22	4515743	9971	216527	282	40
20X	Mut_56	SPAdes	Pass	335	297	99.81	98.93	0	0	0	0	46	0	0	35	3	0	0	99.51	4719233	10341	13037	311	40
40X	Mut_56	SKESA	Pass	296	280	99.85	97.89	2	0	0	0	73	0	0	4	10	0	0	98.79	4685308	10192	46962	290	40
40X	Mut_56	SPAdes	Pass	328	296	99.79	98.92	0	0	0	0	46	0	0	29	3	0	0	99.51	4719504	10337	12766	306	40
60X	Mut_56	SKESA	Pass	294	292	99.88	98.37	0	0	0	0	40	0	0	0	2	0	0	99.2	4704848	10306	27422	294	40
60X	Mut_56	SPAdes	Pass	327	298	99.82	98.93	0	0	0	0	46	0	0	23	6	0	0	99.51	4719467	10368	12803	309	40
80X	Mut_56	SKESA	Pass	294	293	99.9	98.44	0	0	0	0	40	0	0	0	1	0	0	99.25	4706913	10306	25357	294	40
80X	Mut_56	SPAdes	Pass	325	297	99.82	98.93	0	0	0	0	46	0	0	25	3	0	0	99.51	4719473	10368	12797	307	40
100X	Mut_57	SKESA	Pass	295	289	99.9	98.46	0	0	0	0	40	0	0	4	2	0	0	99.25	4706925	10276	25345	290	39
100X	Mut_57	SPAdes	Pass	338	294	99.83	98.93	0	0	0	0	46	0	0	39	5	0	0	99.51	4719242	10338	13028	308	39
20X	Mut_57	SKESA	Pass	292	227	98.17	93.47	6	0	0	0	38	0	0	4	56	0	0	95.06	4508264	10043	224006	282	39
20X	Mut_57	SPAdes	Pass	336	293	99.84	98.94	0	0	0	0	46	0	0	36	7	0	0	99.51	4719263	10338	13007	302	39
40X	Mut_57	SKESA	Pass	299	282	99.85	97.88	0	0	0	0	73	0	0	9	8	0	0	98.79	4685102	10276	47168	291	39
40X	Mut_57	SPAdes	Pass	322	296	99.82	98.93	0	0	0	0	46	0	0	22	4	0	0	99.51	4719412	10338	12858	302	39
60X	Mut_57	SKESA	Pass	294	285	99.9	98.37	0	0	0	0	40	0	0	4	5	0	0	99.2	4704504	10245	27766	289	39
60X	Mut_57	SPAdes	Pass	339	292	99.83	98.92	0	0	0	0	46	0	0	41	6	0	0	99.51	4719235	10338	13035	307	39
80X	Mut_57	SKESA	Pass	294	287	99.9	98.42	0	0	0	0	40	0	0	4	3	0	0	99.23	4705949	10245	26321	289	39
80X	Mut_57	SPAdes	Pass	327	294	99.83	98.93	0	0	0	0	46	0	0	28	5	0	0	99.51	4719423	10338	12847	304	39
100X	Mut_58	SKESA	Pass	297	294	99.9	98.46	0	0	0	0	40	0	0	0	3	0	0	99.25	4707133	10397	25137	297	40
100X	Mut_58	SPAdes	Pass	331	300	99.83	98.93	1	0	0	0	46	0	0	28	2	0	0	99.51	4719287	10428	12983	309	40
20X	Mut_58	SKESA	Pass	300	235	98.27	93.69	3	0	0	0	40	0	0	0	62	0	0	95.19	4514516	10436	217754	298	39
20X	Mut_58	SPAdes	Pass	351	303	99.81	98.91	1	0	0	0	46	0	0	42	5	0	0	99.49	4718357	10453	13913	316	40
40X	Mut_58	SKESA	Pass	301	289	99.86	97.9	0	0	0	0	73	0	0	4	8	0	0	98.8	4685764	10397	46506	298	40
40X	Mut_58	SPAdes	Pass	330	300	99.84	98.93	1	0	0	0	46	0	0	28	1	0	0	99.51	4719270	10428	13000	308	40
60X	Mut_58	SKESA	Pass	297	294	99.88	98.35	0	0	0	0	40	0	0	0	3	0	0	99.19	4704315	10397	27955	297	40
60X	Mut_58	SPAdes	Pass	333	301	99.84	98.93	1	0	0	0	46	0	0	30	1	0	0	99.51	4719283	10430	12987	311	40
80X	Mut_58	SKESA	Pass	297	294	99.89	98.41	0	0	0	0	40	0	0	0	3	0	0	99.23	4706173	10397	26097	297	40
80X	Mut_58	SPAdes	Pass	322	300	99.83	98.93	1	0	0	0	46	0	0	19	2	0	0	99.51	4719285	10428	12985	305	40
100X	Mut_59	SKESA	Pass	300	292	99.9	98.47	0	0	0	0	39	0	0	0	8	0	0	99.26	4707633	10437	24637	299	39
100X	Mut_59	SPAdes	Pass	332	299	99.83	98.93	0	0	0	0	45	0	0	27	6	0	0	99.51	4719322	10461	12948	310	39
20X	Mut_59	SKESA	Pass	293	222	98.03	93.4	8	0	0	0	36	0	0	0	65	0	0	95.13	4511326	10124	220944	288	38
20X	Mut_59	SPAdes	Pass	338	301	99.81	98.91	0	0	0	0	45	0	0	30	7	0	0	99.5	4718822	10482	13448	315	39
40X	Mut_59	SKESA	Pass	295	288	99.85	97.91	0	0	0	0	39	0	0	0	7	0	0	98.83	4686872	10306	45398	295	39
40X	Mut_59	SPAdes	Pass	322	301	99.84	98.93	0	0	0	0	45	0	0	13	8	0	0	99.51	4719321	10461	12949	307	39
60X	Mut_59	SKESA	Pass	297	292	99.89	98.37	0	0	0	0	39	0	0	0	5	0	0	99.2	4704673	10358	27597	297	39
60X	Mut_59	SPAdes	Pass	340	300	99.84	98.93	0	0	0	0	45	0	0	36	4	0	0	99.5	4719134	10461	13136	311	39
80X	Mut_59	SKESA	Pass	298	292	99.89	98.44	0	0	0	0	39	0	0	0	6	0	0	99.25	4706960	10389	25310	298	39
80X	Mut_59	SPAdes	Pass	340	302	99.83	98.93	0	0	0	0	45	0	0	31	7	0	0	99.5	4719169	10461	13101	316	39
100X	Mut_6	SKESA	Pass	292	289	99.9	98.46	0	0	0	0	39	0	0	0	3	0	0	99.26	4707408	10201	24862	292	39
100X	Mut_6	SPAdes	Pass	328	294	99.83	98.93	0	0	0	0	45	0	0	29	5	0	0	99.52	4719561	10233	12709	308	39
20X	Mut_6	SKESA	Pass	280	211	98.34	93.69	3	0	0	0	38	0	0	0	66	0	0	95.13	4511177	9773	221093	279	38
20X	Mut_6	SPAdes	Pass	317	295	99.81	98.91	0	0	0	0	45	0	0	19	3	0	0	99.51	4719483	10242	12787	298	39
40X	Mut_6	SKESA	Pass	290	279	99.85	97.91	1	0	0	0	38	0	0	0	10	0	0	98.83	4686787	10110	45483	290	38
40X	Mut_6	SPAdes	Pass	331	295	99.84	98.93	0	0	0	0	45	0	0	30	6	0	0	99.52	4719560	10232	12710	303	39
60X	Mut_6	SKESA	Pass	291	289	99.9	98.37	0	0	0	0	39	0	0	0	2	0	0	99.2	4704555	10170	27715	291	39
60X	Mut_6	SPAdes	Pass	326	296	99.84	98.93	0	0	0	0	45	0	0	26	4	0	0	99.52	4719560	10232	12710	306	39
80X	Mut_6	SKESA	Pass	292	289	99.9	98.42	0	0	0	0	39	0	0	0	3	0	0	99.24	4706442	10201	25828	292	39
80X	Mut_6	SPAdes	Pass	323	294	99.83	98.93	0	0	0	0	45	0	0	24	5	0	0	99.52	4719560	10232	12710	305	39
100X	Mut_60	SKESA	Pass	299	297	99.89	98.46	0	0	0	0	39	0	0	0	2	0	0	99.26	4707389	10427	24881	299	39
100X	Mut_60	SPAdes	Pass	330	301	99.8	98.94	0	0	0	0	39	0	0	24	5	0	0	99.51	4719338	10458	12932	317	39
20X	Mut_60	SKESA	Pass	298	228	98.25	93.6	3	0	0	0	38	0	0	0	67	0	0	95.12	4511058	10321	221212	298	38
20X	Mut_60	SPAdes	Pass	335	302	99.83	98.93	3	0	0	0	39	0	0	25	5	0	0	99.5	4719021	10484	13249	316	39
40X	Mut_60	SKESA	Pass	301	288	99.87	97.91	0	0	0	0	71	0	0	4	9	0	0	98.8	4685783	10336	46487	298	38
40X	Mut_60	SPAdes	Pass	324	301	99.82	98.94	0	0	0	0	39	0	0	18	5	0	0	99.51	4719428	10458	12842	315	39
60X	Mut_60	SKESA	Pass	298	295	99.88	98.36	0	0	0	0	39	0	0	0	3	0	0	99.2	4704744	10396	27526	298	39
60X	Mut_60	SPAdes	Pass	321	301	99.82	98.94	0	0	0	0	39	0	0	13	7	0	0	99.51	4719453	10489	12817	314	39
80X	Mut_60	SKESA	Pass	299	296	99.91	98.44	0	0	0	0	39	0	0	0	3	0	0	99.24	4706506	10427	25764	299	39
80X	Mut_60	SPAdes	Pass	323	301	99.82	98.94	0	0	0	0	39	0	0	16	6	0	0	99.51	4719423	10458	12847	312	39
100X	Mut_61	SKESA	Pass	294	292	99.9	98.47	0	0	0	0	39	0	0	0	2	0	0	99.26	4707602	10272	24668	294	39
100X	Mut_61	SPAdes	Pass	330	297	99.84	98.93	0	0	0	0	45	0	0	30	3	0	0	99.51	4719485	10272	12785	305	39
20X	Mut_61	SKESA	Pass	284	234	98.33	93.76	5	0	0	0	38	0	0	0	46	0	0	95.21	4515066	9856	217204	280	38
20X	Mut_61	SPAdes	Pass	322	302	99.84	98.9	2	0	0	0	45	0	0	12	6	0	0	99.5	4719071	10296	13199	309	39
40X	Mut_61	SKESA	Pass	290	283	99.85	97.89	0	0	0	0	39	0	0	0	7	0	0	98.8	4685525	10145	46745	290	39
40X	Mut_61	SPAdes	Pass	324	296	99.85	98.94	0	0	0	0	45	0	0	23	5	0	0	99.51	4719485	10272	12785	304	39
60X	Mut_61	SKESA	Pass	291	289	99.87	98.35	0	0	0	0	39	0	0	0	2	0	0	99.2	4704566	10179	27704	291	39
60X	Mut_61	SPAdes	Pass	331	298	99.85	98.94	0	0	0	0	45	0	0	30	3	0	0	99.51	4719485	10272	12785	306	39
80X	Mut_61	SKESA	Pass	293	290	99.88	98.41	0	0	0	0	39	0	0	0	3	0	0	99.24	4706434	10241	25836	293	39
80X	Mut_61	SPAdes	Pass	332	298	99.84	98.93	0	0	0	0	45	0	0	30	4	0	0	99.51	4719454	10303	12816	307	39
100X	Mut_62	SKESA	Pass	296	293	99.9	98.46	0	0	0	0	40	0	0	0	3	0	0	99.25	4707235	10351	25035	295	40
100X	Mut_62	SPAdes	Pass	320	298	99.83	98.93	0	0	0	0	46	0	0	20	2	0	0	99.51	4719337	10402	12933	307	40
20X	Mut_62	SKESA	Pass	289	219	98.25	93.65	4	0	0	0	40	0	0	0	66	0	0	95.18	4513610	10026	218660	285	38
20X	Mut_62	SPAdes	Pass	343	302	99.81	98.94	0	0	0	0	45	0	0	37	4	0	0	99.51	4719353	10403	12917	311	40
40X	Mut_62	SKESA	Pass	298	290	99.83	97.87	1	0	0	0	73	0	0	4	3	0	0	98.78	4684875	10309	47395	295	40
40X	Mut_62	SPAdes	Pass	317	302	99.83	98.93	0	0	0	0	46	0	0	13	2	0	0	99.51	4719334	10402	12936	304	40
60X	Mut_62	SKESA	Pass	295	293	99.88	98.36	0	0	0	0	40	0	0	0	2	0	0	99.2	4704601	10340	27669	295	40
60X	Mut_62	SPAdes	Pass	318	298	99.83	98.93	0	0	0	0	46	0	0	17	3	0	0	99.51	4719328	10402	12942	305	40
80X	Mut_62	SKESA	Pass	296	293	99.9	98.42	0	0	0	0	40	0	0	0	3	0	0	99.23	4706290	10351	25980	295	40
80X	Mut_62	SPAdes	Pass	320	298	99.83	98.93	0	0	0	0	46	0	0	20	2	0	0	99.51	4719337	10402	12933	307	40
100X	Mut_63	SKESA	Pass	289	286	99.89	98.45	0	0	0	0	40	0	0	0	3	0	0	99.25	4707071	10138	25199	288	39
100X	Mut_63	SPAdes	Pass	323	292	99.81	98.93	1	0	0	0	46	0	0	24	6	0	0	99.52	4719635	10231	12635	304	39
20X	Mut_63	SKESA	Pass	280	222	98.17	93.58	6	0	0	0	36	0	0	0	53	0	0	95.18	4513394	9713	218876	277	36
20X	Mut_63	SPAdes	Pass	331	292	99.78	98.91	0	0	0	0	46	0	0	35	4	0	0	99.51	4719177	10233	13093	306	39
40X	Mut_63	SKESA	Pass	292	278	99.86	97.89	0	0	0	0	72	0	0	4	10	0	0	98.79	4685122	10065	47148	288	38
40X	Mut_63	SPAdes	Pass	320	290	99.82	98.93	1	0	0	0	46	0	0	24	5	0	0	99.52	4719619	10231	12651	300	39
60X	Mut_63	SKESA	Pass	289	286	99.89	98.35	0	0	0	0	40	0	0	0	3	0	0	99.2	4704255	10138	28015	288	39
60X	Mut_63	SPAdes	Pass	327	291	99.82	98.93	1	0	0	0	46	0	0	27	8	0	0	99.52	4719666	10231	12604	306	39
80X	Mut_63	SKESA	Pass	289	286	99.89	98.41	0	0	0	0	40	0	0	0	3	0	0	99.23	4706098	10138	26172	288	39
80X	Mut_63	SPAdes	Pass	322	292	99.81	98.93	1	0	0	0	46	0	0	24	5	0	0	99.52	4719607	10264	12663	303	39
100X	Mut_64	SKESA	Pass	295	292	99.91	98.48	0	0	0	0	39	0	0	0	3	0	0	99.27	4707926	10294	24344	295	39
100X	Mut_64	SPAdes	Pass	327	298	99.86	98.94	1	0	0	0	46	0	0	26	2	0	0	99.51	4719504	10355	12766	305	40
20X	Mut_64	SKESA	Pass	281	222	98.2	93.59	8	0	0	0	36	0	0	0	53	0	0	95.19	4513750	9779	218520	278	38
20X	Mut_64	SPAdes	Pass	336	299	99.87	98.93	1	0	0	0	46	0	0	31	5	0	0	99.5	4719031	10358	13239	303	40
40X	Mut_64	SKESA	Pass	292	289	99.86	97.9	0	0	0	0	39	0	0	0	3	0	0	98.8	4685447	10201	46823	292	39
40X	Mut_64	SPAdes	Pass	328	298	99.86	98.94	1	0	0	0	46	0	0	28	1	0	0	99.51	4719393	10355	12877	306	40
60X	Mut_64	SKESA	Pass	295	292	99.88	98.36	0	0	0	0	39	0	0	0	3	0	0	99.21	4704966	10294	27304	295	39
60X	Mut_64	SPAdes	Pass	328	298	99.86	98.95	1	0	0	0	46	0	0	28	1	0	0	99.51	4719504	10355	12766	306	40
80X	Mut_64	SKESA	Pass	295	292	99.89	98.43	0	0	0	0	39	0	0	0	3	0	0	99.25	4707008	10294	25262	295	39
80X	Mut_64	SPAdes	Pass	327	298	99.86	98.94	1	0	0	0	46	0	0	26	2	0	0	99.51	4719504	10355	12766	305	40
100X	Mut_65	SKESA	Pass	296	292	99.9	98.47	0	0	0	0	40	0	0	2	2	0	0	99.26	4707573	10328	24697	294	40
100X	Mut_65	SPAdes	Pass	327	297	99.83	98.94	0	0	0	0	46	0	0	26	4	0	0	99.51	4719335	10421	12935	310	40
20X	Mut_65	SKESA	Pass	300	215	98.25	93.62	4	0	0	0	40	0	0	9	72	0	0	95.11	4510637	10212	221633	289	40
20X	Mut_65	SPAdes	Pass	348	297	99.85	98.93	0	0	0	0	46	0	0	43	8	0	0	99.49	4718708	10421	13562	314	40
40X	Mut_65	SKESA	Pass	295	290	99.86	97.89	0	0	0	0	40	0	0	2	3	0	0	98.79	4685019	10313	47251	293	40
40X	Mut_65	SPAdes	Pass	319	297	99.83	98.93	0	0	0	0	46	0	0	15	7	0	0	99.51	4719335	10421	12935	304	40
60X	Mut_65	SKESA	Pass	296	292	99.89	98.37	0	0	0	0	40	0	0	2	2	0	0	99.2	4704648	10328	27622	294	40
60X	Mut_65	SPAdes	Pass	322	297	99.83	98.93	0	0	0	0	46	0	0	20	5	0	0	99.51	4719330	10421	12940	305	40
80X	Mut_65	SKESA	Pass	296	292	99.9	98.44	0	0	0	0	40	0	0	2	2	0	0	99.24	4706690	10328	25580	294	40
80X	Mut_65	SPAdes	Pass	328	297	99.83	98.94	0	0	0	0	46	0	0	24	7	0	0	99.51	4719331	10421	12939	304	40
100X	Mut_66	SKESA	Pass	293	288	99.9	98.46	0	0	0	0	40	0	0	4	1	0	0	99.26	4707432	10219	24838	289	40
100X	Mut_66	SPAdes	Pass	323	292	99.81	98.92	1	0	0	0	46	0	0	28	2	0	0	99.51	4719477	10312	12793	300	40
20X	Mut_66	SKESA	Pass	291	213	98.17	93.57	7	0	0	0	38	0	0	4	69	0	0	95.19	4514196	10062	218074	281	39
20X	Mut_66	SPAdes	Pass	334	295	99.83	98.93	1	0	0	0	46	0	0	34	4	0	0	99.51	4719354	10312	12916	307	40
40X	Mut_66	SKESA	Pass	293	284	99.86	97.89	0	0	0	0	39	0	0	4	5	0	0	98.79	4684929	10189	47341	289	39
40X	Mut_66	SPAdes	Pass	327	293	99.82	98.93	1	0	0	0	46	0	0	28	5	0	0	99.51	4719422	10352	12848	303	40
60X	Mut_66	SKESA	Pass	293	287	99.89	98.36	0	0	0	0	40	0	0	4	2	0	0	99.2	4704426	10219	27844	289	40
60X	Mut_66	SPAdes	Pass	328	293	99.82	98.93	1	0	0	0	46	0	0	32	2	0	0	99.51	4719467	10343	12803	306	40
80X	Mut_66	SKESA	Pass	293	288	99.89	98.42	0	0	0	0	40	0	0	4	1	0	0	99.24	4706438	10219	25832	289	40
80X	Mut_66	SPAdes	Pass	327	292	99.82	98.92	1	0	0	0	46	0	0	32	2	0	0	99.51	4719472	10281	12798	305	40
100X	Mut_67	SKESA	Pass	293	291	99.91	98.48	0	0	0	0	40	0	0	0	2	0	0	99.26	4707491	10245	24779	291	40
100X	Mut_67	SPAdes	Pass	333	298	99.84	98.93	0	0	0	0	46	0	0	32	3	0	0	99.51	4719390	10342	12880	307	40
20X	Mut_67	SKESA	Pass	289	219	98.12	93.48	9	0	0	0	39	0	0	0	62	0	0	95.11	4510271	10045	221999	284	40
20X	Mut_67	SPAdes	Pass	343	300	99.83	98.93	0	0	0	0	46	0	0	40	3	0	0	99.5	4719091	10416	13179	309	40
40X	Mut_67	SKESA	Pass	292	284	99.83	97.86	0	0	0	0	40	0	0	0	8	0	0	98.79	4685095	10214	47175	290	40
40X	Mut_67	SPAdes	Pass	329	299	99.85	98.95	1	0	0	0	46	0	0	26	3	0	0	99.51	4719390	10342	12880	307	40
60X	Mut_67	SKESA	Pass	292	290	99.9	98.37	0	0	0	0	40	0	0	0	2	0	0	99.2	4704613	10214	27657	290	40
60X	Mut_67	SPAdes	Pass	333	298	99.85	98.93	0	0	0	0	46	0	0	32	3	0	0	99.51	4719390	10342	12880	311	40
80X	Mut_67	SKESA	Pass	293	291	99.9	98.44	0	0	0	0	40	0	0	0	2	0	0	99.25	4706785	10245	25485	291	40
80X	Mut_67	SPAdes	Pass	333	297	99.85	98.93	0	0	0	0	46	0	0	32	4	0	0	99.51	4719390	10342	12880	307	40
100X	Mut_68	SKESA	Pass	296	296	99.89	98.45	0	0	0	0	40	0	0	0	0	0	0	99.25	4706907	10368	25363	296	40
100X	Mut_68	SPAdes	Pass	330	300	99.84	98.93	0	0	0	0	46	0	0	24	6	0	0	99.51	4719328	10368	12942	311	40
20X	Mut_68	SKESA	Pass	291	233	98.24	93.7	6	0	0	0	39	0	0	0	53	0	0	95.24	4516819	10147	215451	290	39
20X	Mut_68	SPAdes	Pass	336	301	99.84	98.93	0	0	0	0	46	0	0	33	2	0	0	99.5	4719038	10458	13232	314	40
40X	Mut_68	SKESA	Pass	300	294	99.87	97.95	0	0	0	0	73	0	0	4	2	0	0	98.84	4687684	10368	44586	297	40
40X	Mut_68	SPAdes	Pass	329	299	99.84	98.93	0	0	0	0	46	0	0	28	2	0	0	99.51	4719302	10368	12968	311	40
60X	Mut_68	SKESA	Pass	296	296	99.88	98.35	0	0	0	0	40	0	0	0	0	0	0	99.19	4704386	10368	27884	296	40
60X	Mut_68	SPAdes	Pass	327	299	99.83	98.93	0	0	0	0	46	0	0	24	4	0	0	99.51	4719328	10368	12942	308	40
80X	Mut_68	SKESA	Pass	296	296	99.89	98.42	0	0	0	0	40	0	0	0	0	0	0	99.24	4706457	10368	25813	296	40
80X	Mut_68	SPAdes	Pass	328	301	99.84	98.93	0	0	0	0	46	0	0	22	5	0	0	99.51	4719328	10368	12942	309	40
100X	Mut_69	SKESA	Pass	298	295	99.91	98.49	0	0	0	0	40	0	0	0	3	0	0	99.27	4707893	10381	24377	296	39
100X	Mut_69	SPAdes	Pass	329	299	99.83	98.94	0	0	0	0	44	0	0	26	4	0	0	99.51	4719418	10397	12852	311	39
20X	Mut_69	SKESA	Pass	285	222	98.24	93.65	7	0	0	0	36	0	0	0	58	0	0	95.21	4514740	9757	217530	276	38
20X	Mut_69	SPAdes	Pass	328	301	99.84	98.92	1	0	0	0	44	0	0	22	4	0	0	99.5	4718854	10420	13416	305	39
40X	Mut_69	SKESA	Pass	298	292	99.86	97.92	0	0	0	0	72	0	0	4	2	0	0	98.82	4686612	10254	45658	294	39
40X	Mut_69	SPAdes	Pass	326	302	99.84	98.96	0	0	0	0	44	0	0	21	3	0	0	99.51	4719370	10427	12900	310	39
60X	Mut_69	SKESA	Pass	296	294	99.9	98.4	0	0	0	0	39	0	0	0	2	0	0	99.22	4705406	10316	26864	295	39
60X	Mut_69	SPAdes	Pass	325	300	99.81	98.92	0	0	0	0	44	0	0	22	3	0	0	99.51	4719418	10397	12852	309	39
80X	Mut_69	SKESA	Pass	298	295	99.9	98.47	0	0	0	0	40	0	0	0	3	0	0	99.26	4707598	10376	24672	296	39
80X	Mut_69	SPAdes	Pass	330	299	99.83	98.94	0	0	0	0	44	0	0	26	5	0	0	99.51	4719407	10397	12863	312	39
100X	Mut_7	SKESA	Pass	297	294	99.89	98.46	0	0	0	0	39	0	0	0	3	0	0	99.26	4707420	10368	24850	297	39
100X	Mut_7	SPAdes	Pass	320	300	99.83	98.93	0	0	0	0	45	0	0	13	7	0	0	99.51	4719439	10399	12831	307	39
20X	Mut_7	SKESA	Pass	280	214	98.2	93.62	5	0	0	0	38	0	0	0	62	0	0	95.24	4516181	9677	216089	274	39
20X	Mut_7	SPAdes	Pass	337	300	99.84	98.93	3	0	0	0	45	0	0	28	6	0	0	99.5	4719090	10377	13180	315	39
40X	Mut_7	SKESA	Pass	296	286	99.83	97.88	1	0	0	0	72	0	0	4	5	0	0	98.81	4686100	10213	46170	293	39
40X	Mut_7	SPAdes	Pass	335	298	99.84	98.92	0	0	0	0	45	0	0	32	5	0	0	99.51	4719292	10368	12978	308	39
60X	Mut_7	SKESA	Pass	297	293	99.89	98.38	0	0	0	0	39	0	0	0	4	0	0	99.21	4705122	10368	27148	297	39
60X	Mut_7	SPAdes	Pass	326	299	99.83	98.93	0	0	0	0	45	0	0	23	4	0	0	99.51	4719439	10399	12831	308	39
80X	Mut_7	SKESA	Pass	297	293	99.9	98.44	0	0	0	0	39	0	0	0	4	0	0	99.25	4707000	10368	25270	297	39
80X	Mut_7	SPAdes	Pass	325	298	99.83	98.93	0	0	0	0	45	0	0	20	7	0	0	99.51	4719437	10399	12833	310	39
100X	Mut_70	SKESA	Pass	297	296	99.9	98.46	0	0	0	0	39	0	0	0	1	0	0	99.25	4707032	10360	25238	297	39
100X	Mut_70	SPAdes	Pass	330	301	99.84	98.95	0	0	0	0	46	0	0	26	3	0	0	99.51	4719339	10422	12931	312	40
20X	Mut_70	SKESA	Pass	287	222	98.28	93.66	4	0	0	0	34	0	0	0	62	0	0	95.15	4512306	9876	219964	285	34
20X	Mut_70	SPAdes	Pass	338	300	99.82	98.91	0	0	0	0	46	0	0	35	3	0	0	99.5	4718905	10478	13365	314	40
40X	Mut_70	SKESA	Pass	300	288	99.87	97.9	1	0	0	0	72	0	0	4	7	0	0	98.79	4685035	10312	47235	297	39
40X	Mut_70	SPAdes	Pass	325	301	99.84	98.95	0	0	0	0	45	0	0	20	4	0	0	99.51	4719356	10391	12914	308	39
60X	Mut_70	SKESA	Pass	297	295	99.91	98.38	0	0	0	0	39	0	0	0	2	0	0	99.19	4704346	10360	27924	297	39
60X	Mut_70	SPAdes	Pass	325	300	99.84	98.95	0	0	0	0	46	0	0	23	2	0	0	99.51	4719328	10422	12942	306	40
80X	Mut_70	SKESA	Pass	297	296	99.9	98.42	0	0	0	0	39	0	0	0	1	0	0	99.23	4706270	10360	26000	297	39
80X	Mut_70	SPAdes	Pass	330	300	99.84	98.95	0	0	0	0	46	0	0	28	2	0	0	99.51	4719328	10422	12942	306	40
100X	Mut_71	SKESA	Pass	294	289	99.91	98.48	0	0	0	0	39	0	0	2	3	0	0	99.26	4707552	10259	24718	292	39
100X	Mut_71	SPAdes	Pass	334	295	99.84	98.93	1	0	0	0	46	0	0	34	4	0	0	99.51	4719334	10290	12936	303	40
20X	Mut_71	SKESA	Pass	293	212	98.28	93.72	12	0	0	0	34	0	0	2	68	0	0	95.22	4515600	9997	216670	288	34
20X	Mut_71	SPAdes	Pass	337	297	99.84	98.93	1	0	0	0	46	0	0	36	3	0	0	99.5	4719044	10326	13226	303	40
40X	Mut_71	SKESA	Pass	299	286	99.86	97.9	0	0	0	0	71	0	0	6	7	0	0	98.8	4685471	10233	46799	294	38
40X	Mut_71	SPAdes	Pass	317	298	99.83	98.93	1	0	0	0	46	0	0	15	3	0	0	99.51	4719462	10290	12808	302	40
60X	Mut_71	SKESA	Pass	293	289	99.89	98.37	0	0	0	0	38	0	0	2	2	0	0	99.21	4705035	10197	27235	291	38
60X	Mut_71	SPAdes	Pass	330	296	99.84	98.93	1	0	0	0	46	0	0	32	1	0	0	99.51	4719484	10321	12786	307	40
80X	Mut_71	SKESA	Pass	294	289	99.91	98.44	0	0	0	0	39	0	0	2	3	0	0	99.24	4706565	10259	25705	292	39
80X	Mut_71	SPAdes	Pass	336	295	99.84	98.93	1	0	0	0	46	0	0	36	4	0	0	99.51	4719332	10290	12938	305	40
100X	Mut_72	SKESA	Pass	298	295	99.91	98.46	0	0	0	0	37	0	0	0	3	0	0	99.25	4707104	10314	25166	297	37
100X	Mut_72	SPAdes	Pass	318	301	99.81	98.93	0	0	0	0	43	0	0	13	4	0	0	99.51	4719440	10332	12830	305	37
20X	Mut_72	SKESA	Pass	291	222	98.11	93.48	4	0	0	0	35	0	0	0	67	0	0	95.12	4510860	10028	221410	286	37
20X	Mut_72	SPAdes	Pass	331	301	99.85	98.93	1	0	0	0	43	0	0	22	7	0	0	99.5	4719051	10339	13219	307	37
40X	Mut_72	SKESA	Pass	302	290	99.86	97.89	0	0	0	0	70	0	0	4	8	0	0	98.78	4684736	10314	47534	298	37
40X	Mut_72	SPAdes	Pass	322	301	99.84	98.94	0	0	0	0	43	0	0	13	8	0	0	99.51	4719372	10338	12898	308	37
60X	Mut_72	SKESA	Pass	298	295	99.89	98.37	0	0	0	0	37	0	0	0	3	0	0	99.2	4704591	10314	27679	297	37
60X	Mut_72	SPAdes	Pass	334	299	99.84	98.93	0	0	0	0	43	0	0	29	6	0	0	99.51	4719376	10332	12894	310	37
80X	Mut_72	SKESA	Pass	298	295	99.89	98.41	0	0	0	0	37	0	0	0	3	0	0	99.23	4706253	10314	26017	297	37
80X	Mut_72	SPAdes	Pass	319	301	99.83	98.93	0	0	0	0	43	0	0	13	5	0	0	99.51	4719378	10332	12892	306	37
100X	Mut_73	SKESA	Pass	295	293	99.89	98.45	0	0	0	0	40	0	0	0	2	0	0	99.25	4706959	10336	25311	295	40
100X	Mut_73	SPAdes	Pass	330	298	99.83	98.93	0	0	0	0	46	0	0	26	6	0	0	99.51	4719361	10367	12909	308	40
20X	Mut_73	SKESA	Pass	290	215	98.15	93.51	9	0	0	0	38	0	0	0	68	0	0	95.11	4510658	10146	221612	289	40
20X	Mut_73	SPAdes	Pass	331	303	99.83	98.92	0	0	0	0	46	0	0	24	4	0	0	99.5	4719125	10332	13145	312	40
40X	Mut_73	SKESA	Pass	295	283	99.85	97.88	0	0	0	0	40	0	0	0	12	0	0	98.79	4685240	10332	47030	295	40
40X	Mut_73	SPAdes	Pass	331	299	99.85	98.93	0	0	0	0	46	0	0	28	4	0	0	99.51	4719383	10336	12887	307	40
60X	Mut_73	SKESA	Pass	295	292	99.89	98.35	0	0	0	0	40	0	0	0	3	0	0	99.19	4704148	10336	28122	295	40
60X	Mut_73	SPAdes	Pass	325	298	99.83	98.93	0	0	0	0	46	0	0	24	3	0	0	99.51	4719361	10367	12909	307	40
80X	Mut_73	SKESA	Pass	295	292	99.89	98.41	0	0	0	0	40	0	0	0	3	0	0	99.23	4705975	10336	26295	295	40
80X	Mut_73	SPAdes	Pass	331	299	99.84	98.93	0	0	0	0	46	0	0	28	4	0	0	99.51	4719355	10367	12915	307	40
100X	Mut_74	SKESA	Pass	296	293	99.9	98.47	0	0	0	0	38	0	0	0	3	0	0	99.26	4707618	10304	24652	296	38
100X	Mut_74	SPAdes	Pass	329	298	99.81	98.91	0	0	0	0	46	0	0	24	7	0	0	99.51	4719339	10390	12931	310	40
20X	Mut_74	SKESA	Pass	292	223	98.03	93.41	9	0	0	0	35	0	0	0	61	0	0	95.14	4511794	9999	220476	288	36
20X	Mut_74	SPAdes	Pass	327	297	99.8	98.91	0	0	0	0	46	0	0	24	6	0	0	99.5	4719135	10420	13135	306	40
40X	Mut_74	SKESA	Pass	295	285	99.86	97.9	0	0	0	0	38	0	0	0	10	0	0	98.8	4685782	10266	46488	295	38
40X	Mut_74	SPAdes	Pass	328	299	99.83	98.93	0	0	0	0	46	0	0	24	5	0	0	99.51	4719275	10421	12995	309	40
60X	Mut_74	SKESA	Pass	295	290	99.87	98.36	0	0	0	0	38	0	0	0	5	0	0	99.21	4704918	10273	27352	295	38
60X	Mut_74	SPAdes	Pass	330	298	99.84	98.93	0	0	0	0	46	0	0	26	6	0	0	99.51	4719331	10390	12939	312	40
80X	Mut_74	SKESA	Pass	296	292	99.89	98.43	0	0	0	0	38	0	0	0	4	0	0	99.24	4706737	10304	25533	296	38
80X	Mut_74	SPAdes	Pass	328	298	99.83	98.93	0	0	0	0	46	0	0	24	6	0	0	99.51	4719339	10390	12931	309	40
100X	Mut_75	SKESA	Pass	293	288	99.89	98.45	0	0	0	0	40	0	0	0	5	0	0	99.26	4707370	10255	24900	292	40
100X	Mut_75	SPAdes	Pass	329	294	99.84	98.93	0	0	0	0	46	0	0	30	5	0	0	99.51	4719444	10331	12826	307	40
20X	Mut_75	SKESA	Pass	282	220	98.06	93.44	2	0	0	0	38	0	0	0	60	0	0	95.12	4510817	9835	221453	280	38
20X	Mut_75	SPAdes	Pass	331	293	99.85	98.91	0	0	0	0	44	0	0	30	8	0	0	99.5	4718666	10340	13604	310	40
40X	Mut_75	SKESA	Pass	292	275	99.86	97.89	0	0	0	0	40	0	0	0	17	0	0	98.78	4684838	10220	47432	291	40
40X	Mut_75	SPAdes	Pass	321	294	99.84	98.93	0	0	0	0	46	0	0	23	4	0	0	99.51	4719436	10331	12834	306	40
60X	Mut_75	SKESA	Pass	293	288	99.88	98.36	0	0	0	0	40	0	0	0	5	0	0	99.2	4704686	10255	27584	292	40
60X	Mut_75	SPAdes	Pass	327	295	99.84	98.93	0	0	0	0	46	0	0	29	3	0	0	99.51	4719413	10362	12857	308	40
80X	Mut_75	SKESA	Pass	293	288	99.89	98.42	0	0	0	0	40	0	0	0	5	0	0	99.24	4706536	10255	25734	292	40
80X	Mut_75	SPAdes	Pass	329	294	99.84	98.93	0	0	0	0	46	0	0	30	5	0	0	99.51	4719444	10331	12826	307	40
100X	Mut_76	SKESA	Pass	291	291	99.9	98.46	0	0	0	0	40	0	0	0	0	0	0	99.26	4707485	10244	24785	291	40
100X	Mut_76	SPAdes	Pass	325	293	99.85	98.93	2	0	0	0	46	0	0	28	2	0	0	99.51	4719387	10337	12883	308	40
20X	Mut_76	SKESA	Pass	288	226	98.24	93.61	5	0	0	0	38	0	0	0	59	0	0	95.14	4511922	10029	220348	283	40
20X	Mut_76	SPAdes	Pass	354	297	99.83	98.93	0	0	0	0	46	0	0	55	2	0	0	99.5	4718993	10326	13277	315	40
40X	Mut_76	SKESA	Pass	291	287	99.87	97.9	0	0	0	0	40	0	0	0	4	0	0	98.78	4684692	10213	47578	291	40
40X	Mut_76	SPAdes	Pass	323	295	99.83	98.93	0	0	0	0	46	0	0	25	3	0	0	99.51	4719443	10306	12827	304	40
60X	Mut_76	SKESA	Pass	291	291	99.88	98.36	0	0	0	0	40	0	0	0	0	0	0	99.2	4704597	10244	27673	291	40
60X	Mut_76	SPAdes	Pass	320	296	99.83	98.93	0	0	0	0	46	0	0	20	4	0	0	99.51	4719446	10306	12824	307	40
80X	Mut_76	SKESA	Pass	291	291	99.9	98.42	0	0	0	0	40	0	0	0	0	0	0	99.23	4706053	10244	26217	291	40
80X	Mut_76	SPAdes	Pass	326	295	99.83	98.93	0	0	0	0	46	0	0	29	2	0	0	99.51	4719449	10306	12821	307	40
100X	Mut_77	SKESA	Pass	296	291	99.89	98.46	0	0	0	0	38	0	0	0	5	0	0	99.26	4707388	10298	24882	295	37
100X	Mut_77	SPAdes	Pass	328	292	99.88	98.95	0	0	0	0	44	0	0	30	6	0	0	99.51	4719374	10329	12896	309	37
20X	Mut_77	SKESA	Pass	285	223	98.28	93.66	4	0	0	0	35	0	0	0	59	0	0	95.19	4514170	9783	218100	280	34
20X	Mut_77	SPAdes	Pass	331	299	99.86	98.94	1	0	0	0	44	0	0	26	6	0	0	99.51	4719381	10434	12889	309	38
40X	Mut_77	SKESA	Pass	297	283	99.85	97.9	0	0	0	0	71	0	0	4	10	0	0	98.81	4686147	10205	46123	293	37
40X	Mut_77	SPAdes	Pass	331	299	99.85	98.95	1	0	0	0	44	0	0	27	5	0	0	99.52	4719663	10359	12607	312	38
60X	Mut_77	SKESA	Pass	294	289	99.88	98.35	0	0	0	0	38	0	0	0	5	0	0	99.19	4704301	10236	27969	293	37
60X	Mut_77	SPAdes	Pass	333	298	99.85	98.95	0	0	0	0	44	0	0	30	5	0	0	99.51	4719609	10391	12661	314	37
80X	Mut_77	SKESA	Pass	296	290	99.89	98.41	0	0	0	0	38	0	0	0	6	0	0	99.24	4706317	10298	25953	295	37
80X	Mut_77	SPAdes	Pass	331	294	99.88	98.95	0	0	0	0	44	0	0	32	5	0	0	99.51	4719364	10329	12906	312	37
100X	Mut_78	SKESA	Pass	296	294	99.89	98.46	0	0	0	0	39	0	0	2	0	0	0	99.26	4707590	10290	24680	292	39
100X	Mut_78	SPAdes	Pass	328	299	99.85	98.93	0	0	0	0	46	0	0	26	3	0	0	99.51	4719373	10382	12897	304	40
20X	Mut_78	SKESA	Pass	289	214	98.29	93.68	3	0	0	0	38	0	0	2	70	0	0	95.16	4512840	9999	219430	284	38
20X	Mut_78	SPAdes	Pass	321	301	99.83	98.95	0	0	0	0	45	0	0	17	3	0	0	99.5	4718931	10383	13339	301	39
40X	Mut_78	SKESA	Pass	297	290	99.86	97.94	0	0	0	0	39	0	0	2	5	0	0	98.83	4687133	10321	45137	293	39
40X	Mut_78	SPAdes	Pass	334	299	99.85	98.93	0	0	0	0	46	0	0	31	4	0	0	99.51	4719339	10413	12931	308	40
60X	Mut_78	SKESA	Pass	296	294	99.9	98.39	0	0	0	0	39	0	0	2	0	0	0	99.22	4705371	10290	26899	292	39
60X	Mut_78	SPAdes	Pass	319	299	99.82	98.93	0	0	0	0	46	0	0	17	3	0	0	99.51	4719435	10382	12835	300	40
80X	Mut_78	SKESA	Pass	296	294	99.9	98.44	0	0	0	0	39	0	0	2	0	0	0	99.25	4706798	10290	25472	292	39
80X	Mut_78	SPAdes	Pass	329	299	99.85	98.93	0	0	0	0	46	0	0	26	4	0	0	99.51	4719341	10413	12929	305	40
100X	Mut_79	SKESA	Pass	298	296	99.91	98.48	0	0	0	0	40	0	0	0	2	0	0	99.26	4707572	10418	24698	298	40
100X	Mut_79	SPAdes	Pass	330	302	99.85	98.93	0	0	0	0	46	0	0	22	6	0	0	99.51	4719274	10449	12996	311	40
20X	Mut_79	SKESA	Pass	294	236	98.33	93.85	2	0	0	0	39	0	0	0	57	0	0	95.31	4520213	10128	212057	288	40
20X	Mut_79	SPAdes	Pass	347	302	99.81	98.91	0	0	0	0	46	0	0	39	6	0	0	99.5	4718901	10472	13369	313	40
40X	Mut_79	SKESA	Pass	295	293	99.86	97.92	0	0	0	0	40	0	0	0	2	0	0	98.82	4686648	10325	45622	295	40
40X	Mut_79	SPAdes	Pass	325	301	99.84	98.93	0	0	0	0	46	0	0	19	5	0	0	99.51	4719273	10449	12997	308	40
60X	Mut_79	SKESA	Pass	298	296	99.91	98.39	0	0	0	0	40	0	0	0	2	0	0	99.19	4704432	10418	27838	298	40
60X	Mut_79	SPAdes	Pass	332	302	99.85	98.93	0	0	0	0	46	0	0	26	4	0	0	99.51	4719274	10449	12996	308	40
80X	Mut_79	SKESA	Pass	298	296	99.9	98.43	0	0	0	0	40	0	0	0	2	0	0	99.24	4706697	10418	25573	298	40
80X	Mut_79	SPAdes	Pass	326	302	99.85	98.93	0	0	0	0	46	0	0	19	5	0	0	99.51	4719274	10449	12996	307	40
100X	Mut_8	SKESA	Pass	297	293	99.88	98.49	0	0	0	0	38	0	0	0	4	0	0	99.29	4708920	10351	23350	297	38
100X	Mut_8	SPAdes	Pass	318	300	99.83	98.93	0	0	0	0	45	0	0	13	5	0	0	99.51	4719444	10351	12826	305	39
20X	Mut_8	SKESA	Pass	321	231	98.1	93.55	6	0	33	0	36	0	0	0	51	0	0	95.23	4516210	9961	216060	287	36
20X	Mut_8	SPAdes	Pass	337	299	99.84	98.92	0	0	0	0	45	0	0	31	7	0	0	99.5	4719010	10391	13260	308	39
40X	Mut_8	SKESA	Pass	294	285	99.87	97.93	1	0	0	0	38	0	0	0	8	0	0	98.83	4686807	10231	45463	294	38
40X	Mut_8	SPAdes	Pass	323	302	99.84	98.93	0	0	0	0	46	0	0	17	4	0	0	99.51	4719413	10381	12857	310	40
60X	Mut_8	SKESA	Pass	295	291	99.88	98.37	0	0	0	0	38	0	0	0	4	0	0	99.22	4705376	10289	26894	295	38
60X	Mut_8	SPAdes	Pass	322	300	99.84	98.93	0	0	0	0	46	0	0	19	3	0	0	99.51	4719431	10381	12839	305	40
80X	Mut_8	SKESA	Pass	297	293	99.87	98.42	0	0	0	0	38	0	0	0	4	0	0	99.26	4707417	10351	24853	297	38
80X	Mut_8	SPAdes	Pass	316	300	99.81	98.93	0	0	0	0	45	0	0	13	3	0	0	99.51	4719532	10351	12738	303	39
100X	Mut_80	SKESA	Pass	296	293	99.9	98.46	0	0	0	0	39	0	0	2	1	0	0	99.26	4707338	10325	24932	294	39
100X	Mut_80	SPAdes	Pass	328	298	99.87	98.95	0	0	0	0	45	0	0	26	4	0	0	99.51	4719350	10325	12920	307	39
20X	Mut_80	SKESA	Pass	296	229	98.2	93.64	7	0	0	0	35	0	0	2	59	0	0	95.21	4515083	10148	217187	290	36
20X	Mut_80	SPAdes	Pass	337	298	99.81	98.92	0	0	0	0	45	0	0	34	5	0	0	99.5	4719118	10379	13152	311	39
40X	Mut_80	SKESA	Pass	301	289	99.86	97.89	0	0	0	0	71	0	0	6	6	0	0	98.78	4684927	10328	47343	296	38
40X	Mut_80	SPAdes	Pass	329	298	99.87	98.95	1	0	0	0	45	0	0	29	1	0	0	99.51	4719341	10328	12929	309	39
60X	Mut_80	SKESA	Pass	296	292	99.88	98.36	0	0	0	0	39	0	0	2	2	0	0	99.2	4704675	10325	27595	294	39
60X	Mut_80	SPAdes	Pass	325	297	99.87	98.94	1	0	0	0	45	0	0	24	3	0	0	99.51	4719350	10325	12920	304	39
80X	Mut_80	SKESA	Pass	296	293	99.89	98.43	0	0	0	0	39	0	0	2	1	0	0	99.24	4706769	10325	25501	294	39
80X	Mut_80	SPAdes	Pass	327	297	99.87	98.95	0	0	0	0	45	0	0	26	4	0	0	99.51	4719350	10325	12920	306	39
100X	Mut_81	SKESA	Pass	293	291	99.89	98.46	0	0	0	0	40	0	0	0	2	0	0	99.26	4707647	10277	24623	293	40
100X	Mut_81	SPAdes	Pass	315	294	99.81	98.94	0	0	0	0	46	0	0	16	5	0	0	99.52	4719717	10308	12553	302	40
20X	Mut_81	SKESA	Pass	283	207	98.19	93.51	2	0	0	0	39	0	0	0	74	0	0	95.08	4508981	9868	223289	280	39
20X	Mut_81	SPAdes	Pass	323	295	99.84	98.95	0	0	0	0	46	0	0	23	5	0	0	99.52	4719609	10308	12661	304	40
40X	Mut_81	SKESA	Pass	293	284	99.87	97.9	0	0	0	0	40	0	0	0	9	0	0	98.79	4685241	10264	47029	292	40
40X	Mut_81	SPAdes	Pass	327	295	99.82	98.95	0	0	0	0	46	0	0	26	6	0	0	99.52	4719667	10339	12603	307	40
60X	Mut_81	SKESA	Pass	292	290	99.87	98.36	1	0	0	0	40	0	0	0	1	0	0	99.21	4704945	10246	27325	292	40
60X	Mut_81	SPAdes	Pass	321	296	99.82	98.96	0	0	0	0	46	0	0	20	5	0	0	99.52	4719816	10339	12454	304	40
80X	Mut_81	SKESA	Pass	292	291	99.89	98.42	0	0	0	0	40	0	0	0	1	0	0	99.24	4706559	10246	25711	292	40
80X	Mut_81	SPAdes	Pass	312	294	99.83	98.95	0	0	0	0	46	0	0	13	5	0	0	99.52	4719786	10339	12484	299	40
100X	Mut_82	SKESA	Pass	294	289	99.91	98.46	0	0	0	0	40	0	0	4	1	0	0	99.25	4706858	10260	25412	290	40
100X	Mut_82	SPAdes	Pass	325	296	99.84	98.93	0	0	0	0	46	0	0	26	3	0	0	99.51	4719377	10322	12893	303	40
20X	Mut_82	SKESA	Pass	289	209	98.21	93.6	7	0	0	0	40	0	0	2	71	0	0	95.16	4512823	10016	219447	281	40
20X	Mut_82	SPAdes	Pass	331	296	99.82	98.92	1	0	0	0	46	0	0	31	3	0	0	99.51	4719152	10299	13118	302	40
40X	Mut_82	SKESA	Pass	294	285	99.87	97.9	0	0	0	0	40	0	0	4	5	0	0	98.79	4685291	10250	46979	290	40
40X	Mut_82	SPAdes	Pass	314	295	99.84	98.93	0	0	0	0	46	0	0	17	2	0	0	99.51	4719403	10291	12867	297	40
60X	Mut_82	SKESA	Pass	294	287	99.89	98.36	0	0	0	0	40	0	0	4	3	0	0	99.19	4704302	10250	27968	290	40
60X	Mut_82	SPAdes	Pass	317	296	99.84	98.93	0	0	0	0	46	0	0	19	2	0	0	99.51	4719341	10325	12929	298	40
80X	Mut_82	SKESA	Pass	294	287	99.91	98.43	0	0	0	0	40	0	0	4	3	0	0	99.23	4705914	10250	26356	290	40
80X	Mut_82	SPAdes	Pass	323	293	99.81	98.93	0	0	0	0	46	0	0	27	3	0	0	99.51	4719439	10322	12831	297	40
100X	Mut_83	SKESA	Pass	296	290	99.88	98.45	0	0	0	0	39	0	0	2	4	0	0	99.26	4707587	10306	24683	294	39
100X	Mut_83	SPAdes	Pass	328	294	99.82	98.93	2	0	0	0	39	0	0	30	3	0	0	99.51	4719342	10377	12928	311	40
20X	Mut_83	SKESA	Pass	290	226	98.36	93.76	4	0	0	0	39	0	0	2	58	0	0	95.2	4514715	10112	217555	287	39
20X	Mut_83	SPAdes	Pass	325	294	99.79	98.91	2	0	0	0	39	0	0	27	3	0	0	99.51	4719402	10362	12868	307	40
40X	Mut_83	SKESA	Pass	298	283	99.86	97.9	0	0	0	0	72	0	0	6	9	0	0	98.79	4685305	10240	46965	293	38
40X	Mut_83	SPAdes	Pass	322	299	99.82	98.93	1	0	0	0	39	0	0	19	4	0	0	99.51	4719469	10386	12801	309	40
60X	Mut_83	SKESA	Pass	295	289	99.88	98.36	0	0	0	0	39	0	0	2	4	0	0	99.2	4704690	10275	27580	293	39
60X	Mut_83	SPAdes	Pass	325	296	99.82	98.94	1	0	0	0	39	0	0	25	4	0	0	99.51	4719373	10377	12897	308	40
80X	Mut_83	SKESA	Pass	296	290	99.88	98.41	0	0	0	0	39	0	0	2	4	0	0	99.24	4706369	10306	25901	294	39
80X	Mut_83	SPAdes	Pass	329	295	99.82	98.94	1	0	0	0	39	0	0	30	4	0	0	99.51	4719373	10377	12897	313	40
100X	Mut_84	SKESA	Pass	297	293	99.89	98.45	0	0	0	0	39	0	0	2	2	0	0	99.25	4707230	10347	25040	295	39
100X	Mut_84	SPAdes	Pass	342	301	99.85	98.94	0	0	0	0	46	0	0	37	4	0	0	99.51	4719238	10378	13032	318	40
20X	Mut_84	SKESA	Pass	293	219	98.23	93.61	6	0	0	0	38	0	0	2	67	0	0	95.16	4512827	10221	219443	291	39
20X	Mut_84	SPAdes	Pass	337	298	99.82	98.91	0	0	0	0	46	0	0	32	7	0	0	99.5	4718895	10378	13375	314	40
40X	Mut_84	SKESA	Pass	297	284	99.84	97.92	1	0	0	0	38	0	0	2	10	0	0	98.83	4687199	10317	45071	295	38
40X	Mut_84	SPAdes	Pass	327	298	99.84	98.94	0	0	0	0	45	0	0	26	3	0	0	99.51	4719388	10378	12882	304	39
60X	Mut_84	SKESA	Pass	296	291	99.88	98.36	0	0	0	0	39	0	0	2	3	0	0	99.2	4704670	10316	27600	294	39
60X	Mut_84	SPAdes	Pass	328	298	99.84	98.94	0	0	0	0	46	0	0	27	3	0	0	99.51	4719391	10378	12879	304	40
80X	Mut_84	SKESA	Pass	296	292	99.89	98.42	0	0	0	0	39	0	0	2	2	0	0	99.24	4706313	10316	25957	294	39
80X	Mut_84	SPAdes	Pass	325	298	99.84	98.93	0	0	0	0	46	0	0	24	3	0	0	99.51	4719389	10378	12881	304	40
100X	Mut_85	SKESA	Pass	298	295	99.89	98.46	0	0	0	0	38	0	0	2	1	0	0	99.26	4707596	10376	24674	296	38
100X	Mut_85	SPAdes	Pass	330	294	99.83	98.93	0	0	0	0	45	0	0	34	2	0	0	99.51	4719371	10407	12899	309	39
20X	Mut_85	SKESA	Pass	294	224	98.26	93.63	5	0	0	0	37	0	0	0	65	0	0	95.16	4512572	10067	219698	289	36
20X	Mut_85	SPAdes	Pass	322	300	99.82	98.91	0	0	0	0	45	0	0	17	5	0	0	99.5	4718992	10430	13278	304	39
40X	Mut_85	SKESA	Pass	297	287	99.84	97.88	1	0	0	0	38	0	0	2	7	0	0	98.8	4685468	10315	46802	295	38
40X	Mut_85	SPAdes	Pass	332	295	99.82	98.93	0	0	0	0	45	0	0	35	2	0	0	99.51	4719433	10407	12837	309	39
60X	Mut_85	SKESA	Pass	298	294	99.87	98.35	0	0	0	0	38	0	0	2	2	0	0	99.2	4704645	10376	27625	296	38
60X	Mut_85	SPAdes	Pass	333	295	99.84	98.93	0	0	0	0	45	0	0	31	7	0	0	99.51	4719324	10407	12946	312	39
80X	Mut_85	SKESA	Pass	298	294	99.88	98.41	0	0	0	0	38	0	0	2	2	0	0	99.24	4706429	10376	25841	296	38
80X	Mut_85	SPAdes	Pass	328	294	99.83	98.93	0	0	0	0	45	0	0	28	6	0	0	99.51	4719342	10415	12928	303	39
100X	Mut_86	SKESA	Pass	290	290	99.88	98.44	0	0	0	0	39	0	0	0	0	0	0	99.26	4707283	10152	24987	290	39
100X	Mut_86	SPAdes	Pass	317	295	99.86	98.93	2	0	0	0	45	0	0	13	7	0	0	99.51	4719424	10214	12846	304	39
20X	Mut_86	SKESA	Pass	284	230	98.28	93.6	3	0	0	0	37	0	0	0	52	0	0	95.12	4510835	9871	221435	281	38
20X	Mut_86	SPAdes	Pass	345	295	99.87	98.92	2	0	0	0	45	0	0	44	4	0	0	99.5	4718660	10219	13610	315	39
40X	Mut_86	SKESA	Pass	293	281	99.84	97.85	0	0	0	0	72	0	0	4	8	0	0	98.77	4684223	10121	48047	290	39
40X	Mut_86	SPAdes	Pass	321	293	99.86	98.93	1	0	0	0	45	0	0	22	5	0	0	99.52	4719486	10183	12784	299	39
60X	Mut_86	SKESA	Pass	289	289	99.88	98.35	0	0	0	0	39	0	0	0	0	0	0	99.2	4704466	10121	27804	289	39
60X	Mut_86	SPAdes	Pass	331	295	99.86	98.93	1	0	0	0	45	0	0	28	7	0	0	99.51	4719444	10214	12826	309	39
80X	Mut_86	SKESA	Pass	289	289	99.88	98.4	0	0	0	0	39	0	0	0	0	0	0	99.23	4705955	10121	26315	289	39
80X	Mut_86	SPAdes	Pass	317	293	99.86	98.93	2	0	0	0	45	0	0	17	5	0	0	99.51	4719424	10214	12846	304	39
100X	Mut_87	SKESA	Pass	294	292	99.9	98.45	0	0	0	0	40	0	0	0	2	0	0	99.24	4706571	10311	25699	294	40
100X	Mut_87	SPAdes	Pass	326	295	99.83	98.93	0	0	0	0	46	0	0	28	3	0	0	99.51	4719335	10404	12935	308	40
20X	Mut_87	SKESA	Pass	293	230	98.38	93.79	6	0	0	0	37	0	0	0	57	0	0	95.2	4514543	10115	217727	289	37
20X	Mut_87	SPAdes	Pass	330	296	99.8	98.92	0	0	0	0	46	0	0	33	1	0	0	99.5	4719040	10416	13230	308	40
40X	Mut_87	SKESA	Pass	292	281	99.85	97.88	0	0	0	0	40	0	0	0	11	0	0	98.79	4685079	10234	47191	291	40
40X	Mut_87	SPAdes	Pass	324	296	99.83	98.93	0	0	0	0	46	0	0	22	6	0	0	99.51	4719309	10404	12961	309	40
60X	Mut_87	SKESA	Pass	294	291	99.88	98.34	0	0	0	0	40	0	0	0	3	0	0	99.18	4703920	10311	28350	294	40
60X	Mut_87	SPAdes	Pass	332	295	99.83	98.93	0	0	0	0	46	0	0	31	6	0	0	99.51	4719311	10404	12959	308	40
80X	Mut_87	SKESA	Pass	294	291	99.9	98.41	0	0	0	0	40	0	0	0	3	0	0	99.22	4705588	10311	26682	294	40
80X	Mut_87	SPAdes	Pass	326	295	99.83	98.93	0	0	0	0	46	0	0	28	3	0	0	99.51	4719365	10373	12905	311	40
100X	Mut_88	SKESA	Pass	295	294	99.89	98.46	0	0	0	0	39	0	0	0	1	0	0	99.26	4707546	10303	24724	295	39
100X	Mut_88	SPAdes	Pass	329	297	99.83	98.93	0	0	0	0	45	0	0	30	2	0	0	99.51	4719431	10272	12839	307	39
20X	Mut_88	SKESA	Pass	287	224	98.27	93.66	5	0	0	0	38	0	0	0	59	0	0	95.15	4512448	9971	219822	284	39
20X	Mut_88	SPAdes	Pass	336	297	99.83	98.93	0	0	0	0	45	0	0	37	2	0	0	99.51	4719243	10303	13027	310	39
40X	Mut_88	SKESA	Pass	293	291	99.86	97.88	0	0	0	0	39	0	0	0	2	0	0	98.78	4684486	10226	47784	292	39
40X	Mut_88	SPAdes	Pass	332	298	99.84	98.93	0	0	0	0	45	0	0	30	4	0	0	99.51	4719457	10272	12813	308	39
60X	Mut_88	SKESA	Pass	294	293	99.87	98.36	0	0	0	0	39	0	0	0	1	0	0	99.2	4704768	10272	27502	294	39
60X	Mut_88	SPAdes	Pass	329	297	99.83	98.93	0	0	0	0	45	0	0	29	3	0	0	99.51	4719462	10272	12808	309	39
80X	Mut_88	SKESA	Pass	294	294	99.89	98.41	0	0	0	0	39	0	0	0	0	0	0	99.24	4706351	10272	25919	294	39
80X	Mut_88	SPAdes	Pass	321	297	99.83	98.93	0	0	0	0	45	0	0	22	2	0	0	99.51	4719460	10272	12810	304	39
100X	Mut_89	SKESA	Pass	296	295	99.91	98.48	0	0	0	0	40	0	0	0	1	0	0	99.26	4707428	10361	24842	296	40
100X	Mut_89	SPAdes	Pass	323	298	99.86	98.94	1	0	0	0	46	0	0	20	4	0	0	99.51	4719469	10392	12801	306	40
20X	Mut_89	SKESA	Pass	297	221	98.28	93.63	3	0	0	0	38	0	0	0	73	0	0	95.1	4510203	10154	222067	290	38
20X	Mut_89	SPAdes	Pass	323	295	99.83	98.92	1	0	0	0	44	0	0	22	5	0	0	99.5	4719199	10424	13071	311	40
40X	Mut_89	SKESA	Pass	300	287	99.87	97.91	0	0	0	0	73	0	0	4	9	0	0	98.79	4685334	10346	46936	296	40
40X	Mut_89	SPAdes	Pass	326	296	99.86	98.94	1	0	0	0	46	0	0	25	4	0	0	99.51	4719464	10392	12806	309	40
60X	Mut_89	SKESA	Pass	296	294	99.91	98.38	0	0	0	0	40	0	0	0	2	0	0	99.2	4704502	10361	27768	296	40
60X	Mut_89	SPAdes	Pass	323	298	99.86	98.94	1	0	0	0	46	0	0	20	4	0	0	99.51	4719464	10392	12806	306	40
80X	Mut_89	SKESA	Pass	296	294	99.91	98.43	0	0	0	0	40	0	0	0	2	0	0	99.23	4706324	10361	25946	296	40
80X	Mut_89	SPAdes	Pass	321	297	99.86	98.94	1	0	0	0	46	0	0	19	4	0	0	99.51	4719462	10392	12808	308	40
100X	Mut_9	SKESA	Pass	294	293	99.91	98.47	0	0	0	0	38	0	0	0	1	0	0	99.26	4707341	10245	24929	294	38
100X	Mut_9	SPAdes	Pass	328	297	99.82	98.94	1	0	0	0	44	0	0	27	3	0	0	99.51	4719484	10356	12786	309	38
20X	Mut_9	SKESA	Pass	287	233	98.32	93.73	4	0	0	0	37	0	0	0	50	0	0	95.21	4515229	9907	217041	283	37
20X	Mut_9	SPAdes	Pass	331	297	99.85	98.93	1	0	0	0	47	0	0	28	5	0	0	99.51	4719190	10368	13080	312	38
40X	Mut_9	SKESA	Pass	294	287	99.86	97.89	1	0	0	0	38	0	0	0	6	0	0	98.77	4684204	10232	48066	293	38
40X	Mut_9	SPAdes	Pass	330	296	99.83	98.93	1	0	0	0	44	0	0	28	5	0	0	99.51	4719484	10356	12786	311	38
60X	Mut_9	SKESA	Pass	294	293	99.9	98.38	0	0	0	0	38	0	0	0	1	0	0	99.21	4704849	10245	27421	294	38
60X	Mut_9	SPAdes	Pass	325	296	99.83	98.93	1	0	0	0	44	0	0	23	5	0	0	99.51	4719484	10356	12786	308	38
80X	Mut_9	SKESA	Pass	294	293	99.9	98.44	0	0	0	0	38	0	0	0	1	0	0	99.25	4706820	10245	25450	294	38
80X	Mut_9	SPAdes	Pass	331	297	99.83	98.93	1	0	0	0	44	0	0	28	5	0	0	99.51	4719484	10356	12786	312	38
100X	Mut_90	SKESA	Pass	298	298	99.91	98.49	0	0	0	0	40	0	0	0	0	0	0	99.27	4707851	10433	24419	296	40
100X	Mut_90	SPAdes	Pass	331	302	99.83	98.93	0	0	0	0	46	0	0	25	4	0	0	99.51	4719287	10480	12983	306	40
20X	Mut_90	SKESA	Pass	294	220	98.17	93.55	9	0	0	0	38	0	0	0	65	0	0	95.15	4512481	10145	219789	291	36
20X	Mut_90	SPAdes	Pass	332	303	99.81	98.94	1	0	0	0	46	0	0	22	6	0	0	99.5	4719000	10528	13270	309	40
40X	Mut_90	SKESA	Pass	299	295	99.87	97.92	1	0	0	0	40	0	0	0	3	0	0	98.81	4686329	10415	45941	296	40
40X	Mut_90	SPAdes	Pass	334	302	99.83	98.93	0	0	0	0	46	0	0	27	5	0	0	99.5	4719247	10495	13023	313	40
60X	Mut_90	SKESA	Pass	298	298	99.88	98.36	0	0	0	0	40	0	0	0	0	0	0	99.2	4704681	10433	27589	296	40
60X	Mut_90	SPAdes	Pass	327	304	99.83	98.93	0	0	0	0	46	0	0	17	6	0	0	99.5	4719265	10480	13005	311	40
80X	Mut_90	SKESA	Pass	298	298	99.9	98.43	0	0	0	0	40	0	0	0	0	0	0	99.24	4706754	10433	25516	296	40
80X	Mut_90	SPAdes	Pass	322	302	99.84	98.93	0	0	0	0	46	0	0	16	4	0	0	99.51	4719287	10480	12983	306	40
100X	Mut_91	SKESA	Pass	291	288	99.87	98.44	0	0	0	0	40	0	0	0	3	0	0	99.26	4707497	10204	24773	289	40
100X	Mut_91	SPAdes	Pass	317	292	99.84	98.93	1	0	0	0	46	0	0	17	7	0	0	99.51	4719480	10325	12790	302	40
20X	Mut_91	SKESA	Pass	283	226	98.17	93.63	5	0	0	0	39	0	0	0	52	0	0	95.27	4517603	9873	214667	279	38
20X	Mut_91	SPAdes	Pass	328	289	99.84	98.94	0	0	0	0	46	0	0	33	6	0	0	99.51	4719443	10320	12827	305	40
40X	Mut_91	SKESA	Pass	289	281	99.83	97.87	1	0	0	0	39	0	0	0	8	0	0	98.81	4685793	10139	46477	287	40
40X	Mut_91	SPAdes	Pass	317	294	99.83	98.93	2	0	0	0	46	0	0	15	6	0	0	99.51	4719442	10356	12828	300	40
60X	Mut_91	SKESA	Pass	290	287	99.87	98.35	0	0	0	0	40	0	0	0	3	0	0	99.2	4704625	10170	27645	288	40
60X	Mut_91	SPAdes	Pass	329	294	99.84	98.93	2	0	0	0	46	0	0	25	8	0	0	99.51	4719442	10356	12828	305	40
80X	Mut_91	SKESA	Pass	291	288	99.87	98.4	0	0	0	0	40	0	0	0	3	0	0	99.24	4706582	10201	25688	289	40
80X	Mut_91	SPAdes	Pass	329	294	99.84	98.93	2	0	0	0	46	0	0	26	7	0	0	99.51	4719449	10356	12821	305	40
100X	Mut_92	SKESA	Pass	298	294	99.89	98.46	0	0	0	0	39	0	0	2	2	0	0	99.26	4707337	10354	24933	294	39
100X	Mut_92	SPAdes	Pass	317	299	99.83	98.93	0	0	0	0	46	0	0	15	3	0	0	99.51	4719260	10385	13010	300	40
20X	Mut_92	SKESA	Pass	291	219	98.33	93.84	7	0	0	0	38	0	0	2	63	0	0	95.32	4520455	10003	211815	283	38
20X	Mut_92	SPAdes	Pass	319	300	99.78	98.9	0	0	0	0	46	0	0	15	4	0	0	99.5	4719045	10409	13225	301	40
40X	Mut_92	SKESA	Pass	298	281	99.85	97.89	0	0	0	0	39	0	0	2	15	0	0	98.8	4685540	10333	46730	293	39
40X	Mut_92	SPAdes	Pass	337	298	99.81	98.93	0	0	0	0	46	0	0	36	3	0	0	99.5	4719145	10385	13125	305	40
60X	Mut_92	SKESA	Pass	297	291	99.89	98.37	0	0	0	0	39	0	0	2	4	0	0	99.2	4704815	10323	27455	293	39
60X	Mut_92	SPAdes	Pass	326	300	99.84	98.93	0	0	0	0	46	0	0	22	4	0	0	99.51	4719333	10413	12937	305	40
80X	Mut_92	SKESA	Pass	298	293	99.88	98.42	0	0	0	0	39	0	0	2	3	0	0	99.24	4706582	10354	25688	294	39
80X	Mut_92	SPAdes	Pass	318	300	99.83	98.93	0	0	0	0	46	0	0	15	3	0	0	99.51	4719260	10385	13010	301	40
100X	Mut_93	SKESA	Pass	297	295	99.89	98.45	0	0	0	0	39	0	0	0	2	0	0	99.25	4707088	10361	25182	297	39
100X	Mut_93	SPAdes	Pass	329	299	99.83	98.94	0	0	0	0	45	0	0	25	5	0	0	99.51	4719339	10392	12931	314	39
20X	Mut_93	SKESA	Pass	291	224	98.28	93.77	4	0	0	0	38	0	0	0	63	0	0	95.29	4519166	10025	213104	287	36
20X	Mut_93	SPAdes	Pass	348	302	99.78	98.89	1	0	0	0	43	0	0	40	5	0	0	99.5	4718880	10392	13390	311	39
40X	Mut_93	SKESA	Pass	296	292	99.85	97.89	0	0	0	0	39	0	0	0	4	0	0	98.79	4685307	10330	46963	296	39
40X	Mut_93	SPAdes	Pass	328	299	99.81	98.94	0	0	0	0	45	0	0	25	4	0	0	99.51	4719383	10392	12887	310	39
60X	Mut_93	SKESA	Pass	297	295	99.88	98.36	0	0	0	0	39	0	0	0	2	0	0	99.2	4704726	10334	27544	296	39
60X	Mut_93	SPAdes	Pass	330	299	99.83	98.94	0	0	0	0	45	0	0	27	4	0	0	99.51	4719309	10392	12961	312	39
80X	Mut_93	SKESA	Pass	297	295	99.88	98.41	0	0	0	0	39	0	0	0	2	0	0	99.23	4706318	10361	25952	297	39
80X	Mut_93	SPAdes	Pass	332	300	99.84	98.93	0	0	0	0	45	0	0	25	7	0	0	99.51	4719339	10392	12931	317	39
100X	Mut_94	SKESA	Pass	295	290	99.88	98.44	0	0	0	0	40	0	0	4	1	0	0	99.25	4706945	10295	25325	289	40
100X	Mut_94	SPAdes	Pass	324	291	99.83	98.93	1	0	0	0	46	0	0	27	5	0	0	99.51	4719407	10357	12863	301	40
20X	Mut_94	SKESA	Pass	291	211	98.04	93.45	8	0	0	0	36	0	0	4	69	0	0	95.17	4513298	10040	218972	283	37
20X	Mut_94	SPAdes	Pass	337	291	99.85	98.94	3	0	0	0	46	0	0	39	4	0	0	99.5	4719092	10366	13178	310	40
40X	Mut_94	SKESA	Pass	299	283	99.86	97.89	0	0	0	0	73	0	0	8	8	0	0	98.78	4684933	10295	47337	290	40
40X	Mut_94	SPAdes	Pass	333	291	99.83	98.93	1	0	0	0	46	0	0	32	9	0	0	99.51	4719309	10369	12961	303	40
60X	Mut_94	SKESA	Pass	295	290	99.88	98.34	0	0	0	0	40	0	0	4	1	0	0	99.19	4704142	10295	28128	289	40
60X	Mut_94	SPAdes	Pass	335	292	99.84	98.93	1	0	0	0	46	0	0	39	3	0	0	99.51	4719375	10388	12895	307	40
80X	Mut_94	SKESA	Pass	295	290	99.88	98.4	0	0	0	0	40	0	0	4	1	0	0	99.23	4706086	10295	26184	289	40
80X	Mut_94	SPAdes	Pass	324	295	99.84	98.93	1	0	0	0	46	0	0	27	1	0	0	99.51	4719407	10357	12863	299	40
100X	Mut_95	SKESA	Pass	295	292	99.88	98.46	0	0	0	0	40	0	0	2	1	0	0	99.26	4707693	10312	24577	293	40
100X	Mut_95	SPAdes	Pass	329	293	99.82	98.93	0	0	0	0	44	0	0	34	2	0	0	99.51	4719489	10347	12781	306	40
20X	Mut_95	SKESA	Pass	291	230	98.25	93.6	2	0	0	0	37	0	0	2	58	0	0	95.11	4510513	10112	221757	287	38
20X	Mut_95	SPAdes	Pass	346	300	99.85	98.95	0	0	0	0	46	0	0	45	1	0	0	99.51	4719322	10368	12948	309	40
40X	Mut_95	SKESA	Pass	293	286	99.88	97.93	0	0	0	0	40	0	0	2	5	0	0	98.82	4686534	10215	45736	290	39
40X	Mut_95	SPAdes	Pass	323	292	99.82	98.93	0	0	0	0	44	0	0	28	3	0	0	99.51	4719480	10343	12790	304	40
60X	Mut_95	SKESA	Pass	295	292	99.88	98.36	0	0	0	0	40	0	0	2	1	0	0	99.2	4704844	10312	27426	293	40
60X	Mut_95	SPAdes	Pass	319	296	99.82	98.93	0	0	0	0	44	0	0	17	6	0	0	99.51	4719481	10347	12789	305	40
80X	Mut_95	SKESA	Pass	295	292	99.87	98.41	0	0	0	0	40	0	0	2	1	0	0	99.24	4706753	10312	25517	293	40
80X	Mut_95	SPAdes	Pass	327	292	99.83	98.93	0	0	0	0	46	0	0	31	4	0	0	99.51	4719458	10347	12812	301	40
100X	Mut_96	SKESA	Pass	297	294	99.92	98.48	0	0	0	0	39	0	0	0	3	0	0	99.26	4707473	10368	24797	297	39
100X	Mut_96	SPAdes	Pass	330	296	99.81	98.93	0	0	0	0	45	0	0	30	4	0	0	99.51	4719426	10401	12844	312	39
20X	Mut_96	SKESA	Pass	289	231	98.29	93.66	4	0	0	0	38	0	0	0	54	0	0	95.16	4512788	9974	219482	284	38
20X	Mut_96	SPAdes	Pass	334	301	99.84	98.92	0	0	0	0	45	0	0	27	6	0	0	99.5	4719156	10439	13114	313	39
40X	Mut_96	SKESA	Pass	299	285	99.84	97.89	1	0	0	0	72	0	0	5	8	0	0	98.81	4685920	10306	46350	296	39
40X	Mut_96	SPAdes	Pass	326	298	99.84	98.93	0	0	0	0	45	0	0	24	4	0	0	99.51	4719340	10401	12930	311	39
60X	Mut_96	SKESA	Pass	297	293	99.91	98.4	0	0	0	0	39	0	0	0	4	0	0	99.2	4704782	10368	27488	297	39
60X	Mut_96	SPAdes	Pass	328	298	99.81	98.93	0	0	0	0	45	0	0	25	5	0	0	99.51	4719452	10401	12818	309	39
80X	Mut_96	SKESA	Pass	297	294	99.92	98.45	0	0	0	0	39	0	0	0	3	0	0	99.24	4706513	10368	25757	297	39
80X	Mut_96	SPAdes	Pass	330	296	99.83	98.93	0	0	0	0	45	0	0	30	4	0	0	99.51	4719364	10401	12906	312	39
100X	Mut_97	SKESA	Pass	294	289	99.89	98.45	0	0	0	0	40	0	0	0	5	0	0	99.25	4707032	10306	25238	294	40
100X	Mut_97	SPAdes	Pass	340	289	99.85	98.94	0	0	0	0	46	0	0	46	5	0	0	99.51	4719391	10311	12879	309	40
20X	Mut_97	SKESA	Pass	287	224	98.16	93.52	5	0	0	0	37	0	0	0	59	0	0	95.13	4511288	9939	220982	283	38
20X	Mut_97	SPAdes	Pass	323	290	99.82	98.93	0	0	0	0	46	0	0	22	11	0	0	99.51	4719294	10332	12976	308	40
40X	Mut_97	SKESA	Pass	293	281	99.85	97.88	1	0	0	0	40	0	0	0	11	0	0	98.79	4685131	10261	47139	292	40
40X	Mut_97	SPAdes	Pass	320	289	99.84	98.94	0	0	0	0	44	0	0	26	5	0	0	99.52	4719595	10311	12675	306	40
60X	Mut_97	SKESA	Pass	294	287	99.86	98.35	1	0	0	0	40	0	0	0	6	0	0	99.21	4704993	10292	27277	293	40
60X	Mut_97	SPAdes	Pass	328	289	99.84	98.94	0	0	0	0	46	0	0	32	7	0	0	99.51	4719572	10311	12698	306	40
80X	Mut_97	SKESA	Pass	294	288	99.87	98.39	1	0	0	0	40	0	0	0	5	0	0	99.23	4705958	10306	26312	294	40
80X	Mut_97	SPAdes	Pass	331	289	99.84	98.93	0	0	0	0	46	0	0	33	9	0	0	99.51	4719245	10317	13025	307	40
100X	Mut_98	SKESA	Pass	291	289	99.89	98.45	0	0	0	0	39	0	0	0	2	0	0	99.25	4707026	10157	25244	291	39
100X	Mut_98	SPAdes	Pass	322	293	99.82	98.94	1	0	0	0	46	0	0	24	4	0	0	99.52	4719676	10252	12594	300	40
20X	Mut_98	SKESA	Pass	288	228	98.32	93.7	8	0	0	0	36	0	0	0	52	0	0	95.18	4513387	9892	218883	283	36
20X	Mut_98	SPAdes	Pass	325	297	99.87	98.95	1	0	0	0	46	0	0	25	2	0	0	99.51	4719485	10221	12785	307	40
40X	Mut_98	SKESA	Pass	295	287	99.87	97.9	0	0	0	0	71	0	0	5	3	0	0	98.8	4685622	10128	46648	292	38
40X	Mut_98	SPAdes	Pass	321	296	99.86	98.95	1	0	0	0	46	0	0	20	4	0	0	99.52	4719675	10252	12595	304	40
60X	Mut_98	SKESA	Pass	291	289	99.91	98.38	0	0	0	0	38	0	0	0	2	0	0	99.2	4704309	10128	27961	291	38
60X	Mut_98	SPAdes	Pass	328	294	99.85	98.94	1	0	0	0	46	0	0	29	4	0	0	99.52	4719676	10252	12594	309	40
80X	Mut_98	SKESA	Pass	291	289	99.89	98.42	0	0	0	0	39	0	0	0	2	0	0	99.24	4706484	10157	25786	291	39
80X	Mut_98	SPAdes	Pass	322	293	99.85	98.94	1	0	0	0	46	0	0	24	4	0	0	99.52	4719675	10252	12595	300	40
100X	Mut_99	SKESA	Pass	294	292	99.88	98.44	0	0	0	0	40	0	0	0	2	0	0	99.25	4706810	10306	25460	294	40
100X	Mut_99	SPAdes	Pass	330	297	99.82	98.93	0	0	0	0	46	0	0	26	7	0	0	99.51	4719300	10306	12970	309	40
20X	Mut_99	SKESA	Pass	287	228	98.32	93.59	6	0	0	0	40	0	0	0	53	0	0	95.04	4507170	9987	225100	283	39
20X	Mut_99	SPAdes	Pass	337	298	99.83	98.93	0	0	0	0	46	0	0	31	8	0	0	99.51	4719133	10306	13137	312	40
40X	Mut_99	SKESA	Pass	297	285	99.85	97.88	0	0	0	0	73	0	0	4	8	0	0	98.79	4685334	10275	46936	294	40
40X	Mut_99	SPAdes	Pass	327	297	99.84	98.93	0	0	0	0	46	0	0	24	6	0	0	99.51	4719384	10306	12886	305	40
60X	Mut_99	SKESA	Pass	294	291	99.88	98.34	0	0	0	0	40	0	0	0	3	0	0	99.19	4704025	10306	28245	294	40
60X	Mut_99	SPAdes	Pass	338	297	99.85	98.93	0	0	0	0	46	0	0	36	5	0	0	99.51	4719203	10337	13067	316	40
80X	Mut_99	SKESA	Pass	294	292	99.87	98.39	0	0	0	0	40	0	0	0	2	0	0	99.23	4705836	10306	26434	294	40
80X	Mut_99	SPAdes	Pass	337	297	99.82	98.93	0	0	0	0	46	0	0	35	5	0	0	99.51	4719300	10306	12970	307	40

## Sheet: Table S6
			SNP Pipeline results for SPAdes and SKESA simulated mutant assemblies
Isolate_ID	Assembler	Dataset	Final_CSP2_Distance	True_Positive	Rescued_Positive	Total_Positive	False_Negative_Edge	False_Negative_Other	Missing	False_Positive_Included	False_Positive_Purged
Mut_0	SKESA	20X	283	220	58	278	0	5	17	5	0
Mut_0	SKESA	40X	295	287	8	295	0	1	4	0	4
Mut_0	SKESA	60X	295	291	4	295	1	0	4	0	0
Mut_0	SKESA	80X	295	293	2	295	1	0	4	0	0
Mut_0	SKESA	100X	296	296	0	296	1	0	3	0	0
Mut_0	SPAdes	20X	307	297	0	297	0	0	3	10	35
Mut_0	SPAdes	40X	300	297	0	297	0	0	3	3	23
Mut_0	SPAdes	60X	301	297	0	297	0	0	3	4	25
Mut_0	SPAdes	80X	301	297	0	297	0	0	3	4	31
Mut_0	SPAdes	100X	300	297	0	297	0	0	3	3	28
Mut_1	SKESA	20X	280	219	57	276	2	4	18	4	1
Mut_1	SKESA	40X	289	278	11	289	4	0	7	0	0
Mut_1	SKESA	60X	291	289	2	291	4	0	5	0	0
Mut_1	SKESA	80X	291	290	1	291	4	0	5	0	0
Mut_1	SKESA	100X	291	291	0	291	4	0	5	0	0
Mut_1	SPAdes	20X	303	296	0	296	1	0	3	7	31
Mut_1	SPAdes	40X	299	296	0	296	1	0	3	3	28
Mut_1	SPAdes	60X	300	296	0	296	1	0	3	4	22
Mut_1	SPAdes	80X	300	296	0	296	1	0	3	4	27
Mut_1	SPAdes	100X	300	296	0	296	1	0	3	4	26
Mut_10	SKESA	20X	277	215	56	271	2	5	22	6	0
Mut_10	SKESA	40X	287	283	3	286	2	0	12	1	4
Mut_10	SKESA	60X	286	285	1	286	2	0	12	0	0
Mut_10	SKESA	80X	287	286	1	287	3	0	10	0	0
Mut_10	SKESA	100X	287	287	0	287	3	0	10	0	0
Mut_10	SPAdes	20X	292	288	0	288	3	1	8	4	42
Mut_10	SPAdes	40X	294	289	0	289	4	1	6	5	24
Mut_10	SPAdes	60X	292	289	0	289	4	1	6	3	32
Mut_10	SPAdes	80X	289	288	0	288	3	3	6	1	35
Mut_10	SPAdes	100X	289	288	0	288	4	2	6	1	29
Mut_11	SKESA	20X	284	227	53	280	0	6	14	4	1
Mut_11	SKESA	40X	290	289	1	290	0	1	9	0	4
Mut_11	SKESA	60X	294	293	0	293	0	0	7	1	0
Mut_11	SKESA	80X	293	293	0	293	0	0	7	0	0
Mut_11	SKESA	100X	293	293	0	293	0	0	7	0	0
Mut_11	SPAdes	20X	300	295	0	295	2	0	3	5	35
Mut_11	SPAdes	40X	299	295	0	295	2	0	3	4	16
Mut_11	SPAdes	60X	299	294	0	294	2	0	4	5	37
Mut_11	SPAdes	80X	298	294	0	294	2	1	3	4	33
Mut_11	SPAdes	100X	298	294	0	294	2	0	4	4	38
Mut_12	SKESA	20X	295	226	67	293	0	2	5	2	5
Mut_12	SKESA	40X	300	293	6	299	0	0	1	1	0
Mut_12	SKESA	60X	299	298	1	299	0	0	1	0	0
Mut_12	SKESA	80X	299	298	1	299	0	0	1	0	0
Mut_12	SKESA	100X	299	299	0	299	0	0	1	0	0
Mut_12	SPAdes	20X	305	299	0	299	0	1	0	6	38
Mut_12	SPAdes	40X	300	299	0	299	0	1	0	1	37
Mut_12	SPAdes	60X	302	299	0	299	0	0	1	3	20
Mut_12	SPAdes	80X	299	299	0	299	0	1	0	0	29
Mut_12	SPAdes	100X	300	299	0	299	0	1	0	1	29
Mut_13	SKESA	20X	285	222	61	283	2	3	12	2	0
Mut_13	SKESA	40X	296	290	6	296	2	0	2	0	0
Mut_13	SKESA	60X	296	294	2	296	2	0	2	0	0
Mut_13	SKESA	80X	296	296	0	296	2	0	2	0	0
Mut_13	SKESA	100X	296	296	0	296	2	0	2	0	0
Mut_13	SPAdes	20X	302	296	0	296	3	0	1	6	36
Mut_13	SPAdes	40X	300	296	0	296	2	0	2	4	29
Mut_13	SPAdes	60X	300	296	0	296	2	0	2	4	31
Mut_13	SPAdes	80X	299	296	0	296	2	0	2	3	27
Mut_13	SPAdes	100X	299	296	0	296	2	0	2	3	19
Mut_14	SKESA	20X	270	199	71	270	3	6	21	0	0
Mut_14	SKESA	40X	292	283	7	290	3	0	7	2	4
Mut_14	SKESA	60X	290	290	0	290	3	1	6	0	0
Mut_14	SKESA	80X	290	290	0	290	3	1	6	0	0
Mut_14	SKESA	100X	290	290	0	290	3	1	6	0	0
Mut_14	SPAdes	20X	298	290	0	290	4	2	4	8	24
Mut_14	SPAdes	40X	293	290	0	290	5	2	3	3	15
Mut_14	SPAdes	60X	293	290	0	290	5	2	3	3	25
Mut_14	SPAdes	80X	294	290	0	290	5	2	3	4	27
Mut_14	SPAdes	100X	293	290	0	290	5	2	3	3	25
Mut_15	SKESA	20X	277	214	56	270	0	5	25	7	1
Mut_15	SKESA	40X	289	284	4	288	0	0	12	1	0
Mut_15	SKESA	60X	288	286	2	288	0	0	12	0	0
Mut_15	SKESA	80X	288	287	1	288	0	0	12	0	0
Mut_15	SKESA	100X	288	288	0	288	0	0	12	0	0
Mut_15	SPAdes	20X	294	289	0	289	0	1	10	5	35
Mut_15	SPAdes	40X	292	289	0	289	1	1	9	3	24
Mut_15	SPAdes	60X	292	289	0	289	1	1	9	3	26
Mut_15	SPAdes	80X	292	289	0	289	1	1	9	3	26
Mut_15	SPAdes	100X	292	289	0	289	1	1	9	3	28
Mut_16	SKESA	20X	283	223	59	282	0	5	13	1	2
Mut_16	SKESA	40X	293	288	4	292	0	3	5	1	0
Mut_16	SKESA	60X	293	292	1	293	2	0	5	0	0
Mut_16	SKESA	80X	293	292	1	293	2	0	5	0	0
Mut_16	SKESA	100X	293	293	0	293	2	0	5	0	0
Mut_16	SPAdes	20X	297	294	0	294	2	0	4	3	30
Mut_16	SPAdes	40X	297	294	0	294	2	1	3	3	31
Mut_16	SPAdes	60X	296	293	0	293	2	1	4	3	32
Mut_16	SPAdes	80X	296	293	0	293	2	1	4	3	32
Mut_16	SPAdes	100X	297	294	0	294	2	0	4	3	28
Mut_17	SKESA	20X	277	212	60	272	1	4	23	5	0
Mut_17	SKESA	40X	289	282	7	289	3	0	8	0	6
Mut_17	SKESA	60X	289	287	2	289	4	0	7	0	0
Mut_17	SKESA	80X	289	289	0	289	5	0	6	0	0
Mut_17	SKESA	100X	289	289	0	289	5	0	6	0	0
Mut_17	SPAdes	20X	299	291	1	292	4	0	4	7	25
Mut_17	SPAdes	40X	296	292	0	292	4	0	4	4	25
Mut_17	SPAdes	60X	295	292	0	292	4	0	4	3	33
Mut_17	SPAdes	80X	295	292	0	292	4	0	4	3	29
Mut_17	SPAdes	100X	295	292	0	292	4	0	4	3	23
Mut_18	SKESA	20X	279	210	67	277	0	5	18	2	2
Mut_18	SKESA	40X	292	287	4	291	0	1	8	1	0
Mut_18	SKESA	60X	291	290	1	291	1	0	8	0	0
Mut_18	SKESA	80X	291	291	0	291	1	0	8	0	0
Mut_18	SKESA	100X	292	292	0	292	1	0	7	0	0
Mut_18	SPAdes	20X	297	294	0	294	1	0	5	3	29
Mut_18	SPAdes	40X	298	294	0	294	1	0	5	4	31
Mut_18	SPAdes	60X	299	294	0	294	1	0	5	5	29
Mut_18	SPAdes	80X	298	294	0	294	1	0	5	4	31
Mut_18	SPAdes	100X	298	294	0	294	1	0	5	4	29
Mut_19	SKESA	20X	283	223	57	280	0	3	17	3	1
Mut_19	SKESA	40X	294	287	6	293	2	0	5	1	0
Mut_19	SKESA	60X	293	293	0	293	2	0	5	0	0
Mut_19	SKESA	80X	294	294	0	294	2	0	4	0	0
Mut_19	SKESA	100X	294	294	0	294	2	0	4	0	0
Mut_19	SPAdes	20X	298	295	0	295	2	0	3	3	35
Mut_19	SPAdes	40X	297	295	0	295	2	0	3	2	29
Mut_19	SPAdes	60X	297	295	0	295	2	0	3	2	24
Mut_19	SPAdes	80X	296	295	0	295	2	0	3	1	32
Mut_19	SPAdes	100X	297	295	0	295	2	0	3	2	29
Mut_2	SKESA	20X	272	205	67	272	1	1	26	0	1
Mut_2	SKESA	40X	288	282	6	288	1	1	10	0	4
Mut_2	SKESA	60X	291	290	1	291	2	0	7	0	0
Mut_2	SKESA	80X	291	291	0	291	3	0	6	0	0
Mut_2	SKESA	100X	291	291	0	291	3	0	6	0	0
Mut_2	SPAdes	20X	298	293	0	293	1	0	6	5	33
Mut_2	SPAdes	40X	295	292	0	292	1	0	7	3	27
Mut_2	SPAdes	60X	295	291	0	291	1	2	6	4	23
Mut_2	SPAdes	80X	297	292	0	292	1	0	7	5	19
Mut_2	SPAdes	100X	295	292	0	292	1	0	7	3	31
Mut_20	SKESA	20X	289	234	52	286	0	1	13	3	1
Mut_20	SKESA	40X	293	290	3	293	1	0	6	0	0
Mut_20	SKESA	60X	293	293	0	293	1	0	6	0	0
Mut_20	SKESA	80X	293	293	0	293	1	0	6	0	0
Mut_20	SKESA	100X	293	293	0	293	1	0	6	0	0
Mut_20	SPAdes	20X	300	294	0	294	0	0	6	6	31
Mut_20	SPAdes	40X	297	294	0	294	0	0	6	3	31
Mut_20	SPAdes	60X	297	294	0	294	0	0	6	3	26
Mut_20	SPAdes	80X	297	294	0	294	0	0	6	3	24
Mut_20	SPAdes	100X	297	294	0	294	0	0	6	3	26
Mut_21	SKESA	20X	286	219	62	281	1	3	15	5	2
Mut_21	SKESA	40X	289	285	4	289	1	0	10	0	0
Mut_21	SKESA	60X	289	289	0	289	3	0	8	0	0
Mut_21	SKESA	80X	291	291	0	291	3	0	6	0	0
Mut_21	SKESA	100X	291	291	0	291	3	0	6	0	0
Mut_21	SPAdes	20X	291	291	0	291	1	3	5	0	26
Mut_21	SPAdes	40X	296	292	0	292	1	1	6	4	30
Mut_21	SPAdes	60X	295	292	0	292	1	1	6	3	27
Mut_21	SPAdes	80X	295	292	0	292	1	1	6	3	17
Mut_21	SPAdes	100X	296	292	0	292	1	1	6	4	36
Mut_22	SKESA	20X	292	224	64	288	0	4	8	4	1
Mut_22	SKESA	40X	298	294	4	298	0	0	2	0	0
Mut_22	SKESA	60X	298	298	0	298	0	0	2	0	0
Mut_22	SKESA	80X	298	298	0	298	0	0	2	0	0
Mut_22	SKESA	100X	298	298	0	298	0	0	2	0	0
Mut_22	SPAdes	20X	305	299	0	299	0	0	1	6	23
Mut_22	SPAdes	40X	301	298	0	298	0	0	2	3	27
Mut_22	SPAdes	60X	305	299	0	299	0	0	1	6	28
Mut_22	SPAdes	80X	302	298	0	298	0	1	1	4	29
Mut_22	SPAdes	100X	301	298	0	298	0	0	2	3	32
Mut_23	SKESA	20X	281	218	61	279	1	6	14	2	2
Mut_23	SKESA	40X	297	292	3	295	1	0	4	2	4
Mut_23	SKESA	60X	295	295	0	295	2	0	3	0	0
Mut_23	SKESA	80X	295	295	0	295	2	0	3	0	0
Mut_23	SKESA	100X	295	295	0	295	2	0	3	0	0
Mut_23	SPAdes	20X	294	294	0	294	2	1	3	0	30
Mut_23	SPAdes	40X	296	294	0	294	2	1	3	2	20
Mut_23	SPAdes	60X	298	295	0	295	2	0	3	3	26
Mut_23	SPAdes	80X	301	295	0	295	2	0	3	6	29
Mut_23	SPAdes	100X	299	295	0	295	2	0	3	4	21
Mut_24	SKESA	20X	284	219	61	280	0	7	13	4	0
Mut_24	SKESA	40X	295	289	6	295	1	1	3	0	4
Mut_24	SKESA	60X	296	294	2	296	1	0	3	0	0
Mut_24	SKESA	80X	297	295	2	297	1	0	2	0	0
Mut_24	SKESA	100X	298	298	0	298	1	0	1	0	0
Mut_24	SPAdes	20X	301	298	0	298	1	1	0	3	26
Mut_24	SPAdes	40X	301	298	0	298	1	1	0	3	26
Mut_24	SPAdes	60X	302	298	0	298	1	1	0	4	25
Mut_24	SPAdes	80X	301	298	0	298	1	1	0	3	28
Mut_24	SPAdes	100X	301	298	0	298	1	1	0	3	26
Mut_25	SKESA	20X	283	223	58	281	2	3	14	2	0
Mut_25	SKESA	40X	294	289	4	293	3	0	4	1	0
Mut_25	SKESA	60X	295	295	0	295	3	0	2	0	0
Mut_25	SKESA	80X	295	295	0	295	3	0	2	0	0
Mut_25	SKESA	100X	295	295	0	295	3	0	2	0	0
Mut_25	SPAdes	20X	303	297	1	298	0	0	2	5	21
Mut_25	SPAdes	40X	303	298	0	298	0	0	2	5	27
Mut_25	SPAdes	60X	302	298	0	298	0	0	2	4	26
Mut_25	SPAdes	80X	302	298	0	298	0	0	2	4	32
Mut_25	SPAdes	100X	302	298	0	298	0	0	2	4	32
Mut_26	SKESA	20X	278	226	51	277	1	8	14	1	1
Mut_26	SKESA	40X	291	283	8	291	2	1	6	0	0
Mut_26	SKESA	60X	294	294	0	294	3	0	3	0	0
Mut_26	SKESA	80X	294	294	0	294	3	0	3	0	0
Mut_26	SKESA	100X	294	294	0	294	3	0	3	0	0
Mut_26	SPAdes	20X	300	295	0	295	3	0	2	5	41
Mut_26	SPAdes	40X	300	295	0	295	3	0	2	5	31
Mut_26	SPAdes	60X	300	295	0	295	3	0	2	5	15
Mut_26	SPAdes	80X	301	295	0	295	3	0	2	6	22
Mut_26	SPAdes	100X	300	295	0	295	3	0	2	5	18
Mut_27	SKESA	20X	282	225	52	277	1	7	15	5	1
Mut_27	SKESA	40X	291	285	6	291	3	0	6	0	0
Mut_27	SKESA	60X	291	290	1	291	4	0	5	0	0
Mut_27	SKESA	80X	291	290	1	291	4	0	5	0	0
Mut_27	SKESA	100X	291	291	0	291	4	0	5	0	0
Mut_27	SPAdes	20X	297	293	0	293	2	0	5	4	32
Mut_27	SPAdes	40X	296	293	0	293	2	0	5	3	21
Mut_27	SPAdes	60X	298	293	0	293	2	0	5	5	23
Mut_27	SPAdes	80X	297	293	0	293	2	0	5	4	22
Mut_27	SPAdes	100X	297	293	0	293	2	0	5	4	25
Mut_28	SKESA	20X	274	191	82	273	1	10	16	1	4
Mut_28	SKESA	40X	292	287	4	291	2	0	7	1	4
Mut_28	SKESA	60X	293	293	0	293	3	0	4	0	0
Mut_28	SKESA	80X	293	293	0	293	3	0	4	0	0
Mut_28	SKESA	100X	293	293	0	293	3	0	4	0	0
Mut_28	SPAdes	20X	295	294	0	294	1	2	3	1	34
Mut_28	SPAdes	40X	295	294	0	294	1	2	3	1	23
Mut_28	SPAdes	60X	294	294	0	294	1	2	3	0	31
Mut_28	SPAdes	80X	294	294	0	294	1	2	3	0	30
Mut_28	SPAdes	100X	294	294	0	294	1	2	3	0	29
Mut_29	SKESA	20X	285	225	55	280	2	6	12	5	0
Mut_29	SKESA	40X	295	284	10	294	4	0	2	1	0
Mut_29	SKESA	60X	294	294	0	294	5	0	1	0	0
Mut_29	SKESA	80X	294	294	0	294	5	0	1	0	0
Mut_29	SKESA	100X	294	294	0	294	5	0	1	0	0
Mut_29	SPAdes	20X	308	299	0	299	0	0	1	9	30
Mut_29	SPAdes	40X	305	299	0	299	0	0	1	6	28
Mut_29	SPAdes	60X	303	299	0	299	0	0	1	4	32
Mut_29	SPAdes	80X	302	299	0	299	0	1	0	3	22
Mut_29	SPAdes	100X	302	299	0	299	0	1	0	3	21
Mut_3	SKESA	20X	285	223	58	281	2	4	13	4	2
Mut_3	SKESA	40X	289	281	8	289	2	0	9	0	0
Mut_3	SKESA	60X	290	290	0	290	2	0	8	0	0
Mut_3	SKESA	80X	291	291	0	291	2	0	7	0	0
Mut_3	SKESA	100X	291	291	0	291	2	0	7	0	0
Mut_3	SPAdes	20X	296	292	0	292	2	1	5	4	43
Mut_3	SPAdes	40X	294	291	0	291	2	2	5	3	20
Mut_3	SPAdes	60X	298	292	0	292	2	2	4	6	26
Mut_3	SPAdes	80X	293	292	0	292	2	2	4	1	39
Mut_3	SPAdes	100X	293	292	0	292	2	2	4	1	34
Mut_30	SKESA	20X	276	212	61	273	1	7	19	3	1
Mut_30	SKESA	40X	291	285	6	291	1	1	7	0	0
Mut_30	SKESA	60X	292	292	0	292	3	0	5	0	0
Mut_30	SKESA	80X	292	292	0	292	3	0	5	0	0
Mut_30	SKESA	100X	292	292	0	292	3	0	5	0	0
Mut_30	SPAdes	20X	298	293	0	293	1	1	5	5	30
Mut_30	SPAdes	40X	296	293	0	293	1	1	5	3	30
Mut_30	SPAdes	60X	296	293	0	293	1	1	5	3	18
Mut_30	SPAdes	80X	296	293	0	293	1	1	5	3	25
Mut_30	SPAdes	100X	296	293	0	293	1	1	5	3	32
Mut_31	SKESA	20X	285	212	72	284	2	5	9	1	3
Mut_31	SKESA	40X	294	283	10	293	2	2	3	1	4
Mut_31	SKESA	60X	296	296	0	296	2	0	2	0	0
Mut_31	SKESA	80X	296	296	0	296	2	0	2	0	0
Mut_31	SKESA	100X	296	296	0	296	2	0	2	0	0
Mut_31	SPAdes	20X	305	297	0	297	1	0	2	8	41
Mut_31	SPAdes	40X	299	296	0	296	1	1	2	3	29
Mut_31	SPAdes	60X	301	297	0	297	1	0	2	4	28
Mut_31	SPAdes	80X	301	297	0	297	1	0	2	4	28
Mut_31	SPAdes	100X	303	297	0	297	1	0	2	6	24
Mut_32	SKESA	20X	287	226	56	282	1	5	12	5	0
Mut_32	SKESA	40X	292	285	7	292	1	0	7	0	0
Mut_32	SKESA	60X	293	292	1	293	1	0	6	0	0
Mut_32	SKESA	80X	293	292	1	293	1	0	6	0	0
Mut_32	SKESA	100X	293	293	0	293	1	0	6	0	0
Mut_32	SPAdes	20X	303	295	0	295	2	0	3	8	31
Mut_32	SPAdes	40X	298	295	0	295	3	0	2	3	32
Mut_32	SPAdes	60X	298	295	0	295	3	0	2	3	26
Mut_32	SPAdes	80X	298	295	0	295	3	0	2	3	25
Mut_32	SPAdes	100X	298	295	0	295	3	0	2	3	28
Mut_33	SKESA	20X	285	225	59	284	1	3	12	1	3
Mut_33	SKESA	40X	293	285	8	293	1	0	6	0	0
Mut_33	SKESA	60X	295	295	0	295	1	0	4	0	0
Mut_33	SKESA	80X	295	295	0	295	1	0	4	0	0
Mut_33	SKESA	100X	295	295	0	295	1	0	4	0	0
Mut_33	SPAdes	20X	301	295	0	295	2	1	2	6	34
Mut_33	SPAdes	40X	301	296	0	296	2	0	2	5	26
Mut_33	SPAdes	60X	299	296	0	296	1	0	3	3	31
Mut_33	SPAdes	80X	300	296	0	296	1	0	3	4	17
Mut_33	SPAdes	100X	299	296	0	296	1	0	3	3	15
Mut_34	SKESA	20X	278	228	47	275	2	8	15	3	1
Mut_34	SKESA	40X	293	288	4	292	2	0	6	1	4
Mut_34	SKESA	60X	292	291	1	292	2	0	6	0	0
Mut_34	SKESA	80X	292	292	0	292	2	0	6	0	0
Mut_34	SKESA	100X	292	291	1	292	2	0	6	0	0
Mut_34	SPAdes	20X	301	294	0	294	0	1	5	7	32
Mut_34	SPAdes	40X	298	294	0	294	0	1	5	4	28
Mut_34	SPAdes	60X	298	294	0	294	0	1	5	4	29
Mut_34	SPAdes	80X	298	294	0	294	0	1	5	4	23
Mut_34	SPAdes	100X	298	294	0	294	0	1	5	4	32
Mut_35	SKESA	20X	278	216	59	275	4	9	12	3	3
Mut_35	SKESA	40X	293	291	2	293	4	0	3	0	4
Mut_35	SKESA	60X	294	294	0	294	5	0	1	0	0
Mut_35	SKESA	80X	294	294	0	294	5	0	1	0	0
Mut_35	SKESA	100X	294	294	0	294	5	1	0	0	0
Mut_35	SPAdes	20X	302	298	0	298	0	1	1	4	35
Mut_35	SPAdes	40X	303	299	0	299	0	1	0	4	23
Mut_35	SPAdes	60X	298	298	0	298	0	1	1	0	33
Mut_35	SPAdes	80X	303	299	0	299	0	0	1	4	18
Mut_35	SPAdes	100X	299	298	0	298	0	1	1	1	21
Mut_36	SKESA	20X	287	213	71	284	0	2	14	3	2
Mut_36	SKESA	40X	295	288	7	295	1	0	4	0	0
Mut_36	SKESA	60X	295	295	0	295	1	0	4	0	0
Mut_36	SKESA	80X	295	295	0	295	2	0	3	0	0
Mut_36	SKESA	100X	295	295	0	295	2	0	3	0	0
Mut_36	SPAdes	20X	301	296	0	296	1	0	3	5	32
Mut_36	SPAdes	40X	301	296	0	296	1	0	3	5	27
Mut_36	SPAdes	60X	301	296	0	296	1	0	3	5	30
Mut_36	SPAdes	80X	300	296	0	296	1	0	3	4	39
Mut_36	SPAdes	100X	302	296	0	296	1	0	3	6	25
Mut_37	SKESA	20X	285	228	54	282	1	5	12	3	2
Mut_37	SKESA	40X	294	289	5	294	1	0	5	0	4
Mut_37	SKESA	60X	294	293	1	294	1	0	5	0	0
Mut_37	SKESA	80X	294	294	0	294	1	0	5	0	0
Mut_37	SKESA	100X	294	294	0	294	2	0	4	0	0
Mut_37	SPAdes	20X	298	294	0	294	2	1	3	4	24
Mut_37	SPAdes	40X	296	295	0	295	2	1	2	1	23
Mut_37	SPAdes	60X	294	293	0	293	2	1	4	1	31
Mut_37	SPAdes	80X	294	293	0	293	2	1	4	1	21
Mut_37	SPAdes	100X	294	293	0	293	2	1	4	1	21
Mut_38	SKESA	20X	284	216	65	281	1	7	11	3	0
Mut_38	SKESA	40X	294	284	9	293	1	1	5	1	4
Mut_38	SKESA	60X	295	294	1	295	1	0	4	0	1
Mut_38	SKESA	80X	295	295	0	295	1	0	4	0	0
Mut_38	SKESA	100X	295	295	0	295	1	0	4	0	0
Mut_38	SPAdes	20X	299	296	0	296	0	0	4	3	30
Mut_38	SPAdes	40X	299	296	0	296	1	0	3	3	28
Mut_38	SPAdes	60X	299	296	0	296	1	0	3	3	24
Mut_38	SPAdes	80X	299	296	0	296	1	0	3	3	29
Mut_38	SPAdes	100X	299	296	0	296	1	0	3	3	18
Mut_39	SKESA	20X	275	205	68	273	4	7	16	2	3
Mut_39	SKESA	40X	290	280	10	290	4	0	6	0	4
Mut_39	SKESA	60X	290	289	1	290	4	0	6	0	0
Mut_39	SKESA	80X	290	290	0	290	4	0	6	0	0
Mut_39	SKESA	100X	290	290	0	290	4	0	6	0	0
Mut_39	SPAdes	20X	298	293	0	293	2	0	5	5	28
Mut_39	SPAdes	40X	296	293	0	293	2	0	5	3	29
Mut_39	SPAdes	60X	298	293	0	293	2	0	5	5	19
Mut_39	SPAdes	80X	298	293	0	293	2	0	5	5	22
Mut_39	SPAdes	100X	298	293	0	293	2	0	5	5	19
Mut_4	SKESA	20X	283	209	70	279	1	6	14	4	0
Mut_4	SKESA	40X	296	290	5	295	2	0	3	1	4
Mut_4	SKESA	60X	295	294	1	295	2	0	3	0	0
Mut_4	SKESA	80X	295	295	0	295	2	0	3	0	0
Mut_4	SKESA	100X	295	295	0	295	2	0	3	0	0
Mut_4	SPAdes	20X	297	297	0	297	0	0	3	0	32
Mut_4	SPAdes	40X	300	297	0	297	0	0	3	3	33
Mut_4	SPAdes	60X	302	298	0	298	0	0	2	4	27
Mut_4	SPAdes	80X	301	297	0	297	0	0	3	4	23
Mut_4	SPAdes	100X	300	297	0	297	0	0	3	3	29
Mut_40	SKESA	20X	283	214	66	280	1	5	14	3	2
Mut_40	SKESA	40X	293	288	5	293	1	1	5	0	0
Mut_40	SKESA	60X	294	292	2	294	2	0	4	0	0
Mut_40	SKESA	80X	294	294	0	294	2	0	4	0	0
Mut_40	SKESA	100X	294	294	0	294	2	0	4	0	0
Mut_40	SPAdes	20X	303	296	0	296	3	0	1	7	37
Mut_40	SPAdes	40X	299	296	0	296	3	0	1	3	18
Mut_40	SPAdes	60X	298	295	0	295	3	1	1	3	34
Mut_40	SPAdes	80X	299	296	0	296	3	0	1	3	19
Mut_40	SPAdes	100X	299	296	0	296	3	0	1	3	18
Mut_41	SKESA	20X	277	212	63	275	1	6	18	2	4
Mut_41	SKESA	40X	292	285	7	292	1	0	7	0	0
Mut_41	SKESA	60X	292	291	1	292	2	0	6	0	0
Mut_41	SKESA	80X	292	292	0	292	2	0	6	0	0
Mut_41	SKESA	100X	292	292	0	292	2	0	6	0	0
Mut_41	SPAdes	20X	301	295	0	295	0	0	5	6	25
Mut_41	SPAdes	40X	299	295	0	295	0	0	5	4	31
Mut_41	SPAdes	60X	299	295	0	295	0	0	5	4	15
Mut_41	SPAdes	80X	298	295	0	295	0	0	5	3	24
Mut_41	SPAdes	100X	298	295	0	295	0	0	5	3	21
Mut_42	SKESA	20X	281	216	63	279	0	3	18	2	1
Mut_42	SKESA	40X	290	287	3	290	1	0	9	0	0
Mut_42	SKESA	60X	292	292	0	292	2	0	6	0	0
Mut_42	SKESA	80X	292	292	0	292	2	0	6	0	0
Mut_42	SKESA	100X	292	292	0	292	2	0	6	0	0
Mut_42	SPAdes	20X	299	293	0	293	2	1	4	6	34
Mut_42	SPAdes	40X	293	292	0	292	2	1	5	1	26
Mut_42	SPAdes	60X	296	293	0	293	2	0	5	3	25
Mut_42	SPAdes	80X	296	293	0	293	2	0	5	3	31
Mut_42	SPAdes	100X	296	293	0	293	2	0	5	3	30
Mut_43	SKESA	20X	281	218	61	279	1	5	15	2	1
Mut_43	SKESA	40X	293	291	2	293	1	0	6	0	4
Mut_43	SKESA	60X	293	293	0	293	2	0	5	0	0
Mut_43	SKESA	80X	293	293	0	293	2	0	5	0	0
Mut_43	SKESA	100X	293	293	0	293	2	0	5	0	0
Mut_43	SPAdes	20X	301	294	0	294	1	0	5	7	38
Mut_43	SPAdes	40X	297	294	0	294	1	0	5	3	27
Mut_43	SPAdes	60X	298	294	0	294	1	1	4	4	19
Mut_43	SPAdes	80X	298	295	0	295	1	0	4	3	18
Mut_43	SPAdes	100X	298	295	0	295	1	0	4	3	19
Mut_44	SKESA	20X	284	229	54	283	2	4	11	1	2
Mut_44	SKESA	40X	291	288	2	290	2	0	8	1	4
Mut_44	SKESA	60X	292	291	1	292	2	0	6	0	0
Mut_44	SKESA	80X	292	292	0	292	2	0	6	0	0
Mut_44	SKESA	100X	292	292	0	292	3	0	5	0	0
Mut_44	SPAdes	20X	301	295	0	295	1	0	4	6	35
Mut_44	SPAdes	40X	298	295	0	295	1	0	4	3	22
Mut_44	SPAdes	60X	296	294	0	294	1	1	4	2	34
Mut_44	SPAdes	80X	298	295	0	295	0	1	4	3	31
Mut_44	SPAdes	100X	298	295	0	295	1	0	4	3	34
Mut_45	SKESA	20X	285	227	57	284	1	1	14	1	2
Mut_45	SKESA	40X	291	288	3	291	1	0	8	0	0
Mut_45	SKESA	60X	292	292	0	292	1	0	7	0	0
Mut_45	SKESA	80X	292	292	0	292	1	0	7	0	0
Mut_45	SKESA	100X	292	292	0	292	1	0	7	0	0
Mut_45	SPAdes	20X	300	293	0	293	1	0	6	7	19
Mut_45	SPAdes	40X	296	293	0	293	1	0	6	3	25
Mut_45	SPAdes	60X	298	294	0	294	1	0	5	4	25
Mut_45	SPAdes	80X	298	294	0	294	1	0	5	4	25
Mut_45	SPAdes	100X	299	294	0	294	1	0	5	5	31
Mut_46	SKESA	20X	276	207	66	273	3	10	14	3	1
Mut_46	SKESA	40X	291	283	8	291	3	0	6	0	0
Mut_46	SKESA	60X	291	290	1	291	3	0	6	0	0
Mut_46	SKESA	80X	291	291	0	291	3	0	6	0	0
Mut_46	SKESA	100X	291	291	0	291	3	0	6	0	0
Mut_46	SPAdes	20X	297	293	0	293	1	1	5	4	29
Mut_46	SPAdes	40X	296	293	0	293	1	1	5	3	25
Mut_46	SPAdes	60X	296	293	0	293	2	1	4	3	33
Mut_46	SPAdes	80X	296	293	0	293	1	1	5	3	26
Mut_46	SPAdes	100X	296	293	0	293	1	1	5	3	25
Mut_47	SKESA	20X	276	218	55	273	3	6	18	3	1
Mut_47	SKESA	40X	287	278	9	287	3	0	10	0	0
Mut_47	SKESA	60X	288	287	1	288	4	0	8	0	0
Mut_47	SKESA	80X	288	288	0	288	4	0	8	0	0
Mut_47	SKESA	100X	288	288	0	288	4	0	8	0	0
Mut_47	SPAdes	20X	297	291	0	291	3	0	6	6	22
Mut_47	SPAdes	40X	296	291	0	291	3	0	6	5	32
Mut_47	SPAdes	60X	296	291	0	291	3	0	6	5	20
Mut_47	SPAdes	80X	294	291	0	291	3	1	5	3	18
Mut_47	SPAdes	100X	295	291	0	291	3	1	5	4	15
Mut_48	SKESA	20X	287	231	52	283	1	3	13	4	0
Mut_48	SKESA	40X	289	283	5	288	3	0	9	1	0
Mut_48	SKESA	60X	288	286	2	288	3	0	9	0	0
Mut_48	SKESA	80X	288	287	1	288	3	0	9	0	0
Mut_48	SKESA	100X	288	288	0	288	3	0	9	0	0
Mut_48	SPAdes	20X	297	290	0	290	2	1	7	7	26
Mut_48	SPAdes	40X	293	290	0	290	2	1	7	3	30
Mut_48	SPAdes	60X	294	290	0	290	2	1	7	4	25
Mut_48	SPAdes	80X	294	290	0	290	2	1	7	4	28
Mut_48	SPAdes	100X	293	290	0	290	2	1	7	3	30
Mut_49	SKESA	20X	287	236	45	281	2	3	14	6	1
Mut_49	SKESA	40X	296	293	2	295	2	0	3	1	4
Mut_49	SKESA	60X	295	295	0	295	3	0	2	0	0
Mut_49	SKESA	80X	295	295	0	295	3	0	2	0	0
Mut_49	SKESA	100X	295	295	0	295	3	0	2	0	0
Mut_49	SPAdes	20X	301	295	0	295	2	1	2	6	30
Mut_49	SPAdes	40X	300	296	0	296	2	0	2	4	30
Mut_49	SPAdes	60X	300	296	0	296	2	0	2	4	25
Mut_49	SPAdes	80X	299	296	0	296	2	0	2	3	30
Mut_49	SPAdes	100X	300	296	0	296	2	0	2	4	30
Mut_5	SKESA	20X	280	213	59	272	1	2	25	8	1
Mut_5	SKESA	40X	288	279	9	288	2	0	10	0	0
Mut_5	SKESA	60X	290	288	1	289	4	0	7	1	0
Mut_5	SKESA	80X	289	289	0	289	5	0	6	0	0
Mut_5	SKESA	100X	289	289	0	289	5	0	6	0	0
Mut_5	SPAdes	20X	294	288	1	289	2	2	7	5	40
Mut_5	SPAdes	40X	296	292	0	292	2	0	6	4	27
Mut_5	SPAdes	60X	294	291	0	291	2	1	6	3	31
Mut_5	SPAdes	80X	297	292	0	292	2	0	6	5	18
Mut_5	SPAdes	100X	294	291	0	291	2	0	7	3	41
Mut_50	SKESA	20X	285	228	53	281	2	5	12	4	0
Mut_50	SKESA	40X	294	287	6	293	3	0	4	1	4
Mut_50	SKESA	60X	294	294	0	294	3	0	3	0	0
Mut_50	SKESA	80X	294	294	0	294	3	0	3	0	0
Mut_50	SKESA	100X	294	294	0	294	3	0	3	0	0
Mut_50	SPAdes	20X	307	297	0	297	1	0	2	10	17
Mut_50	SPAdes	40X	303	297	0	297	1	0	2	6	24
Mut_50	SPAdes	60X	305	297	0	297	1	0	2	8	20
Mut_50	SPAdes	80X	302	297	0	297	1	0	2	5	14
Mut_50	SPAdes	100X	302	297	0	297	1	0	2	5	23
Mut_51	SKESA	20X	288	211	68	279	0	6	15	9	0
Mut_51	SKESA	40X	294	284	10	294	2	0	4	0	0
Mut_51	SKESA	60X	294	293	1	294	2	0	4	0	0
Mut_51	SKESA	80X	294	293	1	294	3	0	3	0	0
Mut_51	SKESA	100X	294	294	0	294	3	0	3	0	0
Mut_51	SPAdes	20X	303	297	0	297	1	0	2	6	23
Mut_51	SPAdes	40X	300	297	0	297	1	0	2	3	22
Mut_51	SPAdes	60X	300	297	0	297	1	0	2	3	29
Mut_51	SPAdes	80X	296	296	0	296	1	1	2	0	37
Mut_51	SPAdes	100X	296	296	0	296	1	1	2	0	38
Mut_52	SKESA	20X	283	227	54	281	3	5	11	2	3
Mut_52	SKESA	40X	293	288	5	293	4	0	3	0	0
Mut_52	SKESA	60X	294	293	1	294	4	0	2	0	0
Mut_52	SKESA	80X	294	294	0	294	4	0	2	0	0
Mut_52	SKESA	100X	294	294	0	294	4	0	2	0	0
Mut_52	SPAdes	20X	300	296	0	296	3	0	1	4	24
Mut_52	SPAdes	40X	299	296	0	296	3	0	1	3	26
Mut_52	SPAdes	60X	299	296	0	296	3	0	1	3	23
Mut_52	SPAdes	80X	301	296	0	296	3	0	1	5	30
Mut_52	SPAdes	100X	299	296	0	296	3	0	1	3	23
Mut_53	SKESA	20X	286	220	65	285	1	5	9	1	2
Mut_53	SKESA	40X	292	281	11	292	3	0	5	0	0
Mut_53	SKESA	60X	294	292	2	294	4	0	2	0	0
Mut_53	SKESA	80X	294	293	1	294	4	0	2	0	0
Mut_53	SKESA	100X	294	294	0	294	4	0	2	0	0
Mut_53	SPAdes	20X	303	297	0	297	2	0	1	6	42
Mut_53	SPAdes	40X	300	297	0	297	2	0	1	3	23
Mut_53	SPAdes	60X	300	297	0	297	2	0	1	3	28
Mut_53	SPAdes	80X	300	297	0	297	2	0	1	3	26
Mut_53	SPAdes	100X	301	297	0	297	2	0	1	4	26
Mut_54	SKESA	20X	284	222	61	283	1	4	12	1	2
Mut_54	SKESA	40X	295	290	5	295	1	0	4	0	0
Mut_54	SKESA	60X	295	292	3	295	1	0	4	0	0
Mut_54	SKESA	80X	295	294	1	295	1	0	4	0	0
Mut_54	SKESA	100X	295	295	0	295	1	0	4	0	0
Mut_54	SPAdes	20X	303	295	0	295	1	0	4	8	35
Mut_54	SPAdes	40X	298	295	0	295	0	1	4	3	36
Mut_54	SPAdes	60X	300	295	0	295	0	1	4	5	32
Mut_54	SPAdes	80X	298	295	0	295	1	1	3	3	23
Mut_54	SPAdes	100X	298	295	0	295	1	0	4	3	27
Mut_55	SKESA	20X	281	222	55	277	1	7	15	4	2
Mut_55	SKESA	40X	296	285	10	295	2	0	3	1	4
Mut_55	SKESA	60X	295	295	0	295	2	0	3	0	0
Mut_55	SKESA	80X	295	295	0	295	2	0	3	0	0
Mut_55	SKESA	100X	295	295	0	295	2	0	3	0	0
Mut_55	SPAdes	20X	301	297	0	297	0	0	3	4	34
Mut_55	SPAdes	40X	301	297	0	297	0	0	3	4	29
Mut_55	SPAdes	60X	299	296	0	296	0	1	3	3	19
Mut_55	SPAdes	80X	302	297	0	297	0	0	3	5	26
Mut_55	SPAdes	100X	299	296	0	296	0	1	3	3	19
Mut_56	SKESA	20X	281	212	64	276	0	5	19	5	0
Mut_56	SKESA	40X	290	280	10	290	0	2	8	0	4
Mut_56	SKESA	60X	293	292	1	293	1	0	6	0	0
Mut_56	SKESA	80X	293	293	0	293	1	0	6	0	0
Mut_56	SKESA	100X	293	293	0	293	1	0	6	0	0
Mut_56	SPAdes	20X	297	292	0	292	1	2	5	5	35
Mut_56	SPAdes	40X	296	293	0	293	2	0	5	3	30
Mut_56	SPAdes	60X	298	294	0	294	1	1	4	4	27
Mut_56	SPAdes	80X	297	294	0	294	1	1	4	3	26
Mut_56	SPAdes	100X	297	293	0	293	1	2	4	4	31
Mut_57	SKESA	20X	283	226	52	278	2	4	16	5	3
Mut_57	SKESA	40X	292	283	6	289	2	1	8	3	4
Mut_57	SKESA	60X	292	289	3	292	2	0	6	0	0
Mut_57	SKESA	80X	292	291	1	292	2	0	6	0	0
Mut_57	SKESA	100X	293	293	0	293	2	0	5	0	0
Mut_57	SPAdes	20X	298	294	1	295	2	0	3	3	36
Mut_57	SPAdes	40X	300	294	0	294	2	0	4	6	20
Mut_57	SPAdes	60X	297	293	1	294	2	1	3	3	39
Mut_57	SPAdes	80X	298	295	0	295	2	0	3	3	27
Mut_57	SPAdes	100X	298	295	0	295	2	0	3	3	38
Mut_58	SKESA	20X	294	227	59	286	2	3	9	8	1
Mut_58	SKESA	40X	294	288	5	293	3	0	4	1	4
Mut_58	SKESA	60X	294	294	0	294	3	0	3	0	0
Mut_58	SKESA	80X	294	294	0	294	3	0	3	0	0
Mut_58	SKESA	100X	294	294	0	294	3	0	3	0	0
Mut_58	SPAdes	20X	303	296	0	296	0	1	3	7	47
Mut_58	SPAdes	40X	300	297	0	297	0	1	2	3	29
Mut_58	SPAdes	60X	301	297	0	297	0	1	2	4	31
Mut_58	SPAdes	80X	300	297	0	297	0	1	2	3	21
Mut_58	SPAdes	100X	300	297	0	297	0	1	2	3	30
Mut_59	SKESA	20X	285	217	63	280	2	6	12	5	0
Mut_59	SKESA	40X	291	288	3	291	4	0	5	0	0
Mut_59	SKESA	60X	292	292	0	292	5	0	3	0	0
Mut_59	SKESA	80X	292	292	0	292	6	0	2	0	0
Mut_59	SKESA	100X	292	292	0	292	8	0	0	0	0
Mut_59	SPAdes	20X	301	295	0	295	3	2	0	6	32
Mut_59	SPAdes	40X	301	296	0	296	3	0	1	5	18
Mut_59	SPAdes	60X	300	296	0	296	3	1	0	4	36
Mut_59	SPAdes	80X	303	296	0	296	3	0	1	7	34
Mut_59	SPAdes	100X	299	296	0	296	3	0	1	3	30
Mut_6	SKESA	20X	276	207	65	272	0	3	25	4	1
Mut_6	SKESA	40X	288	279	9	288	1	1	10	0	0
Mut_6	SKESA	60X	289	289	0	289	2	0	9	0	0
Mut_6	SKESA	80X	289	289	0	289	3	0	8	0	0
Mut_6	SKESA	100X	289	289	0	289	3	0	8	0	0
Mut_6	SPAdes	20X	295	291	0	291	2	0	7	4	20
Mut_6	SPAdes	40X	295	291	0	291	2	0	7	4	34
Mut_6	SPAdes	60X	296	291	0	291	2	0	7	5	28
Mut_6	SPAdes	80X	294	291	0	291	2	0	7	3	27
Mut_6	SPAdes	100X	294	291	0	291	2	0	7	3	32
Mut_60	SKESA	20X	292	224	64	288	1	3	8	4	2
Mut_60	SKESA	40X	296	287	8	295	1	0	4	1	4
Mut_60	SKESA	60X	297	295	2	297	1	0	2	0	0
Mut_60	SKESA	80X	297	296	1	297	2	0	1	0	0
Mut_60	SKESA	100X	297	297	0	297	2	0	1	0	0
Mut_60	SPAdes	20X	302	297	0	297	3	0	0	5	30
Mut_60	SPAdes	40X	301	297	0	297	3	0	0	4	20
Mut_60	SPAdes	60X	301	297	0	297	3	0	0	4	17
Mut_60	SPAdes	80X	301	297	0	297	3	0	0	4	19
Mut_60	SPAdes	100X	301	297	0	297	3	0	0	4	26
Mut_61	SKESA	20X	280	231	46	277	0	4	19	3	0
Mut_61	SKESA	40X	290	282	7	289	0	0	11	1	0
Mut_61	SKESA	60X	290	289	1	290	1	0	9	0	0
Mut_61	SKESA	80X	291	290	1	291	2	0	7	0	0
Mut_61	SKESA	100X	292	292	0	292	2	0	6	0	0
Mut_61	SPAdes	20X	302	293	0	293	1	0	6	9	19
Mut_61	SPAdes	40X	296	293	0	293	0	1	6	3	27
Mut_61	SPAdes	60X	298	293	0	293	1	0	6	5	32
Mut_61	SPAdes	80X	298	293	0	293	2	0	5	5	32
Mut_61	SPAdes	100X	297	293	0	293	1	0	6	4	32
Mut_62	SKESA	20X	284	217	65	282	1	4	13	2	0
Mut_62	SKESA	40X	293	290	3	293	0	1	6	0	4
Mut_62	SKESA	60X	293	293	0	293	2	0	5	0	0
Mut_62	SKESA	80X	293	293	0	293	3	0	4	0	0
Mut_62	SKESA	100X	293	293	0	293	3	0	4	0	0
Mut_62	SPAdes	20X	302	296	0	296	1	0	3	6	40
Mut_62	SPAdes	40X	302	296	0	296	1	0	3	6	14
Mut_62	SPAdes	60X	298	296	0	296	1	0	3	2	19
Mut_62	SPAdes	80X	298	296	0	296	1	0	3	2	21
Mut_62	SPAdes	100X	298	296	0	296	1	0	3	2	21
Mut_63	SKESA	20X	274	220	52	272	1	5	22	2	0
Mut_63	SKESA	40X	286	278	8	286	2	0	12	0	4
Mut_63	SKESA	60X	286	286	0	286	3	0	11	0	0
Mut_63	SKESA	80X	286	286	0	286	3	0	11	0	0
Mut_63	SKESA	100X	286	286	0	286	3	0	11	0	0
Mut_63	SPAdes	20X	292	287	0	287	3	1	9	5	35
Mut_63	SPAdes	40X	290	287	0	287	3	1	9	3	26
Mut_63	SPAdes	60X	291	287	0	287	3	1	9	4	32
Mut_63	SPAdes	80X	292	287	0	287	4	1	8	5	25
Mut_63	SPAdes	100X	293	287	0	287	4	1	8	6	25
Mut_64	SKESA	20X	275	218	53	271	0	6	23	4	0
Mut_64	SKESA	40X	290	289	1	290	2	0	8	0	0
Mut_64	SKESA	60X	293	292	1	293	2	0	5	0	0
Mut_64	SKESA	80X	293	292	1	293	2	0	5	0	0
Mut_64	SKESA	100X	293	292	1	293	2	0	5	0	0
Mut_64	SPAdes	20X	299	295	0	295	0	1	4	4	36
Mut_64	SPAdes	40X	298	295	0	295	0	1	4	3	29
Mut_64	SPAdes	60X	298	295	0	295	0	1	4	3	29
Mut_64	SPAdes	80X	298	295	0	295	0	1	4	3	28
Mut_64	SPAdes	100X	298	295	0	295	0	1	4	3	28
Mut_65	SKESA	20X	287	215	70	285	1	4	10	2	8
Mut_65	SKESA	40X	293	292	1	293	2	0	5	0	0
Mut_65	SKESA	60X	294	294	0	294	2	0	4	0	0
Mut_65	SKESA	80X	294	294	0	294	2	0	4	0	0
Mut_65	SKESA	100X	294	294	0	294	2	0	4	0	0
Mut_65	SPAdes	20X	299	296	0	296	3	0	1	3	46
Mut_65	SPAdes	40X	299	296	0	296	3	0	1	3	17
Mut_65	SPAdes	60X	299	296	0	296	3	0	1	3	20
Mut_65	SPAdes	80X	299	296	0	296	3	0	1	3	26
Mut_65	SPAdes	100X	299	296	0	296	3	0	1	3	25
Mut_66	SKESA	20X	284	212	67	279	1	5	15	5	1
Mut_66	SKESA	40X	292	288	4	292	1	0	7	0	0
Mut_66	SKESA	60X	292	291	1	292	1	0	7	0	0
Mut_66	SKESA	80X	292	292	0	292	1	0	7	0	0
Mut_66	SKESA	100X	292	292	0	292	1	0	7	0	0
Mut_66	SPAdes	20X	299	293	0	293	1	1	5	6	33
Mut_66	SPAdes	40X	297	293	0	293	1	1	5	4	28
Mut_66	SPAdes	60X	297	293	0	293	1	2	4	4	28
Mut_66	SPAdes	80X	296	293	0	293	1	1	5	3	29
Mut_66	SPAdes	100X	296	293	0	293	1	1	5	3	25
Mut_67	SKESA	20X	279	214	60	274	2	8	16	5	0
Mut_67	SKESA	40X	290	284	6	290	2	0	8	0	0
Mut_67	SKESA	60X	290	290	0	290	2	0	8	0	0
Mut_67	SKESA	80X	291	291	0	291	2	0	7	0	0
Mut_67	SKESA	100X	291	291	0	291	2	0	7	0	0
Mut_67	SPAdes	20X	300	293	0	293	1	1	5	7	41
Mut_67	SPAdes	40X	299	293	0	293	1	1	5	6	28
Mut_67	SPAdes	60X	298	293	0	293	1	1	5	5	33
Mut_67	SPAdes	80X	297	293	0	293	1	1	5	4	34
Mut_67	SPAdes	100X	298	293	0	293	1	1	5	5	33
Mut_68	SKESA	20X	286	229	53	282	0	5	13	4	0
Mut_68	SKESA	40X	296	294	2	296	0	0	4	0	4
Mut_68	SKESA	60X	296	296	0	296	0	0	4	0	0
Mut_68	SKESA	80X	296	296	0	296	0	0	4	0	0
Mut_68	SKESA	100X	296	296	0	296	0	0	4	0	0
Mut_68	SPAdes	20X	301	296	0	296	0	0	4	5	35
Mut_68	SPAdes	40X	299	296	0	296	0	0	4	3	30
Mut_68	SPAdes	60X	299	296	0	296	0	0	4	3	28
Mut_68	SPAdes	80X	301	296	0	296	0	0	4	5	27
Mut_68	SPAdes	100X	300	296	0	296	0	0	4	4	30
Mut_69	SKESA	20X	278	221	56	277	0	5	18	1	2
Mut_69	SKESA	40X	293	292	1	293	1	0	6	0	4
Mut_69	SKESA	60X	294	294	0	294	2	0	4	0	0
Mut_69	SKESA	80X	295	295	0	295	3	0	2	0	0
Mut_69	SKESA	100X	295	295	0	295	3	0	2	0	0
Mut_69	SPAdes	20X	301	296	0	296	2	0	2	5	25
Mut_69	SPAdes	40X	302	296	0	296	2	0	2	6	22
Mut_69	SPAdes	60X	300	296	0	296	2	0	2	4	23
Mut_69	SPAdes	80X	299	296	0	296	2	0	2	3	29
Mut_69	SPAdes	100X	299	296	0	296	2	0	2	3	28
Mut_7	SKESA	20X	273	212	59	271	1	4	24	2	2
Mut_7	SKESA	40X	289	286	3	289	2	1	8	0	4
Mut_7	SKESA	60X	294	293	1	294	3	0	3	0	0
Mut_7	SKESA	80X	294	293	1	294	3	0	3	0	0
Mut_7	SKESA	100X	294	294	0	294	3	0	3	0	0
Mut_7	SPAdes	20X	300	293	0	293	3	1	3	7	33
Mut_7	SPAdes	40X	298	295	0	295	2	0	3	3	35
Mut_7	SPAdes	60X	299	294	0	294	3	1	2	5	23
Mut_7	SPAdes	80X	298	295	0	295	3	0	2	3	24
Mut_7	SPAdes	100X	300	295	0	295	3	0	2	5	17
Mut_70	SKESA	20X	282	219	60	279	1	3	17	3	1
Mut_70	SKESA	40X	294	287	6	293	1	1	5	1	4
Mut_70	SKESA	60X	296	295	1	296	1	0	3	0	0
Mut_70	SKESA	80X	296	296	0	296	1	0	3	0	0
Mut_70	SKESA	100X	296	296	0	296	1	0	3	0	0
Mut_70	SPAdes	20X	301	296	1	297	0	1	2	4	36
Mut_70	SPAdes	40X	301	297	0	297	0	1	2	4	23
Mut_70	SPAdes	60X	300	297	0	297	0	1	2	3	24
Mut_70	SPAdes	80X	300	297	0	297	0	1	2	3	29
Mut_70	SPAdes	100X	301	296	0	296	0	2	2	5	27
Mut_71	SKESA	20X	280	211	66	277	2	11	10	3	0
Mut_71	SKESA	40X	293	286	5	291	2	0	7	2	4
Mut_71	SKESA	60X	291	291	0	291	2	0	7	0	0
Mut_71	SKESA	80X	291	291	0	291	3	0	6	0	0
Mut_71	SKESA	100X	291	291	0	291	3	0	6	0	0
Mut_71	SPAdes	20X	299	293	0	293	0	1	6	6	37
Mut_71	SPAdes	40X	300	293	0	293	0	1	6	7	16
Mut_71	SPAdes	60X	298	294	0	294	0	1	5	4	31
Mut_71	SPAdes	80X	297	293	0	293	0	1	6	4	38
Mut_71	SPAdes	100X	297	293	0	293	0	1	6	4	36
Mut_72	SKESA	20X	286	220	64	284	2	2	12	2	1
Mut_72	SKESA	40X	295	288	5	293	3	0	4	2	4
Mut_72	SKESA	60X	295	295	0	295	3	0	2	0	0
Mut_72	SKESA	80X	295	295	0	295	3	0	2	0	0
Mut_72	SKESA	100X	295	295	0	295	3	0	2	0	0
Mut_72	SPAdes	20X	301	296	0	296	2	0	2	5	28
Mut_72	SPAdes	40X	301	296	0	296	2	0	2	5	19
Mut_72	SPAdes	60X	299	296	0	296	2	0	2	3	33
Mut_72	SPAdes	80X	301	296	0	296	2	0	2	5	16
Mut_72	SPAdes	100X	301	296	0	296	2	0	2	5	15
Mut_73	SKESA	20X	281	207	66	273	1	7	19	8	1
Mut_73	SKESA	40X	294	282	11	293	1	0	6	1	0
Mut_73	SKESA	60X	293	292	1	293	2	0	5	0	0
Mut_73	SKESA	80X	293	292	1	293	2	0	5	0	0
Mut_73	SKESA	100X	293	293	0	293	2	0	5	0	0
Mut_73	SPAdes	20X	303	294	0	294	0	0	6	9	28
Mut_73	SPAdes	40X	299	295	0	295	0	0	5	4	32
Mut_73	SPAdes	60X	298	295	0	295	0	0	5	3	27
Mut_73	SPAdes	80X	299	295	0	295	0	0	5	4	32
Mut_73	SPAdes	100X	298	295	0	295	0	0	5	3	32
Mut_74	SKESA	20X	281	220	58	278	2	8	12	3	1
Mut_74	SKESA	40X	292	284	7	291	3	0	6	1	0
Mut_74	SKESA	60X	292	290	2	292	3	0	5	0	0
Mut_74	SKESA	80X	293	292	1	293	3	0	4	0	0
Mut_74	SKESA	100X	293	293	0	293	3	0	4	0	0
Mut_74	SPAdes	20X	297	295	0	295	2	0	3	2	28
Mut_74	SPAdes	40X	299	295	0	295	2	0	3	4	27
Mut_74	SPAdes	60X	298	294	0	294	2	0	4	4	30
Mut_74	SPAdes	80X	299	295	0	295	2	0	3	4	27
Mut_74	SPAdes	100X	298	295	0	295	2	0	3	3	29
Mut_75	SKESA	20X	277	218	57	275	3	2	20	2	0
Mut_75	SKESA	40X	287	275	12	287	5	0	8	0	0
Mut_75	SKESA	60X	288	288	0	288	5	0	7	0	0
Mut_75	SKESA	80X	288	288	0	288	5	0	7	0	0
Mut_75	SKESA	100X	288	288	0	288	5	0	7	0	0
Mut_75	SPAdes	20X	293	292	0	292	2	1	5	1	35
Mut_75	SPAdes	40X	294	293	0	293	2	0	5	1	25
Mut_75	SPAdes	60X	295	293	0	293	2	0	5	2	30
Mut_75	SPAdes	80X	294	293	0	293	2	0	5	1	33
Mut_75	SPAdes	100X	294	293	0	293	2	0	5	1	33
Mut_76	SKESA	20X	284	223	58	281	0	3	16	3	1
Mut_76	SKESA	40X	291	287	4	291	0	0	9	0	0
Mut_76	SKESA	60X	291	291	0	291	0	0	9	0	0
Mut_76	SKESA	80X	291	291	0	291	0	0	9	0	0
Mut_76	SKESA	100X	291	291	0	291	0	0	9	0	0
Mut_76	SPAdes	20X	297	292	0	292	1	1	6	5	55
Mut_76	SPAdes	40X	295	292	0	292	1	1	6	3	26
Mut_76	SPAdes	60X	296	292	0	292	1	1	6	4	22
Mut_76	SPAdes	80X	295	292	0	292	1	1	6	3	29
Mut_76	SPAdes	100X	293	293	0	293	1	1	5	0	30
Mut_77	SKESA	20X	280	221	57	278	2	3	17	2	0
Mut_77	SKESA	40X	289	282	6	288	4	0	8	1	4
Mut_77	SKESA	60X	290	289	1	290	4	0	6	0	0
Mut_77	SKESA	80X	291	290	1	291	5	0	4	0	0
Mut_77	SKESA	100X	291	291	0	291	5	0	4	0	0
Mut_77	SPAdes	20X	299	292	0	292	4	0	4	7	28
Mut_77	SPAdes	40X	299	293	0	293	3	0	4	6	29
Mut_77	SPAdes	60X	298	294	0	294	3	1	2	4	31
Mut_77	SPAdes	80X	294	292	0	292	3	1	4	2	33
Mut_77	SPAdes	100X	292	292	0	292	3	1	4	0	32
Mut_78	SKESA	20X	285	214	69	283	0	3	14	2	1
Mut_78	SKESA	40X	297	291	5	296	0	0	4	1	0
Mut_78	SKESA	60X	296	296	0	296	0	0	4	0	0
Mut_78	SKESA	80X	296	296	0	296	0	0	4	0	0
Mut_78	SKESA	100X	296	296	0	296	0	0	4	0	0
Mut_78	SPAdes	20X	303	297	0	297	1	0	2	6	17
Mut_78	SPAdes	40X	301	297	0	297	1	0	2	4	32
Mut_78	SPAdes	60X	301	297	0	297	1	0	2	4	17
Mut_78	SPAdes	80X	301	297	0	297	1	0	2	4	27
Mut_78	SPAdes	100X	301	297	0	297	1	0	2	4	26
Mut_79	SKESA	20X	288	235	52	287	1	1	11	1	4
Mut_79	SKESA	40X	294	293	1	294	1	0	5	0	0
Mut_79	SKESA	60X	296	296	0	296	2	0	2	0	0
Mut_79	SKESA	80X	296	296	0	296	2	0	2	0	0
Mut_79	SKESA	100X	296	296	0	296	2	0	2	0	0
Mut_79	SPAdes	20X	302	298	0	298	1	0	1	4	44
Mut_79	SPAdes	40X	301	298	0	298	1	0	1	3	23
Mut_79	SPAdes	60X	302	298	0	298	1	0	1	4	29
Mut_79	SPAdes	80X	302	298	0	298	1	0	1	4	23
Mut_79	SPAdes	100X	302	298	0	298	1	0	1	4	27
Mut_8	SKESA	20X	277	226	46	272	3	6	19	5	35
Mut_8	SKESA	40X	289	285	4	289	4	1	6	0	0
Mut_8	SKESA	60X	291	291	0	291	4	0	5	0	0
Mut_8	SKESA	80X	293	293	0	293	4	0	3	0	0
Mut_8	SKESA	100X	293	293	0	293	4	0	3	0	0
Mut_8	SPAdes	20X	300	295	1	296	1	0	3	4	36
Mut_8	SPAdes	40X	302	296	0	296	1	0	3	6	20
Mut_8	SPAdes	60X	300	296	0	296	1	0	3	4	21
Mut_8	SPAdes	80X	300	296	0	296	1	0	3	4	15
Mut_8	SPAdes	100X	300	296	0	296	1	0	3	4	17
Mut_80	SKESA	20X	290	225	59	284	0	6	10	6	0
Mut_80	SKESA	40X	296	290	5	295	1	0	4	1	4
Mut_80	SKESA	60X	295	294	1	295	1	0	4	0	0
Mut_80	SKESA	80X	295	295	0	295	1	0	4	0	0
Mut_80	SKESA	100X	295	295	0	295	1	0	4	0	0
Mut_80	SPAdes	20X	300	296	0	296	1	0	3	4	36
Mut_80	SPAdes	40X	300	296	0	296	0	0	4	4	29
Mut_80	SPAdes	60X	299	296	0	296	0	0	4	3	26
Mut_80	SPAdes	80X	299	296	0	296	0	0	4	3	28
Mut_80	SPAdes	100X	300	296	0	296	0	0	4	4	28
Mut_81	SKESA	20X	278	206	71	277	1	2	20	1	2
Mut_81	SKESA	40X	292	281	8	289	1	0	10	3	0
Mut_81	SKESA	60X	290	290	0	290	1	1	8	0	0
Mut_81	SKESA	80X	291	291	0	291	1	0	8	0	0
Mut_81	SKESA	100X	291	291	0	291	2	0	7	0	0
Mut_81	SPAdes	20X	295	291	0	291	3	0	6	4	25
Mut_81	SPAdes	40X	295	291	0	291	4	0	5	4	28
Mut_81	SPAdes	60X	296	291	0	291	4	0	5	5	21
Mut_81	SPAdes	80X	294	291	0	291	4	0	5	3	14
Mut_81	SPAdes	100X	294	291	0	291	3	0	6	3	18
Mut_82	SKESA	20X	282	210	71	281	0	7	12	1	0
Mut_82	SKESA	40X	293	289	4	293	1	0	6	0	0
Mut_82	SKESA	60X	293	291	2	293	1	0	6	0	0
Mut_82	SKESA	80X	293	291	2	293	1	0	6	0	0
Mut_82	SKESA	100X	293	293	0	293	1	0	6	0	0
Mut_82	SPAdes	20X	300	295	0	295	0	0	5	5	31
Mut_82	SPAdes	40X	299	295	0	295	0	0	5	4	15
Mut_82	SPAdes	60X	300	295	0	295	1	0	4	5	16
Mut_82	SPAdes	80X	297	294	0	294	0	1	5	3	25
Mut_82	SPAdes	100X	300	295	0	295	1	0	4	5	24
Mut_83	SKESA	20X	284	224	56	280	2	4	14	4	0
Mut_83	SKESA	40X	292	285	7	292	2	0	6	0	4
Mut_83	SKESA	60X	292	291	1	292	3	0	5	0	0
Mut_83	SKESA	80X	292	292	0	292	4	0	4	0	0
Mut_83	SKESA	100X	292	292	0	292	4	0	4	0	0
Mut_83	SPAdes	20X	296	292	0	292	2	2	4	4	25
Mut_83	SPAdes	40X	301	294	0	294	2	0	4	7	19
Mut_83	SPAdes	60X	300	296	0	296	2	0	2	4	23
Mut_83	SPAdes	80X	297	293	0	293	2	1	4	4	29
Mut_83	SPAdes	100X	296	293	0	293	2	1	4	3	29
Mut_84	SKESA	20X	284	219	63	282	2	5	11	2	2
Mut_84	SKESA	40X	294	285	8	293	2	1	4	1	0
Mut_84	SKESA	60X	294	293	1	294	2	0	4	0	0
Mut_84	SKESA	80X	294	294	0	294	2	0	4	0	0
Mut_84	SKESA	100X	295	295	0	295	2	0	3	0	0
Mut_84	SPAdes	20X	301	295	0	295	1	1	3	6	34
Mut_84	SPAdes	40X	300	296	0	296	1	0	3	4	26
Mut_84	SPAdes	60X	300	296	0	296	1	0	3	4	27
Mut_84	SPAdes	80X	300	296	0	296	1	0	3	4	24
Mut_84	SPAdes	100X	303	296	0	296	1	0	3	7	38
Mut_85	SKESA	20X	287	220	63	283	1	5	11	4	1
Mut_85	SKESA	40X	295	288	6	294	1	1	4	1	0
Mut_85	SKESA	60X	297	296	1	297	1	0	2	0	0
Mut_85	SKESA	80X	297	296	1	297	1	0	2	0	0
Mut_85	SKESA	100X	297	297	0	297	1	0	2	0	0
Mut_85	SPAdes	20X	302	297	0	297	1	0	2	5	19
Mut_85	SPAdes	40X	297	296	0	296	1	1	2	1	33
Mut_85	SPAdes	60X	297	296	0	296	1	1	2	1	34
Mut_85	SPAdes	80X	297	296	0	296	1	1	2	1	29
Mut_85	SPAdes	100X	296	296	0	296	1	1	2	0	32
Mut_86	SKESA	20X	282	228	52	280	0	2	18	2	0
Mut_86	SKESA	40X	289	281	8	289	0	0	11	0	4
Mut_86	SKESA	60X	289	289	0	289	0	0	11	0	0
Mut_86	SKESA	80X	289	289	0	289	0	0	11	0	0
Mut_86	SKESA	100X	290	290	0	290	0	0	10	0	0
Mut_86	SPAdes	20X	295	289	0	289	1	1	9	6	48
Mut_86	SPAdes	40X	294	290	0	290	1	0	9	4	26
Mut_86	SPAdes	60X	295	290	0	290	1	1	8	5	34
Mut_86	SPAdes	80X	293	290	0	290	1	1	8	3	22
Mut_86	SPAdes	100X	296	291	0	291	1	0	8	5	20
Mut_87	SKESA	20X	284	225	54	279	2	5	14	5	2
Mut_87	SKESA	40X	290	281	9	290	2	0	8	0	0
Mut_87	SKESA	60X	292	291	1	292	2	0	6	0	0
Mut_87	SKESA	80X	292	291	1	292	2	0	6	0	0
Mut_87	SKESA	100X	292	292	0	292	2	0	6	0	0
Mut_87	SPAdes	20X	296	295	0	295	0	0	5	1	34
Mut_87	SPAdes	40X	296	295	0	295	1	0	4	1	27
Mut_87	SPAdes	60X	296	295	0	295	0	0	5	1	36
Mut_87	SPAdes	80X	296	295	0	295	0	0	5	1	30
Mut_87	SPAdes	100X	295	295	0	295	0	0	5	0	31
Mut_88	SKESA	20X	282	219	58	277	0	4	19	5	1
Mut_88	SKESA	40X	293	291	2	293	0	0	7	0	0
Mut_88	SKESA	60X	294	293	1	294	0	0	6	0	0
Mut_88	SKESA	80X	294	294	0	294	0	0	6	0	0
Mut_88	SKESA	100X	294	294	0	294	1	0	5	0	0
Mut_88	SPAdes	20X	297	293	0	293	0	2	5	4	37
Mut_88	SPAdes	40X	298	294	0	294	0	0	6	4	34
Mut_88	SPAdes	60X	298	294	0	294	0	0	6	4	31
Mut_88	SPAdes	80X	298	294	0	294	0	0	6	4	23
Mut_88	SPAdes	100X	298	294	0	294	0	0	6	4	31
Mut_89	SKESA	20X	291	217	70	287	1	3	9	4	2
Mut_89	SKESA	40X	295	287	8	295	1	0	4	0	4
Mut_89	SKESA	60X	295	294	1	295	1	0	4	0	0
Mut_89	SKESA	80X	295	294	1	295	1	0	4	0	0
Mut_89	SKESA	100X	295	295	0	295	1	0	4	0	0
Mut_89	SPAdes	20X	295	294	0	294	0	3	3	1	25
Mut_89	SPAdes	40X	297	293	1	294	0	3	3	3	26
Mut_89	SPAdes	60X	299	295	1	296	0	1	3	3	23
Mut_89	SPAdes	80X	298	294	1	295	0	2	3	3	21
Mut_89	SPAdes	100X	299	295	1	296	0	1	3	3	23
Mut_9	SKESA	20X	282	230	49	279	1	4	16	3	0
Mut_9	SKESA	40X	292	286	5	291	1	1	7	1	0
Mut_9	SKESA	60X	293	293	0	293	1	0	6	0	0
Mut_9	SKESA	80X	293	293	0	293	1	0	6	0	0
Mut_9	SKESA	100X	293	293	0	293	1	0	6	0	0
Mut_9	SPAdes	20X	297	294	0	294	2	1	3	3	31
Mut_9	SPAdes	40X	296	295	0	295	2	0	3	1	32
Mut_9	SPAdes	60X	296	295	0	295	2	0	3	1	27
Mut_9	SPAdes	80X	297	295	0	295	2	0	3	2	32
Mut_9	SPAdes	100X	297	295	0	295	2	0	3	2	29
Mut_90	SKESA	20X	284	217	64	281	0	9	10	3	1
Mut_90	SKESA	40X	298	294	3	297	0	1	2	1	0
Mut_90	SKESA	60X	298	298	0	298	0	0	2	0	0
Mut_90	SKESA	80X	298	298	0	298	0	0	2	0	0
Mut_90	SKESA	100X	298	298	0	298	0	0	2	0	0
Mut_90	SPAdes	20X	303	299	0	299	1	0	0	4	28
Mut_90	SPAdes	40X	302	299	0	299	1	0	0	3	31
Mut_90	SPAdes	60X	304	299	0	299	1	0	0	5	22
Mut_90	SPAdes	80X	302	299	0	299	1	0	0	3	19
Mut_90	SPAdes	100X	302	299	0	299	1	0	0	3	28
Mut_91	SKESA	20X	276	223	50	273	2	5	20	3	0
Mut_91	SKESA	40X	287	281	6	287	2	0	11	0	0
Mut_91	SKESA	60X	287	287	0	287	3	0	10	0	0
Mut_91	SKESA	80X	288	288	0	288	3	0	9	0	0
Mut_91	SKESA	100X	288	288	0	288	3	0	9	0	0
Mut_91	SPAdes	20X	289	289	0	289	5	0	6	0	34
Mut_91	SPAdes	40X	294	289	0	289	4	2	5	5	17
Mut_91	SPAdes	60X	294	289	0	289	4	2	5	5	29
Mut_91	SPAdes	80X	294	289	0	289	4	2	5	5	29
Mut_91	SPAdes	100X	292	288	0	288	4	1	7	4	20
Mut_92	SKESA	20X	280	219	59	278	1	7	14	2	3
Mut_92	SKESA	40X	296	282	13	295	2	0	3	1	0
Mut_92	SKESA	60X	295	293	2	295	2	0	3	0	0
Mut_92	SKESA	80X	296	295	1	296	2	0	2	0	0
Mut_92	SKESA	100X	296	296	0	296	2	0	2	0	0
Mut_92	SPAdes	20X	302	297	0	297	1	0	2	5	16
Mut_92	SPAdes	40X	300	297	0	297	1	0	2	3	36
Mut_92	SPAdes	60X	302	297	0	297	1	0	2	5	23
Mut_92	SPAdes	80X	302	297	0	297	1	0	2	5	15
Mut_92	SPAdes	100X	301	297	0	297	1	0	2	4	15
Mut_93	SKESA	20X	287	221	63	284	0	4	12	3	0
Mut_93	SKESA	40X	295	292	3	295	1	0	4	0	0
Mut_93	SKESA	60X	295	295	0	295	2	0	3	0	0
Mut_93	SKESA	80X	295	295	0	295	2	0	3	0	0
Mut_93	SKESA	100X	295	295	0	295	2	0	3	0	0
Mut_93	SPAdes	20X	302	297	0	297	1	0	2	5	45
Mut_93	SPAdes	40X	300	296	0	296	1	1	2	4	26
Mut_93	SPAdes	60X	300	296	0	296	1	1	2	4	28
Mut_93	SPAdes	80X	300	296	0	296	1	1	2	4	30
Mut_93	SPAdes	100X	299	296	0	296	1	1	2	3	28
Mut_94	SKESA	20X	281	212	66	278	1	7	14	3	2
Mut_94	SKESA	40X	294	287	7	294	1	0	5	0	4
Mut_94	SKESA	60X	294	294	0	294	1	0	5	0	0
Mut_94	SKESA	80X	294	294	0	294	1	0	5	0	0
Mut_94	SKESA	100X	294	294	0	294	1	0	5	0	0
Mut_94	SPAdes	20X	295	295	0	295	1	0	4	0	41
Mut_94	SPAdes	40X	295	295	0	295	1	1	3	0	36
Mut_94	SPAdes	60X	296	295	0	295	1	1	3	1	37
Mut_94	SPAdes	80X	299	295	0	295	0	2	3	4	23
Mut_94	SPAdes	100X	295	295	0	295	1	1	3	0	27
Mut_95	SKESA	20X	288	228	56	284	1	1	14	4	1
Mut_95	SKESA	40X	292	288	4	292	1	0	7	0	0
Mut_95	SKESA	60X	294	294	0	294	1	0	5	0	0
Mut_95	SKESA	80X	294	294	0	294	1	0	5	0	0
Mut_95	SKESA	100X	294	294	0	294	1	0	5	0	0
Mut_95	SPAdes	20X	302	295	0	295	0	0	5	7	44
Mut_95	SPAdes	40X	294	294	0	294	0	1	5	0	28
Mut_95	SPAdes	60X	298	294	0	294	0	1	5	4	20
Mut_95	SPAdes	80X	294	294	0	294	0	1	5	0	32
Mut_95	SPAdes	100X	295	294	0	294	0	1	5	1	33
Mut_96	SKESA	20X	281	231	50	281	2	4	13	0	2
Mut_96	SKESA	40X	291	285	6	291	2	2	5	0	4
Mut_96	SKESA	60X	294	293	1	294	3	0	3	0	0
Mut_96	SKESA	80X	294	294	0	294	3	0	3	0	0
Mut_96	SKESA	100X	294	294	0	294	3	0	3	0	0
Mut_96	SPAdes	20X	301	297	0	297	1	0	2	4	32
Mut_96	SPAdes	40X	298	297	0	297	1	0	2	1	27
Mut_96	SPAdes	60X	299	295	0	295	1	1	3	4	27
Mut_96	SPAdes	80X	297	296	0	296	1	1	2	1	31
Mut_96	SPAdes	100X	297	296	0	296	1	1	2	1	31
Mut_97	SKESA	20X	279	221	55	276	3	4	17	3	1
Mut_97	SKESA	40X	289	281	8	289	3	1	7	0	0
Mut_97	SKESA	60X	289	287	2	289	4	1	6	0	0
Mut_97	SKESA	80X	289	288	1	289	4	1	6	0	0
Mut_97	SKESA	100X	289	289	0	289	5	0	6	0	0
Mut_97	SPAdes	20X	290	289	0	289	4	1	6	1	28
Mut_97	SPAdes	40X	289	289	0	289	3	2	6	0	26
Mut_97	SPAdes	60X	289	289	0	289	4	1	6	0	34
Mut_97	SPAdes	80X	289	289	0	289	4	1	6	0	37
Mut_97	SPAdes	100X	289	289	0	289	3	2	6	0	46
Mut_98	SKESA	20X	279	225	51	276	1	8	15	3	0
Mut_98	SKESA	40X	289	286	2	288	1	1	10	1	4
Mut_98	SKESA	60X	289	289	0	289	2	0	9	0	0
Mut_98	SKESA	80X	289	289	0	289	2	0	9	0	0
Mut_98	SKESA	100X	289	289	0	289	2	0	9	0	0
Mut_98	SPAdes	20X	297	291	0	291	0	1	8	6	27
Mut_98	SPAdes	40X	296	291	0	291	0	1	8	5	24
Mut_98	SPAdes	60X	294	291	0	291	0	1	8	3	33
Mut_98	SPAdes	80X	293	290	0	290	0	3	7	3	26
Mut_98	SPAdes	100X	293	290	0	290	0	3	7	3	26
Mut_99	SKESA	20X	279	226	51	277	1	6	16	2	1
Mut_99	SKESA	40X	292	285	7	292	1	0	7	0	4
Mut_99	SKESA	60X	292	291	1	292	2	0	6	0	0
Mut_99	SKESA	80X	292	292	0	292	2	0	6	0	0
Mut_99	SKESA	100X	292	292	0	292	2	0	6	0	0
Mut_99	SPAdes	20X	298	293	0	293	1	0	6	5	38
Mut_99	SPAdes	40X	297	293	0	293	1	0	6	4	29
Mut_99	SPAdes	60X	297	294	0	294	1	0	5	3	40
Mut_99	SPAdes	80X	297	293	0	293	1	0	6	4	39
Mut_99	SPAdes	100X	297	293	0	293	1	0	6	4	32

## Sheet: Table S7
		Assembly statistics, CSP1 read mapping statistics, and CSP2 coverage statistics
Species	Measurement	Q25	Q50	Q75	Outlier
E. coli	Contig Count	283	394	522	880
Listeria	Contig Count	32	51	97	194
Salmonella	Contig Count	73	119	194	376
E. coli	N50	34300	77506	110600	-80150
Listeria	N50	124786	237903	359803	-227741
Salmonella	N50	69133	110744	181925	-100055
E. coli	Pileup Depth	42.5	56.2	77.6	-10.2
Listeria	Pileup Depth	55.1	82	118	-38.6
Salmonella	Pileup Depth	48.8	64.2	83.8	-3.65
E. coli	Read Mapping Rate	92	94.4	95.7	86.3
Listeria	Read Mapping Rate	96.1	97.6	98.6	92.3
Salmonella	Read Mapping Rate	95	97.1	98.2	90.3
E. coli	Reference Genome Coverage	96.8	97.9	98.7	93.9
Listeria	Reference Genome Coverage	98.3	99.3	99.8	96
Salmonella	Reference Genome Coverage	98.6	99.2	99.7	97
E. coli	Query Genome Coverage	97	98.1	98.9	94.1
Listeria	Query Genome Coverage	97.8	98.6	99.8	94.7
Salmonella	Query Genome Coverage	98.3	99.3	99.8	96.1

## Sheet: Table_S8
		Slope, correlation, and mean SNP differences for each cluster and method comparison
Species	Analysis_ID	Method_Comparison	Slope	Correlation	Mean_Difference	Lower_95CI	Upper_95CI	CI_Range
Ecoli	Ec_PDS000000709.70	CSP1_v_CSP2	0.951372	0.994752	-1.28709	-4.907	2.333	7.24
Ecoli	Ec_PDS000000709.70	NCBI_v_CSP1	1.10968	0.987059	4.19052	-2.495	10.876	13.371
Ecoli	Ec_PDS000000709.70	NCBI_v_CSP2	1.06201	0.987731	2.90342	-3.026	8.833	11.859
Ecoli	Ec_PDS000000712.113	CSP1_v_CSP2	1.01691	0.987164	0.902867	-3.516	5.322	8.838
Ecoli	Ec_PDS000000712.113	NCBI_v_CSP1	0.957995	0.977788	0.304341	-5.465	6.073	11.538
Ecoli	Ec_PDS000000712.113	NCBI_v_CSP2	0.985472	0.976408	1.20721	-4.629	7.043	11.672
Ecoli	Ec_PDS000000812.66	CSP1_v_CSP2	0.986747	0.996091	-0.404938	-4.143	3.333	7.476
Ecoli	Ec_PDS000000812.66	NCBI_v_CSP1	1.057	0.993426	3.46173	-2.165	9.088	11.253
Ecoli	Ec_PDS000000812.66	NCBI_v_CSP2	1.04433	0.990812	3.05679	-3.248	9.362	12.61
Ecoli	Ec_PDS000001063.100	CSP1_v_CSP2	0.951507	0.982966	-0.676375	-4.417	3.065	7.482
Ecoli	Ec_PDS000001063.100	NCBI_v_CSP1	1.03942	0.963403	3.10432	-2.628	8.836	11.464
Ecoli	Ec_PDS000001063.100	NCBI_v_CSP2	1.00912	0.966249	2.42795	-3.033	7.889	10.922
Ecoli	Ec_PDS000003443.105	CSP1_v_CSP2	0.975101	0.994782	-0.486863	-2.668	1.694	4.362
Ecoli	Ec_PDS000003443.105	NCBI_v_CSP1	1.10865	0.984293	3.71575	-0.984	8.416	9.4
Ecoli	Ec_PDS000003443.105	NCBI_v_CSP2	1.08449	0.982275	3.22888	-1.501	7.959	9.46
Ecoli	Ec_PDS000003657.110	CSP1_v_CSP2	0.966206	0.992939	-1.13111	-5.008	2.746	7.754
Ecoli	Ec_PDS000003657.110	NCBI_v_CSP1	1.06512	0.990704	2.6297	-2.392	7.651	10.043
Ecoli	Ec_PDS000003657.110	NCBI_v_CSP2	1.03839	0.992559	1.49859	-2.79	5.787	8.577
Ecoli	Ec_PDS000004313.94	CSP1_v_CSP2	0.989987	0.995802	-0.270386	-3.303	2.762	6.065
Ecoli	Ec_PDS000004313.94	NCBI_v_CSP1	0.993263	0.992009	0.733884	-3.432	4.9	8.332
Ecoli	Ec_PDS000004313.94	NCBI_v_CSP2	0.988856	0.993409	0.463499	-3.334	4.261	7.595
Ecoli	Ec_PDS000004902.66	CSP1_v_CSP2	0.987092	0.982579	0.34955	-4.026	4.725	8.751
Ecoli	Ec_PDS000004902.66	NCBI_v_CSP1	1.1268	0.974789	4.30234	-2.449	11.053	13.502
Ecoli	Ec_PDS000004902.66	NCBI_v_CSP2	1.12881	0.972063	4.65189	-2.397	11.701	14.098
Ecoli	Ec_PDS000006247.21	CSP1_v_CSP2	1.0408	0.998222	0.0879808	-2.698	2.874	5.572
Ecoli	Ec_PDS000006247.21	NCBI_v_CSP1	1.03131	0.993537	0.6875	-4.076	5.451	9.527
Ecoli	Ec_PDS000006247.21	NCBI_v_CSP2	1.07604	0.994218	0.775481	-4.429	5.98	10.409
Ecoli	Ec_PDS000008627.62	CSP1_v_CSP2	0.980969	0.991308	0.15959	-3.662	3.981	7.643
Ecoli	Ec_PDS000008627.62	NCBI_v_CSP1	1.11339	0.989564	5.01475	-0.672	10.702	11.374
Ecoli	Ec_PDS000008627.62	NCBI_v_CSP2	1.10002	0.987986	5.17435	-0.607	10.956	11.563
Ecoli	Ec_PDS000014781.44	CSP1_v_CSP2	0.866515	0.975866	-0.896937	-3.964	2.17	6.134
Ecoli	Ec_PDS000014781.44	NCBI_v_CSP1	1.09516	0.954492	1.25946	-2.85	5.369	8.219
Ecoli	Ec_PDS000014781.44	NCBI_v_CSP2	0.981487	0.963368	0.362523	-3.206	3.931	7.137
Ecoli	Ec_PDS000015906.68	CSP1_v_CSP2	0.985099	0.997182	-0.542237	-2.868	1.784	4.652
Ecoli	Ec_PDS000015906.68	NCBI_v_CSP1	1.08465	0.98561	3.85845	-2.354	10.071	12.425
Ecoli	Ec_PDS000015906.68	NCBI_v_CSP2	1.07334	0.98729	3.31621	-2.459	9.092	11.551
Ecoli	Ec_PDS000016929.61	CSP1_v_CSP2	0.988741	0.974737	0.201452	-5.316	5.719	11.035
Ecoli	Ec_PDS000016929.61	NCBI_v_CSP1	0.881351	0.924562	-1.07804	-10.505	8.349	18.854
Ecoli	Ec_PDS000016929.61	NCBI_v_CSP2	0.92739	0.959079	-0.876588	-7.766	6.012	13.778
Ecoli	Ec_PDS000019298.60	CSP1_v_CSP2	1.11312	0.980594	0.459119	-6.699	7.617	14.316
Ecoli	Ec_PDS000019298.60	NCBI_v_CSP1	0.753068	0.928235	0.593291	-12.098	13.284	25.382
Ecoli	Ec_PDS000019298.60	NCBI_v_CSP2	0.886541	0.962652	1.05241	-6.802	8.906	15.708
Ecoli	Ec_PDS000020148.18	CSP1_v_CSP2	1.0431	0.998273	0.293785	-2.889	3.477	6.366
Ecoli	Ec_PDS000020148.18	NCBI_v_CSP1	0.943065	0.993111	-0.508475	-6.05	5.033	11.083
Ecoli	Ec_PDS000020148.18	NCBI_v_CSP2	0.985162	0.992856	-0.214689	-5.278	4.848	10.126
Ecoli	Ec_PDS000033695.60	CSP1_v_CSP2	0.950567	0.987886	-2	-7.001	3.001	10.002
Ecoli	Ec_PDS000033695.60	NCBI_v_CSP1	1.0228	0.988032	3.52025	-1.415	8.455	9.87
Ecoli	Ec_PDS000033695.60	NCBI_v_CSP2	0.978757	0.982603	1.52025	-4.401	7.441	11.842
Ecoli	Ec_PDS000034262.79	CSP1_v_CSP2	0.984666	0.989094	-0.839208	-5.382	3.704	9.086
Ecoli	Ec_PDS000034262.79	NCBI_v_CSP1	1.00808	0.983252	3.09112	-2.646	8.828	11.474
Ecoli	Ec_PDS000034262.79	NCBI_v_CSP2	1.00416	0.983836	2.25191	-3.382	7.885	11.267
Ecoli	Ec_PDS000034684.64	CSP1_v_CSP2	1.03684	0.991999	1.48523	-3.137	6.107	9.244
Ecoli	Ec_PDS000034684.64	NCBI_v_CSP1	0.976768	0.989887	-0.0473748	-5.051	4.956	10.007
Ecoli	Ec_PDS000034684.64	NCBI_v_CSP2	1.02535	0.994183	1.43785	-2.406	5.282	7.688
Ecoli	Ec_PDS000034895.32	CSP1_v_CSP2	1.01776	0.996965	0.580782	-2.038	3.2	5.238
Ecoli	Ec_PDS000034895.32	NCBI_v_CSP1	1.04924	0.986966	2.79082	-3.054	8.636	11.69
Ecoli	Ec_PDS000034895.32	NCBI_v_CSP2	1.06837	0.984431	3.3716	-3.146	9.889	13.035
Ecoli	Ec_PDS000034922.19	CSP1_v_CSP2	1.0409	0.978834	0.777959	-4.072	5.628	9.7
Ecoli	Ec_PDS000034922.19	NCBI_v_CSP1	0.971011	0.971784	0.905306	-4.626	6.436	11.062
Ecoli	Ec_PDS000034922.19	NCBI_v_CSP2	1.02639	0.965956	1.68327	-4.365	7.732	12.097
Ecoli	Ec_PDS000034994.38	CSP1_v_CSP2	1.0132	0.996204	0.36898	-2.443	3.181	5.624
Ecoli	Ec_PDS000034994.38	NCBI_v_CSP1	1.00895	0.98995	2.60082	-2.013	7.214	9.227
Ecoli	Ec_PDS000034994.38	NCBI_v_CSP2	1.02373	0.987594	2.9698	-2.197	8.137	10.334
Ecoli	Ec_PDS000035041.62	CSP1_v_CSP2	1.00895	0.997297	0.16168	-2.951	3.275	6.226
Ecoli	Ec_PDS000035041.62	NCBI_v_CSP1	1.01261	0.996127	1.10441	-2.693	4.901	7.594
Ecoli	Ec_PDS000035041.62	NCBI_v_CSP2	1.02501	0.996687	1.26609	-2.364	4.896	7.26
Ecoli	Ec_PDS000035111.83	CSP1_v_CSP2	0.981705	0.989582	-0.508333	-5.621	4.604	10.225
Ecoli	Ec_PDS000035111.83	NCBI_v_CSP1	0.977897	0.97444	2.73969	-5.24	10.719	15.959
Ecoli	Ec_PDS000035111.83	NCBI_v_CSP2	0.977763	0.982125	2.23136	-4.469	8.932	13.401
Ecoli	Ec_PDS000035212.40	CSP1_v_CSP2	0.943593	0.985766	-0.231383	-5.702	5.239	10.941
Ecoli	Ec_PDS000035212.40	NCBI_v_CSP1	0.934137	0.981868	1.70479	-4.191	7.6	11.791
Ecoli	Ec_PDS000035212.40	NCBI_v_CSP2	0.893663	0.981308	1.4734	-5.102	8.049	13.151
Ecoli	Ec_PDS000035426.65	CSP1_v_CSP2	0.991645	0.982075	0.0328218	-4.098	4.164	8.262
Ecoli	Ec_PDS000035426.65	NCBI_v_CSP1	1.00181	0.981952	1.41645	-2.809	5.642	8.451
Ecoli	Ec_PDS000035426.65	NCBI_v_CSP2	1.01357	0.983898	1.44928	-2.554	5.453	8.007
Ecoli	Ec_PDS000035737.71	CSP1_v_CSP2	1.00559	0.991369	0.689782	-2.707	4.087	6.794
Ecoli	Ec_PDS000035737.71	NCBI_v_CSP1	1.03759	0.980853	2.18794	-3.234	7.609	10.843
Ecoli	Ec_PDS000035737.71	NCBI_v_CSP2	1.05441	0.982652	2.87772	-2.388	8.143	10.531
Ecoli	Ec_PDS000037269.53	CSP1_v_CSP2	0.986795	0.997685	-0.0344633	-2.27	2.201	4.471
Ecoli	Ec_PDS000037269.53	NCBI_v_CSP1	1.03222	0.991127	3.30395	-1.28	7.888	9.168
Ecoli	Ec_PDS000037269.53	NCBI_v_CSP2	1.02078	0.990958	3.26949	-1.288	7.827	9.115
Ecoli	Ec_PDS000046770.28	CSP1_v_CSP2	0.977089	0.995298	-0.54902	-4.233	3.135	7.368
Ecoli	Ec_PDS000046770.28	NCBI_v_CSP1	1.00945	0.987581	2.30902	-3.639	8.257	11.896
Ecoli	Ec_PDS000046770.28	NCBI_v_CSP2	0.993572	0.990167	1.76	-3.533	7.053	10.586
Ecoli	Ec_PDS000047062.10	CSP1_v_CSP2	0.976901	0.998614	-0.233083	-1.36	0.894	2.254
Ecoli	Ec_PDS000047062.10	NCBI_v_CSP1	1.0759	0.998376	0.672306	-1.234	2.579	3.813
Ecoli	Ec_PDS000047062.10	NCBI_v_CSP2	1.05295	0.99879	0.439223	-1.04	1.919	2.959
Ecoli	Ec_PDS000047857.31	CSP1_v_CSP2	1.01038	0.998951	-0.158431	-1.18	0.863	2.043
Ecoli	Ec_PDS000047857.31	NCBI_v_CSP1	1.03447	0.98894	1.61725	-1.842	5.077	6.919
Ecoli	Ec_PDS000047857.31	NCBI_v_CSP2	1.04742	0.989996	1.45882	-1.912	4.83	6.742
Ecoli	Ec_PDS000052522.61	CSP1_v_CSP2	0.965286	0.969824	-2.57507	-9.033	3.883	12.916
Ecoli	Ec_PDS000052522.61	NCBI_v_CSP1	0.814963	0.912772	-1.06904	-11.792	9.654	21.446
Ecoli	Ec_PDS000052522.61	NCBI_v_CSP2	0.841594	0.947031	-3.64411	-12.243	4.955	17.198
Ecoli	Ec_PDS000053788.25	CSP1_v_CSP2	0.957494	0.988861	-0.672546	-4.369	3.024	7.393
Ecoli	Ec_PDS000053788.25	NCBI_v_CSP1	0.99747	0.982236	0.915423	-3.625	5.456	9.081
Ecoli	Ec_PDS000053788.25	NCBI_v_CSP2	0.973842	0.990385	0.242877	-3.165	3.651	6.816
Ecoli	Ec_PDS000057981.20	CSP1_v_CSP2	1.01175	0.995916	0.106955	-2.58	2.794	5.374
Ecoli	Ec_PDS000057981.20	NCBI_v_CSP1	1.03176	0.995768	1.66277	-1.3	4.626	5.926
Ecoli	Ec_PDS000057981.20	NCBI_v_CSP2	1.04868	0.996253	1.76973	-1.23	4.769	5.999
Ecoli	Ec_PDS000061297.20	CSP1_v_CSP2	0.963333	0.992246	-1.52586	-5.641	2.59	8.231
Ecoli	Ec_PDS000061297.20	NCBI_v_CSP1	1.01829	0.991256	1.59447	-2.739	5.928	8.667
Ecoli	Ec_PDS000061297.20	NCBI_v_CSP2	0.983624	0.986248	0.0686124	-5.337	5.474	10.811
Ecoli	Ec_PDS000061899.27	CSP1_v_CSP2	1.02049	0.991475	1.0474	-2.33	4.425	6.755
Ecoli	Ec_PDS000061899.27	NCBI_v_CSP1	1.05054	0.983685	2.70779	-2.382	7.798	10.18
Ecoli	Ec_PDS000061899.27	NCBI_v_CSP2	1.0842	0.986338	3.75519	-1.216	8.726	9.942
Ecoli	Ec_PDS000061924.6	CSP1_v_CSP2	0.991537	0.994176	0.549899	-2.032	3.132	5.164
Ecoli	Ec_PDS000061924.6	NCBI_v_CSP1	1.08988	0.984579	2.42364	-2.676	7.524	10.2
Ecoli	Ec_PDS000061924.6	NCBI_v_CSP2	1.08877	0.986194	2.97354	-1.894	7.841	9.735
Ecoli	Ec_PDS000062070.17	CSP1_v_CSP2	1.00466	0.992179	0.432496	-2.564	3.429	5.993
Ecoli	Ec_PDS000062070.17	NCBI_v_CSP1	1.04397	0.991394	2.10754	-1.363	5.578	6.941
Ecoli	Ec_PDS000062070.17	NCBI_v_CSP2	1.05477	0.989209	2.54004	-1.381	6.461	7.842
Ecoli	Ec_PDS000062095.20	CSP1_v_CSP2	0.985821	0.994272	-1.04751	-3.996	1.901	5.897
Ecoli	Ec_PDS000062095.20	NCBI_v_CSP1	1.13038	0.979163	6.64103	-0.693	13.975	14.668
Ecoli	Ec_PDS000062095.20	NCBI_v_CSP2	1.11905	0.97766	5.59351	-1.808	12.995	14.803
Ecoli	Ec_PDS000062098.21	CSP1_v_CSP2	1.01728	0.992568	-0.0289562	-4.505	4.447	8.952
Ecoli	Ec_PDS000062098.21	NCBI_v_CSP1	0.984177	0.983828	2.7798	-3.774	9.334	13.108
Ecoli	Ec_PDS000062098.21	NCBI_v_CSP2	1.00992	0.98504	2.75084	-3.54	9.042	12.582
Ecoli	Ec_PDS000070064.71	CSP1_v_CSP2	0.983988	0.99714	-0.282883	-2.599	2.033	4.632
Ecoli	Ec_PDS000070064.71	NCBI_v_CSP1	0.99576	0.99483	0.108829	-2.939	3.157	6.096
Ecoli	Ec_PDS000070064.71	NCBI_v_CSP2	0.983736	0.995953	-0.174054	-2.914	2.566	5.48
Ecoli	Ec_PDS000071644.20	CSP1_v_CSP2	1.00686	0.992593	0.199098	-4.296	4.694	8.99
Ecoli	Ec_PDS000071644.20	NCBI_v_CSP1	0.974642	0.980694	1.5436	-5.697	8.785	14.482
Ecoli	Ec_PDS000071644.20	NCBI_v_CSP2	0.991251	0.983274	1.7427	-4.952	8.438	13.39
Ecoli	Ec_PDS000072635.46	CSP1_v_CSP2	1.081	0.986331	1.6582	-4.248	7.565	11.813
Ecoli	Ec_PDS000072635.46	NCBI_v_CSP1	0.710922	0.927766	-3.8701	-17.169	9.429	26.598
Ecoli	Ec_PDS000072635.46	NCBI_v_CSP2	0.806347	0.960146	-2.2119	-11.293	6.869	18.162
Ecoli	Ec_PDS000080828.3	CSP1_v_CSP2	0.98624	0.995412	-0.394148	-2.851	2.062	4.913
Ecoli	Ec_PDS000080828.3	NCBI_v_CSP1	1.08901	0.983425	4.70511	-0.875	10.285	11.16
Ecoli	Ec_PDS000080828.3	NCBI_v_CSP2	1.08159	0.985809	4.31096	-0.855	9.477	10.332
Ecoli	Ec_PDS000090208.57	CSP1_v_CSP2	1.02759	0.994418	0.295679	-2.897	3.488	6.385
Ecoli	Ec_PDS000090208.57	NCBI_v_CSP1	0.969305	0.993301	-0.316358	-3.745	3.112	6.857
Ecoli	Ec_PDS000090208.57	NCBI_v_CSP2	0.997233	0.988934	-0.020679	-4.268	4.227	8.495
Ecoli	Ec_PDS000120861.4	CSP1_v_CSP2	1.03601	0.990912	0.997449	-3.177	5.171	8.348
Ecoli	Ec_PDS000120861.4	NCBI_v_CSP1	0.856736	0.960765	1.09439	-7.498	9.686	17.184
Ecoli	Ec_PDS000120861.4	NCBI_v_CSP2	0.888886	0.953428	2.09184	-6.601	10.785	17.386
Ecoli	Ec_PDS000122693.8	CSP1_v_CSP2	1.01161	0.990566	-0.630824	-4.335	3.074	7.409
Ecoli	Ec_PDS000122693.8	NCBI_v_CSP1	1.025	0.977754	4.63031	-1.332	10.592	11.924
Ecoli	Ec_PDS000122693.8	NCBI_v_CSP2	1.04891	0.979755	3.99949	-1.8	9.799	11.599
Ecoli	Ec_PDS000122726.2	CSP1_v_CSP2	0.979433	0.989637	-1.9338	-9.09	5.222	14.312
Ecoli	Ec_PDS000122726.2	NCBI_v_CSP1	1.02371	0.968418	4.48904	-8.563	17.541	26.104
Ecoli	Ec_PDS000122726.2	NCBI_v_CSP2	1.02513	0.979867	2.55524	-7.929	13.04	20.969
Ecoli	Ec_PDS000135501.13	CSP1_v_CSP2	1.21591	0.967778	2.52568	-4.976	10.027	15.003
Ecoli	Ec_PDS000135501.13	NCBI_v_CSP1	1.11683	0.984349	1.95574	-3.742	7.654	11.396
Ecoli	Ec_PDS000135501.13	NCBI_v_CSP2	1.35954	0.953741	4.48142	-6.474	15.437	21.911
Ecoli	Ec_PDS000154682.4	CSP1_v_CSP2	0.991167	0.987222	-0.0791232	-2.89	2.732	5.622
Ecoli	Ec_PDS000154682.4	NCBI_v_CSP1	0.991139	0.980657	1.11307	-2.375	4.601	6.976
Ecoli	Ec_PDS000154682.4	NCBI_v_CSP2	1.0028	0.988242	1.03395	-1.688	3.756	5.444
Ecoli	Ec_PDS000164845.1	CSP1_v_CSP2	0.939479	0.998701	-0.939394	-4.113	2.234	6.347
Ecoli	Ec_PDS000164845.1	NCBI_v_CSP1	1.08938	0.997687	2.06599	-2.427	6.559	8.986
Ecoli	Ec_PDS000164845.1	NCBI_v_CSP2	1.02552	0.998399	1.1266	-1.482	3.735	5.217
Listeria	Lm_PDS000000260.40	CSP1_v_CSP2	0.980705	0.989506	0.0342276	-2.734	2.802	5.536
Listeria	Lm_PDS000000260.40	NCBI_v_CSP1	1.01357	0.984843	0.858464	-2.54	4.257	6.797
Listeria	Lm_PDS000000260.40	NCBI_v_CSP2	1.00817	0.988384	0.892692	-2.081	3.866	5.947
Listeria	Lm_PDS000000314.82	CSP1_v_CSP2	1.00612	0.98757	-0.0855769	-3.672	3.501	7.173
Listeria	Lm_PDS000000314.82	NCBI_v_CSP1	0.985273	0.984969	0.936058	-3.018	4.89	7.908
Listeria	Lm_PDS000000314.82	NCBI_v_CSP2	1.01322	0.994232	0.850481	-1.614	3.315	4.929
Listeria	Lm_PDS000000319.62	CSP1_v_CSP2	0.988354	0.996924	0.155498	-2.098	2.409	4.507
Listeria	Lm_PDS000000319.62	NCBI_v_CSP1	0.980339	0.993265	0.370919	-2.929	3.671	6.6
Listeria	Lm_PDS000000319.62	NCBI_v_CSP2	0.971664	0.993012	0.526418	-2.885	3.937	6.822
Listeria	Lm_PDS000000337.60	CSP1_v_CSP2	1.01616	0.996805	0.480874	-1.918	2.879	4.797
Listeria	Lm_PDS000000337.60	NCBI_v_CSP1	0.989541	0.993863	-0.187432	-3.446	3.071	6.517
Listeria	Lm_PDS000000337.60	NCBI_v_CSP2	1.01087	0.995944	0.293443	-2.364	2.951	5.315
Listeria	Lm_PDS000001093.40	CSP1_v_CSP2	1.03676	0.988691	-0.453878	-3.237	2.329	5.566
Listeria	Lm_PDS000001093.40	NCBI_v_CSP1	0.962297	0.98605	0.04	-2.973	3.053	6.026
Listeria	Lm_PDS000001093.40	NCBI_v_CSP2	1.00323	0.980327	-0.413878	-3.895	3.067	6.962
Listeria	Lm_PDS000003170.92	CSP1_v_CSP2	0.996579	0.991048	-0.409306	-3.075	2.257	5.332
Listeria	Lm_PDS000003170.92	NCBI_v_CSP1	0.986798	0.987339	0.90923	-2.267	4.085	6.352
Listeria	Lm_PDS000003170.92	NCBI_v_CSP2	0.998889	0.99389	0.499924	-1.702	2.702	4.404
Listeria	Lm_PDS000003173.80	CSP1_v_CSP2	0.971001	0.98711	-0.333894	-2.84	2.172	5.012
Listeria	Lm_PDS000003173.80	NCBI_v_CSP1	1.00926	0.980367	0.695798	-2.434	3.825	6.259
Listeria	Lm_PDS000003173.80	NCBI_v_CSP2	1.00366	0.991103	0.361905	-1.749	2.473	4.222
Listeria	Lm_PDS000003174.64	CSP1_v_CSP2	0.981197	0.984074	-0.436612	-3.31	2.437	5.747
Listeria	Lm_PDS000003174.64	NCBI_v_CSP1	1.00529	0.980954	0.971038	-2.23	4.172	6.402
Listeria	Lm_PDS000003174.64	NCBI_v_CSP2	1.0097	0.988138	0.534426	-2	3.069	5.069
Listeria	Lm_PDS000003223.15	CSP1_v_CSP2	0.988815	0.987977	-0.526316	-2.913	1.861	4.774
Listeria	Lm_PDS000003223.15	NCBI_v_CSP1	1.00881	0.979154	0.819549	-2.406	4.045	6.451
Listeria	Lm_PDS000003223.15	NCBI_v_CSP2	1.0221	0.991213	0.293233	-1.833	2.419	4.252
Listeria	Lm_PDS000003235.48	CSP1_v_CSP2	0.998837	0.997307	-0.101382	-1.995	1.792	3.787
Listeria	Lm_PDS000003235.48	NCBI_v_CSP1	1.00347	0.994261	0.645161	-2.143	3.434	5.577
Listeria	Lm_PDS000003235.48	NCBI_v_CSP2	1.00341	0.992677	0.543779	-2.604	3.692	6.296
Listeria	Lm_PDS000003244.74	CSP1_v_CSP2	0.988341	0.993433	-0.399178	-2.756	1.957	4.713
Listeria	Lm_PDS000003244.74	NCBI_v_CSP1	0.977235	0.987957	0.605489	-2.565	3.776	6.341
Listeria	Lm_PDS000003244.74	NCBI_v_CSP2	0.977786	0.993606	0.206311	-2.127	2.54	4.667
Listeria	Lm_PDS000003294.18	CSP1_v_CSP2	0.989042	0.967505	-0.492914	-5.399	4.413	9.812
Listeria	Lm_PDS000003294.18	NCBI_v_CSP1	0.898421	0.929712	2.07921	-5.096	9.254	14.35
Listeria	Lm_PDS000003294.18	NCBI_v_CSP2	0.944197	0.955807	1.58629	-4.022	7.195	11.217
Listeria	Lm_PDS000003348.63	CSP1_v_CSP2	0.938698	0.984225	-1.21585	-5.477	3.045	8.522
Listeria	Lm_PDS000003348.63	NCBI_v_CSP1	1.0148	0.980788	1.17927	-3.402	5.761	9.163
Listeria	Lm_PDS000003348.63	NCBI_v_CSP2	0.981207	0.994313	-0.0365854	-2.571	2.497	5.068
Listeria	Lm_PDS000005514.51	CSP1_v_CSP2	1.00456	0.995748	-0.254822	-2.785	2.275	5.06
Listeria	Lm_PDS000005514.51	NCBI_v_CSP1	0.988377	0.995247	0.515488	-2.156	3.187	5.343
Listeria	Lm_PDS000005514.51	NCBI_v_CSP2	0.997675	0.995801	0.260666	-2.234	2.755	4.989
Listeria	Lm_PDS000006279.32	CSP1_v_CSP2	0.986934	0.998295	-0.380471	-1.945	1.184	3.129
Listeria	Lm_PDS000006279.32	NCBI_v_CSP1	1.04117	0.996629	0.886869	-1.599	3.373	4.972
Listeria	Lm_PDS000006279.32	NCBI_v_CSP2	1.03034	0.99762	0.506397	-1.541	2.554	4.095
Listeria	Lm_PDS000006328.31	CSP1_v_CSP2	0.95143	0.995068	-0.368964	-1.887	1.149	3.036
Listeria	Lm_PDS000006328.31	NCBI_v_CSP1	1.04718	0.973686	1.50283	-1.897	4.903	6.8
Listeria	Lm_PDS000006328.31	NCBI_v_CSP2	1.00228	0.974685	1.13387	-2.142	4.41	6.552
Listeria	Lm_PDS000024196.42	CSP1_v_CSP2	0.98789	0.986659	0.262418	-4.225	4.75	8.975
Listeria	Lm_PDS000024196.42	NCBI_v_CSP1	0.978506	0.987395	-0.555556	-4.907	3.796	8.703
Listeria	Lm_PDS000024196.42	NCBI_v_CSP2	0.984092	0.991795	-0.293137	-3.803	3.216	7.019
Listeria	Lm_PDS000024361.55	CSP1_v_CSP2	1.00868	0.992955	0.371528	-2.161	2.904	5.065
Listeria	Lm_PDS000024361.55	NCBI_v_CSP1	0.988085	0.992812	-0.211806	-2.764	2.34	5.104
Listeria	Lm_PDS000024361.55	NCBI_v_CSP2	1.00594	0.994998	0.159722	-1.963	2.283	4.246
Listeria	Lm_PDS000024413.26	CSP1_v_CSP2	1.01918	0.994893	0.0486258	-2.185	2.283	4.468
Listeria	Lm_PDS000024413.26	NCBI_v_CSP1	1.00362	0.98462	1.11734	-2.759	4.993	7.752
Listeria	Lm_PDS000024413.26	NCBI_v_CSP2	1.03521	0.991406	1.16596	-1.831	4.163	5.994
Listeria	Lm_PDS000024430.54	CSP1_v_CSP2	0.929505	0.961836	-3.1641	-10.943	4.615	15.558
Listeria	Lm_PDS000024430.54	NCBI_v_CSP1	0.938211	0.957293	0.931187	-7.036	8.898	15.934
Listeria	Lm_PDS000024430.54	NCBI_v_CSP2	0.926337	0.978053	-2.23292	-8.221	3.755	11.976
Listeria	Lm_PDS000024493.15	CSP1_v_CSP2	1.01708	0.987993	0.0175325	-2.684	2.719	5.403
Listeria	Lm_PDS000024493.15	NCBI_v_CSP1	0.924831	0.958525	1.31104	-3.646	6.268	9.914
Listeria	Lm_PDS000024493.15	NCBI_v_CSP2	0.96913	0.975713	1.32857	-2.383	5.04	7.423
Listeria	Lm_PDS000024618.44	CSP1_v_CSP2	0.991331	0.997955	-0.123912	-1.999	1.751	3.75
Listeria	Lm_PDS000024618.44	NCBI_v_CSP1	0.952575	0.984461	-0.577573	-5.704	4.549	10.253
Listeria	Lm_PDS000024618.44	NCBI_v_CSP2	0.945257	0.983426	-0.701485	-6.045	4.642	10.687
Listeria	Lm_PDS000024641.33	CSP1_v_CSP2	0.985308	0.993376	-0.34611	-2.47	1.777	4.247
Listeria	Lm_PDS000024641.33	NCBI_v_CSP1	0.983857	0.98507	0.927437	-2.238	4.093	6.331
Listeria	Lm_PDS000024641.33	NCBI_v_CSP2	0.973927	0.983113	0.581327	-2.803	3.966	6.769
Listeria	Lm_PDS000024684.43	CSP1_v_CSP2	1.00677	0.998807	0.243531	-1.34	1.827	3.167
Listeria	Lm_PDS000024684.43	NCBI_v_CSP1	1.00235	0.998967	0.314688	-1.152	1.781	2.933
Listeria	Lm_PDS000024684.43	NCBI_v_CSP2	1.00917	0.997812	0.558219	-1.593	2.709	4.302
Listeria	Lm_PDS000024685.61	CSP1_v_CSP2	0.983417	0.994915	-0.555655	-2.311	1.2	3.511
Listeria	Lm_PDS000024685.61	NCBI_v_CSP1	1.00088	0.994451	0.719821	-1.1	2.54	3.64
Listeria	Lm_PDS000024685.61	NCBI_v_CSP2	0.99162	0.996767	0.164166	-1.234	1.562	2.796
Listeria	Lm_PDS000024695.37	CSP1_v_CSP2	1.04675	0.999151	0.287762	-1.27	1.845	3.115
Listeria	Lm_PDS000024695.37	NCBI_v_CSP1	0.974038	0.997084	-0.0424987	-2.066	1.981	4.047
Listeria	Lm_PDS000024695.37	NCBI_v_CSP2	1.02148	0.998098	0.245264	-1.386	1.876	3.262
Listeria	Lm_PDS000024823.25	CSP1_v_CSP2	1.00574	0.996829	0.235817	-2.196	2.668	4.864
Listeria	Lm_PDS000024823.25	NCBI_v_CSP1	1.00108	0.997665	-0.0300752	-2.119	2.059	4.178
Listeria	Lm_PDS000024823.25	NCBI_v_CSP2	1.01059	0.998228	0.205742	-1.642	2.054	3.696
Listeria	Lm_PDS000024918.32	CSP1_v_CSP2	0.954473	0.992877	-0.803922	-3.775	2.167	5.942
Listeria	Lm_PDS000024918.32	NCBI_v_CSP1	1.02276	0.99604	0.312941	-1.867	2.493	4.36
Listeria	Lm_PDS000024918.32	NCBI_v_CSP2	0.979833	0.992627	-0.49098	-3.416	2.434	5.85
Listeria	Lm_PDS000025037.54	CSP1_v_CSP2	0.987046	0.98692	0.315315	-2.832	3.463	6.295
Listeria	Lm_PDS000025037.54	NCBI_v_CSP1	1.03868	0.981304	1.10087	-2.935	5.137	8.072
Listeria	Lm_PDS000025037.54	NCBI_v_CSP2	1.04691	0.988957	1.41618	-1.77	4.603	6.373
Listeria	Lm_PDS000025067.48	CSP1_v_CSP2	0.97992	0.998044	-0.414186	-2.341	1.513	3.854
Listeria	Lm_PDS000025067.48	NCBI_v_CSP1	1.01106	0.994417	1.01752	-2.142	4.177	6.319
Listeria	Lm_PDS000025067.48	NCBI_v_CSP2	0.992442	0.99416	0.603333	-2.619	3.826	6.445
Listeria	Lm_PDS000025113.14	CSP1_v_CSP2	0.958128	0.989587	-1.57872	-5.149	1.992	7.141
Listeria	Lm_PDS000025113.14	NCBI_v_CSP1	1.00838	0.988996	0.742315	-2.847	4.331	7.178
Listeria	Lm_PDS000025113.14	NCBI_v_CSP2	0.978114	0.990807	-0.836407	-4.157	2.484	6.641
Listeria	Lm_PDS000025156.39	CSP1_v_CSP2	1.01455	0.987736	0.0824598	-2.398	2.563	4.961
Listeria	Lm_PDS000025156.39	NCBI_v_CSP1	0.988524	0.988886	0.5884	-1.77	2.947	4.717
Listeria	Lm_PDS000025156.39	NCBI_v_CSP2	1.01828	0.991726	0.67086	-1.379	2.721	4.1
Listeria	Lm_PDS000025160.12	CSP1_v_CSP2	0.992848	0.99746	-0.518269	-2.093	1.056	3.149
Listeria	Lm_PDS000025160.12	NCBI_v_CSP1	0.980101	0.997446	-0.139904	-1.744	1.464	3.208
Listeria	Lm_PDS000025160.12	NCBI_v_CSP2	0.973881	0.99572	-0.658173	-2.737	1.42	4.157
Listeria	Lm_PDS000025192.22	CSP1_v_CSP2	1.02025	0.994717	-0.0510133	-2.458	2.356	4.814
Listeria	Lm_PDS000025192.22	NCBI_v_CSP1	0.961509	0.990795	1.25367	-1.899	4.406	6.305
Listeria	Lm_PDS000025192.22	NCBI_v_CSP2	0.986974	0.991585	1.20266	-1.705	4.11	5.815
Listeria	Lm_PDS000025219.36	CSP1_v_CSP2	1.00418	0.993513	-0.825137	-3.824	2.174	5.998
Listeria	Lm_PDS000025219.36	NCBI_v_CSP1	0.999363	0.984481	0.921311	-3.774	5.616	9.39
Listeria	Lm_PDS000025219.36	NCBI_v_CSP2	1.01907	0.993226	0.0961749	-3.052	3.244	6.296
Listeria	Lm_PDS000025362.28	CSP1_v_CSP2	0.99857	0.998315	-0.154572	-1.591	1.282	2.873
Listeria	Lm_PDS000025362.28	NCBI_v_CSP1	1.02489	0.993827	1.18723	-1.711	4.086	5.797
Listeria	Lm_PDS000025362.28	NCBI_v_CSP2	1.02686	0.995476	1.03266	-1.482	3.548	5.03
Listeria	Lm_PDS000025453.31	CSP1_v_CSP2	0.994769	0.995216	-0.308048	-2.455	1.839	4.294
Listeria	Lm_PDS000025453.31	NCBI_v_CSP1	1.00685	0.995351	0.435708	-1.708	2.579	4.287
Listeria	Lm_PDS000025453.31	NCBI_v_CSP2	1.0082	0.997134	0.12766	-1.562	1.817	3.379
Listeria	Lm_PDS000025505.28	CSP1_v_CSP2	1.01587	0.991839	0.841438	-2.832	4.515	7.347
Listeria	Lm_PDS000025505.28	NCBI_v_CSP1	0.968368	0.989251	-0.617336	-4.811	3.576	8.387
Listeria	Lm_PDS000025505.28	NCBI_v_CSP2	0.998614	0.99602	0.224101	-2.272	2.72	4.992
Listeria	Lm_PDS000025513.43	CSP1_v_CSP2	1.00334	0.995932	-0.376923	-3.154	2.4	5.554
Listeria	Lm_PDS000025513.43	NCBI_v_CSP1	1.11487	0.985756	1.21058	-5.633	8.054	13.687
Listeria	Lm_PDS000025513.43	NCBI_v_CSP2	1.1248	0.987198	0.833654	-5.906	7.574	13.48
Listeria	Lm_PDS000036407.11	CSP1_v_CSP2	0.990311	0.991268	-0.426523	-2.121	1.268	3.389
Listeria	Lm_PDS000036407.11	NCBI_v_CSP1	0.97567	0.984219	0.920635	-1.349	3.191	4.54
Listeria	Lm_PDS000036407.11	NCBI_v_CSP2	0.983207	0.99278	0.494112	-1.045	2.034	3.079
Listeria	Lm_PDS000036641.48	CSP1_v_CSP2	1.01715	0.976078	-1.04699	-5.032	2.938	7.97
Listeria	Lm_PDS000036641.48	NCBI_v_CSP1	0.936023	0.954656	1.52937	-3.932	6.99	10.922
Listeria	Lm_PDS000036641.48	NCBI_v_CSP2	1.00447	0.983094	0.48238	-2.799	3.764	6.563
Listeria	Lm_PDS000036645.52	CSP1_v_CSP2	1.02606	0.993601	-0.0515823	-2.341	2.237	4.578
Listeria	Lm_PDS000036645.52	NCBI_v_CSP1	0.991672	0.994028	0.679114	-1.48	2.839	4.319
Listeria	Lm_PDS000036645.52	NCBI_v_CSP2	1.02288	0.992877	0.627532	-1.764	3.019	4.783
Listeria	Lm_PDS000039359.15	CSP1_v_CSP2	0.99578	0.994496	0.121739	-2.961	3.205	6.166
Listeria	Lm_PDS000039359.15	NCBI_v_CSP1	1.03086	0.99208	0.839614	-3.104	4.783	7.887
Listeria	Lm_PDS000039359.15	NCBI_v_CSP2	1.03646	0.996188	0.961353	-1.911	3.834	5.745
Listeria	Lm_PDS000039458.16	CSP1_v_CSP2	0.9631	0.999404	-0.306967	-1.335	0.721	2.056
Listeria	Lm_PDS000039458.16	NCBI_v_CSP1	1.09301	0.997042	0.79971	-1.704	3.303	5.007
Listeria	Lm_PDS000039458.16	NCBI_v_CSP2	1.05313	0.996872	0.492743	-1.556	2.541	4.097
Listeria	Lm_PDS000041936.38	CSP1_v_CSP2	0.999944	0.989507	-0.771259	-5.247	3.705	8.952
Listeria	Lm_PDS000041936.38	NCBI_v_CSP1	0.992363	0.989625	1.56122	-2.908	6.03	8.938
Listeria	Lm_PDS000041936.38	NCBI_v_CSP2	1.00977	0.996477	0.789966	-1.832	3.412	5.244
Listeria	Lm_PDS000043450.28	CSP1_v_CSP2	0.992467	0.982448	-1.32624	-6.279	3.626	9.905
Listeria	Lm_PDS000043450.28	NCBI_v_CSP1	0.994575	0.970739	2.94504	-3.584	9.474	13.058
Listeria	Lm_PDS000043450.28	NCBI_v_CSP2	1.02734	0.992593	1.61879	-1.76	4.998	6.758
Listeria	Lm_PDS000044696.11	CSP1_v_CSP2	1.00728	0.995005	0.0924731	-2.524	2.709	5.233
Listeria	Lm_PDS000044696.11	NCBI_v_CSP1	1.08598	0.969381	3.94409	-3.591	11.479	15.07
Listeria	Lm_PDS000044696.11	NCBI_v_CSP2	1.10208	0.971764	4.03656	-3.36	11.433	14.793
Listeria	Lm_PDS000060146.5	CSP1_v_CSP2	0.37931	0.623188	-0.230769	-1.62	1.158	2.778
Listeria	Lm_PDS000060146.5	NCBI_v_CSP1	0.983294	0.942557	0.0384615	-0.339	0.416	0.755
Listeria	Lm_PDS000060146.5	NCBI_v_CSP2	0.45977	0.724085	-0.192308	-1.427	1.043	2.47
Listeria	Lm_PDS000065444.21	CSP1_v_CSP2	1.0579	0.99763	0.0314626	-1.795	1.857	3.652
Listeria	Lm_PDS000065444.21	NCBI_v_CSP1	0.957929	0.989609	1.08163	-1.941	4.104	6.045
Listeria	Lm_PDS000065444.21	NCBI_v_CSP2	1.01578	0.989583	1.1131	-1.8	4.026	5.826
Listeria	Lm_PDS000161253.2	CSP1_v_CSP2	1.01673	0.993797	1.19964	-2.138	4.537	6.675
Listeria	Lm_PDS000161253.2	NCBI_v_CSP1	0.961176	0.991315	-0.595365	-4.553	3.362	7.915
Listeria	Lm_PDS000161253.2	NCBI_v_CSP2	0.984247	0.992216	0.604278	-3.01	4.218	7.228
Salmonella	Se_PDS000001789.64	CSP1_v_CSP2	1.01211	0.991314	0.335127	-2.361	3.031	5.392
Salmonella	Se_PDS000001789.64	NCBI_v_CSP1	1.00275	0.989285	0.387025	-2.634	3.409	6.043
Salmonella	Se_PDS000001789.64	NCBI_v_CSP2	1.02154	0.987114	0.722152	-2.617	4.061	6.678
Salmonella	Se_PDS000002110.16	CSP1_v_CSP2	0.984778	0.995242	0.238559	-2.561	3.038	5.599
Salmonella	Se_PDS000002110.16	NCBI_v_CSP1	0.998386	0.995883	-0.645245	-3.225	1.934	5.159
Salmonella	Se_PDS000002110.16	NCBI_v_CSP2	0.986658	0.994643	-0.406686	-3.373	2.559	5.932
Salmonella	Se_PDS000002141.100	CSP1_v_CSP2	0.98602	0.99698	-0.63524	-2.532	1.262	3.794
Salmonella	Se_PDS000002141.100	NCBI_v_CSP1	0.991591	0.994161	1.15103	-1.443	3.745	5.188
Salmonella	Se_PDS000002141.100	NCBI_v_CSP2	0.980802	0.994274	0.515789	-2.088	3.119	5.207
Salmonella	Se_PDS000002229.46	CSP1_v_CSP2	1.03593	0.998896	0.747449	-0.914	2.409	3.323
Salmonella	Se_PDS000002229.46	NCBI_v_CSP1	0.955496	0.997779	-0.732993	-2.946	1.48	4.426
Salmonella	Se_PDS000002229.46	NCBI_v_CSP2	0.990822	0.997678	0.0144558	-1.858	1.887	3.745
Salmonella	Se_PDS000002233.82	CSP1_v_CSP2	0.917274	0.976385	-1.49823	-4.726	1.729	6.455
Salmonella	Se_PDS000002233.82	NCBI_v_CSP1	0.994081	0.95206	1.36693	-3.053	5.787	8.84
Salmonella	Se_PDS000002233.82	NCBI_v_CSP2	0.964017	0.982764	-0.1313	-2.854	2.591	5.445
Salmonella	Se_PDS000003757.51	CSP1_v_CSP2	0.972157	0.994963	-1.04245	-3.682	1.598	5.28
Salmonella	Se_PDS000003757.51	NCBI_v_CSP1	1.0498	0.994343	1.57004	-1.538	4.678	6.216
Salmonella	Se_PDS000003757.51	NCBI_v_CSP2	1.02466	0.993302	0.527591	-2.628	3.683	6.311
Salmonella	Se_PDS000003971.70	CSP1_v_CSP2	0.994301	0.997948	-0.654522	-2.871	1.562	4.433
Salmonella	Se_PDS000003971.70	NCBI_v_CSP1	0.992672	0.993225	1.42493	-2.587	5.436	8.023
Salmonella	Se_PDS000003971.70	NCBI_v_CSP2	0.989602	0.993785	0.770413	-3.082	4.622	7.704
Salmonella	Se_PDS000003977.69	CSP1_v_CSP2	1.02947	0.984757	0.851014	-3.245	4.948	8.193
Salmonella	Se_PDS000003977.69	NCBI_v_CSP1	0.942054	0.980787	-0.684396	-5.244	3.875	9.119
Salmonella	Se_PDS000003977.69	NCBI_v_CSP2	0.990621	0.986554	0.166618	-3.489	3.822	7.311
Salmonella	Se_PDS000004194.75	CSP1_v_CSP2	0.975538	0.998086	-0.398838	-3.017	2.219	5.236
Salmonella	Se_PDS000004194.75	NCBI_v_CSP1	1.02778	0.99687	0.610048	-2.769	3.989	6.758
Salmonella	Se_PDS000004194.75	NCBI_v_CSP2	1.00552	0.997828	0.21121	-2.463	2.885	5.348
Salmonella	Se_PDS000004394.125	CSP1_v_CSP2	1.01887	0.991605	-0.297163	-2.713	2.119	4.832
Salmonella	Se_PDS000004394.125	NCBI_v_CSP1	0.99167	0.988226	0.952077	-1.893	3.797	5.69
Salmonella	Se_PDS000004394.125	NCBI_v_CSP2	1.02093	0.990158	0.654914	-1.971	3.28	5.251
Salmonella	Se_PDS000005446.101	CSP1_v_CSP2	0.998012	0.998013	0.209792	-2.059	2.478	4.537
Salmonella	Se_PDS000005446.101	NCBI_v_CSP1	1.01168	0.996354	1.24411	-1.902	4.39	6.292
Salmonella	Se_PDS000005446.101	NCBI_v_CSP2	1.01082	0.995513	1.4539	-2.026	4.934	6.96
Salmonella	Se_PDS000007398.27	CSP1_v_CSP2	0.993791	0.996868	0.159774	-1.842	2.162	4.004
Salmonella	Se_PDS000007398.27	NCBI_v_CSP1	1.03666	0.993534	1.28133	-1.848	4.411	6.259
Salmonella	Se_PDS000007398.27	NCBI_v_CSP2	1.03383	0.993895	1.4411	-1.588	4.47	6.058
Salmonella	Se_PDS000010248.67	CSP1_v_CSP2	1.00866	0.992294	-0.251536	-2.393	1.89	4.283
Salmonella	Se_PDS000010248.67	NCBI_v_CSP1	1.01413	0.988823	0.789728	-1.858	3.438	5.296
Salmonella	Se_PDS000010248.67	NCBI_v_CSP2	1.02517	0.983367	0.538191	-2.702	3.779	6.481
Salmonella	Se_PDS000010686.61	CSP1_v_CSP2	0.972692	0.993483	-0.0284211	-2.105	2.048	4.153
Salmonella	Se_PDS000010686.61	NCBI_v_CSP1	0.960447	0.992179	-0.243509	-2.494	2.007	4.501
Salmonella	Se_PDS000010686.61	NCBI_v_CSP2	0.936369	0.987981	-0.27193	-3.159	2.615	5.774
Salmonella	Se_PDS000015877.72	CSP1_v_CSP2	0.9806	0.968899	0.148564	-3.657	3.954	7.611
Salmonella	Se_PDS000015877.72	NCBI_v_CSP1	0.976508	0.959894	0.104241	-4.284	4.492	8.776
Salmonella	Se_PDS000015877.72	NCBI_v_CSP2	1.01961	0.990307	0.252804	-1.934	2.44	4.374
Salmonella	Se_PDS000016766.28	CSP1_v_CSP2	1.05624	0.9968	-0.0269618	-1.006	0.952	1.958
Salmonella	Se_PDS000016766.28	NCBI_v_CSP1	0.933352	0.996104	-0.028169	-1.111	1.055	2.166
Salmonella	Se_PDS000016766.28	NCBI_v_CSP2	0.98833	0.995423	-0.0551308	-0.975	0.865	1.84
Salmonella	Se_PDS000026579.57	CSP1_v_CSP2	0.999595	0.987798	-0.0265568	-2.963	2.91	5.873
Salmonella	Se_PDS000026579.57	NCBI_v_CSP1	0.987071	0.988412	0.311172	-2.557	3.18	5.737
Salmonella	Se_PDS000026579.57	NCBI_v_CSP2	0.99523	0.984821	0.284615	-2.985	3.554	6.539
Salmonella	Se_PDS000026852.115	CSP1_v_CSP2	1.00782	0.998067	0.0804458	-1.837	1.998	3.835
Salmonella	Se_PDS000026852.115	NCBI_v_CSP1	0.978233	0.99581	0.188855	-2.641	3.019	5.66
Salmonella	Se_PDS000026852.115	NCBI_v_CSP2	0.988189	0.996205	0.269301	-2.373	2.912	5.285
Salmonella	Se_PDS000026947.26	CSP1_v_CSP2	0.995804	0.998202	-0.283664	-2.341	1.774	4.115
Salmonella	Se_PDS000026947.26	NCBI_v_CSP1	1.00425	0.999028	0.569036	-0.955	2.093	3.048
Salmonella	Se_PDS000026947.26	NCBI_v_CSP2	1.00074	0.997938	0.285373	-1.923	2.494	4.417
Salmonella	Se_PDS000027914.55	CSP1_v_CSP2	0.999875	0.99766	-0.0333157	-1.451	1.384	2.835
Salmonella	Se_PDS000027914.55	NCBI_v_CSP1	1.01448	0.993742	0.924907	-1.459	3.309	4.768
Salmonella	Se_PDS000027914.55	NCBI_v_CSP2	1.01491	0.991953	0.891592	-1.806	3.589	5.395
Salmonella	Se_PDS000027980.42	CSP1_v_CSP2	0.982453	0.992538	-0.298824	-2.134	1.537	3.671
Salmonella	Se_PDS000027980.42	NCBI_v_CSP1	1.0405	0.986399	0.701961	-1.95	3.354	5.304
Salmonella	Se_PDS000027980.42	NCBI_v_CSP2	1.03828	0.994398	0.403137	-1.355	2.161	3.516
Salmonella	Se_PDS000028093.75	CSP1_v_CSP2	1.011	0.998659	0.298338	-2.245	2.841	5.086
Salmonella	Se_PDS000028093.75	NCBI_v_CSP1	1.00801	0.997884	1.3766	-1.803	4.557	6.36
Salmonella	Se_PDS000028093.75	NCBI_v_CSP2	1.01965	0.997086	1.67494	-2.145	5.495	7.64
Salmonella	Se_PDS000028443.79	CSP1_v_CSP2	1.01264	0.993471	0.262272	-2.117	2.642	4.759
Salmonella	Se_PDS000028443.79	NCBI_v_CSP1	0.980164	0.993028	-0.0764376	-2.524	2.371	4.895
Salmonella	Se_PDS000028443.79	NCBI_v_CSP2	1.00058	0.994522	0.185835	-1.953	2.325	4.278
Salmonella	Se_PDS000028499.95	CSP1_v_CSP2	0.907406	0.984545	-1.03446	-6.12	4.051	10.171
Salmonella	Se_PDS000028499.95	NCBI_v_CSP1	0.927381	0.983172	-1.26367	-5.973	3.446	9.419
Salmonella	Se_PDS000028499.95	NCBI_v_CSP2	0.855167	0.983686	-2.29813	-8.123	3.527	11.65
Salmonella	Se_PDS000028568.51	CSP1_v_CSP2	0.987983	0.997831	-0.364356	-2.508	1.779	4.287
Salmonella	Se_PDS000028568.51	NCBI_v_CSP1	1.03463	0.994095	0.804158	-2.978	4.587	7.565
Salmonella	Se_PDS000028568.51	NCBI_v_CSP2	1.02374	0.993437	0.439802	-3.449	4.328	7.777
Salmonella	Se_PDS000028885.6	CSP1_v_CSP2	1.00736	0.998386	-0.451735	-3.358	2.454	5.812
Salmonella	Se_PDS000028885.6	NCBI_v_CSP1	0.979543	0.99904	0.241327	-2.173	2.656	4.829
Salmonella	Se_PDS000028885.6	NCBI_v_CSP2	0.987367	0.998045	-0.210407	-3.384	2.963	6.347
Salmonella	Se_PDS000028904.81	CSP1_v_CSP2	0.963629	0.988936	0.0382916	-2.365	2.442	4.807
Salmonella	Se_PDS000028904.81	NCBI_v_CSP1	1.02262	0.984214	0.968651	-1.943	3.88	5.823
Salmonella	Se_PDS000028904.81	NCBI_v_CSP2	0.996549	0.984315	1.00694	-1.874	3.888	5.762
Salmonella	Se_PDS000028937.78	CSP1_v_CSP2	1.00815	0.994299	0.0474804	-1.836	1.931	3.767
Salmonella	Se_PDS000028937.78	NCBI_v_CSP1	1.00471	0.988733	0.622844	-2.058	3.304	5.362
Salmonella	Se_PDS000028937.78	NCBI_v_CSP2	1.02032	0.990297	0.670325	-1.842	3.183	5.025
Salmonella	Se_PDS000029136.52	CSP1_v_CSP2	0.98976	0.998836	-0.828092	-2.515	0.859	3.374
Salmonella	Se_PDS000029136.52	NCBI_v_CSP1	0.999273	0.99766	0.818309	-1.524	3.161	4.685
Salmonella	Se_PDS000029136.52	NCBI_v_CSP2	0.991024	0.998497	-0.00978337	-1.913	1.893	3.806
Salmonella	Se_PDS000029648.36	CSP1_v_CSP2	1.0002	0.987054	0.400419	-2.013	2.813	4.826
Salmonella	Se_PDS000029648.36	NCBI_v_CSP1	0.968204	0.981962	-0.176101	-3.021	2.669	5.69
Salmonella	Se_PDS000029648.36	NCBI_v_CSP2	0.988453	0.989322	0.224319	-1.944	2.393	4.337
Salmonella	Se_PDS000030124.88	CSP1_v_CSP2	0.985472	0.985446	-0.0059676	-3.168	3.156	6.324
Salmonella	Se_PDS000030124.88	NCBI_v_CSP1	0.945091	0.959684	-0.16965	-5.4	5.061	10.461
Salmonella	Se_PDS000030124.88	NCBI_v_CSP2	0.942236	0.95676	-0.175618	-5.592	5.241	10.833
Salmonella	Se_PDS000030230.46	CSP1_v_CSP2	0.979884	0.994899	-0.256284	-2.262	1.749	4.011
Salmonella	Se_PDS000030230.46	NCBI_v_CSP1	1.02475	0.990541	0.91694	-1.891	3.725	5.616
Salmonella	Se_PDS000030230.46	NCBI_v_CSP2	1.01301	0.994197	0.660656	-1.523	2.844	4.367
Salmonella	Se_PDS000030487.66	CSP1_v_CSP2	1.0316	0.982931	-0.932401	-4.815	2.951	7.766
Salmonella	Se_PDS000030487.66	NCBI_v_CSP1	0.959762	0.983903	0.161305	-3.565	3.888	7.453
Salmonella	Se_PDS000030487.66	NCBI_v_CSP2	1.00056	0.977338	-0.771096	-5.072	3.53	8.602
Salmonella	Se_PDS000031836.32	CSP1_v_CSP2	1.01163	0.983552	0.820035	-2.48	4.12	6.6
Salmonella	Se_PDS000031836.32	NCBI_v_CSP1	0.978584	0.967415	0.382979	-4.303	5.069	9.372
Salmonella	Se_PDS000031836.32	NCBI_v_CSP2	1.01196	0.972644	1.20301	-3.087	5.493	8.58
Salmonella	Se_PDS000032619.14	CSP1_v_CSP2	0.99801	0.988214	-0.205614	-2.328	1.917	4.245
Salmonella	Se_PDS000032619.14	NCBI_v_CSP1	0.989583	0.977712	0.676842	-2.273	3.627	5.9
Salmonella	Se_PDS000032619.14	NCBI_v_CSP2	1.00748	0.98562	0.471228	-1.902	2.845	4.747
Salmonella	Se_PDS000032708.28	CSP1_v_CSP2	1.00521	0.998088	0.242938	-1.415	1.901	3.316
Salmonella	Se_PDS000032708.28	NCBI_v_CSP1	1.00065	0.997738	0.762147	-1.04	2.564	3.604
Salmonella	Se_PDS000032708.28	NCBI_v_CSP2	1.00678	0.996739	1.00508	-1.165	3.175	4.34
Salmonella	Se_PDS000032718.53	CSP1_v_CSP2	0.989201	0.991147	0.541566	-1.743	2.826	4.569
Salmonella	Se_PDS000032718.53	NCBI_v_CSP1	1.01249	0.993685	-0.0096231	-1.982	1.963	3.945
Salmonella	Se_PDS000032718.53	NCBI_v_CSP2	1.00761	0.990841	0.531943	-1.831	2.895	4.726
Salmonella	Se_PDS000037294.39	CSP1_v_CSP2	0.981816	0.998343	-0.392896	-2.725	1.939	4.664
Salmonella	Se_PDS000037294.39	NCBI_v_CSP1	1.01839	0.997313	0.396175	-2.575	3.368	5.943
Salmonella	Se_PDS000037294.39	NCBI_v_CSP2	1.00204	0.997823	0.00327869	-2.596	2.602	5.198
Salmonella	Se_PDS000040205.56	CSP1_v_CSP2	1.02733	0.997673	0.520579	-1.457	2.498	3.955
Salmonella	Se_PDS000040205.56	NCBI_v_CSP1	1.02875	0.997153	1.25011	-0.991	3.492	4.483
Salmonella	Se_PDS000040205.56	NCBI_v_CSP2	1.05884	0.99669	1.77069	-0.972	4.514	5.486
Salmonella	Se_PDS000042247.13	CSP1_v_CSP2	0.975392	0.995556	0.228804	-2.9	3.358	6.258
Salmonella	Se_PDS000042247.13	NCBI_v_CSP1	1.05424	0.995691	1.55535	-2.046	5.157	7.203
Salmonella	Se_PDS000042247.13	NCBI_v_CSP2	1.03355	0.996333	1.78415	-1.325	4.893	6.218
Salmonella	Se_PDS000042355.39	CSP1_v_CSP2	1.00206	0.998055	-0.49098	-2.013	1.031	3.044
Salmonella	Se_PDS000042355.39	NCBI_v_CSP1	1.02593	0.996841	0.11451	-1.979	2.208	4.187
Salmonella	Se_PDS000042355.39	NCBI_v_CSP2	1.0284	0.995242	-0.376471	-2.92	2.167	5.087
Salmonella	Se_PDS000042483.31	CSP1_v_CSP2	0.982076	0.994748	-0.00409626	-3.392	3.384	6.776
Salmonella	Se_PDS000042483.31	NCBI_v_CSP1	1.01232	0.992293	0.838198	-3.301	4.978	8.279
Salmonella	Se_PDS000042483.31	NCBI_v_CSP2	0.998926	0.991796	0.834101	-3.416	5.085	8.501
Salmonella	Se_PDS000046344.65	CSP1_v_CSP2	1.27606	0.934527	0.907407	-8.519	10.334	18.853
Salmonella	Se_PDS000046344.65	NCBI_v_CSP1	0.422072	0.703274	-1.68395	-18.229	14.861	33.09
Salmonella	Se_PDS000046344.65	NCBI_v_CSP2	0.723261	0.882578	-0.776543	-8.778	7.225	16.003
Salmonella	Se_PDS000047893.30	CSP1_v_CSP2	0.977482	0.989167	-0.21045	-2.628	2.207	4.835
Salmonella	Se_PDS000047893.30	NCBI_v_CSP1	0.996997	0.989636	1.24311	-1.112	3.598	4.71
Salmonella	Se_PDS000047893.30	NCBI_v_CSP2	0.978124	0.982509	1.03266	-2.041	4.107	6.148
Salmonella	Se_PDS000052571.23	CSP1_v_CSP2	0.942718	0.993082	-0.896682	-4.155	2.362	6.517
Salmonella	Se_PDS000052571.23	NCBI_v_CSP1	1.05218	0.988595	2.51961	-1.641	6.68	8.321
Salmonella	Se_PDS000052571.23	NCBI_v_CSP2	1.00023	0.989991	1.62293	-2.085	5.331	7.416
Salmonella	Se_PDS000060040.17	CSP1_v_CSP2	0.999749	0.992907	-0.557303	-2.12	1.006	3.126
Salmonella	Se_PDS000060040.17	NCBI_v_CSP1	1.05017	0.998557	0.130337	-0.863	1.123	1.986
Salmonella	Se_PDS000060040.17	NCBI_v_CSP2	1.05084	0.992359	-0.426966	-2.257	1.403	3.66
Salmonella	Se_PDS000064974.34	CSP1_v_CSP2	1.02135	0.99703	0.546101	-2.619	3.712	6.331
Salmonella	Se_PDS000064974.34	NCBI_v_CSP1	1.01317	0.997639	0.58933	-2.227	3.405	5.632
Salmonella	Se_PDS000064974.34	NCBI_v_CSP2	1.03602	0.995852	1.13543	-2.787	5.058	7.845
Salmonella	Se_PDS000072598.44	CSP1_v_CSP2	0.993559	0.978727	-0.46792	-7.381	6.445	13.826
Salmonella	Se_PDS000072598.44	NCBI_v_CSP1	0.952702	0.930857	1.76628	-10.929	14.461	25.39
Salmonella	Se_PDS000072598.44	NCBI_v_CSP2	1.02031	0.982037	1.29836	-5.24	7.837	13.077
Salmonella	Se_PDS000091082.2	CSP1_v_CSP2	1.02324	0.997327	-0.0512821	-2.677	2.575	5.252
Salmonella	Se_PDS000091082.2	NCBI_v_CSP1	0.998314	0.999177	0.352187	-1.04	1.744	2.784
Salmonella	Se_PDS000091082.2	NCBI_v_CSP2	1.02154	0.996527	0.300905	-2.645	3.247	5.892
Salmonella	Se_PDS000102184.31	CSP1_v_CSP2	1.01331	0.993272	1.31769	-2.334	4.969	7.303
Salmonella	Se_PDS000102184.31	NCBI_v_CSP1	0.995803	0.988222	-0.45466	-5.288	4.379	9.667
Salmonella	Se_PDS000102184.31	NCBI_v_CSP2	1.02103	0.993212	0.863034	-2.866	4.592	7.458

## Sheet: Table_S9
			Mean SNP differences and 95% confidence intervals for each isolate and method comparison for contig count inliers and outliers
Species	Analysis_ID	Sequence_ID	Method_Comparison	Mean_Difference	SD	Median_Difference	Lower_95CI	Upper_95CI	Contig_Type
Ecoli	Ec_PDS000000709.70	SRR10026264	CSP1_v_CSP2	-1.91045	2.00553	-2	-5.841	2.02	Inlier
Ecoli	Ec_PDS000000709.70	SRR10026264	NCBI_v_CSP1	5.89552	2.61194	6	0.776	11.015	Inlier
Ecoli	Ec_PDS000000709.70	SRR10026264	NCBI_v_CSP2	3.98507	2.24616	4	-0.417	8.387	Inlier
Ecoli	Ec_PDS000000709.70	SRR10067635	CSP1_v_CSP2	-1.95522	1.68265	-2	-5.253	1.343	Inlier
Ecoli	Ec_PDS000000709.70	SRR10067635	NCBI_v_CSP1	2.89552	3.13888	4	-3.257	9.048	Inlier
Ecoli	Ec_PDS000000709.70	SRR10067635	NCBI_v_CSP2	0.940299	2.32822	1	-3.623	5.504	Inlier
Ecoli	Ec_PDS000000709.70	SRR10101176	CSP1_v_CSP2	-0.477612	1.55074	-1	-3.517	2.562	Inlier
Ecoli	Ec_PDS000000709.70	SRR10101176	NCBI_v_CSP1	2.01493	3.00753	2	-3.88	7.91	Inlier
Ecoli	Ec_PDS000000709.70	SRR10101176	NCBI_v_CSP2	1.53731	2.19039	2	-2.756	5.83	Inlier
Ecoli	Ec_PDS000000709.70	SRR10435949	CSP1_v_CSP2	-1.0597	1.54607	-1	-4.09	1.971	Inlier
Ecoli	Ec_PDS000000709.70	SRR10435949	NCBI_v_CSP1	2.83582	2.84763	3	-2.745	8.417	Inlier
Ecoli	Ec_PDS000000709.70	SRR10435949	NCBI_v_CSP2	1.77612	2.44838	1	-3.023	6.575	Inlier
Ecoli	Ec_PDS000000709.70	SRR11235390	CSP1_v_CSP2	-1.85075	1.94822	-2	-5.669	1.968	Inlier
Ecoli	Ec_PDS000000709.70	SRR11235390	NCBI_v_CSP1	5.97015	2.81753	6	0.448	11.492	Inlier
Ecoli	Ec_PDS000000709.70	SRR11235390	NCBI_v_CSP2	4.1194	2.3838	4	-0.553	8.792	Inlier
Ecoli	Ec_PDS000000709.70	SRR12779948	CSP1_v_CSP2	-1.8806	1.93471	-2	-5.673	1.911	Inlier
Ecoli	Ec_PDS000000709.70	SRR12779948	NCBI_v_CSP1	4.08955	2.86426	4	-1.524	9.703	Inlier
Ecoli	Ec_PDS000000709.70	SRR12779948	NCBI_v_CSP2	2.20896	2.37753	2	-2.451	6.869	Inlier
Ecoli	Ec_PDS000000709.70	SRR12968297	CSP1_v_CSP2	-1.20896	1.37662	-1	-3.907	1.489	Inlier
Ecoli	Ec_PDS000000709.70	SRR12968297	NCBI_v_CSP1	4.37313	3.48519	5	-2.458	11.204	Inlier
Ecoli	Ec_PDS000000709.70	SRR12968297	NCBI_v_CSP2	3.16418	2.68891	4	-2.106	8.434	Inlier
Ecoli	Ec_PDS000000709.70	SRR13012242	CSP1_v_CSP2	-0.328358	1.34151	-1	-2.958	2.301	Inlier
Ecoli	Ec_PDS000000709.70	SRR13012242	NCBI_v_CSP1	2.1194	2.92078	3	-3.605	7.844	Inlier
Ecoli	Ec_PDS000000709.70	SRR13012242	NCBI_v_CSP2	1.79104	2.28657	2	-2.691	6.273	Inlier
Ecoli	Ec_PDS000000709.70	SRR14678698	CSP1_v_CSP2	-0.283582	1.47511	-1	-3.175	2.608	Inlier
Ecoli	Ec_PDS000000709.70	SRR14678698	NCBI_v_CSP1	6.04478	3.56937	6	-0.951	13.041	Inlier
Ecoli	Ec_PDS000000709.70	SRR14678698	NCBI_v_CSP2	5.76119	2.81279	6	0.248	11.274	Inlier
Ecoli	Ec_PDS000000709.70	SRR15824994	CSP1_v_CSP2	-1.67164	1.18562	-2	-3.995	0.652	Inlier
Ecoli	Ec_PDS000000709.70	SRR15824994	NCBI_v_CSP1	3.79104	3.29617	4	-2.669	10.251	Inlier
Ecoli	Ec_PDS000000709.70	SRR15824994	NCBI_v_CSP2	2.1194	2.63152	3	-3.038	7.277	Inlier
Ecoli	Ec_PDS000000709.70	SRR1803833	CSP1_v_CSP2	-1.31343	1.38399	-2	-4.026	1.399	Inlier
Ecoli	Ec_PDS000000709.70	SRR1803833	NCBI_v_CSP1	2.92537	3.11065	3	-3.171	9.022	Inlier
Ecoli	Ec_PDS000000709.70	SRR1803833	NCBI_v_CSP2	1.61194	2.38655	2	-3.066	6.289	Inlier
Ecoli	Ec_PDS000000709.70	SRR1804195	CSP1_v_CSP2	-1.8806	1.59091	-2	-4.999	1.238	Inlier
Ecoli	Ec_PDS000000709.70	SRR1804195	NCBI_v_CSP1	3.49254	3.55636	4	-3.478	10.463	Inlier
Ecoli	Ec_PDS000000709.70	SRR1804195	NCBI_v_CSP2	1.61194	2.79043	2	-3.857	7.081	Inlier
Ecoli	Ec_PDS000000709.70	SRR18762520	CSP1_v_CSP2	-1.14925	1.4899	-1	-4.069	1.771	Inlier
Ecoli	Ec_PDS000000709.70	SRR18762520	NCBI_v_CSP1	3.01493	2.91024	3	-2.689	8.719	Inlier
Ecoli	Ec_PDS000000709.70	SRR18762520	NCBI_v_CSP2	1.86567	2.22857	2	-2.502	6.234	Inlier
Ecoli	Ec_PDS000000709.70	SRR19312142	CSP1_v_CSP2	-0.343284	1.32061	0	-2.932	2.245	Inlier
Ecoli	Ec_PDS000000709.70	SRR19312142	NCBI_v_CSP1	1.10448	2.87694	1	-4.534	6.743	Inlier
Ecoli	Ec_PDS000000709.70	SRR19312142	NCBI_v_CSP2	0.761194	2.27696	1	-3.702	5.224	Inlier
Ecoli	Ec_PDS000000709.70	SRR1999089	CSP1_v_CSP2	-1.29851	1.43564	-2	-4.112	1.515	Inlier
Ecoli	Ec_PDS000000709.70	SRR1999089	NCBI_v_CSP1	3.46269	3.56468	4	-3.524	10.449	Inlier
Ecoli	Ec_PDS000000709.70	SRR1999089	NCBI_v_CSP2	2.16418	2.79933	3	-3.322	7.651	Inlier
Ecoli	Ec_PDS000000709.70	SRR1999091	CSP1_v_CSP2	-2.08955	1.40056	-2	-4.835	0.655	Inlier
Ecoli	Ec_PDS000000709.70	SRR1999091	NCBI_v_CSP1	3.47761	3.53921	4	-3.459	10.414	Inlier
Ecoli	Ec_PDS000000709.70	SRR1999091	NCBI_v_CSP2	1.38806	2.82282	2	-4.145	6.921	Inlier
Ecoli	Ec_PDS000000709.70	SRR20711483	CSP1_v_CSP2	-3.34328	1.33203	-3	-5.954	-0.733	Inlier
Ecoli	Ec_PDS000000709.70	SRR20711483	NCBI_v_CSP1	8.22388	3.52403	8	1.317	15.131	Inlier
Ecoli	Ec_PDS000000709.70	SRR20711483	NCBI_v_CSP2	4.8806	2.8205	5	-0.647	10.409	Inlier
Ecoli	Ec_PDS000000709.70	SRR21002133	CSP1_v_CSP2	-2.67164	1.73544	-2	-6.073	0.73	Inlier
Ecoli	Ec_PDS000000709.70	SRR21002133	NCBI_v_CSP1	4.1194	2.04141	4	0.118	8.12	Inlier
Ecoli	Ec_PDS000000709.70	SRR21002133	NCBI_v_CSP2	1.44776	2.0618	1	-2.593	5.489	Inlier
Ecoli	Ec_PDS000000709.70	SRR2177990	CSP1_v_CSP2	-1.95522	1.72708	-2	-5.34	1.43	Inlier
Ecoli	Ec_PDS000000709.70	SRR2177990	NCBI_v_CSP1	4.0597	2.77915	4	-1.387	9.507	Inlier
Ecoli	Ec_PDS000000709.70	SRR2177990	NCBI_v_CSP2	2.10448	2.21657	2	-2.24	6.449	Inlier
Ecoli	Ec_PDS000000709.70	SRR2178041	CSP1_v_CSP2	-1.97015	1.69643	-2	-5.295	1.355	Inlier
Ecoli	Ec_PDS000000709.70	SRR2178041	NCBI_v_CSP1	4.01493	2.79335	4	-1.46	9.49	Inlier
Ecoli	Ec_PDS000000709.70	SRR2178041	NCBI_v_CSP2	2.04478	2.23222	2	-2.33	6.42	Inlier
Ecoli	Ec_PDS000000709.70	SRR22006575	CSP1_v_CSP2	0.61194	1.33661	0	-2.008	3.232	Inlier
Ecoli	Ec_PDS000000709.70	SRR22006575	NCBI_v_CSP1	0.179104	2.93838	1	-5.58	5.938	Inlier
Ecoli	Ec_PDS000000709.70	SRR22006575	NCBI_v_CSP2	0.791045	2.29978	1	-3.716	5.299	Inlier
Ecoli	Ec_PDS000000709.70	SRR23352202	CSP1_v_CSP2	0.373134	1.16562	0	-1.911	2.658	Inlier
Ecoli	Ec_PDS000000709.70	SRR23352202	NCBI_v_CSP1	4.83582	2.76667	5	-0.587	10.258	Inlier
Ecoli	Ec_PDS000000709.70	SRR23352202	NCBI_v_CSP2	5.20896	3.10687	6	-0.88	11.298	Inlier
Ecoli	Ec_PDS000000709.70	SRR24225998	CSP1_v_CSP2	-0.164179	0.962903	0	-2.051	1.723	Inlier
Ecoli	Ec_PDS000000709.70	SRR24225998	NCBI_v_CSP1	4.86567	2.70183	5	-0.43	10.161	Inlier
Ecoli	Ec_PDS000000709.70	SRR24225998	NCBI_v_CSP2	4.70149	2.67432	5	-0.54	9.943	Inlier
Ecoli	Ec_PDS000000709.70	SRR24257869	CSP1_v_CSP2	0.373134	1.16562	0	-1.911	2.658	Inlier
Ecoli	Ec_PDS000000709.70	SRR24257869	NCBI_v_CSP1	3.16418	2.66058	4	-2.05	8.379	Inlier
Ecoli	Ec_PDS000000709.70	SRR24257869	NCBI_v_CSP2	3.53731	2.97122	4	-2.286	9.361	Inlier
Ecoli	Ec_PDS000000709.70	SRR25405041	CSP1_v_CSP2	-1.13433	1.45535	-1	-3.987	1.718	Inlier
Ecoli	Ec_PDS000000709.70	SRR25405041	NCBI_v_CSP1	3.28358	2.49731	3	-1.611	8.178	Inlier
Ecoli	Ec_PDS000000709.70	SRR25405041	NCBI_v_CSP2	2.14925	2.06892	2	-1.906	6.204	Inlier
Ecoli	Ec_PDS000000709.70	SRR25502148	CSP1_v_CSP2	-1.22388	1.52575	-1	-4.214	1.767	Inlier
Ecoli	Ec_PDS000000709.70	SRR25502148	NCBI_v_CSP1	3.34328	2.55576	3	-1.666	8.352	Inlier
Ecoli	Ec_PDS000000709.70	SRR25502148	NCBI_v_CSP2	2.1194	2.2396	2	-2.27	6.509	Inlier
Ecoli	Ec_PDS000000709.70	SRR25646012	CSP1_v_CSP2	-1.22388	1.52575	-1	-4.214	1.767	Inlier
Ecoli	Ec_PDS000000709.70	SRR25646012	NCBI_v_CSP1	3.32836	2.56662	3	-1.702	8.359	Inlier
Ecoli	Ec_PDS000000709.70	SRR25646012	NCBI_v_CSP2	2.10448	2.25048	2	-2.306	6.515	Inlier
Ecoli	Ec_PDS000000709.70	SRR25926057	CSP1_v_CSP2	-2.10448	1.5583	-2	-5.159	0.95	Inlier
Ecoli	Ec_PDS000000709.70	SRR25926057	NCBI_v_CSP1	2.97015	2.28944	3	-1.517	7.457	Inlier
Ecoli	Ec_PDS000000709.70	SRR25926057	NCBI_v_CSP2	0.865672	1.81655	1	-2.695	4.426	Inlier
Ecoli	Ec_PDS000000709.70	SRR26586662	CSP1_v_CSP2	-1.14925	1.43816	-1	-3.968	1.669	Inlier
Ecoli	Ec_PDS000000709.70	SRR26586662	NCBI_v_CSP1	3.37313	2.61021	3	-1.743	8.489	Inlier
Ecoli	Ec_PDS000000709.70	SRR26586662	NCBI_v_CSP2	2.22388	2.24837	2	-2.183	6.631	Inlier
Ecoli	Ec_PDS000000709.70	SRR26681540	CSP1_v_CSP2	-1.13433	1.49642	-1	-4.067	1.799	Inlier
Ecoli	Ec_PDS000000709.70	SRR26681540	NCBI_v_CSP1	3.37313	2.61021	3	-1.743	8.489	Inlier
Ecoli	Ec_PDS000000709.70	SRR26681540	NCBI_v_CSP2	2.23881	2.23667	2	-2.145	6.623	Inlier
Ecoli	Ec_PDS000000709.70	SRR3113862	CSP1_v_CSP2	-4.02985	1.47679	-4	-6.924	-1.135	Inlier
Ecoli	Ec_PDS000000709.70	SRR3113862	NCBI_v_CSP1	4.22388	3.71247	5	-3.052	11.5	Inlier
Ecoli	Ec_PDS000000709.70	SRR3113862	NCBI_v_CSP2	0.19403	2.84572	1	-5.383	5.772	Inlier
Ecoli	Ec_PDS000000709.70	SRR3232034	CSP1_v_CSP2	-0.940299	1.24171	-1	-3.374	1.493	Inlier
Ecoli	Ec_PDS000000709.70	SRR3232034	NCBI_v_CSP1	4.37313	2.81681	5	-1.148	9.894	Inlier
Ecoli	Ec_PDS000000709.70	SRR3232034	NCBI_v_CSP2	3.43284	3.04623	4	-2.538	9.403	Inlier
Ecoli	Ec_PDS000000709.70	SRR3405571	CSP1_v_CSP2	-1.13433	1.60393	-1	-4.278	2.009	Inlier
Ecoli	Ec_PDS000000709.70	SRR3405571	NCBI_v_CSP1	5.29851	2.77988	5	-0.15	10.747	Inlier
Ecoli	Ec_PDS000000709.70	SRR3405571	NCBI_v_CSP2	4.16418	2.65488	4	-1.039	9.368	Inlier
Ecoli	Ec_PDS000000709.70	SRR3405624	CSP1_v_CSP2	-1.19403	1.52989	-1	-4.193	1.805	Inlier
Ecoli	Ec_PDS000000709.70	SRR3405624	NCBI_v_CSP1	5.31343	2.77548	5	-0.126	10.753	Inlier
Ecoli	Ec_PDS000000709.70	SRR3405624	NCBI_v_CSP2	4.1194	2.48341	4	-0.748	8.987	Inlier
Ecoli	Ec_PDS000000709.70	SRR3473835	CSP1_v_CSP2	-1.50746	1.70003	-1	-4.839	1.825	Inlier
Ecoli	Ec_PDS000000709.70	SRR3473835	NCBI_v_CSP1	1.80597	2.21728	2	-2.54	6.152	Inlier
Ecoli	Ec_PDS000000709.70	SRR3473835	NCBI_v_CSP2	0.298507	2.02271	0	-3.666	4.263	Inlier
Ecoli	Ec_PDS000000709.70	SRR4095244	CSP1_v_CSP2	-1.76119	1.60576	-2	-4.908	1.386	Inlier
Ecoli	Ec_PDS000000709.70	SRR4095244	NCBI_v_CSP1	3.41791	3.59777	4	-3.634	10.469	Inlier
Ecoli	Ec_PDS000000709.70	SRR4095244	NCBI_v_CSP2	1.65672	2.64319	2	-3.524	6.837	Inlier
Ecoli	Ec_PDS000000709.70	SRR4095245	CSP1_v_CSP2	-1.97015	1.69643	-2	-5.295	1.355	Inlier
Ecoli	Ec_PDS000000709.70	SRR4095245	NCBI_v_CSP1	5.41791	3.61038	6	-1.658	12.494	Inlier
Ecoli	Ec_PDS000000709.70	SRR4095245	NCBI_v_CSP2	3.44776	2.64165	4	-1.73	8.625	Inlier
Ecoli	Ec_PDS000000709.70	SRR4095247	CSP1_v_CSP2	-2.04478	1.53181	-2	-5.047	0.958	Inlier
Ecoli	Ec_PDS000000709.70	SRR4095247	NCBI_v_CSP1	3.44776	3.63186	4	-3.671	10.566	Inlier
Ecoli	Ec_PDS000000709.70	SRR4095247	NCBI_v_CSP2	1.40299	2.67457	2	-3.839	6.645	Inlier
Ecoli	Ec_PDS000000709.70	SRR4340451	CSP1_v_CSP2	-3.08955	1.51489	-3	-6.059	-0.12	Inlier
Ecoli	Ec_PDS000000709.70	SRR4340451	NCBI_v_CSP1	3.47761	3.58599	4	-3.551	10.506	Inlier
Ecoli	Ec_PDS000000709.70	SRR4340451	NCBI_v_CSP2	0.38806	2.74665	1	-4.995	5.771	Inlier
Ecoli	Ec_PDS000000709.70	SRR5026252	CSP1_v_CSP2	-1.8806	1.48245	-2	-4.786	1.025	Inlier
Ecoli	Ec_PDS000000709.70	SRR5026252	NCBI_v_CSP1	4.44776	3.57298	5	-2.555	11.451	Inlier
Ecoli	Ec_PDS000000709.70	SRR5026252	NCBI_v_CSP2	2.56716	2.6868	3	-2.699	7.833	Inlier
Ecoli	Ec_PDS000000709.70	SRR5892865	CSP1_v_CSP2	-1.10448	1.42631	-1	-3.9	1.691	Inlier
Ecoli	Ec_PDS000000709.70	SRR5892865	NCBI_v_CSP1	3.1791	2.4304	3	-1.584	7.943	Inlier
Ecoli	Ec_PDS000000709.70	SRR5892865	NCBI_v_CSP2	2.07463	1.97954	2	-1.805	5.954	Inlier
Ecoli	Ec_PDS000000709.70	SRR5951685	CSP1_v_CSP2	-1.46269	1.28309	-1	-3.977	1.052	Inlier
Ecoli	Ec_PDS000000709.70	SRR5951685	NCBI_v_CSP1	11.8209	2.66814	12	6.591	17.05	Inlier
Ecoli	Ec_PDS000000709.70	SRR5951685	NCBI_v_CSP2	10.3582	2.68949	10	5.087	15.63	Inlier
Ecoli	Ec_PDS000000709.70	SRR5959719	CSP1_v_CSP2	-0.880597	1.61923	-1	-4.054	2.293	Inlier
Ecoli	Ec_PDS000000709.70	SRR5959719	NCBI_v_CSP1	2.31343	2.46312	2	-2.514	7.141	Inlier
Ecoli	Ec_PDS000000709.70	SRR5959719	NCBI_v_CSP2	1.43284	2.19658	1	-2.872	5.738	Inlier
Ecoli	Ec_PDS000000709.70	SRR6060760	CSP1_v_CSP2	-1.77612	1.49566	-2	-4.708	1.155	Inlier
Ecoli	Ec_PDS000000709.70	SRR6060760	NCBI_v_CSP1	5.02985	2.56415	5	0.004	10.055	Inlier
Ecoli	Ec_PDS000000709.70	SRR6060760	NCBI_v_CSP2	3.25373	2.33772	3	-1.328	7.836	Inlier
Ecoli	Ec_PDS000000709.70	SRR6252979	CSP1_v_CSP2	-1.50746	1.70892	-1	-4.857	1.842	Inlier
Ecoli	Ec_PDS000000709.70	SRR6252979	NCBI_v_CSP1	1.8209	2.20829	2	-2.507	6.149	Inlier
Ecoli	Ec_PDS000000709.70	SRR6252979	NCBI_v_CSP2	0.313433	2.06859	0	-3.741	4.368	Inlier
Ecoli	Ec_PDS000000709.70	SRR6439869	CSP1_v_CSP2	-0.104478	1.11647	0	-2.293	2.084	Inlier
Ecoli	Ec_PDS000000709.70	SRR6439869	NCBI_v_CSP1	4.73134	2.39052	5	0.046	9.417	Inlier
Ecoli	Ec_PDS000000709.70	SRR6439869	NCBI_v_CSP2	4.62687	2.42984	5	-0.136	9.389	Inlier
Ecoli	Ec_PDS000000709.70	SRR7166296	CSP1_v_CSP2	-1.13433	1.54621	-1	-4.165	1.896	Inlier
Ecoli	Ec_PDS000000709.70	SRR7166296	NCBI_v_CSP1	3.41791	2.65803	3	-1.792	8.628	Inlier
Ecoli	Ec_PDS000000709.70	SRR7166296	NCBI_v_CSP2	2.28358	2.37286	2	-2.367	6.934	Inlier
Ecoli	Ec_PDS000000709.70	SRR7244100	CSP1_v_CSP2	-3.01493	1.70998	-3	-6.366	0.337	Inlier
Ecoli	Ec_PDS000000709.70	SRR7244100	NCBI_v_CSP1	4.65672	2.49577	5	-0.235	9.548	Inlier
Ecoli	Ec_PDS000000709.70	SRR7244100	NCBI_v_CSP2	1.64179	1.87246	1	-2.028	5.312	Inlier
Ecoli	Ec_PDS000000709.70	SRR7736004	CSP1_v_CSP2	-1.80597	1.69883	-2	-5.136	1.524	Inlier
Ecoli	Ec_PDS000000709.70	SRR7736004	NCBI_v_CSP1	4.8209	2.81729	5	-0.701	10.343	Inlier
Ecoli	Ec_PDS000000709.70	SRR7736004	NCBI_v_CSP2	3.01493	2.27964	3	-1.453	7.483	Inlier
Ecoli	Ec_PDS000000709.70	SRR7736020	CSP1_v_CSP2	-0.880597	1.60984	-1	-4.036	2.275	Inlier
Ecoli	Ec_PDS000000709.70	SRR7736020	NCBI_v_CSP1	4.71642	2.89621	4	-0.96	10.393	Inlier
Ecoli	Ec_PDS000000709.70	SRR7736020	NCBI_v_CSP2	3.83582	2.2536	3	-0.581	8.253	Inlier
Ecoli	Ec_PDS000000709.70	SRR7736035	CSP1_v_CSP2	-1.8806	1.71908	-2	-5.25	1.489	Inlier
Ecoli	Ec_PDS000000709.70	SRR7736035	NCBI_v_CSP1	5.61194	2.99472	5	-0.258	11.481	Inlier
Ecoli	Ec_PDS000000709.70	SRR7736035	NCBI_v_CSP2	3.73134	2.36504	3	-0.904	8.367	Inlier
Ecoli	Ec_PDS000000709.70	SRR7753005	CSP1_v_CSP2	-1.74627	1.89372	-2	-5.458	1.965	Inlier
Ecoli	Ec_PDS000000709.70	SRR7753005	NCBI_v_CSP1	5.85075	2.82443	6	0.315	11.387	Inlier
Ecoli	Ec_PDS000000709.70	SRR7753005	NCBI_v_CSP2	4.10448	2.2839	4	-0.372	8.581	Inlier
Ecoli	Ec_PDS000000709.70	SRR7895356	CSP1_v_CSP2	-0.820896	1.54651	-1	-3.852	2.21	Inlier
Ecoli	Ec_PDS000000709.70	SRR7895356	NCBI_v_CSP1	6.70149	2.86576	6	1.085	12.318	Inlier
Ecoli	Ec_PDS000000709.70	SRR7895356	NCBI_v_CSP2	5.8806	2.25309	6	1.465	10.297	Inlier
Ecoli	Ec_PDS000000709.70	SRR7908893	CSP1_v_CSP2	-0.537313	1.69963	-1	-3.869	2.794	Inlier
Ecoli	Ec_PDS000000709.70	SRR7908893	NCBI_v_CSP1	5.04478	2.94615	5	-0.73	10.819	Inlier
Ecoli	Ec_PDS000000709.70	SRR7908893	NCBI_v_CSP2	4.50746	2.5068	4	-0.406	9.421	Inlier
Ecoli	Ec_PDS000000709.70	SRR7992411	CSP1_v_CSP2	-1.04478	1.91828	-1	-4.805	2.715	Inlier
Ecoli	Ec_PDS000000709.70	SRR7992411	NCBI_v_CSP1	4.10448	2.87167	4	-1.524	9.733	Inlier
Ecoli	Ec_PDS000000709.70	SRR7992411	NCBI_v_CSP2	3.0597	2.43012	3	-1.703	7.823	Inlier
Ecoli	Ec_PDS000000709.70	SRR8003654	CSP1_v_CSP2	1.76119	1.67051	2	-1.513	5.035	Inlier
Ecoli	Ec_PDS000000709.70	SRR8003654	NCBI_v_CSP1	4.1194	2.84191	4	-1.451	9.689	Inlier
Ecoli	Ec_PDS000000709.70	SRR8003654	NCBI_v_CSP2	5.8806	2.2665	6	1.438	10.323	Inlier
Ecoli	Ec_PDS000000709.70	SRR8111084	CSP1_v_CSP2	-0.447761	1.37382	-1	-3.14	2.245	Inlier
Ecoli	Ec_PDS000000709.70	SRR8111084	NCBI_v_CSP1	4.38806	3.57158	5	-2.612	11.388	Inlier
Ecoli	Ec_PDS000000709.70	SRR8111084	NCBI_v_CSP2	3.9403	2.76822	4	-1.485	9.366	Inlier
Ecoli	Ec_PDS000000709.70	SRR8140140	CSP1_v_CSP2	-0.701493	1.85876	-1	-4.345	2.942	Inlier
Ecoli	Ec_PDS000000709.70	SRR8140140	NCBI_v_CSP1	5.86567	2.86513	5	0.25	11.481	Inlier
Ecoli	Ec_PDS000000709.70	SRR8140140	NCBI_v_CSP2	5.16418	2.28033	5	0.695	9.634	Inlier
Ecoli	Ec_PDS000000709.70	SRR8171190	CSP1_v_CSP2	-1.86567	1.91403	-2	-5.617	1.886	Inlier
Ecoli	Ec_PDS000000709.70	SRR8171190	NCBI_v_CSP1	4.0597	2.87033	4	-1.566	9.685	Inlier
Ecoli	Ec_PDS000000709.70	SRR8171190	NCBI_v_CSP2	2.19403	2.31097	2	-2.335	6.723	Inlier
Ecoli	Ec_PDS000000709.70	SRR8192777	CSP1_v_CSP2	-2.8209	1.65991	-3	-6.074	0.432	Inlier
Ecoli	Ec_PDS000000709.70	SRR8192777	NCBI_v_CSP1	6.13433	2.87568	6	0.498	11.771	Inlier
Ecoli	Ec_PDS000000709.70	SRR8192777	NCBI_v_CSP2	3.31343	2.40081	3	-1.392	8.019	Inlier
Ecoli	Ec_PDS000000709.70	SRR8209159	CSP1_v_CSP2	1.83582	1.61054	2	-1.321	4.992	Inlier
Ecoli	Ec_PDS000000709.70	SRR8209159	NCBI_v_CSP1	3.07463	2.80861	3	-2.43	8.579	Inlier
Ecoli	Ec_PDS000000709.70	SRR8209159	NCBI_v_CSP2	4.91045	2.17932	5	0.639	9.182	Inlier
Ecoli	Ec_PDS000000709.70	SRR8244977	CSP1_v_CSP2	-1.20896	1.57189	-1	-4.29	1.872	Inlier
Ecoli	Ec_PDS000000709.70	SRR8244977	NCBI_v_CSP1	6.08955	3.6379	7	-1.041	13.22	Inlier
Ecoli	Ec_PDS000000709.70	SRR8244977	NCBI_v_CSP2	4.8806	2.76078	5	-0.53	10.292	Inlier
Ecoli	Ec_PDS000000709.70	SRR8317157	CSP1_v_CSP2	-1.73134	1.71077	-2	-5.084	1.622	Inlier
Ecoli	Ec_PDS000000709.70	SRR8317157	NCBI_v_CSP1	7.43284	3.02126	7	1.511	13.354	Inlier
Ecoli	Ec_PDS000000709.70	SRR8317157	NCBI_v_CSP2	5.70149	2.4059	5	0.986	10.417	Inlier
Ecoli	Ec_PDS000000709.70	SRR8928117	CSP1_v_CSP2	-1.01493	1.5125	-1	-3.979	1.95	Inlier
Ecoli	Ec_PDS000000709.70	SRR8928117	NCBI_v_CSP1	3.25373	3.48305	4	-3.573	10.08	Inlier
Ecoli	Ec_PDS000000709.70	SRR8928117	NCBI_v_CSP2	2.23881	2.94952	3	-3.542	8.02	Inlier
Ecoli	Ec_PDS000000709.70	SRR8928118	CSP1_v_CSP2	-1.28358	1.44396	-2	-4.114	1.547	Inlier
Ecoli	Ec_PDS000000709.70	SRR8928118	NCBI_v_CSP1	3	3.17662	3	-3.226	9.226	Inlier
Ecoli	Ec_PDS000000709.70	SRR8928118	NCBI_v_CSP2	1.71642	2.47292	2	-3.13	6.563	Inlier
Ecoli	Ec_PDS000000709.70	SRR8931801	CSP1_v_CSP2	-1.16418	1.44177	-1	-3.99	1.662	Inlier
Ecoli	Ec_PDS000000709.70	SRR8931801	NCBI_v_CSP1	4.1791	3.48123	4	-2.644	11.002	Inlier
Ecoli	Ec_PDS000000709.70	SRR8931801	NCBI_v_CSP2	3.01493	2.88934	4	-2.648	8.678	Inlier
Ecoli	Ec_PDS000000709.70	SRR9659644	CSP1_v_CSP2	-1.52239	1.69989	-1	-4.854	1.809	Inlier
Ecoli	Ec_PDS000000709.70	SRR9659644	NCBI_v_CSP1	1.85075	2.18988	2	-2.441	6.143	Inlier
Ecoli	Ec_PDS000000709.70	SRR9659644	NCBI_v_CSP2	0.328358	2.0699	0	-3.729	4.385	Inlier
Ecoli	Ec_PDS000000709.70	SRR9929415	CSP1_v_CSP2	-0.686567	1.97874	-1	-4.565	3.192	Inlier
Ecoli	Ec_PDS000000709.70	SRR9929415	NCBI_v_CSP1	5.8209	2.84405	5	0.247	11.395	Inlier
Ecoli	Ec_PDS000000709.70	SRR9929415	NCBI_v_CSP2	5.13433	2.51598	5	0.203	10.066	Inlier
Ecoli	Ec_PDS000000712.113	SRR10034995	CSP1_v_CSP2	3.19091	1.60558	3	0.044	6.338	Inlier
Ecoli	Ec_PDS000000712.113	SRR10034995	NCBI_v_CSP1	-2.71818	2.3467	-3	-7.318	1.881	Inlier
Ecoli	Ec_PDS000000712.113	SRR10034995	NCBI_v_CSP2	0.472727	2.23282	0	-3.904	4.849	Inlier
Ecoli	Ec_PDS000000712.113	SRR10035005	CSP1_v_CSP2	3.24545	1.59233	3	0.125	6.366	Inlier
Ecoli	Ec_PDS000000712.113	SRR10035005	NCBI_v_CSP1	-2.75455	2.33908	-3	-7.339	1.83	Inlier
Ecoli	Ec_PDS000000712.113	SRR10035005	NCBI_v_CSP2	0.490909	2.19986	0	-3.821	4.803	Inlier
Ecoli	Ec_PDS000000712.113	SRR10099754	CSP1_v_CSP2	2.04545	1.78878	2	-1.46	5.551	Inlier
Ecoli	Ec_PDS000000712.113	SRR10099754	NCBI_v_CSP1	3.86364	2.15235	4	-0.355	8.082	Inlier
Ecoli	Ec_PDS000000712.113	SRR10099754	NCBI_v_CSP2	5.90909	1.39162	6	3.182	8.637	Inlier
Ecoli	Ec_PDS000000712.113	SRR10197206	CSP1_v_CSP2	-0.236364	1.80177	0	-3.768	3.295	Inlier
Ecoli	Ec_PDS000000712.113	SRR10197206	NCBI_v_CSP1	0.727273	2.37691	1	-3.931	5.386	Inlier
Ecoli	Ec_PDS000000712.113	SRR10197206	NCBI_v_CSP2	0.490909	2.05763	0	-3.542	4.524	Inlier
Ecoli	Ec_PDS000000712.113	SRR10395272	CSP1_v_CSP2	0.772727	1.64601	1	-2.453	3.999	Inlier
Ecoli	Ec_PDS000000712.113	SRR10395272	NCBI_v_CSP1	-0.636364	2.20395	-1	-4.956	3.683	Inlier
Ecoli	Ec_PDS000000712.113	SRR10395272	NCBI_v_CSP2	0.136364	2.24417	0	-4.262	4.535	Inlier
Ecoli	Ec_PDS000000712.113	SRR10513076	CSP1_v_CSP2	0.909091	1.7896	1	-2.598	4.417	Inlier
Ecoli	Ec_PDS000000712.113	SRR10513076	NCBI_v_CSP1	-2.53636	2.36052	-3	-7.163	2.09	Inlier
Ecoli	Ec_PDS000000712.113	SRR10513076	NCBI_v_CSP2	-1.62727	2.4639	-2	-6.456	3.202	Inlier
Ecoli	Ec_PDS000000712.113	SRR10996859	CSP1_v_CSP2	0.936364	1.48557	1	-1.975	3.848	Inlier
Ecoli	Ec_PDS000000712.113	SRR10996859	NCBI_v_CSP1	3.08182	1.76163	3	-0.371	6.535	Inlier
Ecoli	Ec_PDS000000712.113	SRR10996859	NCBI_v_CSP2	4.01818	1.97685	4	0.144	7.893	Inlier
Ecoli	Ec_PDS000000712.113	SRR11935496	CSP1_v_CSP2	0.736364	1.59516	1	-2.39	3.863	Inlier
Ecoli	Ec_PDS000000712.113	SRR11935496	NCBI_v_CSP1	1.53636	1.92843	1	-2.243	5.316	Inlier
Ecoli	Ec_PDS000000712.113	SRR11935496	NCBI_v_CSP2	2.27273	2.01785	2	-1.682	6.228	Inlier
Ecoli	Ec_PDS000000712.113	SRR11935560	CSP1_v_CSP2	1.92727	1.72254	2	-1.449	5.303	Inlier
Ecoli	Ec_PDS000000712.113	SRR11935560	NCBI_v_CSP1	-0.981818	2.29472	-1	-5.479	3.516	Inlier
Ecoli	Ec_PDS000000712.113	SRR11935560	NCBI_v_CSP2	0.945455	2.52633	0	-4.006	5.897	Inlier
Ecoli	Ec_PDS000000712.113	SRR12042862	CSP1_v_CSP2	2.72727	1.96253	2.5	-1.119	6.574	Inlier
Ecoli	Ec_PDS000000712.113	SRR12042862	NCBI_v_CSP1	3.4	2.31944	4	-1.146	7.946	Inlier
Ecoli	Ec_PDS000000712.113	SRR12042862	NCBI_v_CSP2	6.12727	1.55693	6	3.076	9.179	Inlier
Ecoli	Ec_PDS000000712.113	SRR12061426	CSP1_v_CSP2	-0.163636	2.09204	0	-4.264	3.937	Inlier
Ecoli	Ec_PDS000000712.113	SRR12061426	NCBI_v_CSP1	3.38182	2.35002	4	-1.224	7.988	Inlier
Ecoli	Ec_PDS000000712.113	SRR12061426	NCBI_v_CSP2	3.21818	2.33199	3	-1.352	7.789	Inlier
Ecoli	Ec_PDS000000712.113	SRR12135829	CSP1_v_CSP2	1.23636	1.97195	1	-2.629	5.101	Inlier
Ecoli	Ec_PDS000000712.113	SRR12135829	NCBI_v_CSP1	-0.927273	2.38769	-1	-5.607	3.753	Inlier
Ecoli	Ec_PDS000000712.113	SRR12135829	NCBI_v_CSP2	0.309091	2.27772	0	-4.155	4.773	Inlier
Ecoli	Ec_PDS000000712.113	SRR13018687	CSP1_v_CSP2	0.727273	1.88139	0	-2.96	4.415	Inlier
Ecoli	Ec_PDS000000712.113	SRR13018687	NCBI_v_CSP1	0.0181818	2.27464	0	-4.44	4.476	Inlier
Ecoli	Ec_PDS000000712.113	SRR13018687	NCBI_v_CSP2	0.745455	2.2684	0	-3.701	5.191	Inlier
Ecoli	Ec_PDS000000712.113	SRR13645566	CSP1_v_CSP2	1.43636	1.87952	1	-2.247	5.12	Inlier
Ecoli	Ec_PDS000000712.113	SRR13645566	NCBI_v_CSP1	0.745455	2.23581	1	-3.637	5.128	Inlier
Ecoli	Ec_PDS000000712.113	SRR13645566	NCBI_v_CSP2	2.18182	2.24704	2	-2.222	6.586	Inlier
Ecoli	Ec_PDS000000712.113	SRR14631580	CSP1_v_CSP2	-0.754545	1.51558	-1	-3.725	2.216	Inlier
Ecoli	Ec_PDS000000712.113	SRR14631580	NCBI_v_CSP1	0.518182	2.36849	0	-4.124	5.16	Inlier
Ecoli	Ec_PDS000000712.113	SRR14631580	NCBI_v_CSP2	-0.236364	2.79884	-0.5	-5.722	5.249	Inlier
Ecoli	Ec_PDS000000712.113	SRR14808423	CSP1_v_CSP2	-0.363636	1.73325	0	-3.761	3.033	Inlier
Ecoli	Ec_PDS000000712.113	SRR14808423	NCBI_v_CSP1	2.19091	1.98848	2	-1.706	6.088	Inlier
Ecoli	Ec_PDS000000712.113	SRR14808423	NCBI_v_CSP2	1.82727	2.62961	2	-3.327	6.981	Inlier
Ecoli	Ec_PDS000000712.113	SRR14808881	CSP1_v_CSP2	0.254545	1.86438	0	-3.4	3.909	Inlier
Ecoli	Ec_PDS000000712.113	SRR14808881	NCBI_v_CSP1	2.42727	2.19448	2	-1.874	6.728	Inlier
Ecoli	Ec_PDS000000712.113	SRR14808881	NCBI_v_CSP2	2.68182	2.65762	2	-2.527	7.891	Inlier
Ecoli	Ec_PDS000000712.113	SRR14936424	CSP1_v_CSP2	-0.681818	1.80688	-1	-4.223	2.86	Inlier
Ecoli	Ec_PDS000000712.113	SRR14936424	NCBI_v_CSP1	2.43636	2.22796	2	-1.93	6.803	Inlier
Ecoli	Ec_PDS000000712.113	SRR14936424	NCBI_v_CSP2	1.75455	2.43516	1	-3.018	6.527	Inlier
Ecoli	Ec_PDS000000712.113	SRR15128017	CSP1_v_CSP2	-0.309091	1.8659	-1	-3.966	3.348	Inlier
Ecoli	Ec_PDS000000712.113	SRR15128017	NCBI_v_CSP1	3.05455	2.19188	3	-1.241	7.351	Inlier
Ecoli	Ec_PDS000000712.113	SRR15128017	NCBI_v_CSP2	2.74545	2.2152	2	-1.596	7.087	Inlier
Ecoli	Ec_PDS000000712.113	SRR15271139	CSP1_v_CSP2	-0.545455	1.37231	-1	-3.235	2.144	Inlier
Ecoli	Ec_PDS000000712.113	SRR15271139	NCBI_v_CSP1	-0.127273	2.07258	0	-4.189	3.935	Inlier
Ecoli	Ec_PDS000000712.113	SRR15271139	NCBI_v_CSP2	-0.672727	2.29922	-1	-5.179	3.834	Inlier
Ecoli	Ec_PDS000000712.113	SRR15372304	CSP1_v_CSP2	0.290909	2.18143	0	-3.985	4.566	Inlier
Ecoli	Ec_PDS000000712.113	SRR15372304	NCBI_v_CSP1	-0.7	2.45529	0	-5.512	4.112	Inlier
Ecoli	Ec_PDS000000712.113	SRR15372304	NCBI_v_CSP2	-0.409091	2.37454	-1	-5.063	4.245	Inlier
Ecoli	Ec_PDS000000712.113	SRR15441702	CSP1_v_CSP2	3.3	1.79985	3	-0.228	6.828	Inlier
Ecoli	Ec_PDS000000712.113	SRR15441702	NCBI_v_CSP1	1.24545	2.54568	1	-3.744	6.235	Inlier
Ecoli	Ec_PDS000000712.113	SRR15441702	NCBI_v_CSP2	4.54545	2.10999	4	0.41	8.681	Inlier
Ecoli	Ec_PDS000000712.113	SRR15525009	CSP1_v_CSP2	-1.02727	1.9651	-1	-4.879	2.824	Inlier
Ecoli	Ec_PDS000000712.113	SRR15525009	NCBI_v_CSP1	0.509091	2.34127	1	-4.08	5.098	Inlier
Ecoli	Ec_PDS000000712.113	SRR15525009	NCBI_v_CSP2	-0.518182	2.47457	-1	-5.368	4.332	Inlier
Ecoli	Ec_PDS000000712.113	SRR15686220	CSP1_v_CSP2	0.909091	2.05228	0	-3.113	4.931	Inlier
Ecoli	Ec_PDS000000712.113	SRR15686220	NCBI_v_CSP1	-0.227273	2.28942	0	-4.714	4.26	Inlier
Ecoli	Ec_PDS000000712.113	SRR15686220	NCBI_v_CSP2	0.681818	2.33022	0	-3.885	5.249	Inlier
Ecoli	Ec_PDS000000712.113	SRR16204366	CSP1_v_CSP2	0.436364	2.03874	0	-3.559	4.432	Inlier
Ecoli	Ec_PDS000000712.113	SRR16204366	NCBI_v_CSP1	-0.290909	2.05138	0	-4.312	3.73	Inlier
Ecoli	Ec_PDS000000712.113	SRR16204366	NCBI_v_CSP2	0.145455	2.8279	0	-5.397	5.688	Inlier
Ecoli	Ec_PDS000000712.113	SRR16232347	CSP1_v_CSP2	1.49091	1.86097	1	-2.157	5.138	Inlier
Ecoli	Ec_PDS000000712.113	SRR16232347	NCBI_v_CSP1	1.19091	2.31269	1	-3.342	5.724	Inlier
Ecoli	Ec_PDS000000712.113	SRR16232347	NCBI_v_CSP2	2.68182	2.12858	2	-1.49	6.854	Inlier
Ecoli	Ec_PDS000000712.113	SRR16574403	CSP1_v_CSP2	2.63636	1.62958	2	-0.558	5.83	Inlier
Ecoli	Ec_PDS000000712.113	SRR16574403	NCBI_v_CSP1	-1.94545	2.27405	-2	-6.403	2.512	Inlier
Ecoli	Ec_PDS000000712.113	SRR16574403	NCBI_v_CSP2	0.690909	2.27368	0	-3.765	5.147	Inlier
Ecoli	Ec_PDS000000712.113	SRR16599381	CSP1_v_CSP2	2.65455	1.61664	2	-0.514	5.823	Inlier
Ecoli	Ec_PDS000000712.113	SRR16599381	NCBI_v_CSP1	-2	2.29479	-2	-6.498	2.498	Inlier
Ecoli	Ec_PDS000000712.113	SRR16599381	NCBI_v_CSP2	0.654545	2.29653	0	-3.847	5.156	Inlier
Ecoli	Ec_PDS000000712.113	SRR16636813	CSP1_v_CSP2	-0.2	1.98988	-1	-4.1	3.7	Inlier
Ecoli	Ec_PDS000000712.113	SRR16636813	NCBI_v_CSP1	-0.663636	2.33944	-1	-5.249	3.922	Inlier
Ecoli	Ec_PDS000000712.113	SRR16636813	NCBI_v_CSP2	-0.863636	2.36363	-1	-5.496	3.769	Inlier
Ecoli	Ec_PDS000000712.113	SRR16808631	CSP1_v_CSP2	-0.518182	1.75954	-1	-3.967	2.93	Inlier
Ecoli	Ec_PDS000000712.113	SRR16808631	NCBI_v_CSP1	0.672727	2.13365	1	-3.509	4.855	Inlier
Ecoli	Ec_PDS000000712.113	SRR16808631	NCBI_v_CSP2	0.154545	2.17655	0	-4.111	4.421	Inlier
Ecoli	Ec_PDS000000712.113	SRR16919043	CSP1_v_CSP2	-0.418182	1.90789	-1	-4.158	3.321	Inlier
Ecoli	Ec_PDS000000712.113	SRR16919043	NCBI_v_CSP1	-0.363636	2.36072	0	-4.991	4.263	Inlier
Ecoli	Ec_PDS000000712.113	SRR16919043	NCBI_v_CSP2	-0.781818	2.14768	-1	-4.991	3.428	Inlier
Ecoli	Ec_PDS000000712.113	SRR17217919	CSP1_v_CSP2	-0.481818	1.90476	-1	-4.215	3.251	Inlier
Ecoli	Ec_PDS000000712.113	SRR17217919	NCBI_v_CSP1	-1.32727	2.34661	-1	-5.927	3.272	Inlier
Ecoli	Ec_PDS000000712.113	SRR17217919	NCBI_v_CSP2	-1.80909	2.45134	-2	-6.614	2.995	Inlier
Ecoli	Ec_PDS000000712.113	SRR19086768	CSP1_v_CSP2	0.336364	1.8137	0	-3.218	3.891	Inlier
Ecoli	Ec_PDS000000712.113	SRR19086768	NCBI_v_CSP1	-0.427273	2.36356	0	-5.06	4.205	Inlier
Ecoli	Ec_PDS000000712.113	SRR19086768	NCBI_v_CSP2	-0.0909091	2.26074	0	-4.522	4.34	Inlier
Ecoli	Ec_PDS000000712.113	SRR19118235	CSP1_v_CSP2	0.363636	1.80584	0	-3.176	3.903	Inlier
Ecoli	Ec_PDS000000712.113	SRR19118235	NCBI_v_CSP1	-0.390909	2.33873	0	-4.975	4.193	Inlier
Ecoli	Ec_PDS000000712.113	SRR19118235	NCBI_v_CSP2	-0.0272727	2.24409	0	-4.426	4.371	Inlier
Ecoli	Ec_PDS000000712.113	SRR19119637	CSP1_v_CSP2	0.336364	1.8137	0	-3.218	3.891	Inlier
Ecoli	Ec_PDS000000712.113	SRR19119637	NCBI_v_CSP1	-0.4	2.35867	0	-5.023	4.223	Inlier
Ecoli	Ec_PDS000000712.113	SRR19119637	NCBI_v_CSP2	-0.0636364	2.24743	0	-4.469	4.341	Inlier
Ecoli	Ec_PDS000000712.113	SRR19119642	CSP1_v_CSP2	-0.627273	1.79632	-1	-4.148	2.893	Inlier
Ecoli	Ec_PDS000000712.113	SRR19119642	NCBI_v_CSP1	-0.372727	2.34563	0	-4.97	4.225	Inlier
Ecoli	Ec_PDS000000712.113	SRR19119642	NCBI_v_CSP2	-1	2.22991	-1	-5.371	3.371	Inlier
Ecoli	Ec_PDS000000712.113	SRR19141991	CSP1_v_CSP2	0.390909	1.78215	0	-3.102	3.884	Inlier
Ecoli	Ec_PDS000000712.113	SRR19141991	NCBI_v_CSP1	0.6	2.32734	1	-3.962	5.162	Inlier
Ecoli	Ec_PDS000000712.113	SRR19141991	NCBI_v_CSP2	0.990909	2.21129	1	-3.343	5.325	Inlier
Ecoli	Ec_PDS000000712.113	SRR19170049	CSP1_v_CSP2	0.354545	1.79493	0	-3.163	3.873	Inlier
Ecoli	Ec_PDS000000712.113	SRR19170049	NCBI_v_CSP1	-0.372727	2.34563	0	-4.97	4.225	Inlier
Ecoli	Ec_PDS000000712.113	SRR19170049	NCBI_v_CSP2	-0.0181818	2.24623	0	-4.421	4.384	Inlier
Ecoli	Ec_PDS000000712.113	SRR19178712	CSP1_v_CSP2	0.7	1.89906	0	-3.022	4.422	Inlier
Ecoli	Ec_PDS000000712.113	SRR19178712	NCBI_v_CSP1	-0.727273	2.45663	-1	-5.542	4.088	Inlier
Ecoli	Ec_PDS000000712.113	SRR19178712	NCBI_v_CSP2	-0.0272727	2.25225	0	-4.442	4.387	Inlier
Ecoli	Ec_PDS000000712.113	SRR19362788	CSP1_v_CSP2	-0.627273	1.79632	-1	-4.148	2.893	Inlier
Ecoli	Ec_PDS000000712.113	SRR19362788	NCBI_v_CSP1	-0.436364	2.41375	0	-5.167	4.294	Inlier
Ecoli	Ec_PDS000000712.113	SRR19362788	NCBI_v_CSP2	-1.06364	2.25151	-1	-5.477	3.349	Inlier
Ecoli	Ec_PDS000000712.113	SRR20203498	CSP1_v_CSP2	0.436364	1.51159	0	-2.526	3.399	Inlier
Ecoli	Ec_PDS000000712.113	SRR20203498	NCBI_v_CSP1	2.15455	1.95446	2	-1.676	5.985	Inlier
Ecoli	Ec_PDS000000712.113	SRR20203498	NCBI_v_CSP2	2.59091	1.81884	2	-0.974	6.156	Inlier
Ecoli	Ec_PDS000000712.113	SRR20281349	CSP1_v_CSP2	0.7	1.72701	0	-2.685	4.085	Inlier
Ecoli	Ec_PDS000000712.113	SRR20281349	NCBI_v_CSP1	-0.390909	2.33873	0	-4.975	4.193	Inlier
Ecoli	Ec_PDS000000712.113	SRR20281349	NCBI_v_CSP2	0.309091	2.10611	0	-3.819	4.437	Inlier
Ecoli	Ec_PDS000000712.113	SRR20290609	CSP1_v_CSP2	-0.0454545	2.0336	-1	-4.031	3.94	Inlier
Ecoli	Ec_PDS000000712.113	SRR20290609	NCBI_v_CSP1	3.70909	2.24771	4	-0.696	8.115	Inlier
Ecoli	Ec_PDS000000712.113	SRR20290609	NCBI_v_CSP2	3.66364	2.37447	3	-0.99	8.318	Inlier
Ecoli	Ec_PDS000000712.113	SRR21002151	CSP1_v_CSP2	2.67273	1.85289	2	-0.959	6.304	Inlier
Ecoli	Ec_PDS000000712.113	SRR21002151	NCBI_v_CSP1	-2.85455	2.40731	-3	-7.573	1.864	Inlier
Ecoli	Ec_PDS000000712.113	SRR21002151	NCBI_v_CSP2	-0.181818	2.23476	0	-4.562	4.198	Inlier
Ecoli	Ec_PDS000000712.113	SRR21082757	CSP1_v_CSP2	2.77273	1.97999	2.5	-1.108	6.653	Inlier
Ecoli	Ec_PDS000000712.113	SRR21082757	NCBI_v_CSP1	-0.445455	2.46289	0	-5.273	4.382	Inlier
Ecoli	Ec_PDS000000712.113	SRR21082757	NCBI_v_CSP2	2.32727	2.31512	2	-2.21	6.865	Inlier
Ecoli	Ec_PDS000000712.113	SRR21351021	CSP1_v_CSP2	0.872727	1.9541	0	-2.957	4.703	Inlier
Ecoli	Ec_PDS000000712.113	SRR21351021	NCBI_v_CSP1	-2.11818	2.27766	-2	-6.582	2.346	Inlier
Ecoli	Ec_PDS000000712.113	SRR21351021	NCBI_v_CSP2	-1.24545	2.31543	-2	-5.784	3.293	Inlier
Ecoli	Ec_PDS000000712.113	SRR21376776	CSP1_v_CSP2	0.390909	1.78215	0	-3.102	3.884	Inlier
Ecoli	Ec_PDS000000712.113	SRR21376776	NCBI_v_CSP1	-0.381818	2.34611	0	-4.98	4.216	Inlier
Ecoli	Ec_PDS000000712.113	SRR21376776	NCBI_v_CSP2	0.00909091	2.23194	0	-4.365	4.384	Inlier
Ecoli	Ec_PDS000000712.113	SRR21508710	CSP1_v_CSP2	0.972727	2.04293	0	-3.031	4.977	Inlier
Ecoli	Ec_PDS000000712.113	SRR21508710	NCBI_v_CSP1	-0.263636	2.27341	-0.5	-4.719	4.192	Inlier
Ecoli	Ec_PDS000000712.113	SRR21508710	NCBI_v_CSP2	0.709091	2.30415	0	-3.807	5.225	Inlier
Ecoli	Ec_PDS000000712.113	SRR2155433	CSP1_v_CSP2	2.17273	1.58467	2	-0.933	5.279	Inlier
Ecoli	Ec_PDS000000712.113	SRR2155433	NCBI_v_CSP1	0.472727	2.20803	0	-3.855	4.8	Inlier
Ecoli	Ec_PDS000000712.113	SRR2155433	NCBI_v_CSP2	2.64545	2.28913	2	-1.841	7.132	Inlier
Ecoli	Ec_PDS000000712.113	SRR2177989	CSP1_v_CSP2	-0.363636	1.77509	-1	-3.843	3.115	Inlier
Ecoli	Ec_PDS000000712.113	SRR2177989	NCBI_v_CSP1	-0.427273	2.32836	0	-4.991	4.136	Inlier
Ecoli	Ec_PDS000000712.113	SRR2177989	NCBI_v_CSP2	-0.790909	2.12065	-1	-4.947	3.365	Inlier
Ecoli	Ec_PDS000000712.113	SRR21831563	CSP1_v_CSP2	3.02727	1.68892	3	-0.283	6.338	Inlier
Ecoli	Ec_PDS000000712.113	SRR21831563	NCBI_v_CSP1	-2	2.29479	-2	-6.498	2.498	Inlier
Ecoli	Ec_PDS000000712.113	SRR21831563	NCBI_v_CSP2	1.02727	2.20283	1	-3.29	5.345	Inlier
Ecoli	Ec_PDS000000712.113	SRR22283198	CSP1_v_CSP2	0.672727	1.97744	0	-3.203	4.548	Inlier
Ecoli	Ec_PDS000000712.113	SRR22283198	NCBI_v_CSP1	0.190909	2.49952	1	-4.708	5.09	Inlier
Ecoli	Ec_PDS000000712.113	SRR22283198	NCBI_v_CSP2	0.863636	2.32843	1	-3.7	5.427	Inlier
Ecoli	Ec_PDS000000712.113	SRR2415824	CSP1_v_CSP2	1.16364	1.58853	1	-1.95	4.277	Inlier
Ecoli	Ec_PDS000000712.113	SRR2415824	NCBI_v_CSP1	-0.736364	2.19957	-1	-5.047	3.575	Inlier
Ecoli	Ec_PDS000000712.113	SRR2415824	NCBI_v_CSP2	0.427273	2.09613	0	-3.681	4.536	Inlier
Ecoli	Ec_PDS000000712.113	SRR2415829	CSP1_v_CSP2	-1.36364	1.87072	-2	-5.03	2.303	Inlier
Ecoli	Ec_PDS000000712.113	SRR2415829	NCBI_v_CSP1	-0.509091	2.36079	0	-5.136	4.118	Inlier
Ecoli	Ec_PDS000000712.113	SRR2415829	NCBI_v_CSP2	-1.87273	2.17622	-2	-6.138	2.393	Inlier
Ecoli	Ec_PDS000000712.113	SRR24899251	CSP1_v_CSP2	0.236364	2.32232	0	-4.315	4.788	Inlier
Ecoli	Ec_PDS000000712.113	SRR24899251	NCBI_v_CSP1	0.436364	2.3677	0	-4.204	5.077	Inlier
Ecoli	Ec_PDS000000712.113	SRR24899251	NCBI_v_CSP2	0.672727	2.43487	0	-4.1	5.445	Inlier
Ecoli	Ec_PDS000000712.113	SRR24961242	CSP1_v_CSP2	2.35455	1.89923	2	-1.368	6.077	Inlier
Ecoli	Ec_PDS000000712.113	SRR24961242	NCBI_v_CSP1	0.572727	2.52132	0	-4.369	5.514	Inlier
Ecoli	Ec_PDS000000712.113	SRR24961242	NCBI_v_CSP2	2.92727	2.70477	3	-2.374	8.229	Inlier
Ecoli	Ec_PDS000000712.113	SRR25034513	CSP1_v_CSP2	0.427273	1.38444	0	-2.286	3.141	Inlier
Ecoli	Ec_PDS000000712.113	SRR25034513	NCBI_v_CSP1	4.06364	2.06445	4	0.017	8.11	Inlier
Ecoli	Ec_PDS000000712.113	SRR25034513	NCBI_v_CSP2	4.49091	1.98963	4	0.591	8.391	Inlier
Ecoli	Ec_PDS000000712.113	SRR25057971	CSP1_v_CSP2	-1.30909	1.58401	-1	-4.414	1.796	Inlier
Ecoli	Ec_PDS000000712.113	SRR25057971	NCBI_v_CSP1	-0.409091	2.16856	-1	-4.659	3.841	Inlier
Ecoli	Ec_PDS000000712.113	SRR25057971	NCBI_v_CSP2	-1.71818	2.33101	-2	-6.287	2.851	Inlier
Ecoli	Ec_PDS000000712.113	SRR25161642	CSP1_v_CSP2	3.43636	1.97474	4	-0.434	7.307	Inlier
Ecoli	Ec_PDS000000712.113	SRR25161642	NCBI_v_CSP1	-2.1	2.70219	-3	-7.396	3.196	Inlier
Ecoli	Ec_PDS000000712.113	SRR25161642	NCBI_v_CSP2	1.33636	2.21039	1	-2.996	5.669	Inlier
Ecoli	Ec_PDS000000712.113	SRR25618166	CSP1_v_CSP2	1.12727	1.55693	1	-1.924	4.179	Inlier
Ecoli	Ec_PDS000000712.113	SRR25618166	NCBI_v_CSP1	0.0727273	2.22459	0	-4.287	4.433	Inlier
Ecoli	Ec_PDS000000712.113	SRR25618166	NCBI_v_CSP2	1.2	2.33757	1	-3.382	5.782	Inlier
Ecoli	Ec_PDS000000712.113	SRR25779211	CSP1_v_CSP2	-1.35455	1.87493	-2	-5.029	2.32	Inlier
Ecoli	Ec_PDS000000712.113	SRR25779211	NCBI_v_CSP1	1.78182	2.35937	2	-2.842	6.406	Inlier
Ecoli	Ec_PDS000000712.113	SRR25779211	NCBI_v_CSP2	0.427273	2.1179	0	-3.724	4.578	Inlier
Ecoli	Ec_PDS000000712.113	SRR26668570	CSP1_v_CSP2	4.69091	1.9	4	0.967	8.415	Inlier
Ecoli	Ec_PDS000000712.113	SRR26668570	NCBI_v_CSP1	-2.22727	2.39518	-2	-6.922	2.467	Inlier
Ecoli	Ec_PDS000000712.113	SRR26668570	NCBI_v_CSP2	2.46364	2.21619	2	-1.88	6.807	Inlier
Ecoli	Ec_PDS000000712.113	SRR3113755	CSP1_v_CSP2	1.3	1.58866	1	-1.814	4.414	Inlier
Ecoli	Ec_PDS000000712.113	SRR3113755	NCBI_v_CSP1	1.78182	1.90307	2	-1.948	5.512	Inlier
Ecoli	Ec_PDS000000712.113	SRR3113755	NCBI_v_CSP2	3.08182	1.95421	3	-0.748	6.912	Inlier
Ecoli	Ec_PDS000000712.113	SRR3372217	CSP1_v_CSP2	-0.0181818	1.43981	0	-2.84	2.804	Inlier
Ecoli	Ec_PDS000000712.113	SRR3372217	NCBI_v_CSP1	2.05455	1.90526	2	-1.68	5.789	Inlier
Ecoli	Ec_PDS000000712.113	SRR3372217	NCBI_v_CSP2	2.03636	2.24192	2	-2.358	6.43	Inlier
Ecoli	Ec_PDS000000712.113	SRR3394862	CSP1_v_CSP2	-0.0363636	1.50185	0	-2.98	2.907	Inlier
Ecoli	Ec_PDS000000712.113	SRR3394862	NCBI_v_CSP1	1.02727	1.91306	1	-2.722	4.777	Inlier
Ecoli	Ec_PDS000000712.113	SRR3394862	NCBI_v_CSP2	0.990909	2.2524	1	-3.424	5.406	Inlier
Ecoli	Ec_PDS000000712.113	SRR3642716	CSP1_v_CSP2	1.14545	1.53752	1	-1.868	4.159	Inlier
Ecoli	Ec_PDS000000712.113	SRR3642716	NCBI_v_CSP1	-2.67273	1.92096	-3	-6.438	1.092	Inlier
Ecoli	Ec_PDS000000712.113	SRR3642716	NCBI_v_CSP2	-1.52727	2.3175	-2	-6.069	3.015	Inlier
Ecoli	Ec_PDS000000712.113	SRR4054736	CSP1_v_CSP2	0.172727	1.61336	0	-2.989	3.335	Inlier
Ecoli	Ec_PDS000000712.113	SRR4054736	NCBI_v_CSP1	-0.381818	2.02725	0	-4.355	3.592	Inlier
Ecoli	Ec_PDS000000712.113	SRR4054736	NCBI_v_CSP2	-0.209091	2.35826	-1	-4.831	4.413	Inlier
Ecoli	Ec_PDS000000712.113	SRR4094930	CSP1_v_CSP2	-0.154545	1.49731	0	-3.089	2.78	Inlier
Ecoli	Ec_PDS000000712.113	SRR4094930	NCBI_v_CSP1	0.681818	2.08943	0	-3.413	4.777	Inlier
Ecoli	Ec_PDS000000712.113	SRR4094930	NCBI_v_CSP2	0.527273	2.42203	0	-4.22	5.274	Inlier
Ecoli	Ec_PDS000000712.113	SRR4094944	CSP1_v_CSP2	-0.7	1.72169	-1	-4.074	2.674	Inlier
Ecoli	Ec_PDS000000712.113	SRR4094944	NCBI_v_CSP1	2.01818	2.08965	2	-2.077	6.114	Inlier
Ecoli	Ec_PDS000000712.113	SRR4094944	NCBI_v_CSP2	1.31818	2.39239	1	-3.371	6.007	Inlier
Ecoli	Ec_PDS000000712.113	SRR4444460	CSP1_v_CSP2	0.672727	1.63173	1	-2.525	3.871	Inlier
Ecoli	Ec_PDS000000712.113	SRR4444460	NCBI_v_CSP1	-0.954545	1.98797	-1	-4.851	2.942	Inlier
Ecoli	Ec_PDS000000712.113	SRR4444460	NCBI_v_CSP2	-0.281818	2.30728	0	-4.804	4.24	Inlier
Ecoli	Ec_PDS000000712.113	SRR4923935	CSP1_v_CSP2	0.190909	1.50531	0	-2.759	3.141	Inlier
Ecoli	Ec_PDS000000712.113	SRR4923935	NCBI_v_CSP1	0.281818	2.00519	0	-3.648	4.212	Inlier
Ecoli	Ec_PDS000000712.113	SRR4923935	NCBI_v_CSP2	0.472727	1.95222	0	-3.354	4.299	Inlier
Ecoli	Ec_PDS000000712.113	SRR5054520	CSP1_v_CSP2	1.65455	1.69422	2	-1.666	4.975	Inlier
Ecoli	Ec_PDS000000712.113	SRR5054520	NCBI_v_CSP1	0.936364	2.13007	1	-3.238	5.111	Inlier
Ecoli	Ec_PDS000000712.113	SRR5054520	NCBI_v_CSP2	2.59091	2.03319	2	-1.394	6.576	Inlier
Ecoli	Ec_PDS000000712.113	SRR5280676	CSP1_v_CSP2	0.136364	1.58246	0	-2.965	3.238	Inlier
Ecoli	Ec_PDS000000712.113	SRR5280676	NCBI_v_CSP1	1.42727	2.02489	1	-2.541	5.396	Inlier
Ecoli	Ec_PDS000000712.113	SRR5280676	NCBI_v_CSP2	1.56364	2.44021	1	-3.219	6.346	Inlier
Ecoli	Ec_PDS000000712.113	SRR5781904	CSP1_v_CSP2	1.91818	1.6035	2	-1.225	5.061	Inlier
Ecoli	Ec_PDS000000712.113	SRR5781904	NCBI_v_CSP1	0.545455	2.14449	1	-3.658	4.749	Inlier
Ecoli	Ec_PDS000000712.113	SRR5781904	NCBI_v_CSP2	2.46364	1.87047	2	-1.202	6.13	Inlier
Ecoli	Ec_PDS000000712.113	SRR5782059	CSP1_v_CSP2	-0.609091	1.79753	-1	-4.132	2.914	Inlier
Ecoli	Ec_PDS000000712.113	SRR5782059	NCBI_v_CSP1	0.590909	2.29996	1	-3.917	5.099	Inlier
Ecoli	Ec_PDS000000712.113	SRR5782059	NCBI_v_CSP2	-0.0181818	2.20084	0	-4.332	4.295	Inlier
Ecoli	Ec_PDS000000712.113	SRR5890754	CSP1_v_CSP2	1.69091	1.64091	2	-1.525	4.907	Inlier
Ecoli	Ec_PDS000000712.113	SRR5890754	NCBI_v_CSP1	-0.00909091	2.36758	0	-4.649	4.631	Inlier
Ecoli	Ec_PDS000000712.113	SRR5890754	NCBI_v_CSP2	1.68182	2.31442	1	-2.854	6.218	Inlier
Ecoli	Ec_PDS000000712.113	SRR5934643	CSP1_v_CSP2	1.32727	1.47834	1	-1.57	4.225	Inlier
Ecoli	Ec_PDS000000712.113	SRR5934643	NCBI_v_CSP1	0.818182	2.52758	1	-4.136	5.772	Inlier
Ecoli	Ec_PDS000000712.113	SRR5934643	NCBI_v_CSP2	2.14545	2.46382	2	-2.684	6.974	Inlier
Ecoli	Ec_PDS000000712.113	SRR5944593	CSP1_v_CSP2	0.663636	1.83881	0	-2.94	4.268	Inlier
Ecoli	Ec_PDS000000712.113	SRR5944593	NCBI_v_CSP1	1.38182	2.32648	2	-3.178	5.942	Inlier
Ecoli	Ec_PDS000000712.113	SRR5944593	NCBI_v_CSP2	2.04545	2.08263	2	-2.036	6.127	Inlier
Ecoli	Ec_PDS000000712.113	SRR5961300	CSP1_v_CSP2	2.10909	1.29463	2	-0.428	4.647	Inlier
Ecoli	Ec_PDS000000712.113	SRR5961300	NCBI_v_CSP1	2.23636	1.95794	2	-1.601	6.074	Inlier
Ecoli	Ec_PDS000000712.113	SRR5961300	NCBI_v_CSP2	4.34545	1.91295	4	0.596	8.095	Inlier
Ecoli	Ec_PDS000000712.113	SRR5985173	CSP1_v_CSP2	0.181818	1.47257	0	-2.704	3.068	Inlier
Ecoli	Ec_PDS000000712.113	SRR5985173	NCBI_v_CSP1	0.472727	2.36453	0	-4.162	5.107	Inlier
Ecoli	Ec_PDS000000712.113	SRR5985173	NCBI_v_CSP2	0.654545	2.76424	0	-4.763	6.072	Inlier
Ecoli	Ec_PDS000000712.113	SRR5995971	CSP1_v_CSP2	-1.62727	1.84669	-2	-5.247	1.992	Inlier
Ecoli	Ec_PDS000000712.113	SRR5995971	NCBI_v_CSP1	1.91818	2.29931	2	-2.588	6.425	Inlier
Ecoli	Ec_PDS000000712.113	SRR5995971	NCBI_v_CSP2	0.290909	2.12173	0	-3.868	4.449	Inlier
Ecoli	Ec_PDS000000712.113	SRR6129471	CSP1_v_CSP2	0.727273	1.89111	0	-2.979	4.434	Inlier
Ecoli	Ec_PDS000000712.113	SRR6129471	NCBI_v_CSP1	-0.809091	2.4022	0	-5.517	3.899	Inlier
Ecoli	Ec_PDS000000712.113	SRR6129471	NCBI_v_CSP2	-0.0818182	2.31521	0	-4.62	4.456	Inlier
Ecoli	Ec_PDS000000712.113	SRR6293190	CSP1_v_CSP2	-0.836364	1.54758	-1	-3.87	2.197	Inlier
Ecoli	Ec_PDS000000712.113	SRR6293190	NCBI_v_CSP1	2.21818	2.23148	2	-2.155	6.592	Inlier
Ecoli	Ec_PDS000000712.113	SRR6293190	NCBI_v_CSP2	1.38182	2.39258	1	-3.308	6.071	Inlier
Ecoli	Ec_PDS000000712.113	SRR6366162	CSP1_v_CSP2	1.08182	1.79771	1	-2.442	4.605	Inlier
Ecoli	Ec_PDS000000712.113	SRR6366162	NCBI_v_CSP1	1.14545	2.32591	1	-3.413	5.704	Inlier
Ecoli	Ec_PDS000000712.113	SRR6366162	NCBI_v_CSP2	2.22727	1.8899	2	-1.477	5.931	Inlier
Ecoli	Ec_PDS000000712.113	SRR6373713	CSP1_v_CSP2	1.78182	1.62199	2	-1.397	4.961	Inlier
Ecoli	Ec_PDS000000712.113	SRR6373713	NCBI_v_CSP1	-3.27273	2.13279	-3	-7.453	0.907	Inlier
Ecoli	Ec_PDS000000712.113	SRR6373713	NCBI_v_CSP2	-1.49091	2.51143	-2	-6.413	3.431	Inlier
Ecoli	Ec_PDS000000712.113	SRR6439879	CSP1_v_CSP2	0.836364	1.67292	1	-2.443	4.115	Inlier
Ecoli	Ec_PDS000000712.113	SRR6439879	NCBI_v_CSP1	0.690909	2.22474	0	-3.669	5.051	Inlier
Ecoli	Ec_PDS000000712.113	SRR6439879	NCBI_v_CSP2	1.52727	2.21218	1	-2.809	5.863	Inlier
Ecoli	Ec_PDS000000712.113	SRR7280779	CSP1_v_CSP2	0.8	1.65235	1	-2.439	4.039	Inlier
Ecoli	Ec_PDS000000712.113	SRR7280779	NCBI_v_CSP1	-1.50909	2.25342	-2	-5.926	2.908	Inlier
Ecoli	Ec_PDS000000712.113	SRR7280779	NCBI_v_CSP2	-0.709091	2.35923	-1	-5.333	3.915	Inlier
Ecoli	Ec_PDS000000712.113	SRR7505689	CSP1_v_CSP2	-1.87273	1.50296	-2	-4.818	1.073	Inlier
Ecoli	Ec_PDS000000712.113	SRR7505689	NCBI_v_CSP1	2.1	2.01349	2	-1.846	6.046	Inlier
Ecoli	Ec_PDS000000712.113	SRR7505689	NCBI_v_CSP2	0.227273	2.27737	0	-4.236	4.691	Inlier
Ecoli	Ec_PDS000000712.113	SRR7540812	CSP1_v_CSP2	2.01818	1.92035	2	-1.746	5.782	Inlier
Ecoli	Ec_PDS000000712.113	SRR7540812	NCBI_v_CSP1	3.3	2.0071	3	-0.634	7.234	Inlier
Ecoli	Ec_PDS000000712.113	SRR7540812	NCBI_v_CSP2	5.31818	2.15854	5	1.088	9.549	Inlier
Ecoli	Ec_PDS000000712.113	SRR7613440	CSP1_v_CSP2	0.118182	1.45092	0	-2.726	2.962	Inlier
Ecoli	Ec_PDS000000712.113	SRR7613440	NCBI_v_CSP1	2.01818	1.96287	2	-1.829	5.865	Inlier
Ecoli	Ec_PDS000000712.113	SRR7613440	NCBI_v_CSP2	2.13636	2.2564	2	-2.286	6.559	Inlier
Ecoli	Ec_PDS000000712.113	SRR7641349	CSP1_v_CSP2	-0.145455	1.60753	0	-3.296	3.005	Inlier
Ecoli	Ec_PDS000000712.113	SRR7641349	NCBI_v_CSP1	0.190909	1.98386	0	-3.697	4.079	Inlier
Ecoli	Ec_PDS000000712.113	SRR7641349	NCBI_v_CSP2	0.0454545	2.21913	0	-4.304	4.395	Inlier
Ecoli	Ec_PDS000000712.113	SRR7641376	CSP1_v_CSP2	2.10909	1.46109	2	-0.755	4.973	Inlier
Ecoli	Ec_PDS000000712.113	SRR7641376	NCBI_v_CSP1	-0.145455	2.07137	0	-4.205	3.914	Inlier
Ecoli	Ec_PDS000000712.113	SRR7641376	NCBI_v_CSP2	1.96364	1.98123	2	-1.92	5.847	Inlier
Ecoli	Ec_PDS000000712.113	SRR7656162	CSP1_v_CSP2	2.40909	1.74679	2	-1.015	5.833	Inlier
Ecoli	Ec_PDS000000712.113	SRR7656162	NCBI_v_CSP1	1.35455	2.17823	1.5	-2.915	5.624	Inlier
Ecoli	Ec_PDS000000712.113	SRR7656162	NCBI_v_CSP2	3.76364	1.9057	4	0.029	7.499	Inlier
Ecoli	Ec_PDS000000712.113	SRR7656177	CSP1_v_CSP2	2.30909	1.62405	2	-0.874	5.492	Inlier
Ecoli	Ec_PDS000000712.113	SRR7656177	NCBI_v_CSP1	0.609091	2.09891	1	-3.505	4.723	Inlier
Ecoli	Ec_PDS000000712.113	SRR7656177	NCBI_v_CSP2	2.91818	1.95421	2.5	-0.912	6.748	Inlier
Ecoli	Ec_PDS000000712.113	SRR7656347	CSP1_v_CSP2	1.03636	1.77613	1	-2.445	4.518	Inlier
Ecoli	Ec_PDS000000712.113	SRR7656347	NCBI_v_CSP1	-0.745455	2.39049	-1	-5.431	3.94	Inlier
Ecoli	Ec_PDS000000712.113	SRR7656347	NCBI_v_CSP2	0.290909	2.01529	0	-3.659	4.241	Inlier
Ecoli	Ec_PDS000000712.113	SRR7806333	CSP1_v_CSP2	0.0454545	2.10018	0	-4.071	4.162	Inlier
Ecoli	Ec_PDS000000712.113	SRR7806333	NCBI_v_CSP1	-1.86364	2.52502	-2	-6.813	3.085	Inlier
Ecoli	Ec_PDS000000712.113	SRR7806333	NCBI_v_CSP2	-1.81818	2.31937	-2	-6.364	2.728	Inlier
Ecoli	Ec_PDS000000712.113	SRR7821251	CSP1_v_CSP2	-1.95455	1.74727	-2	-5.379	1.47	Inlier
Ecoli	Ec_PDS000000712.113	SRR7821251	NCBI_v_CSP1	1.43636	2.13115	1	-2.741	5.613	Inlier
Ecoli	Ec_PDS000000712.113	SRR7821251	NCBI_v_CSP2	-0.518182	2.5905	-1	-5.595	4.559	Inlier
Ecoli	Ec_PDS000000712.113	SRR7821263	CSP1_v_CSP2	-0.154545	1.53364	0	-3.16	2.851	Inlier
Ecoli	Ec_PDS000000712.113	SRR7821263	NCBI_v_CSP1	3.48182	1.73856	3	0.074	6.889	Inlier
Ecoli	Ec_PDS000000712.113	SRR7821263	NCBI_v_CSP2	3.32727	2.00508	3	-0.603	7.257	Inlier
Ecoli	Ec_PDS000000712.113	SRR7949691	CSP1_v_CSP2	3.74545	1.97896	4	-0.133	7.624	Inlier
Ecoli	Ec_PDS000000712.113	SRR7949691	NCBI_v_CSP1	-4.75455	2.38953	-5	-9.438	-0.071	Inlier
Ecoli	Ec_PDS000000712.113	SRR7949691	NCBI_v_CSP2	-1.00909	1.90843	-1	-4.75	2.731	Inlier
Ecoli	Ec_PDS000000712.113	SRR7970923	CSP1_v_CSP2	4.51818	2.8308	5	-1.03	10.066	Inlier
Ecoli	Ec_PDS000000712.113	SRR7970923	NCBI_v_CSP1	-3.59091	3.83919	-4	-11.116	3.934	Inlier
Ecoli	Ec_PDS000000712.113	SRR7970923	NCBI_v_CSP2	0.927273	2.29762	0.5	-3.576	5.431	Inlier
Ecoli	Ec_PDS000000712.113	SRR8030156	CSP1_v_CSP2	1.47273	1.73844	1	-1.935	4.88	Inlier
Ecoli	Ec_PDS000000712.113	SRR8030156	NCBI_v_CSP1	2.83636	2.0522	3	-1.186	6.859	Inlier
Ecoli	Ec_PDS000000712.113	SRR8030156	NCBI_v_CSP2	4.30909	2.00342	4	0.382	8.236	Inlier
Ecoli	Ec_PDS000000712.113	SRR8401228	CSP1_v_CSP2	4.34545	1.82458	4	0.769	7.922	Inlier
Ecoli	Ec_PDS000000712.113	SRR8401228	NCBI_v_CSP1	6.82727	2.13687	7	2.639	11.015	Inlier
Ecoli	Ec_PDS000000712.113	SRR8401228	NCBI_v_CSP2	11.1727	1.69651	11	7.848	14.498	Inlier
Ecoli	Ec_PDS000000712.113	SRR8575522	CSP1_v_CSP2	-0.0363636	1.35408	0	-2.69	2.618	Inlier
Ecoli	Ec_PDS000000712.113	SRR8575522	NCBI_v_CSP1	2.18182	1.90693	2	-1.556	5.919	Inlier
Ecoli	Ec_PDS000000712.113	SRR8575522	NCBI_v_CSP2	2.14545	1.98543	2	-1.746	6.037	Inlier
Ecoli	Ec_PDS000000712.113	SRR8602140	CSP1_v_CSP2	2.75455	1.62089	3	-0.422	5.931	Inlier
Ecoli	Ec_PDS000000712.113	SRR8602140	NCBI_v_CSP1	2.63636	2.07531	3	-1.431	6.704	Inlier
Ecoli	Ec_PDS000000712.113	SRR8602140	NCBI_v_CSP2	5.39091	1.65399	5	2.149	8.633	Inlier
Ecoli	Ec_PDS000000712.113	SRR8756836	CSP1_v_CSP2	1.02727	1.43648	1	-1.788	3.843	Inlier
Ecoli	Ec_PDS000000712.113	SRR8756836	NCBI_v_CSP1	1.74545	2.0157	1	-2.205	5.696	Inlier
Ecoli	Ec_PDS000000712.113	SRR8756836	NCBI_v_CSP2	2.77273	2.24899	2.5	-1.635	7.181	Inlier
Ecoli	Ec_PDS000000712.113	SRR8931386	CSP1_v_CSP2	-0.345455	1.85945	-1	-3.99	3.299	Inlier
Ecoli	Ec_PDS000000712.113	SRR8931386	NCBI_v_CSP1	0.490909	2.3491	1	-4.113	5.095	Inlier
Ecoli	Ec_PDS000000712.113	SRR8931386	NCBI_v_CSP2	0.145455	2.14962	0	-4.068	4.359	Inlier
Ecoli	Ec_PDS000000712.113	SRR9278456	CSP1_v_CSP2	0.4	1.95453	0	-3.431	4.231	Inlier
Ecoli	Ec_PDS000000712.113	SRR9278456	NCBI_v_CSP1	1.19091	2.28877	2	-3.295	5.677	Inlier
Ecoli	Ec_PDS000000712.113	SRR9278456	NCBI_v_CSP2	1.59091	1.90266	1	-2.138	5.32	Inlier
Ecoli	Ec_PDS000000712.113	SRR9280507	CSP1_v_CSP2	1.99091	1.8548	2	-1.644	5.626	Inlier
Ecoli	Ec_PDS000000712.113	SRR9280507	NCBI_v_CSP1	-1.65455	2.51395	-1	-6.582	3.273	Inlier
Ecoli	Ec_PDS000000712.113	SRR9280507	NCBI_v_CSP2	0.336364	2.03311	0	-3.648	4.321	Inlier
Ecoli	Ec_PDS000000712.113	SRR9960175	CSP1_v_CSP2	2.37273	1.74975	2	-1.057	5.802	Inlier
Ecoli	Ec_PDS000000712.113	SRR9960175	NCBI_v_CSP1	-1.90909	2.15264	-2	-6.128	2.31	Inlier
Ecoli	Ec_PDS000000712.113	SRR9960175	NCBI_v_CSP2	0.463636	2.22858	0	-3.904	4.832	Inlier
Ecoli	Ec_PDS000000712.113	SRR9960177	CSP1_v_CSP2	3.00909	1.75309	3	-0.427	6.445	Inlier
Ecoli	Ec_PDS000000712.113	SRR9960177	NCBI_v_CSP1	-2.66364	2.50606	-3	-7.575	2.248	Inlier
Ecoli	Ec_PDS000000712.113	SRR9960177	NCBI_v_CSP2	0.345455	2.39815	0	-4.355	5.046	Inlier
Ecoli	Ec_PDS000000712.113	SRR9964890	CSP1_v_CSP2	3.55455	2.05246	3	-0.468	7.577	Inlier
Ecoli	Ec_PDS000000712.113	SRR9964890	NCBI_v_CSP1	-2.77273	2.67046	-3	-8.007	2.461	Inlier
Ecoli	Ec_PDS000000712.113	SRR9964890	NCBI_v_CSP2	0.781818	2.23558	1	-3.6	5.163	Inlier
Ecoli	Ec_PDS000000812.66	SRR10393378	CSP1_v_CSP2	2.2625	1.32878	2	-0.342	4.867	Inlier
Ecoli	Ec_PDS000000812.66	SRR10393378	NCBI_v_CSP1	5	2.0189	5	1.043	8.957	Inlier
Ecoli	Ec_PDS000000812.66	SRR10393378	NCBI_v_CSP2	7.2625	2.23178	6	2.888	11.637	Inlier
Ecoli	Ec_PDS000000812.66	SRR11074955	CSP1_v_CSP2	0.3375	1.42264	0	-2.451	3.126	Inlier
Ecoli	Ec_PDS000000812.66	SRR11074955	NCBI_v_CSP1	2.0375	1.79622	2	-1.483	5.558	Inlier
Ecoli	Ec_PDS000000812.66	SRR11074955	NCBI_v_CSP2	2.375	1.93158	2	-1.411	6.161	Inlier
Ecoli	Ec_PDS000000812.66	SRR11095781	CSP1_v_CSP2	1.3625	1.51986	1	-1.616	4.341	Inlier
Ecoli	Ec_PDS000000812.66	SRR11095781	NCBI_v_CSP1	9.4875	2.00628	9	5.555	13.42	Inlier
Ecoli	Ec_PDS000000812.66	SRR11095781	NCBI_v_CSP2	10.85	2.05063	10	6.831	14.869	Inlier
Ecoli	Ec_PDS000000812.66	SRR11114754	CSP1_v_CSP2	-1.55	1.46607	-2	-4.423	1.323	Inlier
Ecoli	Ec_PDS000000812.66	SRR11114754	NCBI_v_CSP1	2.0875	1.87045	2	-1.579	5.754	Inlier
Ecoli	Ec_PDS000000812.66	SRR11114754	NCBI_v_CSP2	0.5375	2.34355	0	-4.056	5.131	Inlier
Ecoli	Ec_PDS000000812.66	SRR12956983	CSP1_v_CSP2	0.05	1.56626	0	-3.02	3.12	Inlier
Ecoli	Ec_PDS000000812.66	SRR12956983	NCBI_v_CSP1	4.8875	1.69133	5	1.573	8.202	Inlier
Ecoli	Ec_PDS000000812.66	SRR12956983	NCBI_v_CSP2	4.9375	2.31311	4	0.404	9.471	Inlier
Ecoli	Ec_PDS000000812.66	SRR13291120	CSP1_v_CSP2	-2.15	1.63893	-2	-5.362	1.062	Inlier
Ecoli	Ec_PDS000000812.66	SRR13291120	NCBI_v_CSP1	3.075	1.86082	3	-0.572	6.722	Inlier
Ecoli	Ec_PDS000000812.66	SRR13291120	NCBI_v_CSP2	0.925	2.47915	0	-3.934	5.784	Inlier
Ecoli	Ec_PDS000000812.66	SRR15253452	CSP1_v_CSP2	0.5	1.32168	0	-2.09	3.09	Inlier
Ecoli	Ec_PDS000000812.66	SRR15253452	NCBI_v_CSP1	2.225	2.18148	1	-2.051	6.501	Inlier
Ecoli	Ec_PDS000000812.66	SRR15253452	NCBI_v_CSP2	2.725	2.43381	2	-2.045	7.495	Inlier
Ecoli	Ec_PDS000000812.66	SRR1640154	CSP1_v_CSP2	-0.2	1.21593	0	-2.583	2.183	Inlier
Ecoli	Ec_PDS000000812.66	SRR1640154	NCBI_v_CSP1	3.6625	1.78562	4	0.163	7.162	Inlier
Ecoli	Ec_PDS000000812.66	SRR1640154	NCBI_v_CSP2	3.4625	2.12843	3	-0.709	7.634	Inlier
Ecoli	Ec_PDS000000812.66	SRR16575000	CSP1_v_CSP2	0.0125	1.31682	0	-2.568	2.593	Inlier
Ecoli	Ec_PDS000000812.66	SRR16575000	NCBI_v_CSP1	1.95	1.75672	2	-1.493	5.393	Inlier
Ecoli	Ec_PDS000000812.66	SRR16575000	NCBI_v_CSP2	1.9625	1.97736	1	-1.913	5.838	Inlier
Ecoli	Ec_PDS000000812.66	SRR16684247	CSP1_v_CSP2	-1.3	1.49599	-1	-4.232	1.632	Inlier
Ecoli	Ec_PDS000000812.66	SRR16684247	NCBI_v_CSP1	3.2125	1.88729	3	-0.487	6.912	Inlier
Ecoli	Ec_PDS000000812.66	SRR16684247	NCBI_v_CSP2	1.9125	2.42453	1	-2.839	6.664	Inlier
Ecoli	Ec_PDS000000812.66	SRR17263842	CSP1_v_CSP2	-1.175	1.9342	-2	-4.966	2.616	Inlier
Ecoli	Ec_PDS000000812.66	SRR17263842	NCBI_v_CSP1	2.2375	2.04533	2	-1.771	6.246	Inlier
Ecoli	Ec_PDS000000812.66	SRR17263842	NCBI_v_CSP2	1.0625	2.90936	0	-4.64	6.765	Inlier
Ecoli	Ec_PDS000000812.66	SRR1732282	CSP1_v_CSP2	-2.15	1.76535	-3	-5.61	1.31	Inlier
Ecoli	Ec_PDS000000812.66	SRR1732282	NCBI_v_CSP1	4.9	2.12639	4.5	0.732	9.068	Inlier
Ecoli	Ec_PDS000000812.66	SRR1732282	NCBI_v_CSP2	2.75	2.66007	2	-2.464	7.964	Inlier
Ecoli	Ec_PDS000000812.66	SRR18686278	CSP1_v_CSP2	-0.4125	1.6435	-1	-3.634	2.809	Inlier
Ecoli	Ec_PDS000000812.66	SRR18686278	NCBI_v_CSP1	2.225	2.12266	2	-1.935	6.385	Inlier
Ecoli	Ec_PDS000000812.66	SRR18686278	NCBI_v_CSP2	1.8125	2.64381	1	-3.369	6.994	Inlier
Ecoli	Ec_PDS000000812.66	SRR1944447	CSP1_v_CSP2	-1.6	1.41063	-2	-4.365	1.165	Inlier
Ecoli	Ec_PDS000000812.66	SRR1944447	NCBI_v_CSP1	1.6125	1.99679	1	-2.301	5.526	Inlier
Ecoli	Ec_PDS000000812.66	SRR1944447	NCBI_v_CSP2	0.0125	2.44169	-1	-4.773	4.798	Inlier
Ecoli	Ec_PDS000000812.66	SRR19545412	CSP1_v_CSP2	0.6875	1.40157	0.5	-2.06	3.435	Inlier
Ecoli	Ec_PDS000000812.66	SRR19545412	NCBI_v_CSP1	3.6	1.85281	3	-0.031	7.231	Inlier
Ecoli	Ec_PDS000000812.66	SRR19545412	NCBI_v_CSP2	4.2875	2.3503	4	-0.319	8.894	Inlier
Ecoli	Ec_PDS000000812.66	SRR20438242	CSP1_v_CSP2	0.3875	1.54669	0	-2.644	3.419	Inlier
Ecoli	Ec_PDS000000812.66	SRR20438242	NCBI_v_CSP1	9.3625	2.97349	10	3.535	15.19	Inlier
Ecoli	Ec_PDS000000812.66	SRR20438242	NCBI_v_CSP2	9.75	3.33565	10	3.212	16.288	Inlier
Ecoli	Ec_PDS000000812.66	SRR21851713	CSP1_v_CSP2	0.8875	1.51777	1	-2.087	3.862	Inlier
Ecoli	Ec_PDS000000812.66	SRR21851713	NCBI_v_CSP1	3.975	1.90253	4	0.246	7.704	Inlier
Ecoli	Ec_PDS000000812.66	SRR21851713	NCBI_v_CSP2	4.8625	2.42217	4	0.115	9.61	Inlier
Ecoli	Ec_PDS000000812.66	SRR22085415	CSP1_v_CSP2	1.025	1.46672	1	-1.85	3.9	Inlier
Ecoli	Ec_PDS000000812.66	SRR22085415	NCBI_v_CSP1	1.9875	1.79658	2	-1.534	5.509	Inlier
Ecoli	Ec_PDS000000812.66	SRR22085415	NCBI_v_CSP2	3.0125	2.39458	2	-1.681	7.706	Inlier
Ecoli	Ec_PDS000000812.66	SRR22894972	CSP1_v_CSP2	-1.6	1.63506	-2	-4.805	1.605	Inlier
Ecoli	Ec_PDS000000812.66	SRR22894972	NCBI_v_CSP1	1.8875	2.09879	1.5	-2.226	6.001	Inlier
Ecoli	Ec_PDS000000812.66	SRR22894972	NCBI_v_CSP2	0.2875	2.69173	-1	-4.988	5.563	Inlier
Ecoli	Ec_PDS000000812.66	SRR22903660	CSP1_v_CSP2	-2.2125	1.90731	-2	-5.951	1.526	Inlier
Ecoli	Ec_PDS000000812.66	SRR22903660	NCBI_v_CSP1	5.3375	1.87552	5	1.662	9.013	Inlier
Ecoli	Ec_PDS000000812.66	SRR22903660	NCBI_v_CSP2	3.125	2.44108	2	-1.659	7.909	Inlier
Ecoli	Ec_PDS000000812.66	SRR23441488	CSP1_v_CSP2	-0.35	1.31303	0	-2.923	2.223	Inlier
Ecoli	Ec_PDS000000812.66	SRR23441488	NCBI_v_CSP1	2.0875	2.42974	1	-2.675	6.85	Inlier
Ecoli	Ec_PDS000000812.66	SRR23441488	NCBI_v_CSP2	1.7375	2.47899	1	-3.121	6.596	Inlier
Ecoli	Ec_PDS000000812.66	SRR23441489	CSP1_v_CSP2	-0.2625	1.35706	0	-2.922	2.397	Inlier
Ecoli	Ec_PDS000000812.66	SRR23441489	NCBI_v_CSP1	2.0875	2.42974	1	-2.675	6.85	Inlier
Ecoli	Ec_PDS000000812.66	SRR23441489	NCBI_v_CSP2	1.825	2.54466	1	-3.162	6.812	Inlier
Ecoli	Ec_PDS000000812.66	SRR23459696	CSP1_v_CSP2	-1.3	1.83772	-1	-4.902	2.302	Inlier
Ecoli	Ec_PDS000000812.66	SRR23459696	NCBI_v_CSP1	4.3625	1.87754	4	0.683	8.042	Inlier
Ecoli	Ec_PDS000000812.66	SRR23459696	NCBI_v_CSP2	3.0625	2.50743	2	-1.852	7.977	Inlier
Ecoli	Ec_PDS000000812.66	SRR23630092	CSP1_v_CSP2	-0.2625	1.35706	0	-2.922	2.397	Inlier
Ecoli	Ec_PDS000000812.66	SRR23630092	NCBI_v_CSP1	2.0875	2.42974	1	-2.675	6.85	Inlier
Ecoli	Ec_PDS000000812.66	SRR23630092	NCBI_v_CSP2	1.825	2.54466	1	-3.162	6.812	Inlier
Ecoli	Ec_PDS000000812.66	SRR23759206	CSP1_v_CSP2	-0.225	1.37772	0	-2.925	2.475	Inlier
Ecoli	Ec_PDS000000812.66	SRR23759206	NCBI_v_CSP1	2.075	2.42234	1	-2.673	6.823	Inlier
Ecoli	Ec_PDS000000812.66	SRR23759206	NCBI_v_CSP2	1.85	2.57102	1	-3.189	6.889	Inlier
Ecoli	Ec_PDS000000812.66	SRR23759207	CSP1_v_CSP2	-0.1625	1.43592	0	-2.977	2.652	Inlier
Ecoli	Ec_PDS000000812.66	SRR23759207	NCBI_v_CSP1	2.075	2.42234	1	-2.673	6.823	Inlier
Ecoli	Ec_PDS000000812.66	SRR23759207	NCBI_v_CSP2	1.9125	2.62024	1	-3.223	7.048	Inlier
Ecoli	Ec_PDS000000812.66	SRR23759208	CSP1_v_CSP2	-1.85	1.5103	-1	-4.81	1.11	Inlier
Ecoli	Ec_PDS000000812.66	SRR23759208	NCBI_v_CSP1	3.6625	2.76022	3	-1.747	9.072	Inlier
Ecoli	Ec_PDS000000812.66	SRR23759208	NCBI_v_CSP2	1.8125	2.53129	1	-3.149	6.774	Inlier
Ecoli	Ec_PDS000000812.66	SRR23759209	CSP1_v_CSP2	-0.1375	1.45605	0	-2.991	2.716	Inlier
Ecoli	Ec_PDS000000812.66	SRR23759209	NCBI_v_CSP1	2.0625	2.44092	1	-2.722	6.847	Inlier
Ecoli	Ec_PDS000000812.66	SRR23759209	NCBI_v_CSP2	1.925	2.60367	1	-3.178	7.028	Inlier
Ecoli	Ec_PDS000000812.66	SRR23759210	CSP1_v_CSP2	-0.2625	1.35706	0	-2.922	2.397	Inlier
Ecoli	Ec_PDS000000812.66	SRR23759210	NCBI_v_CSP1	2.05	2.402	1	-2.658	6.758	Inlier
Ecoli	Ec_PDS000000812.66	SRR23759210	NCBI_v_CSP2	1.7875	2.50414	1	-3.121	6.696	Inlier
Ecoli	Ec_PDS000000812.66	SRR23759211	CSP1_v_CSP2	-0.8625	1.50731	0	-3.817	2.092	Inlier
Ecoli	Ec_PDS000000812.66	SRR23759211	NCBI_v_CSP1	2.6375	2.65408	2	-2.564	7.839	Inlier
Ecoli	Ec_PDS000000812.66	SRR23759211	NCBI_v_CSP2	1.775	2.439	1	-3.005	6.555	Inlier
Ecoli	Ec_PDS000000812.66	SRR23759212	CSP1_v_CSP2	0.7625	1.37098	1	-1.925	3.45	Inlier
Ecoli	Ec_PDS000000812.66	SRR23759212	NCBI_v_CSP1	2.0875	2.42974	1	-2.675	6.85	Inlier
Ecoli	Ec_PDS000000812.66	SRR23759212	NCBI_v_CSP2	2.85	2.59064	2	-2.228	7.928	Inlier
Ecoli	Ec_PDS000000812.66	SRR23873185	CSP1_v_CSP2	-0.2625	1.35706	0	-2.922	2.397	Inlier
Ecoli	Ec_PDS000000812.66	SRR23873185	NCBI_v_CSP1	2.0125	2.28641	1	-2.469	6.494	Inlier
Ecoli	Ec_PDS000000812.66	SRR23873185	NCBI_v_CSP2	1.75	2.40516	1	-2.964	6.464	Inlier
Ecoli	Ec_PDS000000812.66	SRR23976411	CSP1_v_CSP2	-0.425	1.40321	0	-3.175	2.325	Inlier
Ecoli	Ec_PDS000000812.66	SRR23976411	NCBI_v_CSP1	2.075	2.42234	1	-2.673	6.823	Inlier
Ecoli	Ec_PDS000000812.66	SRR23976411	NCBI_v_CSP2	1.65	2.4757	1	-3.202	6.502	Inlier
Ecoli	Ec_PDS000000812.66	SRR23976413	CSP1_v_CSP2	-1.025	1.60675	0	-4.174	2.124	Inlier
Ecoli	Ec_PDS000000812.66	SRR23976413	NCBI_v_CSP1	2.6875	2.75862	2	-2.719	8.094	Inlier
Ecoli	Ec_PDS000000812.66	SRR23976413	NCBI_v_CSP2	1.6625	2.48002	1	-3.198	6.523	Inlier
Ecoli	Ec_PDS000000812.66	SRR23976414	CSP1_v_CSP2	-0.4375	1.40383	0	-3.189	2.314	Inlier
Ecoli	Ec_PDS000000812.66	SRR23976414	NCBI_v_CSP1	2.0875	2.42974	1	-2.675	6.85	Inlier
Ecoli	Ec_PDS000000812.66	SRR23976414	NCBI_v_CSP2	1.65	2.48591	1	-3.222	6.522	Inlier
Ecoli	Ec_PDS000000812.66	SRR23976415	CSP1_v_CSP2	-1.0375	1.59464	0	-4.163	2.088	Inlier
Ecoli	Ec_PDS000000812.66	SRR23976415	NCBI_v_CSP1	2.575	2.57925	2	-2.48	7.63	Inlier
Ecoli	Ec_PDS000000812.66	SRR23976415	NCBI_v_CSP2	1.5375	2.31092	1	-2.992	6.067	Inlier
Ecoli	Ec_PDS000000812.66	SRR23976416	CSP1_v_CSP2	-1.0125	1.55485	0	-4.06	2.035	Inlier
Ecoli	Ec_PDS000000812.66	SRR23976416	NCBI_v_CSP1	2.55	2.50013	2	-2.35	7.45	Inlier
Ecoli	Ec_PDS000000812.66	SRR23976416	NCBI_v_CSP2	1.5375	2.20439	1	-2.783	5.858	Inlier
Ecoli	Ec_PDS000000812.66	SRR24172368	CSP1_v_CSP2	-0.3	1.33502	0	-2.917	2.317	Inlier
Ecoli	Ec_PDS000000812.66	SRR24172368	NCBI_v_CSP1	2.225	2.08658	1	-1.865	6.315	Inlier
Ecoli	Ec_PDS000000812.66	SRR24172368	NCBI_v_CSP2	1.925	2.21488	1	-2.416	6.266	Inlier
Ecoli	Ec_PDS000000812.66	SRR24172369	CSP1_v_CSP2	0.5	1.35011	0	-2.146	3.146	Inlier
Ecoli	Ec_PDS000000812.66	SRR24172369	NCBI_v_CSP1	1.9875	2.39458	1	-2.706	6.681	Inlier
Ecoli	Ec_PDS000000812.66	SRR24172369	NCBI_v_CSP2	2.4875	2.82392	2	-3.047	8.022	Inlier
Ecoli	Ec_PDS000000812.66	SRR24172374	CSP1_v_CSP2	-0.175	1.33857	0	-2.799	2.449	Inlier
Ecoli	Ec_PDS000000812.66	SRR24172374	NCBI_v_CSP1	2.075	2.43277	1	-2.693	6.843	Inlier
Ecoli	Ec_PDS000000812.66	SRR24172374	NCBI_v_CSP2	1.9	2.54876	1	-3.095	6.895	Inlier
Ecoli	Ec_PDS000000812.66	SRR24172375	CSP1_v_CSP2	-0.5625	1.4742	0	-3.452	2.327	Inlier
Ecoli	Ec_PDS000000812.66	SRR24172375	NCBI_v_CSP1	3.5	2.72355	3	-1.838	8.838	Inlier
Ecoli	Ec_PDS000000812.66	SRR24172375	NCBI_v_CSP2	2.9375	2.62579	2	-2.209	8.084	Inlier
Ecoli	Ec_PDS000000812.66	SRR2423594	CSP1_v_CSP2	-0.225	1.77874	-1	-3.711	3.261	Inlier
Ecoli	Ec_PDS000000812.66	SRR2423594	NCBI_v_CSP1	2.025	2.11669	2	-2.124	6.174	Inlier
Ecoli	Ec_PDS000000812.66	SRR2423594	NCBI_v_CSP2	1.8	2.89215	1	-3.869	7.469	Inlier
Ecoli	Ec_PDS000000812.66	SRR24918876	CSP1_v_CSP2	-0.975	1.50925	0	-3.933	1.983	Inlier
Ecoli	Ec_PDS000000812.66	SRR24918876	NCBI_v_CSP1	3.525	2.38123	3	-1.142	8.192	Inlier
Ecoli	Ec_PDS000000812.66	SRR24918876	NCBI_v_CSP2	2.55	2.29419	2	-1.947	7.047	Inlier
Ecoli	Ec_PDS000000812.66	SRR24918878	CSP1_v_CSP2	-1.0125	1.55485	0	-4.06	2.035	Inlier
Ecoli	Ec_PDS000000812.66	SRR24918878	NCBI_v_CSP1	2.6875	2.75862	2	-2.719	8.094	Inlier
Ecoli	Ec_PDS000000812.66	SRR24918878	NCBI_v_CSP2	1.675	2.47404	1	-3.174	6.524	Inlier
Ecoli	Ec_PDS000000812.66	SRR24918879	CSP1_v_CSP2	-1.05	1.59826	0	-4.183	2.083	Inlier
Ecoli	Ec_PDS000000812.66	SRR24918879	NCBI_v_CSP1	3.6625	2.76022	3	-1.747	9.072	Inlier
Ecoli	Ec_PDS000000812.66	SRR24918879	NCBI_v_CSP2	2.6125	2.47772	2	-2.244	7.469	Inlier
Ecoli	Ec_PDS000000812.66	SRR24940074	CSP1_v_CSP2	-1.0375	1.59464	0	-4.163	2.088	Inlier
Ecoli	Ec_PDS000000812.66	SRR24940074	NCBI_v_CSP1	2.65	2.66292	2	-2.569	7.869	Inlier
Ecoli	Ec_PDS000000812.66	SRR24940074	NCBI_v_CSP2	1.6125	2.38929	1	-3.07	6.295	Inlier
Ecoli	Ec_PDS000000812.66	SRR24940075	CSP1_v_CSP2	-1.0375	1.59464	0	-4.163	2.088	Inlier
Ecoli	Ec_PDS000000812.66	SRR24940075	NCBI_v_CSP1	2.6875	2.75862	2	-2.719	8.094	Inlier
Ecoli	Ec_PDS000000812.66	SRR24940075	NCBI_v_CSP2	1.65	2.48591	1	-3.222	6.522	Inlier
Ecoli	Ec_PDS000000812.66	SRR24940086	CSP1_v_CSP2	-1.0375	1.59464	0	-4.163	2.088	Inlier
Ecoli	Ec_PDS000000812.66	SRR24940086	NCBI_v_CSP1	2.6875	2.75862	2	-2.719	8.094	Inlier
Ecoli	Ec_PDS000000812.66	SRR24940086	NCBI_v_CSP2	1.65	2.48591	1	-3.222	6.522	Inlier
Ecoli	Ec_PDS000000812.66	SRR24940087	CSP1_v_CSP2	-1.0375	1.59464	0	-4.163	2.088	Inlier
Ecoli	Ec_PDS000000812.66	SRR24940087	NCBI_v_CSP1	2.6625	2.7372	2	-2.702	8.027	Inlier
Ecoli	Ec_PDS000000812.66	SRR24940087	NCBI_v_CSP2	1.625	2.48731	1	-3.25	6.5	Inlier
Ecoli	Ec_PDS000000812.66	SRR24940088	CSP1_v_CSP2	-2	1.6148	-1	-5.165	1.165	Inlier
Ecoli	Ec_PDS000000812.66	SRR24940088	NCBI_v_CSP1	2.6875	2.75862	2	-2.719	8.094	Inlier
Ecoli	Ec_PDS000000812.66	SRR24940088	NCBI_v_CSP2	0.6875	2.4935	0	-4.2	5.575	Inlier
Ecoli	Ec_PDS000000812.66	SRR24940089	CSP1_v_CSP2	-1.0125	1.61083	0	-4.17	2.145	Inlier
Ecoli	Ec_PDS000000812.66	SRR24940089	NCBI_v_CSP1	2.675	2.72715	2	-2.67	8.02	Inlier
Ecoli	Ec_PDS000000812.66	SRR24940089	NCBI_v_CSP2	1.6625	2.50541	1	-3.248	6.573	Inlier
Ecoli	Ec_PDS000000812.66	SRR24991663	CSP1_v_CSP2	0.45	1.33975	0	-2.176	3.076	Inlier
Ecoli	Ec_PDS000000812.66	SRR24991663	NCBI_v_CSP1	3.6	2.3417	3	-0.99	8.19	Inlier
Ecoli	Ec_PDS000000812.66	SRR24991663	NCBI_v_CSP2	4.05	2.62365	3	-1.092	9.192	Inlier
Ecoli	Ec_PDS000000812.66	SRR24991664	CSP1_v_CSP2	-0.3125	1.17564	0	-2.617	1.992	Inlier
Ecoli	Ec_PDS000000812.66	SRR24991664	NCBI_v_CSP1	2.3125	2.6125	2	-2.808	7.433	Inlier
Ecoli	Ec_PDS000000812.66	SRR24991664	NCBI_v_CSP2	2	2.51074	1	-2.921	6.921	Inlier
Ecoli	Ec_PDS000000812.66	SRR25070265	CSP1_v_CSP2	-1.0125	1.54669	0	-4.044	2.019	Inlier
Ecoli	Ec_PDS000000812.66	SRR25070265	NCBI_v_CSP1	2.9125	2.42453	2	-1.839	7.664	Inlier
Ecoli	Ec_PDS000000812.66	SRR25070265	NCBI_v_CSP2	1.9	2.33086	1	-2.668	6.468	Inlier
Ecoli	Ec_PDS000000812.66	SRR25070266	CSP1_v_CSP2	-0.4375	1.40383	0	-3.189	2.314	Inlier
Ecoli	Ec_PDS000000812.66	SRR25070266	NCBI_v_CSP1	2.0375	2.44143	1	-2.748	6.823	Inlier
Ecoli	Ec_PDS000000812.66	SRR25070266	NCBI_v_CSP2	1.6	2.50367	1	-3.307	6.507	Inlier
Ecoli	Ec_PDS000000812.66	SRR25525679	CSP1_v_CSP2	0.4875	1.44076	0	-2.336	3.311	Inlier
Ecoli	Ec_PDS000000812.66	SRR25525679	NCBI_v_CSP1	2.425	1.76302	2	-1.03	5.88	Inlier
Ecoli	Ec_PDS000000812.66	SRR25525679	NCBI_v_CSP2	2.9125	2.25127	2	-1.5	7.325	Inlier
Ecoli	Ec_PDS000000812.66	SRR25571340	CSP1_v_CSP2	0.8625	1.19856	1	-1.487	3.212	Inlier
Ecoli	Ec_PDS000000812.66	SRR25571340	NCBI_v_CSP1	4.5375	2.05583	4	0.508	8.567	Inlier
Ecoli	Ec_PDS000000812.66	SRR25571340	NCBI_v_CSP2	5.4	2.35786	5	0.779	10.021	Inlier
Ecoli	Ec_PDS000000812.66	SRR26089086	CSP1_v_CSP2	-0.8125	1.56782	-1	-3.885	2.26	Inlier
Ecoli	Ec_PDS000000812.66	SRR26089086	NCBI_v_CSP1	9.125	2.13693	9	4.937	13.313	Inlier
Ecoli	Ec_PDS000000812.66	SRR26089086	NCBI_v_CSP2	8.3125	2.41091	8	3.587	13.038	Inlier
Ecoli	Ec_PDS000000812.66	SRR3033411	CSP1_v_CSP2	-0.2625	1.58907	-1	-3.377	2.852	Inlier
Ecoli	Ec_PDS000000812.66	SRR3033411	NCBI_v_CSP1	6.3	1.76032	6	2.85	9.75	Inlier
Ecoli	Ec_PDS000000812.66	SRR3033411	NCBI_v_CSP2	6.0375	2.04038	5	2.038	10.037	Inlier
Ecoli	Ec_PDS000000812.66	SRR3152802	CSP1_v_CSP2	-2.5625	2.07361	-3	-6.627	1.502	Inlier
Ecoli	Ec_PDS000000812.66	SRR3152802	NCBI_v_CSP1	7.1	1.91331	7	3.35	10.85	Inlier
Ecoli	Ec_PDS000000812.66	SRR3152802	NCBI_v_CSP2	4.5375	2.62386	4	-0.605	9.68	Inlier
Ecoli	Ec_PDS000000812.66	SRR3593428	CSP1_v_CSP2	-0.6625	1.43151	-1	-3.468	2.143	Inlier
Ecoli	Ec_PDS000000812.66	SRR3593428	NCBI_v_CSP1	3.3	1.81694	3	-0.261	6.861	Inlier
Ecoli	Ec_PDS000000812.66	SRR3593428	NCBI_v_CSP2	2.6375	2.05767	2	-1.395	6.67	Inlier
Ecoli	Ec_PDS000000812.66	SRR3957043	CSP1_v_CSP2	0.5125	1.47549	0	-2.379	3.404	Inlier
Ecoli	Ec_PDS000000812.66	SRR3957043	NCBI_v_CSP1	4.7625	1.87754	4.5	1.083	8.442	Inlier
Ecoli	Ec_PDS000000812.66	SRR3957043	NCBI_v_CSP2	5.275	2.31109	4	0.745	9.805	Inlier
Ecoli	Ec_PDS000000812.66	SRR3990966	CSP1_v_CSP2	1.5625	1.36728	2	-1.117	4.242	Inlier
Ecoli	Ec_PDS000000812.66	SRR3990966	NCBI_v_CSP1	2.9625	1.81724	3	-0.599	6.524	Inlier
Ecoli	Ec_PDS000000812.66	SRR3990966	NCBI_v_CSP2	4.525	2.14048	4	0.33	8.72	Inlier
Ecoli	Ec_PDS000000812.66	SRR3996096	CSP1_v_CSP2	-2.8375	1.87889	-3	-6.52	0.845	Inlier
Ecoli	Ec_PDS000000812.66	SRR3996096	NCBI_v_CSP1	3.95	1.99937	4	0.031	7.869	Inlier
Ecoli	Ec_PDS000000812.66	SRR3996096	NCBI_v_CSP2	1.1125	2.62892	0	-4.04	6.265	Inlier
Ecoli	Ec_PDS000000812.66	SRR4015633	CSP1_v_CSP2	-2.025	1.79292	-2	-5.539	1.489	Inlier
Ecoli	Ec_PDS000000812.66	SRR4015633	NCBI_v_CSP1	3.925	1.89453	4	0.212	7.638	Inlier
Ecoli	Ec_PDS000000812.66	SRR4015633	NCBI_v_CSP2	1.9	2.40569	1	-2.815	6.615	Inlier
Ecoli	Ec_PDS000000812.66	SRR4115656	CSP1_v_CSP2	-1.4	1.55572	-2	-4.449	1.649	Inlier
Ecoli	Ec_PDS000000812.66	SRR4115656	NCBI_v_CSP1	4.8375	2.13733	5	0.648	9.027	Inlier
Ecoli	Ec_PDS000000812.66	SRR4115656	NCBI_v_CSP2	3.4375	2.4795	2.5	-1.422	8.297	Inlier
Ecoli	Ec_PDS000000812.66	SRR5004312	CSP1_v_CSP2	-0.925	1.8403	-1	-4.532	2.682	Inlier
Ecoli	Ec_PDS000000812.66	SRR5004312	NCBI_v_CSP1	1.9875	1.96484	2	-1.864	5.839	Inlier
Ecoli	Ec_PDS000000812.66	SRR5004312	NCBI_v_CSP2	1.0625	2.64979	0	-4.131	6.256	Inlier
Ecoli	Ec_PDS000000812.66	SRR5461664	CSP1_v_CSP2	3.95	1.22112	4	1.557	6.343	Inlier
Ecoli	Ec_PDS000000812.66	SRR5461664	NCBI_v_CSP1	0.4	1.71811	0	-2.967	3.767	Inlier
Ecoli	Ec_PDS000000812.66	SRR5461664	NCBI_v_CSP2	4.35	1.91662	4	0.594	8.106	Inlier
Ecoli	Ec_PDS000000812.66	SRR5616358	CSP1_v_CSP2	-0.75	1.34541	-1	-3.387	1.887	Inlier
Ecoli	Ec_PDS000000812.66	SRR5616358	NCBI_v_CSP1	2.175	1.86082	2	-1.472	5.822	Inlier
Ecoli	Ec_PDS000000812.66	SRR5616358	NCBI_v_CSP2	1.425	2.29901	1	-3.081	5.931	Inlier
Ecoli	Ec_PDS000000812.66	SRR6658341	CSP1_v_CSP2	0.2625	1.84695	0	-3.357	3.882	Inlier
Ecoli	Ec_PDS000000812.66	SRR6658341	NCBI_v_CSP1	3.625	1.66403	3	0.364	6.886	Inlier
Ecoli	Ec_PDS000000812.66	SRR6658341	NCBI_v_CSP2	3.8875	2.27809	3	-0.577	8.352	Inlier
Ecoli	Ec_PDS000000812.66	SRR6949560	CSP1_v_CSP2	1.6125	1.40967	1	-1.15	4.375	Inlier
Ecoli	Ec_PDS000000812.66	SRR6949560	NCBI_v_CSP1	2.05	1.76391	2	-1.407	5.507	Inlier
Ecoli	Ec_PDS000000812.66	SRR6949560	NCBI_v_CSP2	3.6625	2.14029	3	-0.532	7.857	Inlier
Ecoli	Ec_PDS000000812.66	SRR7100943	CSP1_v_CSP2	0.4875	1.40518	0	-2.267	3.242	Inlier
Ecoli	Ec_PDS000000812.66	SRR7100943	NCBI_v_CSP1	5.0375	1.92547	5	1.264	8.811	Inlier
Ecoli	Ec_PDS000000812.66	SRR7100943	NCBI_v_CSP2	5.525	1.95503	5	1.693	9.357	Inlier
Ecoli	Ec_PDS000000812.66	SRR7166301	CSP1_v_CSP2	-2.1	1.6273	-2	-5.289	1.089	Inlier
Ecoli	Ec_PDS000000812.66	SRR7166301	NCBI_v_CSP1	4.85	1.90336	5	1.119	8.581	Inlier
Ecoli	Ec_PDS000000812.66	SRR7166301	NCBI_v_CSP2	2.75	2.37338	2	-1.902	7.402	Inlier
Ecoli	Ec_PDS000000812.66	SRR7280442	CSP1_v_CSP2	0.6375	1.56903	0.5	-2.438	3.713	Inlier
Ecoli	Ec_PDS000000812.66	SRR7280442	NCBI_v_CSP1	3.4875	1.66112	3	0.232	6.743	Inlier
Ecoli	Ec_PDS000000812.66	SRR7280442	NCBI_v_CSP2	4.125	2.06462	3	0.078	8.172	Inlier
Ecoli	Ec_PDS000000812.66	SRR7641435	CSP1_v_CSP2	-1.525	1.46672	-2	-4.4	1.35	Inlier
Ecoli	Ec_PDS000000812.66	SRR7641435	NCBI_v_CSP1	9.1625	2.24704	9	4.758	13.567	Inlier
Ecoli	Ec_PDS000000812.66	SRR7641435	NCBI_v_CSP2	7.6375	2.59622	7	2.549	12.726	Inlier
Ecoli	Ec_PDS000000812.66	SRR7797528	CSP1_v_CSP2	-0.15	1.6234	0	-3.332	3.032	Inlier
Ecoli	Ec_PDS000000812.66	SRR7797528	NCBI_v_CSP1	6.8	2.00253	7	2.875	10.725	Inlier
Ecoli	Ec_PDS000000812.66	SRR7797528	NCBI_v_CSP2	6.65	2.35517	6	2.034	11.266	Inlier
Ecoli	Ec_PDS000000812.66	SRR7798118	CSP1_v_CSP2	-0.5125	2.19316	-1	-4.811	3.786	Inlier
Ecoli	Ec_PDS000000812.66	SRR7798118	NCBI_v_CSP1	3.625	1.81676	3	0.064	7.186	Inlier
Ecoli	Ec_PDS000000812.66	SRR7798118	NCBI_v_CSP2	3.1125	2.71421	3	-2.207	8.432	Inlier
Ecoli	Ec_PDS000000812.66	SRR8171133	CSP1_v_CSP2	1.125	1.97051	1	-2.737	4.987	Inlier
Ecoli	Ec_PDS000000812.66	SRR8171133	NCBI_v_CSP1	6.725	1.82788	6	3.142	10.308	Inlier
Ecoli	Ec_PDS000000812.66	SRR8171133	NCBI_v_CSP2	7.85	2.64862	7	2.659	13.041	Inlier
Ecoli	Ec_PDS000000812.66	SRR8176474	CSP1_v_CSP2	0.3875	1.33591	0	-2.231	3.006	Inlier
Ecoli	Ec_PDS000000812.66	SRR8176474	NCBI_v_CSP1	3.0375	1.73893	3	-0.371	6.446	Inlier
Ecoli	Ec_PDS000000812.66	SRR8176474	NCBI_v_CSP2	3.425	2.23196	3	-0.95	7.8	Inlier
Ecoli	Ec_PDS000000812.66	SRR8575512	CSP1_v_CSP2	1.6375	1.35239	2	-1.013	4.288	Inlier
Ecoli	Ec_PDS000000812.66	SRR8575512	NCBI_v_CSP1	4.625	1.88515	4	0.93	8.32	Inlier
Ecoli	Ec_PDS000000812.66	SRR8575512	NCBI_v_CSP2	6.2625	2.27114	6	1.811	10.714	Inlier
Ecoli	Ec_PDS000000812.66	SRR9588888	CSP1_v_CSP2	-1.575	1.38505	-2	-4.29	1.14	Inlier
Ecoli	Ec_PDS000000812.66	SRR9588888	NCBI_v_CSP1	4.975	1.82094	5	1.406	8.544	Inlier
Ecoli	Ec_PDS000000812.66	SRR9588888	NCBI_v_CSP2	3.4	2.20242	3	-0.917	7.717	Inlier
Ecoli	Ec_PDS000001063.100	SRR10026537	CSP1_v_CSP2	-1.12745	1.48038	-1	-4.029	1.774	Inlier
Ecoli	Ec_PDS000001063.100	SRR10026537	NCBI_v_CSP1	2.79412	2.30942	3	-1.732	7.321	Inlier
Ecoli	Ec_PDS000001063.100	SRR10026537	NCBI_v_CSP2	1.66667	2.12171	2	-2.492	5.825	Inlier
Ecoli	Ec_PDS000001063.100	SRR10075455	CSP1_v_CSP2	-2.11765	1.54979	-2	-5.155	0.92	Inlier
Ecoli	Ec_PDS000001063.100	SRR10075455	NCBI_v_CSP1	4.67647	2.1395	4	0.483	8.87	Inlier
Ecoli	Ec_PDS000001063.100	SRR10075455	NCBI_v_CSP2	2.55882	1.96793	3	-1.298	6.416	Inlier
Ecoli	Ec_PDS000001063.100	SRR10212210	CSP1_v_CSP2	1.7451	1.5523	2	-1.297	4.788	Inlier
Ecoli	Ec_PDS000001063.100	SRR10212210	NCBI_v_CSP1	0.637255	2.18813	1	-3.651	4.926	Inlier
Ecoli	Ec_PDS000001063.100	SRR10212210	NCBI_v_CSP2	2.38235	2.1063	2	-1.746	6.511	Inlier
Ecoli	Ec_PDS000001063.100	SRR10212229	CSP1_v_CSP2	-1.2549	1.46027	-1	-4.117	1.607	Inlier
Ecoli	Ec_PDS000001063.100	SRR10212229	NCBI_v_CSP1	2.0098	2.22272	2	-2.347	6.366	Inlier
Ecoli	Ec_PDS000001063.100	SRR10212229	NCBI_v_CSP2	0.754902	2.08453	1	-3.331	4.841	Inlier
Ecoli	Ec_PDS000001063.100	SRR10225371	CSP1_v_CSP2	0.539216	1.28719	1	-1.984	3.062	Inlier
Ecoli	Ec_PDS000001063.100	SRR10225371	NCBI_v_CSP1	3.18627	2.22822	3	-1.181	7.554	Inlier
Ecoli	Ec_PDS000001063.100	SRR10225371	NCBI_v_CSP2	3.72549	2.19431	4	-0.575	8.026	Inlier
Ecoli	Ec_PDS000001063.100	SRR10267315	CSP1_v_CSP2	-0.0882353	1.39378	0	-2.82	2.644	Inlier
Ecoli	Ec_PDS000001063.100	SRR10267315	NCBI_v_CSP1	4.9902	2.12712	5	0.821	9.159	Inlier
Ecoli	Ec_PDS000001063.100	SRR10267315	NCBI_v_CSP2	4.90196	2.09908	5	0.788	9.016	Inlier
Ecoli	Ec_PDS000001063.100	SRR10320572	CSP1_v_CSP2	-1.20588	1.39545	-1	-3.941	1.529	Inlier
Ecoli	Ec_PDS000001063.100	SRR10320572	NCBI_v_CSP1	4.77451	2.42474	5	0.022	9.527	Inlier
Ecoli	Ec_PDS000001063.100	SRR10320572	NCBI_v_CSP2	3.56863	2.24495	3	-0.831	7.969	Inlier
Ecoli	Ec_PDS000001063.100	SRR10429381	CSP1_v_CSP2	0.803922	1.32036	1	-1.784	3.392	Inlier
Ecoli	Ec_PDS000001063.100	SRR10429381	NCBI_v_CSP1	1.15686	2.23715	1	-3.228	5.542	Inlier
Ecoli	Ec_PDS000001063.100	SRR10429381	NCBI_v_CSP2	1.96078	2.11979	2	-2.194	6.115	Inlier
Ecoli	Ec_PDS000001063.100	SRR11925988	CSP1_v_CSP2	-0.22549	1.51499	0	-3.195	2.744	Inlier
Ecoli	Ec_PDS000001063.100	SRR11925988	NCBI_v_CSP1	4.26471	2.08686	4	0.175	8.355	Inlier
Ecoli	Ec_PDS000001063.100	SRR11925988	NCBI_v_CSP2	4.03922	1.93928	4	0.238	7.84	Inlier
Ecoli	Ec_PDS000001063.100	SRR12158190	CSP1_v_CSP2	-2.29412	1.41833	-2	-5.074	0.486	Inlier
Ecoli	Ec_PDS000001063.100	SRR12158190	NCBI_v_CSP1	3.83333	2.26503	4	-0.606	8.273	Inlier
Ecoli	Ec_PDS000001063.100	SRR12158190	NCBI_v_CSP2	1.53922	2.16485	1.5	-2.704	5.782	Inlier
Ecoli	Ec_PDS000001063.100	SRR12199217	CSP1_v_CSP2	-3.91176	1.51627	-4	-6.884	-0.94	Inlier
Ecoli	Ec_PDS000001063.100	SRR12199217	NCBI_v_CSP1	4.82353	2.02172	5	0.861	8.786	Inlier
Ecoli	Ec_PDS000001063.100	SRR12199217	NCBI_v_CSP2	0.911765	2.24315	1	-3.485	5.308	Inlier
Ecoli	Ec_PDS000001063.100	SRR12319136	CSP1_v_CSP2	-0.970588	1.49226	-1	-3.895	1.954	Inlier
Ecoli	Ec_PDS000001063.100	SRR12319136	NCBI_v_CSP1	2.72549	2.20331	3	-1.593	7.044	Inlier
Ecoli	Ec_PDS000001063.100	SRR12319136	NCBI_v_CSP2	1.7549	2.03161	2	-2.227	5.737	Inlier
Ecoli	Ec_PDS000001063.100	SRR12319333	CSP1_v_CSP2	-0.156863	1.28005	0	-2.666	2.352	Inlier
Ecoli	Ec_PDS000001063.100	SRR12319333	NCBI_v_CSP1	4.08824	2.22987	4	-0.282	8.459	Inlier
Ecoli	Ec_PDS000001063.100	SRR12319333	NCBI_v_CSP2	3.93137	2.0646	4	-0.115	7.978	Inlier
Ecoli	Ec_PDS000001063.100	SRR12341380	CSP1_v_CSP2	-0.441176	1.36123	0	-3.109	2.227	Inlier
Ecoli	Ec_PDS000001063.100	SRR12341380	NCBI_v_CSP1	5.98039	2.26458	6	1.542	10.419	Inlier
Ecoli	Ec_PDS000001063.100	SRR12341380	NCBI_v_CSP2	5.53922	2.29365	6	1.044	10.035	Inlier
Ecoli	Ec_PDS000001063.100	SRR12362247	CSP1_v_CSP2	-0.0588235	1.36304	0	-2.73	2.613	Inlier
Ecoli	Ec_PDS000001063.100	SRR12362247	NCBI_v_CSP1	2.7549	2.33542	2	-1.822	7.332	Inlier
Ecoli	Ec_PDS000001063.100	SRR12362247	NCBI_v_CSP2	2.69608	2.1004	2.5	-1.421	6.813	Inlier
Ecoli	Ec_PDS000001063.100	SRR12436582	CSP1_v_CSP2	1.59804	1.35164	2	-1.051	4.247	Inlier
Ecoli	Ec_PDS000001063.100	SRR12436582	NCBI_v_CSP1	1.85294	2.20888	2	-2.476	6.182	Inlier
Ecoli	Ec_PDS000001063.100	SRR12436582	NCBI_v_CSP2	3.45098	2.22331	4	-0.907	7.809	Inlier
Ecoli	Ec_PDS000001063.100	SRR12463018	CSP1_v_CSP2	-2.39216	1.39417	-2	-5.125	0.34	Inlier
Ecoli	Ec_PDS000001063.100	SRR12463018	NCBI_v_CSP1	4.06863	2.20378	4	-0.251	8.388	Inlier
Ecoli	Ec_PDS000001063.100	SRR12463018	NCBI_v_CSP2	1.67647	2.16251	1	-2.562	5.915	Inlier
Ecoli	Ec_PDS000001063.100	SRR12734188	CSP1_v_CSP2	0.72549	1.49691	1	-2.208	3.659	Inlier
Ecoli	Ec_PDS000001063.100	SRR12734188	NCBI_v_CSP1	-0.990196	2.18226	-1	-5.267	3.287	Inlier
Ecoli	Ec_PDS000001063.100	SRR12734188	NCBI_v_CSP2	-0.264706	2.11981	-1	-4.419	3.89	Inlier
Ecoli	Ec_PDS000001063.100	SRR12743336	CSP1_v_CSP2	-1.2549	1.52657	-1	-4.247	1.737	Inlier
Ecoli	Ec_PDS000001063.100	SRR12743336	NCBI_v_CSP1	2.86275	2.30385	3	-1.653	7.378	Inlier
Ecoli	Ec_PDS000001063.100	SRR12743336	NCBI_v_CSP2	1.60784	1.96079	1	-2.235	5.451	Inlier
Ecoli	Ec_PDS000001063.100	SRR12789746	CSP1_v_CSP2	-0.176471	1.45161	0	-3.022	2.669	Inlier
Ecoli	Ec_PDS000001063.100	SRR12789746	NCBI_v_CSP1	2.63725	2.28551	2	-1.842	7.117	Inlier
Ecoli	Ec_PDS000001063.100	SRR12789746	NCBI_v_CSP2	2.46078	2.03762	2	-1.533	6.454	Inlier
Ecoli	Ec_PDS000001063.100	SRR13088106	CSP1_v_CSP2	-0.303922	1.35551	0	-2.961	2.353	Inlier
Ecoli	Ec_PDS000001063.100	SRR13088106	NCBI_v_CSP1	2.42157	2.09401	2	-1.683	6.526	Inlier
Ecoli	Ec_PDS000001063.100	SRR13088106	NCBI_v_CSP2	2.11765	2.01132	2	-1.824	6.06	Inlier
Ecoli	Ec_PDS000001063.100	SRR13273976	CSP1_v_CSP2	-2.13725	1.39333	-2	-4.868	0.594	Inlier
Ecoli	Ec_PDS000001063.100	SRR13273976	NCBI_v_CSP1	4.0098	2.07051	4	-0.048	8.068	Inlier
Ecoli	Ec_PDS000001063.100	SRR13273976	NCBI_v_CSP2	1.87255	1.98345	2	-2.015	5.76	Inlier
Ecoli	Ec_PDS000001063.100	SRR13415132	CSP1_v_CSP2	-0.862745	1.44906	-1	-3.703	1.977	Inlier
Ecoli	Ec_PDS000001063.100	SRR13415132	NCBI_v_CSP1	3.28431	2.19981	3	-1.027	7.596	Inlier
Ecoli	Ec_PDS000001063.100	SRR13415132	NCBI_v_CSP2	2.42157	2.05584	2	-1.608	6.451	Inlier
Ecoli	Ec_PDS000001063.100	SRR13703262	CSP1_v_CSP2	-2.32353	1.33618	-2	-4.942	0.295	Inlier
Ecoli	Ec_PDS000001063.100	SRR13703262	NCBI_v_CSP1	2.67647	2.15334	2	-1.544	6.897	Inlier
Ecoli	Ec_PDS000001063.100	SRR13703262	NCBI_v_CSP2	0.352941	1.99825	0	-3.564	4.269	Inlier
Ecoli	Ec_PDS000001063.100	SRR13933751	CSP1_v_CSP2	1.77451	1.41356	2	-0.996	4.545	Inlier
Ecoli	Ec_PDS000001063.100	SRR13933751	NCBI_v_CSP1	-0.186275	2.18786	0	-4.474	4.102	Inlier
Ecoli	Ec_PDS000001063.100	SRR13933751	NCBI_v_CSP2	1.58824	2.11245	1	-2.552	5.729	Inlier
Ecoli	Ec_PDS000001063.100	SRR13934560	CSP1_v_CSP2	0.794118	1.36678	1	-1.885	3.473	Inlier
Ecoli	Ec_PDS000001063.100	SRR13934560	NCBI_v_CSP1	4.92157	2.18766	5	0.634	9.209	Inlier
Ecoli	Ec_PDS000001063.100	SRR13934560	NCBI_v_CSP2	5.71569	2.05555	6	1.687	9.744	Inlier
Ecoli	Ec_PDS000001063.100	SRR14579928	CSP1_v_CSP2	0.745098	1.38368	1	-1.967	3.457	Inlier
Ecoli	Ec_PDS000001063.100	SRR14579928	NCBI_v_CSP1	3.87255	2.43193	4	-0.894	8.639	Inlier
Ecoli	Ec_PDS000001063.100	SRR14579928	NCBI_v_CSP2	4.61765	2.18928	5	0.327	8.909	Inlier
Ecoli	Ec_PDS000001063.100	SRR14750080	CSP1_v_CSP2	0.647059	1.34714	1	-1.993	3.287	Inlier
Ecoli	Ec_PDS000001063.100	SRR14750080	NCBI_v_CSP1	0.754902	2.04618	1	-3.256	4.765	Inlier
Ecoli	Ec_PDS000001063.100	SRR14750080	NCBI_v_CSP2	1.40196	2.14919	1	-2.81	5.614	Inlier
Ecoli	Ec_PDS000001063.100	SRR15248640	CSP1_v_CSP2	-1.32353	1.33618	-1	-3.942	1.295	Inlier
Ecoli	Ec_PDS000001063.100	SRR15248640	NCBI_v_CSP1	3.71569	2.33517	4	-0.861	8.293	Inlier
Ecoli	Ec_PDS000001063.100	SRR15248640	NCBI_v_CSP2	2.39216	2.08795	2	-1.7	6.484	Inlier
Ecoli	Ec_PDS000001063.100	SRR15271135	CSP1_v_CSP2	-2.01961	1.58571	-2	-5.128	1.088	Inlier
Ecoli	Ec_PDS000001063.100	SRR15271135	NCBI_v_CSP1	6.4902	2.0525	6	2.467	10.513	Inlier
Ecoli	Ec_PDS000001063.100	SRR15271135	NCBI_v_CSP2	4.47059	2.36604	4	-0.167	9.108	Inlier
Ecoli	Ec_PDS000001063.100	SRR15328887	CSP1_v_CSP2	-1.14706	1.54405	-1	-4.173	1.879	Inlier
Ecoli	Ec_PDS000001063.100	SRR15328887	NCBI_v_CSP1	6.02941	2.227	6	1.665	10.394	Inlier
Ecoli	Ec_PDS000001063.100	SRR15328887	NCBI_v_CSP2	4.88235	2.15854	5	0.652	9.113	Inlier
Ecoli	Ec_PDS000001063.100	SRR15566970	CSP1_v_CSP2	0.833333	1.40073	1	-1.912	3.579	Inlier
Ecoli	Ec_PDS000001063.100	SRR15566970	NCBI_v_CSP1	4.76471	2.54144	5	-0.216	9.746	Inlier
Ecoli	Ec_PDS000001063.100	SRR15566970	NCBI_v_CSP2	5.59804	2.2658	5	1.157	10.039	Inlier
Ecoli	Ec_PDS000001063.100	SRR16014036	CSP1_v_CSP2	-2.23529	1.55542	-2	-5.284	0.813	Inlier
Ecoli	Ec_PDS000001063.100	SRR16014036	NCBI_v_CSP1	5.0098	2.20932	5	0.68	9.34	Inlier
Ecoli	Ec_PDS000001063.100	SRR16014036	NCBI_v_CSP2	2.77451	2.0677	3	-1.278	6.827	Inlier
Ecoli	Ec_PDS000001063.100	SRR16597201	CSP1_v_CSP2	-1.9902	1.73773	-2	-5.396	1.416	Inlier
Ecoli	Ec_PDS000001063.100	SRR16597201	NCBI_v_CSP1	0.372549	1.98968	0.5	-3.527	4.272	Inlier
Ecoli	Ec_PDS000001063.100	SRR16597201	NCBI_v_CSP2	-1.61765	2.23848	-2	-6.005	2.77	Inlier
Ecoli	Ec_PDS000001063.100	SRR17008503	CSP1_v_CSP2	-3.23529	1.31387	-3	-5.81	-0.66	Inlier
Ecoli	Ec_PDS000001063.100	SRR17008503	NCBI_v_CSP1	5.66667	2.33498	6	1.09	10.243	Inlier
Ecoli	Ec_PDS000001063.100	SRR17008503	NCBI_v_CSP2	2.43137	2.22279	2	-1.925	6.788	Inlier
Ecoli	Ec_PDS000001063.100	SRR17066667	CSP1_v_CSP2	-0.313725	1.37862	0	-3.016	2.388	Inlier
Ecoli	Ec_PDS000001063.100	SRR17066667	NCBI_v_CSP1	2.44118	2.01761	2	-1.513	6.396	Inlier
Ecoli	Ec_PDS000001063.100	SRR17066667	NCBI_v_CSP2	2.12745	1.95327	2	-1.701	5.956	Inlier
Ecoli	Ec_PDS000001063.100	SRR17219318	CSP1_v_CSP2	-0.294118	1.30943	0	-2.861	2.272	Inlier
Ecoli	Ec_PDS000001063.100	SRR17219318	NCBI_v_CSP1	2.09804	2.09908	2	-2.016	6.212	Inlier
Ecoli	Ec_PDS000001063.100	SRR17219318	NCBI_v_CSP2	1.80392	2.03941	2	-2.193	5.801	Inlier
Ecoli	Ec_PDS000001063.100	SRR19149298	CSP1_v_CSP2	-2.15686	1.33309	-2	-4.77	0.456	Inlier
Ecoli	Ec_PDS000001063.100	SRR19149298	NCBI_v_CSP1	5.7549	2.28398	6	1.278	10.231	Inlier
Ecoli	Ec_PDS000001063.100	SRR19149298	NCBI_v_CSP2	3.59804	2.19928	4	-0.712	7.909	Inlier
Ecoli	Ec_PDS000001063.100	SRR19512993	CSP1_v_CSP2	-2.16667	1.34299	-2	-4.799	0.466	Inlier
Ecoli	Ec_PDS000001063.100	SRR19512993	NCBI_v_CSP1	5.2549	2.28073	6	0.785	9.725	Inlier
Ecoli	Ec_PDS000001063.100	SRR19512993	NCBI_v_CSP2	3.08824	2.21204	3	-1.247	7.424	Inlier
Ecoli	Ec_PDS000001063.100	SRR20020655	CSP1_v_CSP2	-1.21569	1.46664	-1	-4.09	1.659	Inlier
Ecoli	Ec_PDS000001063.100	SRR20020655	NCBI_v_CSP1	3.82353	2.27519	4	-0.636	8.283	Inlier
Ecoli	Ec_PDS000001063.100	SRR20020655	NCBI_v_CSP2	2.60784	2.29574	2	-1.892	7.107	Inlier
Ecoli	Ec_PDS000001063.100	SRR20281345	CSP1_v_CSP2	-1.09804	1.51892	-1	-4.075	1.879	Inlier
Ecoli	Ec_PDS000001063.100	SRR20281345	NCBI_v_CSP1	3.15686	2.19245	3	-1.14	7.454	Inlier
Ecoli	Ec_PDS000001063.100	SRR20281345	NCBI_v_CSP2	2.05882	2.2943	2	-2.438	6.556	Inlier
Ecoli	Ec_PDS000001063.100	SRR20633774	CSP1_v_CSP2	-0.215686	1.40457	0	-2.969	2.537	Inlier
Ecoli	Ec_PDS000001063.100	SRR20633774	NCBI_v_CSP1	5.15686	3.01069	6	-0.744	11.058	Inlier
Ecoli	Ec_PDS000001063.100	SRR20633774	NCBI_v_CSP2	4.94118	2.94781	5	-0.836	10.719	Inlier
Ecoli	Ec_PDS000001063.100	SRR21230156	CSP1_v_CSP2	-0.284314	1.45137	0	-3.129	2.56	Inlier
Ecoli	Ec_PDS000001063.100	SRR21230156	NCBI_v_CSP1	2.82353	2.19996	3	-1.488	7.135	Inlier
Ecoli	Ec_PDS000001063.100	SRR21230156	NCBI_v_CSP2	2.53922	2.11862	2	-1.613	6.692	Inlier
Ecoli	Ec_PDS000001063.100	SRR21230159	CSP1_v_CSP2	-0.294118	1.45281	0	-3.142	2.553	Inlier
Ecoli	Ec_PDS000001063.100	SRR21230159	NCBI_v_CSP1	1.96078	2.1842	2	-2.32	6.242	Inlier
Ecoli	Ec_PDS000001063.100	SRR21230159	NCBI_v_CSP2	1.66667	2.14953	2	-2.546	5.88	Inlier
Ecoli	Ec_PDS000001063.100	SRR21628555	CSP1_v_CSP2	1.23529	1.61169	1	-1.924	4.394	Inlier
Ecoli	Ec_PDS000001063.100	SRR21628555	NCBI_v_CSP1	3.12745	2.08565	3	-0.96	7.215	Inlier
Ecoli	Ec_PDS000001063.100	SRR21628555	NCBI_v_CSP2	4.36275	1.97904	4	0.484	8.242	Inlier
Ecoli	Ec_PDS000001063.100	SRR21663687	CSP1_v_CSP2	-0.460784	1.35465	0	-3.116	2.194	Inlier
Ecoli	Ec_PDS000001063.100	SRR21663687	NCBI_v_CSP1	1.10784	2.17505	1	-3.155	5.371	Inlier
Ecoli	Ec_PDS000001063.100	SRR21663687	NCBI_v_CSP2	0.647059	2.06646	0	-3.403	4.697	Inlier
Ecoli	Ec_PDS000001063.100	SRR21815014	CSP1_v_CSP2	0.0196078	1.50892	0	-2.938	2.977	Inlier
Ecoli	Ec_PDS000001063.100	SRR21815014	NCBI_v_CSP1	0.107843	2.28602	0	-4.373	4.588	Inlier
Ecoli	Ec_PDS000001063.100	SRR21815014	NCBI_v_CSP2	0.127451	2.29796	0	-4.376	4.631	Inlier
Ecoli	Ec_PDS000001063.100	SRR22283114	CSP1_v_CSP2	-1.60784	1.47693	-2	-4.503	1.287	Inlier
Ecoli	Ec_PDS000001063.100	SRR22283114	NCBI_v_CSP1	5.16667	2.16673	5	0.92	9.413	Inlier
Ecoli	Ec_PDS000001063.100	SRR22283114	NCBI_v_CSP2	3.55882	2.08993	3	-0.537	7.655	Inlier
Ecoli	Ec_PDS000001063.100	SRR22444573	CSP1_v_CSP2	0.705882	1.40429	1	-2.046	3.458	Inlier
Ecoli	Ec_PDS000001063.100	SRR22444573	NCBI_v_CSP1	1.15686	2.15142	1	-3.06	5.374	Inlier
Ecoli	Ec_PDS000001063.100	SRR22444573	NCBI_v_CSP2	1.86275	2.1343	2	-2.32	6.046	Inlier
Ecoli	Ec_PDS000001063.100	SRR22845498	CSP1_v_CSP2	-1.97059	1.59489	-2	-5.097	1.155	Inlier
Ecoli	Ec_PDS000001063.100	SRR22845498	NCBI_v_CSP1	5.51961	2.25911	6	1.092	9.947	Inlier
Ecoli	Ec_PDS000001063.100	SRR22845498	NCBI_v_CSP2	3.54902	2.39069	3	-1.137	8.235	Inlier
Ecoli	Ec_PDS000001063.100	SRR24119957	CSP1_v_CSP2	0.607843	1.28323	1	-1.907	3.123	Inlier
Ecoli	Ec_PDS000001063.100	SRR24119957	NCBI_v_CSP1	2.41176	2.21763	2	-1.935	6.758	Inlier
Ecoli	Ec_PDS000001063.100	SRR24119957	NCBI_v_CSP2	3.01961	2.14329	3	-1.181	7.22	Inlier
Ecoli	Ec_PDS000001063.100	SRR2415848	CSP1_v_CSP2	-1.2549	1.43979	-1	-4.077	1.567	Inlier
Ecoli	Ec_PDS000001063.100	SRR2415848	NCBI_v_CSP1	1.72549	2.16707	2	-2.522	5.973	Inlier
Ecoli	Ec_PDS000001063.100	SRR2415848	NCBI_v_CSP2	0.470588	2.04749	0	-3.542	4.484	Inlier
Ecoli	Ec_PDS000001063.100	SRR2415851	CSP1_v_CSP2	-0.382353	1.5224	0	-3.366	2.601	Inlier
Ecoli	Ec_PDS000001063.100	SRR2415851	NCBI_v_CSP1	3.2451	2.35652	3	-1.374	7.864	Inlier
Ecoli	Ec_PDS000001063.100	SRR2415851	NCBI_v_CSP2	2.86275	2.27791	3	-1.602	7.327	Inlier
Ecoli	Ec_PDS000001063.100	SRR24363181	CSP1_v_CSP2	0.127451	1.58378	0	-2.977	3.232	Inlier
Ecoli	Ec_PDS000001063.100	SRR24363181	NCBI_v_CSP1	1.68627	2.16626	1.5	-2.56	5.932	Inlier
Ecoli	Ec_PDS000001063.100	SRR24363181	NCBI_v_CSP2	1.81373	1.98375	2	-2.074	5.702	Inlier
Ecoli	Ec_PDS000001063.100	SRR24917890	CSP1_v_CSP2	-1.88235	1.54339	-2	-4.907	1.143	Inlier
Ecoli	Ec_PDS000001063.100	SRR24917890	NCBI_v_CSP1	1.94118	2.21973	2	-2.409	6.292	Inlier
Ecoli	Ec_PDS000001063.100	SRR24917890	NCBI_v_CSP2	0.0588235	2.50474	-1	-4.85	4.968	Inlier
Ecoli	Ec_PDS000001063.100	SRR25193803	CSP1_v_CSP2	-1.27451	1.48362	-1	-4.182	1.633	Inlier
Ecoli	Ec_PDS000001063.100	SRR25193803	NCBI_v_CSP1	2.95098	2.20879	3	-1.378	7.28	Inlier
Ecoli	Ec_PDS000001063.100	SRR25193803	NCBI_v_CSP2	1.67647	2.13487	1.5	-2.508	5.861	Inlier
Ecoli	Ec_PDS000001063.100	SRR25253155	CSP1_v_CSP2	-0.421569	1.38904	0	-3.144	2.301	Inlier
Ecoli	Ec_PDS000001063.100	SRR25253155	NCBI_v_CSP1	1.97059	2.16843	2	-2.279	6.221	Inlier
Ecoli	Ec_PDS000001063.100	SRR25253155	NCBI_v_CSP2	1.54902	2.06156	1	-2.492	5.59	Inlier
Ecoli	Ec_PDS000001063.100	SRR25339263	CSP1_v_CSP2	0.176471	1.37453	0	-2.518	2.871	Inlier
Ecoli	Ec_PDS000001063.100	SRR25339263	NCBI_v_CSP1	2.07843	2.09519	2	-2.028	6.185	Inlier
Ecoli	Ec_PDS000001063.100	SRR25339263	NCBI_v_CSP2	2.2549	1.88105	2	-1.432	5.942	Inlier
Ecoli	Ec_PDS000001063.100	SRR25404277	CSP1_v_CSP2	-1.40196	1.43685	-1	-4.218	1.414	Inlier
Ecoli	Ec_PDS000001063.100	SRR25404277	NCBI_v_CSP1	3.37255	2.31192	3	-1.159	7.904	Inlier
Ecoli	Ec_PDS000001063.100	SRR25404277	NCBI_v_CSP2	1.97059	2.15009	2	-2.244	6.185	Inlier
Ecoli	Ec_PDS000001063.100	SRR25419337	CSP1_v_CSP2	0.588235	1.40968	1	-2.175	3.351	Inlier
Ecoli	Ec_PDS000001063.100	SRR25419337	NCBI_v_CSP1	6.67647	2.37212	6.5	2.027	11.326	Inlier
Ecoli	Ec_PDS000001063.100	SRR25419337	NCBI_v_CSP2	7.26471	2.35438	7	2.65	11.879	Inlier
Ecoli	Ec_PDS000001063.100	SRR25445922	CSP1_v_CSP2	-0.0784314	1.46027	0	-2.941	2.784	Inlier
Ecoli	Ec_PDS000001063.100	SRR25445922	NCBI_v_CSP1	3.84314	2.20596	4	-0.48	8.167	Inlier
Ecoli	Ec_PDS000001063.100	SRR25445922	NCBI_v_CSP2	3.76471	2.2034	4	-0.554	8.083	Inlier
Ecoli	Ec_PDS000001063.100	SRR2550013	CSP1_v_CSP2	-0.107843	1.41356	0	-2.878	2.663	Inlier
Ecoli	Ec_PDS000001063.100	SRR2550013	NCBI_v_CSP1	4.10784	2.37106	4	-0.539	8.755	Inlier
Ecoli	Ec_PDS000001063.100	SRR2550013	NCBI_v_CSP2	4	2.14338	4	-0.201	8.201	Inlier
Ecoli	Ec_PDS000001063.100	SRR25658967	CSP1_v_CSP2	0.0196078	1.40706	0	-2.738	2.777	Inlier
Ecoli	Ec_PDS000001063.100	SRR25658967	NCBI_v_CSP1	2.4902	2.02335	2	-1.476	6.456	Inlier
Ecoli	Ec_PDS000001063.100	SRR25658967	NCBI_v_CSP2	2.5098	1.78966	2	-0.998	6.017	Inlier
Ecoli	Ec_PDS000001063.100	SRR25744548	CSP1_v_CSP2	0.519608	1.34039	1	-2.108	3.147	Inlier
Ecoli	Ec_PDS000001063.100	SRR25744548	NCBI_v_CSP1	2.38235	2.26048	2	-2.048	6.813	Inlier
Ecoli	Ec_PDS000001063.100	SRR25744548	NCBI_v_CSP2	2.90196	2.11318	3	-1.24	7.044	Inlier
Ecoli	Ec_PDS000001063.100	SRR25745518	CSP1_v_CSP2	-2	1.4212	-2	-4.785	0.785	Inlier
Ecoli	Ec_PDS000001063.100	SRR25745518	NCBI_v_CSP1	4.02941	2.25352	4	-0.387	8.446	Inlier
Ecoli	Ec_PDS000001063.100	SRR25745518	NCBI_v_CSP2	2.02941	2.11293	2	-2.112	6.171	Inlier
Ecoli	Ec_PDS000001063.100	SRR25761512	CSP1_v_CSP2	0.568627	1.26264	1	-1.906	3.043	Inlier
Ecoli	Ec_PDS000001063.100	SRR25761512	NCBI_v_CSP1	3.15686	2.24157	3	-1.237	7.55	Inlier
Ecoli	Ec_PDS000001063.100	SRR25761512	NCBI_v_CSP2	3.72549	2.11153	3	-0.413	7.864	Inlier
Ecoli	Ec_PDS000001063.100	SRR25925678	CSP1_v_CSP2	-1.18627	1.35508	-1	-3.842	1.47	Inlier
Ecoli	Ec_PDS000001063.100	SRR25925678	NCBI_v_CSP1	1.40196	2.05016	1	-2.616	5.42	Inlier
Ecoli	Ec_PDS000001063.100	SRR25925678	NCBI_v_CSP2	0.215686	1.94797	0	-3.602	4.034	Inlier
Ecoli	Ec_PDS000001063.100	SRR26061260	CSP1_v_CSP2	-2.93137	1.47762	-3	-5.827	-0.035	Inlier
Ecoli	Ec_PDS000001063.100	SRR26061260	NCBI_v_CSP1	6.98039	2.26458	7	2.542	11.419	Inlier
Ecoli	Ec_PDS000001063.100	SRR26061260	NCBI_v_CSP2	4.04902	2.12192	4	-0.11	8.208	Inlier
Ecoli	Ec_PDS000001063.100	SRR26164862	CSP1_v_CSP2	-1.21569	1.4186	-1	-3.996	1.565	Inlier
Ecoli	Ec_PDS000001063.100	SRR26164862	NCBI_v_CSP1	2.78431	2.24547	3	-1.617	7.185	Inlier
Ecoli	Ec_PDS000001063.100	SRR26164862	NCBI_v_CSP2	1.56863	2.11318	1	-2.573	5.71	Inlier
Ecoli	Ec_PDS000001063.100	SRR3176148	CSP1_v_CSP2	-1.36275	1.39865	-1	-4.104	1.379	Inlier
Ecoli	Ec_PDS000001063.100	SRR3176148	NCBI_v_CSP1	-1.0098	2.17317	-1	-5.269	3.25	Inlier
Ecoli	Ec_PDS000001063.100	SRR3176148	NCBI_v_CSP2	-2.37255	2.0963	-2.5	-6.481	1.736	Inlier
Ecoli	Ec_PDS000001063.100	SRR3290095	CSP1_v_CSP2	-0.460784	1.28719	0	-2.984	2.062	Inlier
Ecoli	Ec_PDS000001063.100	SRR3290095	NCBI_v_CSP1	1.86275	2.18473	2	-2.419	6.145	Inlier
Ecoli	Ec_PDS000001063.100	SRR3290095	NCBI_v_CSP2	1.40196	2.03562	1	-2.588	5.392	Inlier
Ecoli	Ec_PDS000001063.100	SRR4293135	CSP1_v_CSP2	-0.421569	1.37471	0	-3.116	2.273	Inlier
Ecoli	Ec_PDS000001063.100	SRR4293135	NCBI_v_CSP1	1.91176	2.19406	2	-2.389	6.212	Inlier
Ecoli	Ec_PDS000001063.100	SRR4293135	NCBI_v_CSP2	1.4902	2.08125	2	-2.589	5.569	Inlier
Ecoli	Ec_PDS000001063.100	SRR4342153	CSP1_v_CSP2	-1.32353	1.2986	-1	-3.869	1.222	Inlier
Ecoli	Ec_PDS000001063.100	SRR4342153	NCBI_v_CSP1	3.58824	2.33082	4	-0.98	8.157	Inlier
Ecoli	Ec_PDS000001063.100	SRR4342153	NCBI_v_CSP2	2.26471	2.21572	2	-2.078	6.607	Inlier
Ecoli	Ec_PDS000001063.100	SRR5057538	CSP1_v_CSP2	-1.46078	1.34732	-1	-4.101	1.18	Inlier
Ecoli	Ec_PDS000001063.100	SRR5057538	NCBI_v_CSP1	3.14706	2.16816	3	-1.102	7.397	Inlier
Ecoli	Ec_PDS000001063.100	SRR5057538	NCBI_v_CSP2	1.68627	2.12473	1	-2.478	5.851	Inlier
Ecoli	Ec_PDS000001063.100	SRR5264157	CSP1_v_CSP2	-1.2451	1.44494	-1	-4.077	1.587	Inlier
Ecoli	Ec_PDS000001063.100	SRR5264157	NCBI_v_CSP1	3.06863	2.27452	3	-1.389	7.527	Inlier
Ecoli	Ec_PDS000001063.100	SRR5264157	NCBI_v_CSP2	1.82353	2.08916	2	-2.271	5.918	Inlier
Ecoli	Ec_PDS000001063.100	SRR5657870	CSP1_v_CSP2	-1.39216	1.56798	-1	-4.465	1.681	Inlier
Ecoli	Ec_PDS000001063.100	SRR5657870	NCBI_v_CSP1	3.77451	2.18413	4	-0.506	8.055	Inlier
Ecoli	Ec_PDS000001063.100	SRR5657870	NCBI_v_CSP2	2.38235	2.06836	2	-1.672	6.436	Inlier
Ecoli	Ec_PDS000001063.100	SRR5828190	CSP1_v_CSP2	-0.441176	1.33182	0	-3.051	2.169	Inlier
Ecoli	Ec_PDS000001063.100	SRR5828190	NCBI_v_CSP1	0.901961	2.25375	1	-3.515	5.319	Inlier
Ecoli	Ec_PDS000001063.100	SRR5828190	NCBI_v_CSP2	0.460784	2.07136	0	-3.599	4.521	Inlier
Ecoli	Ec_PDS000001063.100	SRR5832229	CSP1_v_CSP2	-0.431373	1.35347	0	-3.084	2.221	Inlier
Ecoli	Ec_PDS000001063.100	SRR5832229	NCBI_v_CSP1	1.93137	2.06939	2	-2.125	5.987	Inlier
Ecoli	Ec_PDS000001063.100	SRR5832229	NCBI_v_CSP2	1.5	2.0477	1	-2.513	5.513	Inlier
Ecoli	Ec_PDS000001063.100	SRR6011650	CSP1_v_CSP2	-0.323529	1.34357	0	-2.957	2.31	Inlier
Ecoli	Ec_PDS000001063.100	SRR6011650	NCBI_v_CSP1	0.294118	2.1553	0	-3.93	4.518	Inlier
Ecoli	Ec_PDS000001063.100	SRR6011650	NCBI_v_CSP2	-0.0294118	2.03171	0	-4.011	3.953	Inlier
Ecoli	Ec_PDS000001063.100	SRR6039471	CSP1_v_CSP2	-2.2549	1.46704	-2	-5.13	0.62	Inlier
Ecoli	Ec_PDS000001063.100	SRR6039471	NCBI_v_CSP1	3.96078	2.42888	4	-0.8	8.721	Inlier
Ecoli	Ec_PDS000001063.100	SRR6039471	NCBI_v_CSP2	1.70588	2.17815	2	-2.563	5.975	Inlier
Ecoli	Ec_PDS000001063.100	SRR6072221	CSP1_v_CSP2	0.607843	1.31373	1	-1.967	3.183	Inlier
Ecoli	Ec_PDS000001063.100	SRR6072221	NCBI_v_CSP1	3.10784	2.30757	3	-1.415	7.631	Inlier
Ecoli	Ec_PDS000001063.100	SRR6072221	NCBI_v_CSP2	3.71569	2.0795	4	-0.36	7.791	Inlier
Ecoli	Ec_PDS000001063.100	SRR6164730	CSP1_v_CSP2	-4.05882	1.41298	-4	-6.828	-1.289	Inlier
Ecoli	Ec_PDS000001063.100	SRR6164730	NCBI_v_CSP1	7.60784	2.0593	8	3.572	11.644	Inlier
Ecoli	Ec_PDS000001063.100	SRR6164730	NCBI_v_CSP2	3.54902	2.15088	3	-0.667	7.765	Inlier
Ecoli	Ec_PDS000001063.100	SRR6194939	CSP1_v_CSP2	-1.05882	1.35576	-1	-3.716	1.598	Inlier
Ecoli	Ec_PDS000001063.100	SRR6194939	NCBI_v_CSP1	2.45098	1.95305	2	-1.377	6.279	Inlier
Ecoli	Ec_PDS000001063.100	SRR6194939	NCBI_v_CSP2	1.39216	1.90963	1	-2.351	5.135	Inlier
Ecoli	Ec_PDS000001063.100	SRR7280781	CSP1_v_CSP2	-1.26471	1.33444	-1	-3.88	1.351	Inlier
Ecoli	Ec_PDS000001063.100	SRR7280781	NCBI_v_CSP1	3.5098	2.25917	4	-0.918	7.938	Inlier
Ecoli	Ec_PDS000001063.100	SRR7280781	NCBI_v_CSP2	2.2451	2.19105	2	-2.049	6.539	Inlier
Ecoli	Ec_PDS000001063.100	SRR7540724	CSP1_v_CSP2	-1.2549	1.46027	-1	-4.117	1.607	Inlier
Ecoli	Ec_PDS000001063.100	SRR7540724	NCBI_v_CSP1	2.9902	2.24488	3	-1.41	7.39	Inlier
Ecoli	Ec_PDS000001063.100	SRR7540724	NCBI_v_CSP2	1.73529	2.034	2	-2.251	5.722	Inlier
Ecoli	Ec_PDS000001063.100	SRR7540754	CSP1_v_CSP2	1.48039	1.46057	2	-1.382	4.343	Inlier
Ecoli	Ec_PDS000001063.100	SRR7540754	NCBI_v_CSP1	1.16667	2.22979	1	-3.204	5.537	Inlier
Ecoli	Ec_PDS000001063.100	SRR7540754	NCBI_v_CSP2	2.64706	2.02287	2	-1.318	6.612	Inlier
Ecoli	Ec_PDS000001063.100	SRR7544700	CSP1_v_CSP2	-0.264706	1.4619	0	-3.13	2.601	Inlier
Ecoli	Ec_PDS000001063.100	SRR7544700	NCBI_v_CSP1	2.18627	2.25472	2	-2.233	6.605	Inlier
Ecoli	Ec_PDS000001063.100	SRR7544700	NCBI_v_CSP2	1.92157	2.1967	2	-2.384	6.227	Inlier
Ecoli	Ec_PDS000001063.100	SRR7620595	CSP1_v_CSP2	-0.980392	1.38579	-1	-3.696	1.736	Inlier
Ecoli	Ec_PDS000001063.100	SRR7620595	NCBI_v_CSP1	2.36275	2.04789	2	-1.651	6.377	Inlier
Ecoli	Ec_PDS000001063.100	SRR7620595	NCBI_v_CSP2	1.38235	1.94501	1	-2.43	5.194	Inlier
Ecoli	Ec_PDS000001063.100	SRR7620597	CSP1_v_CSP2	0.666667	1.45788	1	-2.191	3.524	Inlier
Ecoli	Ec_PDS000001063.100	SRR7620597	NCBI_v_CSP1	1.0098	2.17317	1	-3.25	5.269	Inlier
Ecoli	Ec_PDS000001063.100	SRR7620597	NCBI_v_CSP2	1.67647	2.03515	2	-2.312	5.665	Inlier
Ecoli	Ec_PDS000001063.100	SRR7641443	CSP1_v_CSP2	-1.9902	1.38231	-2	-4.699	0.719	Inlier
Ecoli	Ec_PDS000001063.100	SRR7641443	NCBI_v_CSP1	2.98039	2.28634	3	-1.501	7.462	Inlier
Ecoli	Ec_PDS000001063.100	SRR7641443	NCBI_v_CSP2	0.990196	2.17317	1	-3.269	5.25	Inlier
Ecoli	Ec_PDS000001063.100	SRR7736604	CSP1_v_CSP2	-1	1.43506	-1	-3.813	1.813	Inlier
Ecoli	Ec_PDS000001063.100	SRR7736604	NCBI_v_CSP1	1.81373	2.11422	1.5	-2.33	5.958	Inlier
Ecoli	Ec_PDS000001063.100	SRR7736604	NCBI_v_CSP2	0.813725	2.0954	1	-3.293	4.921	Inlier
Ecoli	Ec_PDS000001063.100	SRR7759891	CSP1_v_CSP2	-0.931373	1.38778	-1	-3.651	1.789	Inlier
Ecoli	Ec_PDS000001063.100	SRR7759891	NCBI_v_CSP1	7.32353	2.15793	7	3.094	11.553	Inlier
Ecoli	Ec_PDS000001063.100	SRR7759891	NCBI_v_CSP2	6.39216	1.95573	6.5	2.559	10.225	Inlier
Ecoli	Ec_PDS000001063.100	SRR7909646	CSP1_v_CSP2	2.42157	1.42423	3	-0.37	5.213	Inlier
Ecoli	Ec_PDS000001063.100	SRR7909646	NCBI_v_CSP1	0.441176	2.2889	0	-4.045	4.927	Inlier
Ecoli	Ec_PDS000001063.100	SRR7909646	NCBI_v_CSP2	2.86275	2.02479	3	-1.106	6.831	Inlier
Ecoli	Ec_PDS000001063.100	SRR7910094	CSP1_v_CSP2	-2.56863	2.04654	-3	-6.58	1.443	Inlier
Ecoli	Ec_PDS000001063.100	SRR7910094	NCBI_v_CSP1	-1.03922	2.29904	-1	-5.545	3.467	Inlier
Ecoli	Ec_PDS000001063.100	SRR7910094	NCBI_v_CSP2	-3.60784	2.47025	-4	-8.449	1.234	Inlier
Ecoli	Ec_PDS000001063.100	SRR7949685	CSP1_v_CSP2	1.90196	1.6381	2	-1.309	5.113	Inlier
Ecoli	Ec_PDS000001063.100	SRR7949685	NCBI_v_CSP1	4.01961	2.22488	4	-0.341	8.38	Inlier
Ecoli	Ec_PDS000001063.100	SRR7949685	NCBI_v_CSP2	5.92157	2.00833	6	1.985	9.858	Inlier
Ecoli	Ec_PDS000001063.100	SRR7958527	CSP1_v_CSP2	-0.431373	1.36076	0	-3.098	2.236	Inlier
Ecoli	Ec_PDS000001063.100	SRR7958527	NCBI_v_CSP1	3.69608	2.16995	3	-0.557	7.949	Inlier
Ecoli	Ec_PDS000001063.100	SRR7958527	NCBI_v_CSP2	3.26471	2.01444	3	-0.684	7.213	Inlier
Ecoli	Ec_PDS000001063.100	SRR8931104	CSP1_v_CSP2	1.4902	1.51393	2	-1.477	4.457	Inlier
Ecoli	Ec_PDS000001063.100	SRR8931104	NCBI_v_CSP1	0.215686	2.13703	0	-3.973	4.404	Inlier
Ecoli	Ec_PDS000001063.100	SRR8931104	NCBI_v_CSP2	1.70588	2.30191	2	-2.806	6.218	Inlier
Ecoli	Ec_PDS000001063.100	SRR8931126	CSP1_v_CSP2	0.529412	1.48728	1	-2.386	3.444	Inlier
Ecoli	Ec_PDS000001063.100	SRR8931126	NCBI_v_CSP1	0.176471	2.10333	0	-3.946	4.299	Inlier
Ecoli	Ec_PDS000001063.100	SRR8931126	NCBI_v_CSP2	0.705882	2.26724	1	-3.738	5.15	Inlier
Ecoli	Ec_PDS000001063.100	SRR9622463	CSP1_v_CSP2	-3.03922	1.36376	-3	-5.712	-0.366	Inlier
Ecoli	Ec_PDS000001063.100	SRR9622463	NCBI_v_CSP1	5.81373	2.21931	6	1.464	10.164	Inlier
Ecoli	Ec_PDS000001063.100	SRR9622463	NCBI_v_CSP2	2.77451	2.12438	3	-1.389	6.938	Inlier
Ecoli	Ec_PDS000001063.100	SRR9734354	CSP1_v_CSP2	-0.392157	1.37989	0	-3.097	2.312	Inlier
Ecoli	Ec_PDS000001063.100	SRR9734354	NCBI_v_CSP1	5.51961	1.97875	5.5	1.641	9.398	Inlier
Ecoli	Ec_PDS000001063.100	SRR9734354	NCBI_v_CSP2	5.12745	1.94311	5	1.319	8.936	Inlier
Ecoli	Ec_PDS000001063.100	SRR9826934	CSP1_v_CSP2	-1.64706	1.50673	-2	-4.6	1.306	Inlier
Ecoli	Ec_PDS000001063.100	SRR9826934	NCBI_v_CSP1	5.43137	2.28863	5	0.946	9.917	Inlier
Ecoli	Ec_PDS000001063.100	SRR9826934	NCBI_v_CSP2	3.78431	2.20543	4	-0.538	8.107	Inlier
Ecoli	Ec_PDS000001063.100	SRR9903038	CSP1_v_CSP2	0.215686	1.46664	0	-2.659	3.09	Inlier
Ecoli	Ec_PDS000001063.100	SRR9903038	NCBI_v_CSP1	7.9902	1.86948	8	4.326	11.654	Inlier
Ecoli	Ec_PDS000001063.100	SRR9903038	NCBI_v_CSP2	8.20588	1.81489	8	4.649	11.763	Inlier
Ecoli	Ec_PDS000001063.100	SRR9968551	CSP1_v_CSP2	-0.284314	1.60678	0	-3.434	2.865	Inlier
Ecoli	Ec_PDS000001063.100	SRR9968551	NCBI_v_CSP1	0.715686	2.19079	1	-3.578	5.01	Inlier
Ecoli	Ec_PDS000001063.100	SRR9968551	NCBI_v_CSP2	0.431373	2.15034	0	-3.783	4.646	Inlier
Ecoli	Ec_PDS000003443.105	SRR10049743	CSP1_v_CSP2	-1.11321	0.969249	-1	-3.013	0.786	Inlier
Ecoli	Ec_PDS000003443.105	SRR10049743	NCBI_v_CSP1	2.83962	1.80548	3	-0.699	6.378	Inlier
Ecoli	Ec_PDS000003443.105	SRR10049743	NCBI_v_CSP2	1.72642	1.993	1	-2.18	5.633	Inlier
Ecoli	Ec_PDS000003443.105	SRR10298090	CSP1_v_CSP2	-0.45283	0.986886	-1	-2.387	1.481	Inlier
Ecoli	Ec_PDS000003443.105	SRR10298090	NCBI_v_CSP1	4.82075	2.37365	4	0.168	9.473	Inlier
Ecoli	Ec_PDS000003443.105	SRR10298090	NCBI_v_CSP2	4.36792	2.25653	4	-0.055	8.791	Inlier
Ecoli	Ec_PDS000003443.105	SRR10326090	CSP1_v_CSP2	-0.509434	0.886355	-1	-2.247	1.228	Inlier
Ecoli	Ec_PDS000003443.105	SRR10326090	NCBI_v_CSP1	2.41509	1.77747	2	-1.069	5.899	Inlier
Ecoli	Ec_PDS000003443.105	SRR10326090	NCBI_v_CSP2	1.90566	1.72118	2	-1.468	5.279	Inlier
Ecoli	Ec_PDS000003443.105	SRR11409409	CSP1_v_CSP2	0.481132	0.830733	0	-1.147	2.109	Inlier
Ecoli	Ec_PDS000003443.105	SRR11409409	NCBI_v_CSP1	7.10377	1.52396	7	4.117	10.091	Inlier
Ecoli	Ec_PDS000003443.105	SRR11409409	NCBI_v_CSP2	7.58491	1.59085	7	4.467	10.703	Inlier
Ecoli	Ec_PDS000003443.105	SRR11729228	CSP1_v_CSP2	-0.415094	1.0035	-1	-2.382	1.552	Inlier
Ecoli	Ec_PDS000003443.105	SRR11729228	NCBI_v_CSP1	4.40566	2.19427	4	0.105	8.706	Inlier
Ecoli	Ec_PDS000003443.105	SRR11729228	NCBI_v_CSP2	3.99057	2.12242	4	-0.169	8.15	Inlier
Ecoli	Ec_PDS000003443.105	SRR11935595	CSP1_v_CSP2	-0.556604	0.851667	0	-2.226	1.113	Inlier
Ecoli	Ec_PDS000003443.105	SRR11935595	NCBI_v_CSP1	2.74528	1.8156	3	-0.813	6.304	Inlier
Ecoli	Ec_PDS000003443.105	SRR11935595	NCBI_v_CSP2	2.18868	1.90295	2	-1.541	5.918	Inlier
Ecoli	Ec_PDS000003443.105	SRR12334091	CSP1_v_CSP2	1.53774	0.937825	1	-0.3	3.376	Inlier
Ecoli	Ec_PDS000003443.105	SRR12334091	NCBI_v_CSP1	4.22642	2.12595	4	0.06	8.393	Inlier
Ecoli	Ec_PDS000003443.105	SRR12334091	NCBI_v_CSP2	5.76415	1.98831	5	1.867	9.661	Inlier
Ecoli	Ec_PDS000003443.105	SRR12436110	CSP1_v_CSP2	0.367925	0.979071	0	-1.551	2.287	Inlier
Ecoli	Ec_PDS000003443.105	SRR12436110	NCBI_v_CSP1	3.31132	1.9438	3	-0.498	7.121	Inlier
Ecoli	Ec_PDS000003443.105	SRR12436110	NCBI_v_CSP2	3.67925	2.04961	3	-0.338	7.696	Inlier
Ecoli	Ec_PDS000003443.105	SRR12553632	CSP1_v_CSP2	0.103774	0.815671	0	-1.495	1.702	Inlier
Ecoli	Ec_PDS000003443.105	SRR12553632	NCBI_v_CSP1	4.34906	2.55992	4	-0.668	9.366	Inlier
Ecoli	Ec_PDS000003443.105	SRR12553632	NCBI_v_CSP2	4.45283	2.57509	4	-0.594	9.5	Inlier
Ecoli	Ec_PDS000003443.105	SRR12609106	CSP1_v_CSP2	-0.443396	0.873746	-1	-2.156	1.269	Inlier
Ecoli	Ec_PDS000003443.105	SRR12609106	NCBI_v_CSP1	3.71698	1.92604	4	-0.058	7.492	Inlier
Ecoli	Ec_PDS000003443.105	SRR12609106	NCBI_v_CSP2	3.27358	1.92494	3	-0.499	7.046	Inlier
Ecoli	Ec_PDS000003443.105	SRR12642636	CSP1_v_CSP2	0.424528	0.827482	0	-1.197	2.046	Inlier
Ecoli	Ec_PDS000003443.105	SRR12642636	NCBI_v_CSP1	2.15094	1.93609	2	-1.644	5.946	Inlier
Ecoli	Ec_PDS000003443.105	SRR12642636	NCBI_v_CSP2	2.57547	1.81501	2	-0.982	6.133	Inlier
Ecoli	Ec_PDS000003443.105	SRR12642639	CSP1_v_CSP2	0.424528	0.827482	0	-1.197	2.046	Inlier
Ecoli	Ec_PDS000003443.105	SRR12642639	NCBI_v_CSP1	2.53774	1.70252	3	-0.799	5.875	Inlier
Ecoli	Ec_PDS000003443.105	SRR12642639	NCBI_v_CSP2	2.96226	1.61496	3	-0.203	6.128	Inlier
Ecoli	Ec_PDS000003443.105	SRR12779388	CSP1_v_CSP2	2.20755	0.963298	2	0.32	4.096	Inlier
Ecoli	Ec_PDS000003443.105	SRR12779388	NCBI_v_CSP1	2.69811	2.01504	2	-1.251	6.648	Inlier
Ecoli	Ec_PDS000003443.105	SRR12779388	NCBI_v_CSP2	4.90566	2.02145	4	0.944	8.868	Inlier
Ecoli	Ec_PDS000003443.105	SRR12826971	CSP1_v_CSP2	-0.509434	0.819353	0	-2.115	1.096	Inlier
Ecoli	Ec_PDS000003443.105	SRR12826971	NCBI_v_CSP1	3.28302	1.83487	3	-0.313	6.879	Inlier
Ecoli	Ec_PDS000003443.105	SRR12826971	NCBI_v_CSP2	2.77358	2.07609	2	-1.295	6.843	Inlier
Ecoli	Ec_PDS000003443.105	SRR12827057	CSP1_v_CSP2	-0.471698	0.896634	0	-2.229	1.286	Inlier
Ecoli	Ec_PDS000003443.105	SRR12827057	NCBI_v_CSP1	2.75472	1.92632	3	-1.021	6.53	Inlier
Ecoli	Ec_PDS000003443.105	SRR12827057	NCBI_v_CSP2	2.28302	2.09196	2	-1.817	6.383	Inlier
Ecoli	Ec_PDS000003443.105	SRR13450347	CSP1_v_CSP2	-0.301887	0.841425	0	-1.951	1.347	Inlier
Ecoli	Ec_PDS000003443.105	SRR13450347	NCBI_v_CSP1	2.76415	1.45767	3	-0.093	5.621	Inlier
Ecoli	Ec_PDS000003443.105	SRR13450347	NCBI_v_CSP2	2.46226	1.36049	2	-0.204	5.129	Inlier
Ecoli	Ec_PDS000003443.105	SRR13450366	CSP1_v_CSP2	-0.169811	0.82198	0	-1.781	1.441	Inlier
Ecoli	Ec_PDS000003443.105	SRR13450366	NCBI_v_CSP1	4.62264	1.60031	5	1.486	7.759	Inlier
Ecoli	Ec_PDS000003443.105	SRR13450366	NCBI_v_CSP2	4.45283	1.71898	4	1.084	7.822	Inlier
Ecoli	Ec_PDS000003443.105	SRR13498618	CSP1_v_CSP2	-0.556604	0.862777	-1	-2.248	1.134	Inlier
Ecoli	Ec_PDS000003443.105	SRR13498618	NCBI_v_CSP1	3.74528	2.54132	3	-1.236	8.726	Inlier
Ecoli	Ec_PDS000003443.105	SRR13498618	NCBI_v_CSP2	3.18868	2.37091	2	-1.458	7.836	Inlier
Ecoli	Ec_PDS000003443.105	SRR13522399	CSP1_v_CSP2	-0.0754717	0.699634	0	-1.447	1.296	Inlier
Ecoli	Ec_PDS000003443.105	SRR13522399	NCBI_v_CSP1	2.50943	2.09873	2	-1.604	6.623	Inlier
Ecoli	Ec_PDS000003443.105	SRR13522399	NCBI_v_CSP2	2.43396	2.22119	2	-1.919	6.787	Inlier
Ecoli	Ec_PDS000003443.105	SRR13689825	CSP1_v_CSP2	-0.688679	0.854826	-1	-2.364	0.987	Inlier
Ecoli	Ec_PDS000003443.105	SRR13689825	NCBI_v_CSP1	4.29245	1.41399	4	1.521	7.064	Inlier
Ecoli	Ec_PDS000003443.105	SRR13689825	NCBI_v_CSP2	3.60377	1.67149	3	0.328	6.88	Inlier
Ecoli	Ec_PDS000003443.105	SRR13736944	CSP1_v_CSP2	-0.0943396	1.11721	0	-2.284	2.095	Inlier
Ecoli	Ec_PDS000003443.105	SRR13736944	NCBI_v_CSP1	4.34906	2.6224	4	-0.791	9.489	Inlier
Ecoli	Ec_PDS000003443.105	SRR13736944	NCBI_v_CSP2	4.25472	2.35053	3	-0.352	8.862	Inlier
Ecoli	Ec_PDS000003443.105	SRR14076815	CSP1_v_CSP2	-0.5	0.886405	-1	-2.237	1.237	Inlier
Ecoli	Ec_PDS000003443.105	SRR14076815	NCBI_v_CSP1	3.75472	1.92632	4	-0.021	7.53	Inlier
Ecoli	Ec_PDS000003443.105	SRR14076815	NCBI_v_CSP2	3.25472	1.84681	3	-0.365	6.874	Inlier
Ecoli	Ec_PDS000003443.105	SRR14076816	CSP1_v_CSP2	-0.509434	0.897035	-1	-2.268	1.249	Inlier
Ecoli	Ec_PDS000003443.105	SRR14076816	NCBI_v_CSP1	2.14151	1.65868	2	-1.109	5.392	Inlier
Ecoli	Ec_PDS000003443.105	SRR14076816	NCBI_v_CSP2	1.63208	1.53886	1	-1.384	4.648	Inlier
Ecoli	Ec_PDS000003443.105	SRR14076817	CSP1_v_CSP2	-1.27358	0.941458	-1	-3.119	0.572	Inlier
Ecoli	Ec_PDS000003443.105	SRR14076817	NCBI_v_CSP1	3.03774	1.67857	3	-0.252	6.328	Inlier
Ecoli	Ec_PDS000003443.105	SRR14076817	NCBI_v_CSP2	1.76415	1.64202	1.5	-1.454	4.982	Inlier
Ecoli	Ec_PDS000003443.105	SRR14252165	CSP1_v_CSP2	-0.424528	0.96558	-1	-2.317	1.468	Inlier
Ecoli	Ec_PDS000003443.105	SRR14252165	NCBI_v_CSP1	3.88679	1.66945	4	0.615	7.159	Inlier
Ecoli	Ec_PDS000003443.105	SRR14252165	NCBI_v_CSP2	3.46226	1.4747	3	0.572	6.353	Inlier
Ecoli	Ec_PDS000003443.105	SRR14920158	CSP1_v_CSP2	-1.49057	0.783706	-1	-3.027	0.045	Inlier
Ecoli	Ec_PDS000003443.105	SRR14920158	NCBI_v_CSP1	4.54717	1.93776	5	0.749	8.345	Inlier
Ecoli	Ec_PDS000003443.105	SRR14920158	NCBI_v_CSP2	3.0566	2.0087	3	-0.88	6.994	Inlier
Ecoli	Ec_PDS000003443.105	SRR14934773	CSP1_v_CSP2	-0.5	0.886405	-1	-2.237	1.237	Inlier
Ecoli	Ec_PDS000003443.105	SRR14934773	NCBI_v_CSP1	2.80189	1.80697	3	-0.74	6.343	Inlier
Ecoli	Ec_PDS000003443.105	SRR14934773	NCBI_v_CSP2	2.30189	1.71919	2	-1.068	5.671	Inlier
Ecoli	Ec_PDS000003443.105	SRR15193946	CSP1_v_CSP2	-1.4434	0.873746	-1	-3.156	0.269	Inlier
Ecoli	Ec_PDS000003443.105	SRR15193946	NCBI_v_CSP1	3.62264	1.92948	4	-0.159	7.404	Inlier
Ecoli	Ec_PDS000003443.105	SRR15193946	NCBI_v_CSP2	2.17925	1.90637	2	-1.557	5.916	Inlier
Ecoli	Ec_PDS000003443.105	SRR15248073	CSP1_v_CSP2	-0.509434	0.864598	0	-2.204	1.185	Inlier
Ecoli	Ec_PDS000003443.105	SRR15248073	NCBI_v_CSP1	2.62264	1.69847	3	-0.706	5.952	Inlier
Ecoli	Ec_PDS000003443.105	SRR15248073	NCBI_v_CSP2	2.11321	1.79587	2	-1.407	5.633	Inlier
Ecoli	Ec_PDS000003443.105	SRR15248548	CSP1_v_CSP2	-0.566038	0.816717	0	-2.167	1.035	Inlier
Ecoli	Ec_PDS000003443.105	SRR15248548	NCBI_v_CSP1	1.95283	1.65835	2	-1.297	5.203	Inlier
Ecoli	Ec_PDS000003443.105	SRR15248548	NCBI_v_CSP2	1.38679	1.80777	1	-2.156	4.93	Inlier
Ecoli	Ec_PDS000003443.105	SRR15248566	CSP1_v_CSP2	-0.566038	0.828296	0	-2.189	1.057	Inlier
Ecoli	Ec_PDS000003443.105	SRR15248566	NCBI_v_CSP1	1.86792	1.66233	2	-1.39	5.126	Inlier
Ecoli	Ec_PDS000003443.105	SRR15248566	NCBI_v_CSP2	1.30189	1.78443	1	-2.196	4.799	Inlier
Ecoli	Ec_PDS000003443.105	SRR15308190	CSP1_v_CSP2	-0.443396	0.895281	0	-2.198	1.311	Inlier
Ecoli	Ec_PDS000003443.105	SRR15308190	NCBI_v_CSP1	1.83962	1.65694	2	-1.408	5.087	Inlier
Ecoli	Ec_PDS000003443.105	SRR15308190	NCBI_v_CSP2	1.39623	1.78715	1	-2.107	4.899	Inlier
Ecoli	Ec_PDS000003443.105	SRR15308192	CSP1_v_CSP2	-0.160377	1.06133	0	-2.241	1.92	Inlier
Ecoli	Ec_PDS000003443.105	SRR15308192	NCBI_v_CSP1	1.45283	1.77888	1	-2.034	4.939	Inlier
Ecoli	Ec_PDS000003443.105	SRR15308192	NCBI_v_CSP2	1.29245	1.7993	1	-2.234	4.819	Inlier
Ecoli	Ec_PDS000003443.105	SRR15422771	CSP1_v_CSP2	-0.509434	0.864598	0	-2.204	1.185	Inlier
Ecoli	Ec_PDS000003443.105	SRR15422771	NCBI_v_CSP1	1.88679	1.65225	2	-1.352	5.125	Inlier
Ecoli	Ec_PDS000003443.105	SRR15422771	NCBI_v_CSP2	1.37736	1.81241	1	-2.175	4.93	Inlier
Ecoli	Ec_PDS000003443.105	SRR15593025	CSP1_v_CSP2	0.386792	0.834617	0	-1.249	2.023	Inlier
Ecoli	Ec_PDS000003443.105	SRR15593025	NCBI_v_CSP1	3.0283	1.85912	3	-0.616	6.672	Inlier
Ecoli	Ec_PDS000003443.105	SRR15593025	NCBI_v_CSP2	3.41509	1.89168	3	-0.293	7.123	Inlier
Ecoli	Ec_PDS000003443.105	SRR16526334	CSP1_v_CSP2	-1.45283	0.967393	-2	-3.349	0.443	Inlier
Ecoli	Ec_PDS000003443.105	SRR16526334	NCBI_v_CSP1	3.54717	2.10728	3	-0.583	7.677	Inlier
Ecoli	Ec_PDS000003443.105	SRR16526334	NCBI_v_CSP2	2.09434	2.06342	2	-1.95	6.139	Inlier
Ecoli	Ec_PDS000003443.105	SRR18432532	CSP1_v_CSP2	-0.509434	0.842279	-1	-2.16	1.141	Inlier
Ecoli	Ec_PDS000003443.105	SRR18432532	NCBI_v_CSP1	3.65094	2.49205	3	-1.233	8.535	Inlier
Ecoli	Ec_PDS000003443.105	SRR18432532	NCBI_v_CSP2	3.14151	2.32763	3	-1.421	7.704	Inlier
Ecoli	Ec_PDS000003443.105	SRR18637708	CSP1_v_CSP2	-0.528302	0.830462	0	-2.156	1.099	Inlier
Ecoli	Ec_PDS000003443.105	SRR18637708	NCBI_v_CSP1	3.9717	2.43176	4	-0.794	8.738	Inlier
Ecoli	Ec_PDS000003443.105	SRR18637708	NCBI_v_CSP2	3.4434	2.22145	4	-0.911	7.797	Inlier
Ecoli	Ec_PDS000003443.105	SRR19119690	CSP1_v_CSP2	-0.528302	0.830462	0	-2.156	1.099	Inlier
Ecoli	Ec_PDS000003443.105	SRR19119690	NCBI_v_CSP1	4.18868	2.44993	4.5	-0.613	8.99	Inlier
Ecoli	Ec_PDS000003443.105	SRR19119690	NCBI_v_CSP2	3.66038	2.25467	4	-0.759	8.079	Inlier
Ecoli	Ec_PDS000003443.105	SRR19177897	CSP1_v_CSP2	-0.528302	0.830462	0	-2.156	1.099	Inlier
Ecoli	Ec_PDS000003443.105	SRR19177897	NCBI_v_CSP1	4.10377	2.45698	4	-0.712	8.919	Inlier
Ecoli	Ec_PDS000003443.105	SRR19177897	NCBI_v_CSP2	3.57547	2.25071	4	-0.836	7.987	Inlier
Ecoli	Ec_PDS000003443.105	SRR19199933	CSP1_v_CSP2	-0.386792	1.03805	-1	-2.421	1.648	Inlier
Ecoli	Ec_PDS000003443.105	SRR19199933	NCBI_v_CSP1	2.01887	1.73469	2	-1.381	5.419	Inlier
Ecoli	Ec_PDS000003443.105	SRR19199933	NCBI_v_CSP2	1.63208	1.53886	1	-1.384	4.648	Inlier
Ecoli	Ec_PDS000003443.105	SRR19582285	CSP1_v_CSP2	-0.415094	0.934706	0	-2.247	1.417	Inlier
Ecoli	Ec_PDS000003443.105	SRR19582285	NCBI_v_CSP1	4.80189	2.64186	5	-0.376	9.98	Inlier
Ecoli	Ec_PDS000003443.105	SRR19582285	NCBI_v_CSP2	4.38679	2.40068	4.5	-0.318	9.092	Inlier
Ecoli	Ec_PDS000003443.105	SRR19595354	CSP1_v_CSP2	-0.528302	0.85309	0	-2.2	1.144	Inlier
Ecoli	Ec_PDS000003443.105	SRR19595354	NCBI_v_CSP1	2.82075	1.80368	3	-0.714	6.356	Inlier
Ecoli	Ec_PDS000003443.105	SRR19595354	NCBI_v_CSP2	2.29245	1.91718	2	-1.465	6.05	Inlier
Ecoli	Ec_PDS000003443.105	SRR19638240	CSP1_v_CSP2	-0.537736	0.830084	0	-2.165	1.089	Inlier
Ecoli	Ec_PDS000003443.105	SRR19638240	NCBI_v_CSP1	4.10377	2.45698	4	-0.712	8.919	Inlier
Ecoli	Ec_PDS000003443.105	SRR19638240	NCBI_v_CSP2	3.56604	2.25101	4	-0.846	7.978	Inlier
Ecoli	Ec_PDS000003443.105	SRR19642977	CSP1_v_CSP2	-0.537736	0.830084	0	-2.165	1.089	Inlier
Ecoli	Ec_PDS000003443.105	SRR19642977	NCBI_v_CSP1	4.18868	2.44993	4.5	-0.613	8.99	Inlier
Ecoli	Ec_PDS000003443.105	SRR19642977	NCBI_v_CSP2	3.65094	2.25533	4	-0.769	8.071	Inlier
Ecoli	Ec_PDS000003443.105	SRR19738199	CSP1_v_CSP2	-0.518868	0.830733	0	-2.147	1.109	Inlier
Ecoli	Ec_PDS000003443.105	SRR19738199	NCBI_v_CSP1	4.16038	1.80548	4	0.622	7.699	Inlier
Ecoli	Ec_PDS000003443.105	SRR19738199	NCBI_v_CSP2	3.64151	1.73034	3	0.25	7.033	Inlier
Ecoli	Ec_PDS000003443.105	SRR19744291	CSP1_v_CSP2	-0.40566	0.933792	0	-2.236	1.425	Inlier
Ecoli	Ec_PDS000003443.105	SRR19744291	NCBI_v_CSP1	4.06604	2.47374	4.5	-0.782	8.914	Inlier
Ecoli	Ec_PDS000003443.105	SRR19744291	NCBI_v_CSP2	3.66038	2.25467	4	-0.759	8.079	Inlier
Ecoli	Ec_PDS000003443.105	SRR19846545	CSP1_v_CSP2	-0.462264	0.863818	-1	-2.155	1.231	Inlier
Ecoli	Ec_PDS000003443.105	SRR19846545	NCBI_v_CSP1	2.95283	2.376	2	-1.704	7.61	Inlier
Ecoli	Ec_PDS000003443.105	SRR19846545	NCBI_v_CSP2	2.49057	2.27301	2	-1.964	6.946	Inlier
Ecoli	Ec_PDS000003443.105	SRR19860790	CSP1_v_CSP2	-0.5	0.819407	0	-2.106	1.106	Inlier
Ecoli	Ec_PDS000003443.105	SRR19860790	NCBI_v_CSP1	4.17925	2.46034	4.5	-0.643	9.001	Inlier
Ecoli	Ec_PDS000003443.105	SRR19860790	NCBI_v_CSP2	3.67925	2.27846	4	-0.786	8.145	Inlier
Ecoli	Ec_PDS000003443.105	SRR19866003	CSP1_v_CSP2	0.5	0.875595	1	-1.216	2.216	Inlier
Ecoli	Ec_PDS000003443.105	SRR19866003	NCBI_v_CSP1	3.60377	1.92566	4	-0.17	7.378	Inlier
Ecoli	Ec_PDS000003443.105	SRR19866003	NCBI_v_CSP2	4.10377	2.01862	4	0.147	8.06	Inlier
Ecoli	Ec_PDS000003443.105	SRR19897623	CSP1_v_CSP2	-0.518868	0.819188	0	-2.124	1.087	Inlier
Ecoli	Ec_PDS000003443.105	SRR19897623	NCBI_v_CSP1	3.99057	2.42799	4	-0.768	8.749	Inlier
Ecoli	Ec_PDS000003443.105	SRR19897623	NCBI_v_CSP2	3.4717	2.21341	4	-0.867	7.81	Inlier
Ecoli	Ec_PDS000003443.105	SRR19909726	CSP1_v_CSP2	-0.490566	0.807645	-1	-2.074	1.092	Inlier
Ecoli	Ec_PDS000003443.105	SRR19909726	NCBI_v_CSP1	3.99057	2.38845	3	-0.691	8.672	Inlier
Ecoli	Ec_PDS000003443.105	SRR19909726	NCBI_v_CSP2	3.5	2.30217	3	-1.012	8.012	Inlier
Ecoli	Ec_PDS000003443.105	SRR19909728	CSP1_v_CSP2	-0.386792	0.94184	-1	-2.233	1.459	Inlier
Ecoli	Ec_PDS000003443.105	SRR19909728	NCBI_v_CSP1	3.29245	1.88713	3	-0.406	6.991	Inlier
Ecoli	Ec_PDS000003443.105	SRR19909728	NCBI_v_CSP2	2.90566	1.7377	3	-0.5	6.311	Inlier
Ecoli	Ec_PDS000003443.105	SRR19909732	CSP1_v_CSP2	-0.358491	0.874928	0	-2.073	1.356	Inlier
Ecoli	Ec_PDS000003443.105	SRR19909732	NCBI_v_CSP1	7	2.37045	7	2.354	11.646	Inlier
Ecoli	Ec_PDS000003443.105	SRR19909732	NCBI_v_CSP2	6.64151	2.27277	7	2.187	11.096	Inlier
Ecoli	Ec_PDS000003443.105	SRR19973708	CSP1_v_CSP2	-0.528302	0.830462	0	-2.156	1.099	Inlier
Ecoli	Ec_PDS000003443.105	SRR19973708	NCBI_v_CSP1	4.18868	2.44993	4.5	-0.613	8.99	Inlier
Ecoli	Ec_PDS000003443.105	SRR19973708	NCBI_v_CSP2	3.66038	2.25467	4	-0.759	8.079	Inlier
Ecoli	Ec_PDS000003443.105	SRR19996328	CSP1_v_CSP2	-0.537736	0.830084	0	-2.165	1.089	Inlier
Ecoli	Ec_PDS000003443.105	SRR19996328	NCBI_v_CSP1	4.07547	2.42486	4	-0.677	8.828	Inlier
Ecoli	Ec_PDS000003443.105	SRR19996328	NCBI_v_CSP2	3.53774	2.22614	4	-0.825	7.901	Inlier
Ecoli	Ec_PDS000003443.105	SRR20230039	CSP1_v_CSP2	-0.537736	0.830084	0	-2.165	1.089	Inlier
Ecoli	Ec_PDS000003443.105	SRR20230039	NCBI_v_CSP1	4.10377	2.45698	4	-0.712	8.919	Inlier
Ecoli	Ec_PDS000003443.105	SRR20230039	NCBI_v_CSP2	3.56604	2.25101	4	-0.846	7.978	Inlier
Ecoli	Ec_PDS000003443.105	SRR20289046	CSP1_v_CSP2	-0.933962	0.733795	-1	-2.372	0.504	Inlier
Ecoli	Ec_PDS000003443.105	SRR20289046	NCBI_v_CSP1	4.29245	2.11105	4	0.155	8.43	Inlier
Ecoli	Ec_PDS000003443.105	SRR20289046	NCBI_v_CSP2	3.35849	2.21763	3	-0.988	7.705	Inlier
Ecoli	Ec_PDS000003443.105	SRR20334764	CSP1_v_CSP2	-1.5	0.807701	-2	-3.083	0.083	Inlier
Ecoli	Ec_PDS000003443.105	SRR20334764	NCBI_v_CSP1	3.92453	2.44832	3	-0.874	8.723	Inlier
Ecoli	Ec_PDS000003443.105	SRR20334764	NCBI_v_CSP2	2.42453	2.34601	2	-2.174	7.023	Inlier
Ecoli	Ec_PDS000003443.105	SRR20426672	CSP1_v_CSP2	-0.481132	0.864442	-1	-2.175	1.213	Inlier
Ecoli	Ec_PDS000003443.105	SRR20426672	NCBI_v_CSP1	2.98113	2.37439	2	-1.673	7.635	Inlier
Ecoli	Ec_PDS000003443.105	SRR20426672	NCBI_v_CSP2	2.5	2.32277	2	-2.053	7.053	Inlier
Ecoli	Ec_PDS000003443.105	SRR2056397	CSP1_v_CSP2	-0.462264	0.917289	-1	-2.26	1.336	Inlier
Ecoli	Ec_PDS000003443.105	SRR2056397	NCBI_v_CSP1	3.49057	2.07592	3	-0.578	7.559	Inlier
Ecoli	Ec_PDS000003443.105	SRR2056397	NCBI_v_CSP2	3.0283	2.0352	3	-0.961	7.017	Inlier
Ecoli	Ec_PDS000003443.105	SRR20697675	CSP1_v_CSP2	-0.537736	0.830084	0	-2.165	1.089	Inlier
Ecoli	Ec_PDS000003443.105	SRR20697675	NCBI_v_CSP1	4.10377	2.45698	4	-0.712	8.919	Inlier
Ecoli	Ec_PDS000003443.105	SRR20697675	NCBI_v_CSP2	3.56604	2.25101	4	-0.846	7.978	Inlier
Ecoli	Ec_PDS000003443.105	SRR20718341	CSP1_v_CSP2	-0.367925	0.918855	0	-2.169	1.433	Inlier
Ecoli	Ec_PDS000003443.105	SRR20718341	NCBI_v_CSP1	4.49057	2.26882	5	0.044	8.937	Inlier
Ecoli	Ec_PDS000003443.105	SRR20718341	NCBI_v_CSP2	4.12264	2.1323	4	-0.057	8.302	Inlier
Ecoli	Ec_PDS000003443.105	SRR20740534	CSP1_v_CSP2	0.518868	1.01635	0	-1.473	2.511	Inlier
Ecoli	Ec_PDS000003443.105	SRR20740534	NCBI_v_CSP1	1.98113	2.3784	1	-2.68	6.643	Inlier
Ecoli	Ec_PDS000003443.105	SRR20740534	NCBI_v_CSP2	2.5	2.31866	2	-2.044	7.044	Inlier
Ecoli	Ec_PDS000003443.105	SRR20830369	CSP1_v_CSP2	-0.518868	0.795597	-1	-2.078	1.04	Inlier
Ecoli	Ec_PDS000003443.105	SRR20830369	NCBI_v_CSP1	2.99057	2.38046	2	-1.675	7.656	Inlier
Ecoli	Ec_PDS000003443.105	SRR20830369	NCBI_v_CSP2	2.4717	2.29786	2	-2.032	6.975	Inlier
Ecoli	Ec_PDS000003443.105	SRR20964759	CSP1_v_CSP2	-0.40566	0.870449	0	-2.112	1.3	Inlier
Ecoli	Ec_PDS000003443.105	SRR20964759	NCBI_v_CSP1	4.06604	2.41136	4	-0.66	8.792	Inlier
Ecoli	Ec_PDS000003443.105	SRR20964759	NCBI_v_CSP2	3.66038	2.26731	4	-0.783	8.104	Inlier
Ecoli	Ec_PDS000003443.105	SRR21023603	CSP1_v_CSP2	-0.528302	0.830462	0	-2.156	1.099	Inlier
Ecoli	Ec_PDS000003443.105	SRR21023603	NCBI_v_CSP1	4.10377	2.45698	4	-0.712	8.919	Inlier
Ecoli	Ec_PDS000003443.105	SRR21023603	NCBI_v_CSP2	3.57547	2.25071	4	-0.836	7.987	Inlier
Ecoli	Ec_PDS000003443.105	SRR21071616	CSP1_v_CSP2	-0.415094	0.934706	0	-2.247	1.417	Inlier
Ecoli	Ec_PDS000003443.105	SRR21071616	NCBI_v_CSP1	3.84906	2.45645	4	-0.965	8.664	Inlier
Ecoli	Ec_PDS000003443.105	SRR21071616	NCBI_v_CSP2	3.43396	2.22119	3.5	-0.919	7.787	Inlier
Ecoli	Ec_PDS000003443.105	SRR21227805	CSP1_v_CSP2	-0.462264	0.806811	0	-2.044	1.119	Inlier
Ecoli	Ec_PDS000003443.105	SRR21227805	NCBI_v_CSP1	4.85849	2.53523	5	-0.11	9.827	Inlier
Ecoli	Ec_PDS000003443.105	SRR21227805	NCBI_v_CSP2	4.39623	2.40903	5	-0.325	9.118	Inlier
Ecoli	Ec_PDS000003443.105	SRR21231519	CSP1_v_CSP2	0.0566038	0.814513	0	-1.54	1.653	Inlier
Ecoli	Ec_PDS000003443.105	SRR21231519	NCBI_v_CSP1	4.12264	2.38129	3.5	-0.545	8.79	Inlier
Ecoli	Ec_PDS000003443.105	SRR21231519	NCBI_v_CSP2	4.17925	2.4487	3	-0.62	8.979	Inlier
Ecoli	Ec_PDS000003443.105	SRR21380953	CSP1_v_CSP2	-0.443396	0.873746	0	-2.156	1.269	Inlier
Ecoli	Ec_PDS000003443.105	SRR21380953	NCBI_v_CSP1	4.95283	2.54627	5	-0.038	9.943	Inlier
Ecoli	Ec_PDS000003443.105	SRR21380953	NCBI_v_CSP2	4.50943	2.35936	5	-0.115	9.134	Inlier
Ecoli	Ec_PDS000003443.105	SRR21770752	CSP1_v_CSP2	-1.40566	0.913166	-1	-3.195	0.384	Inlier
Ecoli	Ec_PDS000003443.105	SRR21770752	NCBI_v_CSP1	3.57547	1.89711	3	-0.143	7.294	Inlier
Ecoli	Ec_PDS000003443.105	SRR21770752	NCBI_v_CSP2	2.16981	1.92958	2	-1.612	5.952	Inlier
Ecoli	Ec_PDS000003443.105	SRR2177962	CSP1_v_CSP2	-0.40566	0.963904	0	-2.295	1.484	Inlier
Ecoli	Ec_PDS000003443.105	SRR2177962	NCBI_v_CSP1	9.53774	1.48115	10	6.635	12.441	Inlier
Ecoli	Ec_PDS000003443.105	SRR2177962	NCBI_v_CSP2	9.13208	1.33862	9	6.508	11.756	Inlier
Ecoli	Ec_PDS000003443.105	SRR21949047	CSP1_v_CSP2	-2.31132	0.865896	-3	-4.008	-0.614	Inlier
Ecoli	Ec_PDS000003443.105	SRR21949047	NCBI_v_CSP1	3.9717	1.66452	4	0.709	7.234	Inlier
Ecoli	Ec_PDS000003443.105	SRR21949047	NCBI_v_CSP2	1.66038	1.53615	2	-1.35	4.671	Inlier
Ecoli	Ec_PDS000003443.105	SRR22048883	CSP1_v_CSP2	-0.433962	0.873077	-1	-2.145	1.277	Inlier
Ecoli	Ec_PDS000003443.105	SRR22048883	NCBI_v_CSP1	3.89623	2.40606	3	-0.82	8.612	Inlier
Ecoli	Ec_PDS000003443.105	SRR22048883	NCBI_v_CSP2	3.46226	2.31012	3	-1.065	7.99	Inlier
Ecoli	Ec_PDS000003443.105	SRR22176211	CSP1_v_CSP2	-0.179245	0.923731	0	-1.99	1.631	Inlier
Ecoli	Ec_PDS000003443.105	SRR22176211	NCBI_v_CSP1	4.68868	2.41962	5	-0.054	9.431	Inlier
Ecoli	Ec_PDS000003443.105	SRR22176211	NCBI_v_CSP2	4.50943	2.34316	5	-0.083	9.102	Inlier
Ecoli	Ec_PDS000003443.105	SRR22321943	CSP1_v_CSP2	0.679245	0.92115	1	-1.126	2.485	Inlier
Ecoli	Ec_PDS000003443.105	SRR22321943	NCBI_v_CSP1	2.70755	1.80985	3	-0.84	6.255	Inlier
Ecoli	Ec_PDS000003443.105	SRR22321943	NCBI_v_CSP2	3.38679	1.84427	3	-0.228	7.002	Inlier
Ecoli	Ec_PDS000003443.105	SRR22373267	CSP1_v_CSP2	-0.0566038	1.1533	0	-2.317	2.204	Inlier
Ecoli	Ec_PDS000003443.105	SRR22373267	NCBI_v_CSP1	2.38679	1.91023	2	-1.357	6.131	Inlier
Ecoli	Ec_PDS000003443.105	SRR22373267	NCBI_v_CSP2	2.33019	1.64879	2	-0.901	5.562	Inlier
Ecoli	Ec_PDS000003443.105	SRR22733675	CSP1_v_CSP2	-0.518868	0.819188	0	-2.124	1.087	Inlier
Ecoli	Ec_PDS000003443.105	SRR22733675	NCBI_v_CSP1	4.17925	2.45259	4.5	-0.628	8.986	Inlier
Ecoli	Ec_PDS000003443.105	SRR22733675	NCBI_v_CSP2	3.66038	2.25467	4	-0.759	8.079	Inlier
Ecoli	Ec_PDS000003443.105	SRR23194067	CSP1_v_CSP2	-0.518868	0.819188	0	-2.124	1.087	Inlier
Ecoli	Ec_PDS000003443.105	SRR23194067	NCBI_v_CSP1	4.92453	2.62478	5	-0.22	10.069	Inlier
Ecoli	Ec_PDS000003443.105	SRR23194067	NCBI_v_CSP2	4.40566	2.39753	5	-0.293	9.105	Inlier
Ecoli	Ec_PDS000003443.105	SRR2417052	CSP1_v_CSP2	-0.509434	0.864598	0	-2.204	1.185	Inlier
Ecoli	Ec_PDS000003443.105	SRR2417052	NCBI_v_CSP1	3.77358	1.83761	4	0.172	7.375	Inlier
Ecoli	Ec_PDS000003443.105	SRR2417052	NCBI_v_CSP2	3.26415	1.9435	3	-0.545	7.073	Inlier
Ecoli	Ec_PDS000003443.105	SRR2481253	CSP1_v_CSP2	-1.19811	0.866518	-1	-2.896	0.5	Inlier
Ecoli	Ec_PDS000003443.105	SRR2481253	NCBI_v_CSP1	4.98113	1.80993	5	1.434	8.529	Inlier
Ecoli	Ec_PDS000003443.105	SRR2481253	NCBI_v_CSP2	3.78302	1.96641	3	-0.071	7.637	Inlier
Ecoli	Ec_PDS000003443.105	SRR25028276	CSP1_v_CSP2	-0.443396	0.905856	-1	-2.219	1.332	Inlier
Ecoli	Ec_PDS000003443.105	SRR25028276	NCBI_v_CSP1	2.73585	1.8221	3	-0.835	6.307	Inlier
Ecoli	Ec_PDS000003443.105	SRR25028276	NCBI_v_CSP2	2.29245	1.66171	2	-0.964	5.549	Inlier
Ecoli	Ec_PDS000003443.105	SRR25265459	CSP1_v_CSP2	-1.5283	0.85309	-2	-3.2	0.144	Inlier
Ecoli	Ec_PDS000003443.105	SRR25265459	NCBI_v_CSP1	3.40566	2.19861	3	-0.904	7.715	Inlier
Ecoli	Ec_PDS000003443.105	SRR25265459	NCBI_v_CSP2	1.87736	2.01283	1.5	-2.068	5.822	Inlier
Ecoli	Ec_PDS000003443.105	SRR25599303	CSP1_v_CSP2	-2.0566	1.10264	-2	-4.218	0.105	Inlier
Ecoli	Ec_PDS000003443.105	SRR25599303	NCBI_v_CSP1	2.56604	1.85174	2	-1.063	6.195	Inlier
Ecoli	Ec_PDS000003443.105	SRR25599303	NCBI_v_CSP2	0.509434	1.58712	0	-2.601	3.62	Inlier
Ecoli	Ec_PDS000003443.105	SRR25724455	CSP1_v_CSP2	-0.471698	0.885949	-1	-2.208	1.265	Inlier
Ecoli	Ec_PDS000003443.105	SRR25724455	NCBI_v_CSP1	2.11321	1.658	2	-1.136	5.363	Inlier
Ecoli	Ec_PDS000003443.105	SRR25724455	NCBI_v_CSP2	1.64151	1.53181	1.5	-1.361	4.644	Inlier
Ecoli	Ec_PDS000003443.105	SRR25777584	CSP1_v_CSP2	-0.528302	0.864182	-1	-2.222	1.165	Inlier
Ecoli	Ec_PDS000003443.105	SRR25777584	NCBI_v_CSP1	3.34906	1.7784	3	-0.137	6.835	Inlier
Ecoli	Ec_PDS000003443.105	SRR25777584	NCBI_v_CSP2	2.82075	1.78777	3	-0.683	6.325	Inlier
Ecoli	Ec_PDS000003443.105	SRR4176412	CSP1_v_CSP2	-0.54717	0.86335	-1	-2.239	1.145	Inlier
Ecoli	Ec_PDS000003443.105	SRR4176412	NCBI_v_CSP1	3.5283	2.07574	3	-0.54	7.597	Inlier
Ecoli	Ec_PDS000003443.105	SRR4176412	NCBI_v_CSP2	2.98113	2.06089	3	-1.058	7.02	Inlier
Ecoli	Ec_PDS000003443.105	SRR4345514	CSP1_v_CSP2	-2.33962	1.01312	-2.5	-4.325	-0.354	Inlier
Ecoli	Ec_PDS000003443.105	SRR4345514	NCBI_v_CSP1	6.43396	1.99532	6	2.523	10.345	Inlier
Ecoli	Ec_PDS000003443.105	SRR4345514	NCBI_v_CSP2	4.09434	1.88996	4	0.39	7.799	Inlier
Ecoli	Ec_PDS000003443.105	SRR4346740	CSP1_v_CSP2	-0.40566	0.943936	-1	-2.256	1.444	Inlier
Ecoli	Ec_PDS000003443.105	SRR4346740	NCBI_v_CSP1	2.50943	2.12578	2	-1.657	6.676	Inlier
Ecoli	Ec_PDS000003443.105	SRR4346740	NCBI_v_CSP2	2.10377	2.06526	2	-1.944	6.152	Inlier
Ecoli	Ec_PDS000003443.105	SRR5832133	CSP1_v_CSP2	-0.367925	0.939356	0	-2.209	1.473	Inlier
Ecoli	Ec_PDS000003443.105	SRR5832133	NCBI_v_CSP1	2.71698	1.82446	3	-0.859	6.293	Inlier
Ecoli	Ec_PDS000003443.105	SRR5832133	NCBI_v_CSP2	2.34906	1.97625	2	-1.524	6.222	Inlier
Ecoli	Ec_PDS000003443.105	SRR6178014	CSP1_v_CSP2	-0.54717	0.852247	-1	-2.218	1.123	Inlier
Ecoli	Ec_PDS000003443.105	SRR6178014	NCBI_v_CSP1	3	2.3624	2	-1.63	7.63	Inlier
Ecoli	Ec_PDS000003443.105	SRR6178014	NCBI_v_CSP2	2.45283	2.24725	2	-1.952	6.857	Inlier
Ecoli	Ec_PDS000003443.105	SRR6228867	CSP1_v_CSP2	-0.95283	0.748103	-1	-2.419	0.513	Inlier
Ecoli	Ec_PDS000003443.105	SRR6228867	NCBI_v_CSP1	3.46226	2.08931	3	-0.633	7.557	Inlier
Ecoli	Ec_PDS000003443.105	SRR6228867	NCBI_v_CSP2	2.50943	2.14807	2	-1.701	6.72	Inlier
Ecoli	Ec_PDS000003443.105	SRR6314040	CSP1_v_CSP2	-0.566038	0.828296	0	-2.189	1.057	Inlier
Ecoli	Ec_PDS000003443.105	SRR6314040	NCBI_v_CSP1	2.84906	1.82466	3	-0.727	6.425	Inlier
Ecoli	Ec_PDS000003443.105	SRR6314040	NCBI_v_CSP2	2.28302	1.92108	2	-1.482	6.048	Inlier
Ecoli	Ec_PDS000003443.105	SRR6799233	CSP1_v_CSP2	-0.650943	0.816992	-1	-2.252	0.95	Inlier
Ecoli	Ec_PDS000003443.105	SRR6799233	NCBI_v_CSP1	4.70755	2.46487	4	-0.124	9.539	Inlier
Ecoli	Ec_PDS000003443.105	SRR6799233	NCBI_v_CSP2	4.0566	2.3818	3	-0.612	8.725	Inlier
Ecoli	Ec_PDS000003443.105	SRR7155576	CSP1_v_CSP2	-0.311321	0.959794	0	-2.192	1.57	Inlier
Ecoli	Ec_PDS000003443.105	SRR7155576	NCBI_v_CSP1	3.79245	2.38933	3	-0.891	8.475	Inlier
Ecoli	Ec_PDS000003443.105	SRR7155576	NCBI_v_CSP2	3.48113	2.24343	3	-0.916	7.878	Inlier
Ecoli	Ec_PDS000003443.105	SRR7244181	CSP1_v_CSP2	-0.320755	1.07391	0	-2.426	1.784	Inlier
Ecoli	Ec_PDS000003443.105	SRR7244181	NCBI_v_CSP1	3.50943	1.86826	3	-0.152	7.171	Inlier
Ecoli	Ec_PDS000003443.105	SRR7244181	NCBI_v_CSP2	3.18868	2.24717	2	-1.216	7.593	Inlier
Ecoli	Ec_PDS000003443.105	SRR7271448	CSP1_v_CSP2	-0.556604	0.829	0	-2.181	1.068	Inlier
Ecoli	Ec_PDS000003443.105	SRR7271448	NCBI_v_CSP1	3.16038	1.88799	3	-0.54	6.861	Inlier
Ecoli	Ec_PDS000003443.105	SRR7271448	NCBI_v_CSP2	2.60377	2.08705	2	-1.487	6.694	Inlier
Ecoli	Ec_PDS000003443.105	SRR7439143	CSP1_v_CSP2	-0.40566	0.983466	-1	-2.333	1.522	Inlier
Ecoli	Ec_PDS000003443.105	SRR7439143	NCBI_v_CSP1	3.9434	2.01816	4	-0.012	7.899	Inlier
Ecoli	Ec_PDS000003443.105	SRR7439143	NCBI_v_CSP2	3.53774	2.08931	3.5	-0.557	7.633	Inlier
Ecoli	Ec_PDS000003443.105	SRR7544665	CSP1_v_CSP2	-1.37736	0.989977	-2	-3.318	0.563	Inlier
Ecoli	Ec_PDS000003443.105	SRR7544665	NCBI_v_CSP1	4.00943	2.00236	4	0.085	7.934	Inlier
Ecoli	Ec_PDS000003443.105	SRR7544665	NCBI_v_CSP2	2.63208	2.09455	3	-1.473	6.737	Inlier
Ecoli	Ec_PDS000003443.105	SRR7726371	CSP1_v_CSP2	-0.443396	0.905856	-1	-2.219	1.332	Inlier
Ecoli	Ec_PDS000003443.105	SRR7726371	NCBI_v_CSP1	3.04717	1.68682	3	-0.259	6.353	Inlier
Ecoli	Ec_PDS000003443.105	SRR7726371	NCBI_v_CSP2	2.60377	1.55948	2	-0.453	5.66	Inlier
Ecoli	Ec_PDS000003443.105	SRR7825959	CSP1_v_CSP2	1.9434	1.1533	2	-0.317	4.204	Inlier
Ecoli	Ec_PDS000003443.105	SRR7825959	NCBI_v_CSP1	5.46226	1.65716	5	2.214	8.71	Inlier
Ecoli	Ec_PDS000003443.105	SRR7825959	NCBI_v_CSP2	7.40566	1.51046	8	4.445	10.366	Inlier
Ecoli	Ec_PDS000003443.105	SRR7894989	CSP1_v_CSP2	-0.981132	0.904814	-1	-2.755	0.792	Inlier
Ecoli	Ec_PDS000003443.105	SRR7894989	NCBI_v_CSP1	5.63208	1.68085	6	2.338	8.926	Inlier
Ecoli	Ec_PDS000003443.105	SRR7894989	NCBI_v_CSP2	4.65094	1.70178	5	1.316	7.986	Inlier
Ecoli	Ec_PDS000003443.105	SRR7909686	CSP1_v_CSP2	-1.06604	1.06251	-1	-3.149	1.016	Inlier
Ecoli	Ec_PDS000003443.105	SRR7909686	NCBI_v_CSP1	4.18868	1.87776	4	0.508	7.869	Inlier
Ecoli	Ec_PDS000003443.105	SRR7909686	NCBI_v_CSP2	3.12264	2.2539	3	-1.295	7.54	Inlier
Ecoli	Ec_PDS000003443.105	SRR7992392	CSP1_v_CSP2	-1.10377	1.09483	-1	-3.25	1.042	Inlier
Ecoli	Ec_PDS000003443.105	SRR7992392	NCBI_v_CSP1	4.24528	2.19007	4	-0.047	8.538	Inlier
Ecoli	Ec_PDS000003443.105	SRR7992392	NCBI_v_CSP2	3.14151	2.56511	2	-1.886	8.169	Inlier
Ecoli	Ec_PDS000003443.105	SRR8192807	CSP1_v_CSP2	-1.33019	1.00211	-2	-3.294	0.634	Inlier
Ecoli	Ec_PDS000003443.105	SRR8192807	NCBI_v_CSP1	3.78302	2.49573	3	-1.109	8.675	Inlier
Ecoli	Ec_PDS000003443.105	SRR8192807	NCBI_v_CSP2	2.45283	2.25993	2	-1.977	6.882	Inlier
Ecoli	Ec_PDS000003443.105	SRR9158332	CSP1_v_CSP2	-1.37736	1.05517	-2	-3.445	0.691	Inlier
Ecoli	Ec_PDS000003443.105	SRR9158332	NCBI_v_CSP1	5.51887	2.02005	5	1.56	9.478	Inlier
Ecoli	Ec_PDS000003443.105	SRR9158332	NCBI_v_CSP2	4.14151	1.85903	4	0.498	7.785	Inlier
Ecoli	Ec_PDS000003657.110	SRR10082272	CSP1_v_CSP2	-2.0101	1.57464	-2	-5.096	1.076	Inlier
Ecoli	Ec_PDS000003657.110	SRR10082272	NCBI_v_CSP1	2.74747	2.16344	2	-1.493	6.988	Inlier
Ecoli	Ec_PDS000003657.110	SRR10082272	NCBI_v_CSP2	0.737374	1.71777	1	-2.629	4.104	Inlier
Ecoli	Ec_PDS000003657.110	SRR10355651	CSP1_v_CSP2	-1.63636	1.52833	-2	-4.632	1.359	Inlier
Ecoli	Ec_PDS000003657.110	SRR10355651	NCBI_v_CSP1	2.65657	1.87443	3	-1.017	6.33	Inlier
Ecoli	Ec_PDS000003657.110	SRR10355651	NCBI_v_CSP2	1.0202	1.47759	1	-1.876	3.916	Inlier
Ecoli	Ec_PDS000003657.110	SRR10987315	CSP1_v_CSP2	-2.21212	1.66766	-2	-5.481	1.056	Inlier
Ecoli	Ec_PDS000003657.110	SRR10987315	NCBI_v_CSP1	2.56566	1.9596	3	-1.275	6.406	Inlier
Ecoli	Ec_PDS000003657.110	SRR10987315	NCBI_v_CSP2	0.353535	1.68616	0	-2.951	3.658	Inlier
Ecoli	Ec_PDS000003657.110	SRR11772634	CSP1_v_CSP2	-1.39394	1.65257	-1	-4.633	1.845	Inlier
Ecoli	Ec_PDS000003657.110	SRR11772634	NCBI_v_CSP1	2.15152	2.224	2	-2.207	6.51	Inlier
Ecoli	Ec_PDS000003657.110	SRR11772634	NCBI_v_CSP2	0.757576	1.67874	1	-2.533	4.048	Inlier
Ecoli	Ec_PDS000003657.110	SRR11955096	CSP1_v_CSP2	-1.74747	1.60575	-2	-4.895	1.4	Inlier
Ecoli	Ec_PDS000003657.110	SRR11955096	NCBI_v_CSP1	2.43434	2.25045	2	-1.976	6.845	Inlier
Ecoli	Ec_PDS000003657.110	SRR11955096	NCBI_v_CSP2	0.686869	1.6391	0	-2.526	3.899	Inlier
Ecoli	Ec_PDS000003657.110	SRR12026541	CSP1_v_CSP2	-0.848485	1.62483	-1	-4.033	2.336	Inlier
Ecoli	Ec_PDS000003657.110	SRR12026541	NCBI_v_CSP1	1.62626	2.25237	1	-2.788	6.041	Inlier
Ecoli	Ec_PDS000003657.110	SRR12026541	NCBI_v_CSP2	0.777778	1.69366	1	-2.542	4.097	Inlier
Ecoli	Ec_PDS000003657.110	SRR12077128	CSP1_v_CSP2	-1.87879	1.6053	-2	-5.025	1.268	Inlier
Ecoli	Ec_PDS000003657.110	SRR12077128	NCBI_v_CSP1	3.55556	2.28224	3	-0.918	8.029	Inlier
Ecoli	Ec_PDS000003657.110	SRR12077128	NCBI_v_CSP2	1.67677	1.67715	2	-1.61	4.964	Inlier
Ecoli	Ec_PDS000003657.110	SRR12526223	CSP1_v_CSP2	-1.80808	1.6823	-2	-5.105	1.489	Inlier
Ecoli	Ec_PDS000003657.110	SRR12526223	NCBI_v_CSP1	4.62626	2.27939	4	0.159	9.094	Inlier
Ecoli	Ec_PDS000003657.110	SRR12526223	NCBI_v_CSP2	2.81818	1.75176	3	-0.615	6.252	Inlier
Ecoli	Ec_PDS000003657.110	SRR12571032	CSP1_v_CSP2	-2.0303	1.35868	-2	-4.693	0.633	Inlier
Ecoli	Ec_PDS000003657.110	SRR12571032	NCBI_v_CSP1	2.77778	1.69967	3	-0.554	6.109	Inlier
Ecoli	Ec_PDS000003657.110	SRR12571032	NCBI_v_CSP2	0.747475	1.66196	1	-2.51	4.005	Inlier
Ecoli	Ec_PDS000003657.110	SRR12595398	CSP1_v_CSP2	-2.16162	1.29919	-2	-4.708	0.385	Inlier
Ecoli	Ec_PDS000003657.110	SRR12595398	NCBI_v_CSP1	3.61616	1.71849	3	0.248	6.984	Inlier
Ecoli	Ec_PDS000003657.110	SRR12595398	NCBI_v_CSP2	1.45455	1.71591	1	-1.909	4.818	Inlier
Ecoli	Ec_PDS000003657.110	SRR12623538	CSP1_v_CSP2	-2.05051	1.36557	-2	-4.727	0.626	Inlier
Ecoli	Ec_PDS000003657.110	SRR12623538	NCBI_v_CSP1	2.77778	1.69967	3	-0.554	6.109	Inlier
Ecoli	Ec_PDS000003657.110	SRR12623538	NCBI_v_CSP2	0.727273	1.64017	1	-2.487	3.942	Inlier
Ecoli	Ec_PDS000003657.110	SRR12829143	CSP1_v_CSP2	-2.43434	1.53969	-3	-5.452	0.583	Inlier
Ecoli	Ec_PDS000003657.110	SRR12829143	NCBI_v_CSP1	3.66667	1.87899	4	-0.016	7.349	Inlier
Ecoli	Ec_PDS000003657.110	SRR12829143	NCBI_v_CSP2	1.23232	1.5507	1	-1.807	4.272	Inlier
Ecoli	Ec_PDS000003657.110	SRR13009901	CSP1_v_CSP2	3.32323	2.03955	4	-0.674	7.321	Inlier
Ecoli	Ec_PDS000003657.110	SRR13009901	NCBI_v_CSP1	1.69697	1.52164	1	-1.285	4.679	Inlier
Ecoli	Ec_PDS000003657.110	SRR13009901	NCBI_v_CSP2	5.0202	2.07993	5	0.944	9.097	Inlier
Ecoli	Ec_PDS000003657.110	SRR13125776	CSP1_v_CSP2	-1.73737	1.57523	-2	-4.825	1.35	Inlier
Ecoli	Ec_PDS000003657.110	SRR13125776	NCBI_v_CSP1	1.84848	2.11585	2	-2.298	5.995	Inlier
Ecoli	Ec_PDS000003657.110	SRR13125776	NCBI_v_CSP2	0.111111	1.74899	0	-3.317	3.539	Inlier
Ecoli	Ec_PDS000003657.110	SRR13132239	CSP1_v_CSP2	-0.727273	1.74273	-1	-4.143	2.688	Inlier
Ecoli	Ec_PDS000003657.110	SRR13132239	NCBI_v_CSP1	4.24242	2.19968	4	-0.069	8.554	Inlier
Ecoli	Ec_PDS000003657.110	SRR13132239	NCBI_v_CSP2	3.51515	1.79775	3	-0.008	7.039	Inlier
Ecoli	Ec_PDS000003657.110	SRR13156848	CSP1_v_CSP2	-1.53535	1.54069	-2	-4.555	1.484	Inlier
Ecoli	Ec_PDS000003657.110	SRR13156848	NCBI_v_CSP1	2.53535	1.87526	3	-1.14	6.211	Inlier
Ecoli	Ec_PDS000003657.110	SRR13156848	NCBI_v_CSP2	1	1.44279	1	-1.828	3.828	Inlier
Ecoli	Ec_PDS000003657.110	SRR13232985	CSP1_v_CSP2	-2.0202	1.61612	-2	-5.188	1.147	Inlier
Ecoli	Ec_PDS000003657.110	SRR13232985	NCBI_v_CSP1	2.69697	2.20137	2	-1.618	7.012	Inlier
Ecoli	Ec_PDS000003657.110	SRR13232985	NCBI_v_CSP2	0.676768	1.93163	0	-3.109	4.463	Inlier
Ecoli	Ec_PDS000003657.110	SRR13415138	CSP1_v_CSP2	-1.26263	1.69384	-2	-4.582	2.057	Inlier
Ecoli	Ec_PDS000003657.110	SRR13415138	NCBI_v_CSP1	4.50505	1.93451	5	0.713	8.297	Inlier
Ecoli	Ec_PDS000003657.110	SRR13415138	NCBI_v_CSP2	3.24242	1.27848	3	0.737	5.748	Inlier
Ecoli	Ec_PDS000003657.110	SRR13439758	CSP1_v_CSP2	-3.83838	1.65188	-4	-7.076	-0.601	Inlier
Ecoli	Ec_PDS000003657.110	SRR13439758	NCBI_v_CSP1	3.57576	2.29058	3	-0.914	8.065	Inlier
Ecoli	Ec_PDS000003657.110	SRR13439758	NCBI_v_CSP2	-0.262626	1.6573	0	-3.511	2.986	Inlier
Ecoli	Ec_PDS000003657.110	SRR14033141	CSP1_v_CSP2	-1.43434	1.56598	-2	-4.504	1.635	Inlier
Ecoli	Ec_PDS000003657.110	SRR14033141	NCBI_v_CSP1	3.28283	1.87377	4	-0.39	6.955	Inlier
Ecoli	Ec_PDS000003657.110	SRR14033141	NCBI_v_CSP2	1.84848	1.2886	2	-0.677	4.374	Inlier
Ecoli	Ec_PDS000003657.110	SRR14662264	CSP1_v_CSP2	-0.909091	1.62312	-1	-4.09	2.272	Inlier
Ecoli	Ec_PDS000003657.110	SRR14662264	NCBI_v_CSP1	1.73737	2.14565	1	-2.468	5.943	Inlier
Ecoli	Ec_PDS000003657.110	SRR14662264	NCBI_v_CSP2	0.828283	1.63533	1	-2.377	4.033	Inlier
Ecoli	Ec_PDS000003657.110	SRR14677844	CSP1_v_CSP2	-1.86869	1.5429	-2	-4.893	1.155	Inlier
Ecoli	Ec_PDS000003657.110	SRR14677844	NCBI_v_CSP1	2.74747	2.24219	2	-1.647	7.142	Inlier
Ecoli	Ec_PDS000003657.110	SRR14677844	NCBI_v_CSP2	0.878788	1.88589	1	-2.817	4.575	Inlier
Ecoli	Ec_PDS000003657.110	SRR15006018	CSP1_v_CSP2	-0.89899	1.56162	-1	-3.96	2.162	Inlier
Ecoli	Ec_PDS000003657.110	SRR15006018	NCBI_v_CSP1	5.25253	2.37909	5	0.59	9.915	Inlier
Ecoli	Ec_PDS000003657.110	SRR15006018	NCBI_v_CSP2	4.35354	1.66177	4	1.097	7.611	Inlier
Ecoli	Ec_PDS000003657.110	SRR15058714	CSP1_v_CSP2	-0.272727	1.57673	0	-3.363	2.818	Inlier
Ecoli	Ec_PDS000003657.110	SRR15058714	NCBI_v_CSP1	5.54545	2.12983	5	1.371	9.72	Inlier
Ecoli	Ec_PDS000003657.110	SRR15058714	NCBI_v_CSP2	5.27273	1.85614	5	1.635	8.911	Inlier
Ecoli	Ec_PDS000003657.110	SRR15128323	CSP1_v_CSP2	0.161616	1.74208	0	-3.253	3.576	Inlier
Ecoli	Ec_PDS000003657.110	SRR15128323	NCBI_v_CSP1	1.69697	2.21523	1	-2.645	6.039	Inlier
Ecoli	Ec_PDS000003657.110	SRR15128323	NCBI_v_CSP2	1.85859	1.67825	2	-1.431	5.148	Inlier
Ecoli	Ec_PDS000003657.110	SRR15139189	CSP1_v_CSP2	0.323232	1.55726	0	-2.729	3.375	Inlier
Ecoli	Ec_PDS000003657.110	SRR15139189	NCBI_v_CSP1	1.77778	2.15025	1	-2.437	5.992	Inlier
Ecoli	Ec_PDS000003657.110	SRR15139189	NCBI_v_CSP2	2.10101	1.71723	2	-1.265	5.467	Inlier
Ecoli	Ec_PDS000003657.110	SRR15158362	CSP1_v_CSP2	0.020202	1.6287	0	-3.172	3.212	Inlier
Ecoli	Ec_PDS000003657.110	SRR15158362	NCBI_v_CSP1	1.77778	2.16444	1	-2.464	6.02	Inlier
Ecoli	Ec_PDS000003657.110	SRR15158362	NCBI_v_CSP2	1.79798	1.64738	2	-1.431	5.027	Inlier
Ecoli	Ec_PDS000003657.110	SRR15194060	CSP1_v_CSP2	-0.141414	1.52536	0	-3.131	2.848	Inlier
Ecoli	Ec_PDS000003657.110	SRR15194060	NCBI_v_CSP1	2.62626	2.21122	2	-1.708	6.96	Inlier
Ecoli	Ec_PDS000003657.110	SRR15194060	NCBI_v_CSP2	2.48485	1.76337	2	-0.971	5.941	Inlier
Ecoli	Ec_PDS000003657.110	SRR15238040	CSP1_v_CSP2	0.20202	1.70222	0	-3.134	3.538	Inlier
Ecoli	Ec_PDS000003657.110	SRR15238040	NCBI_v_CSP1	0.434343	2.24136	0	-3.959	4.827	Inlier
Ecoli	Ec_PDS000003657.110	SRR15238040	NCBI_v_CSP2	0.636364	1.63167	1	-2.562	3.834	Inlier
Ecoli	Ec_PDS000003657.110	SRR15494912	CSP1_v_CSP2	-0.676768	1.76027	-1	-4.127	2.773	Inlier
Ecoli	Ec_PDS000003657.110	SRR15494912	NCBI_v_CSP1	1.61616	2.23929	1	-2.773	6.005	Inlier
Ecoli	Ec_PDS000003657.110	SRR15494912	NCBI_v_CSP2	0.939394	1.73098	1	-2.453	4.332	Inlier
Ecoli	Ec_PDS000003657.110	SRR15512231	CSP1_v_CSP2	-0.909091	1.7848	-1	-4.407	2.589	Inlier
Ecoli	Ec_PDS000003657.110	SRR15512231	NCBI_v_CSP1	3.60606	2.16568	3	-0.639	7.851	Inlier
Ecoli	Ec_PDS000003657.110	SRR15512231	NCBI_v_CSP2	2.69697	1.76967	2	-0.772	6.165	Inlier
Ecoli	Ec_PDS000003657.110	SRR15571342	CSP1_v_CSP2	-4.27273	1.42727	-4	-7.07	-1.475	Inlier
Ecoli	Ec_PDS000003657.110	SRR15571342	NCBI_v_CSP1	6.42424	1.90108	6	2.698	10.15	Inlier
Ecoli	Ec_PDS000003657.110	SRR15571342	NCBI_v_CSP2	2.15152	1.95544	2	-1.681	5.984	Inlier
Ecoli	Ec_PDS000003657.110	SRR16652524	CSP1_v_CSP2	-0.818182	1.66208	-1	-4.076	2.439	Inlier
Ecoli	Ec_PDS000003657.110	SRR16652524	NCBI_v_CSP1	0.636364	2.25178	0	-3.777	5.05	Inlier
Ecoli	Ec_PDS000003657.110	SRR16652524	NCBI_v_CSP2	-0.181818	1.60588	0	-3.329	2.966	Inlier
Ecoli	Ec_PDS000003657.110	SRR17120386	CSP1_v_CSP2	-1.17172	1.66623	-1	-4.437	2.094	Inlier
Ecoli	Ec_PDS000003657.110	SRR17120386	NCBI_v_CSP1	1.30303	1.95069	1	-2.52	5.126	Inlier
Ecoli	Ec_PDS000003657.110	SRR17120386	NCBI_v_CSP2	0.131313	1.75921	0	-3.317	3.579	Inlier
Ecoli	Ec_PDS000003657.110	SRR17529629	CSP1_v_CSP2	-0.010101	1.55508	0	-3.058	3.038	Inlier
Ecoli	Ec_PDS000003657.110	SRR17529629	NCBI_v_CSP1	1.89899	2.19226	2	-2.398	6.196	Inlier
Ecoli	Ec_PDS000003657.110	SRR17529629	NCBI_v_CSP2	1.88889	1.62185	2	-1.29	5.068	Inlier
Ecoli	Ec_PDS000003657.110	SRR18272222	CSP1_v_CSP2	0.969697	1.64413	1	-2.253	4.192	Inlier
Ecoli	Ec_PDS000003657.110	SRR18272222	NCBI_v_CSP1	1.72727	2.23067	1	-2.645	6.099	Inlier
Ecoli	Ec_PDS000003657.110	SRR18272222	NCBI_v_CSP2	2.69697	1.66877	2	-0.574	5.968	Inlier
Ecoli	Ec_PDS000003657.110	SRR18506926	CSP1_v_CSP2	-0.0606061	1.53076	0	-3.061	2.94	Inlier
Ecoli	Ec_PDS000003657.110	SRR18506926	NCBI_v_CSP1	2.50505	2.24687	2	-1.899	6.909	Inlier
Ecoli	Ec_PDS000003657.110	SRR18506926	NCBI_v_CSP2	2.44444	1.70367	2	-0.895	5.784	Inlier
Ecoli	Ec_PDS000003657.110	SRR19869764	CSP1_v_CSP2	-0.909091	1.63564	-1	-4.115	2.297	Inlier
Ecoli	Ec_PDS000003657.110	SRR19869764	NCBI_v_CSP1	1.77778	2.13119	1	-2.399	5.955	Inlier
Ecoli	Ec_PDS000003657.110	SRR19869764	NCBI_v_CSP2	0.868687	1.83307	1	-2.724	4.461	Inlier
Ecoli	Ec_PDS000003657.110	SRR19901293	CSP1_v_CSP2	-1.31313	1.68212	-1	-4.61	1.984	Inlier
Ecoli	Ec_PDS000003657.110	SRR19901293	NCBI_v_CSP1	1.72727	2.13244	1	-2.452	5.907	Inlier
Ecoli	Ec_PDS000003657.110	SRR19901293	NCBI_v_CSP2	0.414141	2.00005	0	-3.506	4.334	Inlier
Ecoli	Ec_PDS000003657.110	SRR20000509	CSP1_v_CSP2	2.07071	1.56657	2	-1	5.141	Inlier
Ecoli	Ec_PDS000003657.110	SRR20000509	NCBI_v_CSP1	-0.0909091	2.18105	0	-4.366	4.184	Inlier
Ecoli	Ec_PDS000003657.110	SRR20000509	NCBI_v_CSP2	1.9798	1.58423	2	-1.125	5.085	Inlier
Ecoli	Ec_PDS000003657.110	SRR20006889	CSP1_v_CSP2	-0.676768	1.76027	-1	-4.127	2.773	Inlier
Ecoli	Ec_PDS000003657.110	SRR20006889	NCBI_v_CSP1	1.61616	2.23929	1	-2.773	6.005	Inlier
Ecoli	Ec_PDS000003657.110	SRR20006889	NCBI_v_CSP2	0.939394	1.70724	1	-2.407	4.286	Inlier
Ecoli	Ec_PDS000003657.110	SRR2102958	CSP1_v_CSP2	-1.42424	1.72077	-2	-4.797	1.948	Inlier
Ecoli	Ec_PDS000003657.110	SRR2102958	NCBI_v_CSP1	3.37374	1.91975	4	-0.389	7.136	Inlier
Ecoli	Ec_PDS000003657.110	SRR2102958	NCBI_v_CSP2	1.94949	1.41691	2	-0.828	4.727	Inlier
Ecoli	Ec_PDS000003657.110	SRR21187533	CSP1_v_CSP2	-1.61616	1.59532	-2	-4.743	1.511	Inlier
Ecoli	Ec_PDS000003657.110	SRR21187533	NCBI_v_CSP1	1.71717	2.19015	1	-2.575	6.01	Inlier
Ecoli	Ec_PDS000003657.110	SRR21187533	NCBI_v_CSP2	0.10101	1.75833	0	-3.345	3.547	Inlier
Ecoli	Ec_PDS000003657.110	SRR21224013	CSP1_v_CSP2	-1.44444	1.68561	-1	-4.748	1.859	Inlier
Ecoli	Ec_PDS000003657.110	SRR21224013	NCBI_v_CSP1	3.58586	2.07517	3	-0.481	7.653	Inlier
Ecoli	Ec_PDS000003657.110	SRR21224013	NCBI_v_CSP2	2.14141	1.44991	2	-0.7	4.983	Inlier
Ecoli	Ec_PDS000003657.110	SRR21227990	CSP1_v_CSP2	-0.858586	1.61631	-1	-4.026	2.309	Inlier
Ecoli	Ec_PDS000003657.110	SRR21227990	NCBI_v_CSP1	1.58586	2.23611	1	-2.797	5.969	Inlier
Ecoli	Ec_PDS000003657.110	SRR21227990	NCBI_v_CSP2	0.727273	1.73098	1	-2.665	4.12	Inlier
Ecoli	Ec_PDS000003657.110	SRR21411096	CSP1_v_CSP2	1.49495	1.5477	1	-1.538	4.528	Inlier
Ecoli	Ec_PDS000003657.110	SRR21411096	NCBI_v_CSP1	0.30303	2.10662	0	-3.826	4.432	Inlier
Ecoli	Ec_PDS000003657.110	SRR21411096	NCBI_v_CSP2	1.79798	1.65973	2	-1.455	5.051	Inlier
Ecoli	Ec_PDS000003657.110	SRR21841250	CSP1_v_CSP2	-1.08081	1.58872	-1	-4.195	2.033	Inlier
Ecoli	Ec_PDS000003657.110	SRR21841250	NCBI_v_CSP1	0.969697	2.21983	1	-3.381	5.32	Inlier
Ecoli	Ec_PDS000003657.110	SRR21841250	NCBI_v_CSP2	-0.111111	1.71957	0	-3.481	3.259	Inlier
Ecoli	Ec_PDS000003657.110	SRR22177958	CSP1_v_CSP2	-1.60606	1.58962	-2	-4.722	1.51	Inlier
Ecoli	Ec_PDS000003657.110	SRR22177958	NCBI_v_CSP1	1.59596	2.18958	1	-2.696	5.887	Inlier
Ecoli	Ec_PDS000003657.110	SRR22177958	NCBI_v_CSP2	-0.010101	1.69931	0	-3.341	3.32	Inlier
Ecoli	Ec_PDS000003657.110	SRR22257275	CSP1_v_CSP2	-0.10101	1.46033	0	-2.963	2.761	Inlier
Ecoli	Ec_PDS000003657.110	SRR22257275	NCBI_v_CSP1	2.64646	2.60421	2	-2.458	7.751	Inlier
Ecoli	Ec_PDS000003657.110	SRR22257275	NCBI_v_CSP2	2.54545	1.88589	2	-1.151	6.242	Inlier
Ecoli	Ec_PDS000003657.110	SRR22484224	CSP1_v_CSP2	-2.44444	1.66735	-3	-5.712	0.823	Inlier
Ecoli	Ec_PDS000003657.110	SRR22484224	NCBI_v_CSP1	4.47475	2.05209	5	0.453	8.497	Inlier
Ecoli	Ec_PDS000003657.110	SRR22484224	NCBI_v_CSP2	2.0303	1.43181	2	-0.776	4.837	Inlier
Ecoli	Ec_PDS000003657.110	SRR22484478	CSP1_v_CSP2	-2.44444	1.66735	-3	-5.712	0.823	Inlier
Ecoli	Ec_PDS000003657.110	SRR22484478	NCBI_v_CSP1	3.46465	2.04197	4	-0.538	7.467	Inlier
Ecoli	Ec_PDS000003657.110	SRR22484478	NCBI_v_CSP2	1.0202	1.40683	1	-1.737	3.778	Inlier
Ecoli	Ec_PDS000003657.110	SRR23598354	CSP1_v_CSP2	-0.838384	1.66419	-1	-4.1	2.423	Inlier
Ecoli	Ec_PDS000003657.110	SRR23598354	NCBI_v_CSP1	0.89899	2.19226	1	-3.398	5.196	Inlier
Ecoli	Ec_PDS000003657.110	SRR23598354	NCBI_v_CSP2	0.0606061	1.66487	0	-3.202	3.324	Inlier
Ecoli	Ec_PDS000003657.110	SRR24464976	CSP1_v_CSP2	1.18182	1.54764	1	-1.851	4.215	Inlier
Ecoli	Ec_PDS000003657.110	SRR24464976	NCBI_v_CSP1	-0.0909091	2.03586	0	-4.081	3.899	Inlier
Ecoli	Ec_PDS000003657.110	SRR24464976	NCBI_v_CSP2	1.09091	1.39307	1	-1.639	3.821	Inlier
Ecoli	Ec_PDS000003657.110	SRR24685379	CSP1_v_CSP2	-1.77778	1.77601	-2	-5.259	1.703	Inlier
Ecoli	Ec_PDS000003657.110	SRR24685379	NCBI_v_CSP1	3.48485	2.2784	3	-0.981	7.95	Inlier
Ecoli	Ec_PDS000003657.110	SRR24685379	NCBI_v_CSP2	1.70707	1.64287	2	-1.513	4.927	Inlier
Ecoli	Ec_PDS000003657.110	SRR25361622	CSP1_v_CSP2	-2.34343	1.75058	-3	-5.775	1.088	Inlier
Ecoli	Ec_PDS000003657.110	SRR25361622	NCBI_v_CSP1	3.46465	2.05194	4	-0.557	7.486	Inlier
Ecoli	Ec_PDS000003657.110	SRR25361622	NCBI_v_CSP2	1.12121	1.57967	1	-1.975	4.217	Inlier
Ecoli	Ec_PDS000003657.110	SRR25611739	CSP1_v_CSP2	-1.06061	1.69524	-1	-4.383	2.262	Inlier
Ecoli	Ec_PDS000003657.110	SRR25611739	NCBI_v_CSP1	1.87879	2.12023	1	-2.277	6.034	Inlier
Ecoli	Ec_PDS000003657.110	SRR25611739	NCBI_v_CSP2	0.818182	2.26942	1	-3.63	5.266	Inlier
Ecoli	Ec_PDS000003657.110	SRR25635029	CSP1_v_CSP2	-1.78788	1.71591	-2	-5.151	1.575	Inlier
Ecoli	Ec_PDS000003657.110	SRR25635029	NCBI_v_CSP1	2.07071	1.96007	2	-1.771	5.912	Inlier
Ecoli	Ec_PDS000003657.110	SRR25635029	NCBI_v_CSP2	0.282828	1.478	0	-2.614	3.18	Inlier
Ecoli	Ec_PDS000003657.110	SRR25644107	CSP1_v_CSP2	-0.0909091	1.72077	0	-3.464	3.282	Inlier
Ecoli	Ec_PDS000003657.110	SRR25644107	NCBI_v_CSP1	1.32323	2.22614	1	-3.04	5.686	Inlier
Ecoli	Ec_PDS000003657.110	SRR25644107	NCBI_v_CSP2	1.23232	1.74279	1	-2.183	4.648	Inlier
Ecoli	Ec_PDS000003657.110	SRR25725851	CSP1_v_CSP2	-1.0404	1.51805	-1	-4.016	1.935	Inlier
Ecoli	Ec_PDS000003657.110	SRR25725851	NCBI_v_CSP1	1.76768	2.11326	1	-2.374	5.91	Inlier
Ecoli	Ec_PDS000003657.110	SRR25725851	NCBI_v_CSP2	0.727273	1.65257	1	-2.512	3.966	Inlier
Ecoli	Ec_PDS000003657.110	SRR25843376	CSP1_v_CSP2	-0.575758	1.7848	-1	-4.074	2.922	Inlier
Ecoli	Ec_PDS000003657.110	SRR25843376	NCBI_v_CSP1	0.575758	2.13852	0	-3.616	4.767	Inlier
Ecoli	Ec_PDS000003657.110	SRR25843376	NCBI_v_CSP2	0	2.25425	0	-4.418	4.418	Inlier
Ecoli	Ec_PDS000003657.110	SRR25941722	CSP1_v_CSP2	-1.45455	1.67985	-2	-4.747	1.838	Inlier
Ecoli	Ec_PDS000003657.110	SRR25941722	NCBI_v_CSP1	3.39394	2.01939	4	-0.564	7.352	Inlier
Ecoli	Ec_PDS000003657.110	SRR25941722	NCBI_v_CSP2	1.93939	1.49023	2	-0.981	4.86	Inlier
Ecoli	Ec_PDS000003657.110	SRR25941776	CSP1_v_CSP2	-2.34343	1.61726	-3	-5.513	0.826	Inlier
Ecoli	Ec_PDS000003657.110	SRR25941776	NCBI_v_CSP1	3.38384	1.99339	4	-0.523	7.291	Inlier
Ecoli	Ec_PDS000003657.110	SRR25941776	NCBI_v_CSP2	1.0404	1.27711	1	-1.463	3.543	Inlier
Ecoli	Ec_PDS000003657.110	SRR25979017	CSP1_v_CSP2	-0.959596	1.76079	-1	-4.411	2.491	Inlier
Ecoli	Ec_PDS000003657.110	SRR25979017	NCBI_v_CSP1	1.88889	2.27178	1	-2.564	6.342	Inlier
Ecoli	Ec_PDS000003657.110	SRR25979017	NCBI_v_CSP2	0.929293	2.27342	0	-3.527	5.385	Inlier
Ecoli	Ec_PDS000003657.110	SRR26111775	CSP1_v_CSP2	-0.969697	1.76967	-1	-4.438	2.499	Inlier
Ecoli	Ec_PDS000003657.110	SRR26111775	NCBI_v_CSP1	0.949495	2.23321	0	-3.428	5.327	Inlier
Ecoli	Ec_PDS000003657.110	SRR26111775	NCBI_v_CSP2	-0.020202	2.26319	0	-4.456	4.416	Inlier
Ecoli	Ec_PDS000003657.110	SRR26279668	CSP1_v_CSP2	-1.38384	1.7997	-1	-4.911	2.144	Inlier
Ecoli	Ec_PDS000003657.110	SRR26279668	NCBI_v_CSP1	1.9899	2.0228	2	-1.975	5.955	Inlier
Ecoli	Ec_PDS000003657.110	SRR26279668	NCBI_v_CSP2	0.606061	1.87256	0	-3.064	4.276	Inlier
Ecoli	Ec_PDS000003657.110	SRR26363142	CSP1_v_CSP2	1.43434	1.53969	1	-1.583	4.452	Inlier
Ecoli	Ec_PDS000003657.110	SRR26363142	NCBI_v_CSP1	0.494949	1.8592	1	-3.149	4.139	Inlier
Ecoli	Ec_PDS000003657.110	SRR26363142	NCBI_v_CSP2	1.92929	1.36466	2	-0.745	4.604	Inlier
Ecoli	Ec_PDS000003657.110	SRR26584138	CSP1_v_CSP2	-0.313131	1.58852	0	-3.427	2.8	Inlier
Ecoli	Ec_PDS000003657.110	SRR26584138	NCBI_v_CSP1	1.14141	2.07025	1	-2.916	5.199	Inlier
Ecoli	Ec_PDS000003657.110	SRR26584138	NCBI_v_CSP2	0.828283	1.98998	0	-3.072	4.729	Inlier
Ecoli	Ec_PDS000003657.110	SRR26630598	CSP1_v_CSP2	-2.06061	1.71915	-2	-5.43	1.309	Inlier
Ecoli	Ec_PDS000003657.110	SRR26630598	NCBI_v_CSP1	1.15152	2.10618	1	-2.977	5.28	Inlier
Ecoli	Ec_PDS000003657.110	SRR26630598	NCBI_v_CSP2	-0.909091	2.26369	-1	-5.346	3.528	Inlier
Ecoli	Ec_PDS000003657.110	SRR26683318	CSP1_v_CSP2	-0.949495	1.76343	-1	-4.406	2.507	Inlier
Ecoli	Ec_PDS000003657.110	SRR26683318	NCBI_v_CSP1	0.969697	2.2563	1	-3.453	5.392	Inlier
Ecoli	Ec_PDS000003657.110	SRR26683318	NCBI_v_CSP2	0.020202	2.27668	0	-4.442	4.482	Inlier
Ecoli	Ec_PDS000003657.110	SRR26683319	CSP1_v_CSP2	-1.05051	1.69858	-1	-4.38	2.279	Inlier
Ecoli	Ec_PDS000003657.110	SRR26683319	NCBI_v_CSP1	1.09091	2.16696	1	-3.156	5.338	Inlier
Ecoli	Ec_PDS000003657.110	SRR26683319	NCBI_v_CSP2	0.040404	2.26292	0	-4.395	4.476	Inlier
Ecoli	Ec_PDS000003657.110	SRR26769233	CSP1_v_CSP2	-1.23232	1.67715	-1	-4.519	2.055	Inlier
Ecoli	Ec_PDS000003657.110	SRR26769233	NCBI_v_CSP1	1.74747	2.26483	1	-2.692	6.186	Inlier
Ecoli	Ec_PDS000003657.110	SRR26769233	NCBI_v_CSP2	0.515152	2.04722	0	-3.497	4.528	Inlier
Ecoli	Ec_PDS000003657.110	SRR3068697	CSP1_v_CSP2	-0.79798	1.28555	-1	-3.318	1.722	Inlier
Ecoli	Ec_PDS000003657.110	SRR3068697	NCBI_v_CSP1	2.50505	1.87559	3	-1.171	6.181	Inlier
Ecoli	Ec_PDS000003657.110	SRR3068697	NCBI_v_CSP2	1.70707	1.48635	2	-1.206	4.62	Inlier
Ecoli	Ec_PDS000003657.110	SRR3133002	CSP1_v_CSP2	-3.81818	1.59951	-4	-6.953	-0.683	Inlier
Ecoli	Ec_PDS000003657.110	SRR3133002	NCBI_v_CSP1	5.77778	2.01806	6	1.822	9.733	Inlier
Ecoli	Ec_PDS000003657.110	SRR3133002	NCBI_v_CSP2	1.9596	1.5709	2	-1.119	5.039	Inlier
Ecoli	Ec_PDS000003657.110	SRR3178040	CSP1_v_CSP2	-1.90909	1.57202	-2	-4.99	1.172	Inlier
Ecoli	Ec_PDS000003657.110	SRR3178040	NCBI_v_CSP1	6.42424	2.00556	7	2.493	10.355	Inlier
Ecoli	Ec_PDS000003657.110	SRR3178040	NCBI_v_CSP2	4.51515	2.07691	5	0.444	8.586	Inlier
Ecoli	Ec_PDS000003657.110	SRR3372184	CSP1_v_CSP2	-0.787879	1.67985	-1	-4.08	2.505	Inlier
Ecoli	Ec_PDS000003657.110	SRR3372184	NCBI_v_CSP1	1.63636	2.26082	1	-2.795	6.067	Inlier
Ecoli	Ec_PDS000003657.110	SRR3372184	NCBI_v_CSP2	0.848485	1.59312	1	-2.274	3.971	Inlier
Ecoli	Ec_PDS000003657.110	SRR3372215	CSP1_v_CSP2	-1.21212	1.18039	-1	-3.526	1.101	Inlier
Ecoli	Ec_PDS000003657.110	SRR3372215	NCBI_v_CSP1	1.72727	1.64638	2	-1.5	4.954	Inlier
Ecoli	Ec_PDS000003657.110	SRR3372215	NCBI_v_CSP2	0.515152	1.48711	0	-2.4	3.43	Inlier
Ecoli	Ec_PDS000003657.110	SRR3372216	CSP1_v_CSP2	-1.57576	1.45048	-2	-4.419	1.267	Inlier
Ecoli	Ec_PDS000003657.110	SRR3372216	NCBI_v_CSP1	2.64646	1.83677	3	-0.954	6.246	Inlier
Ecoli	Ec_PDS000003657.110	SRR3372216	NCBI_v_CSP2	1.07071	1.35716	1	-1.589	3.731	Inlier
Ecoli	Ec_PDS000003657.110	SRR3715684	CSP1_v_CSP2	-1.44444	1.5066	-2	-4.397	1.508	Inlier
Ecoli	Ec_PDS000003657.110	SRR3715684	NCBI_v_CSP1	2.52525	1.86997	3	-1.14	6.19	Inlier
Ecoli	Ec_PDS000003657.110	SRR3715684	NCBI_v_CSP2	1.08081	1.40463	1	-1.672	3.834	Inlier
Ecoli	Ec_PDS000003657.110	SRR3956995	CSP1_v_CSP2	-2.93939	1.64638	-3	-6.166	0.287	Inlier
Ecoli	Ec_PDS000003657.110	SRR3956995	NCBI_v_CSP1	1.58586	2.22238	1	-2.77	5.942	Inlier
Ecoli	Ec_PDS000003657.110	SRR3956995	NCBI_v_CSP2	-1.35354	1.70422	-2	-4.694	1.987	Inlier
Ecoli	Ec_PDS000003657.110	SRR4101451	CSP1_v_CSP2	-1.33333	1.3248	-1	-3.93	1.263	Inlier
Ecoli	Ec_PDS000003657.110	SRR4101451	NCBI_v_CSP1	6.59596	1.88939	7	2.893	10.299	Inlier
Ecoli	Ec_PDS000003657.110	SRR4101451	NCBI_v_CSP2	5.26263	1.93035	5	1.479	9.046	Inlier
Ecoli	Ec_PDS000003657.110	SRR4113412	CSP1_v_CSP2	-1.91919	1.39735	-2	-4.658	0.82	Inlier
Ecoli	Ec_PDS000003657.110	SRR4113412	NCBI_v_CSP1	2.78788	1.73366	2	-0.61	6.186	Inlier
Ecoli	Ec_PDS000003657.110	SRR4113412	NCBI_v_CSP2	0.868687	1.71218	1	-2.487	4.224	Inlier
Ecoli	Ec_PDS000003657.110	SRR5054499	CSP1_v_CSP2	-2.0404	1.51805	-2	-5.016	0.935	Inlier
Ecoli	Ec_PDS000003657.110	SRR5054499	NCBI_v_CSP1	2.71717	2.12872	2	-1.455	6.889	Inlier
Ecoli	Ec_PDS000003657.110	SRR5054499	NCBI_v_CSP2	0.676768	1.58969	1	-2.439	3.792	Inlier
Ecoli	Ec_PDS000003657.110	SRR5395840	CSP1_v_CSP2	-3.48485	1.66821	-4	-6.754	-0.215	Inlier
Ecoli	Ec_PDS000003657.110	SRR5395840	NCBI_v_CSP1	4.43434	1.94392	5	0.624	8.244	Inlier
Ecoli	Ec_PDS000003657.110	SRR5395840	NCBI_v_CSP2	0.949495	1.32768	1	-1.653	3.552	Inlier
Ecoli	Ec_PDS000003657.110	SRR5995970	CSP1_v_CSP2	-0.565657	1.7966	-1	-4.087	2.956	Inlier
Ecoli	Ec_PDS000003657.110	SRR5995970	NCBI_v_CSP1	2.0202	1.91119	2	-1.726	5.766	Inlier
Ecoli	Ec_PDS000003657.110	SRR5995970	NCBI_v_CSP2	1.45455	1.35731	1	-1.206	4.115	Inlier
Ecoli	Ec_PDS000003657.110	SRR6060995	CSP1_v_CSP2	-1.14141	1.60363	-1	-4.284	2.002	Inlier
Ecoli	Ec_PDS000003657.110	SRR6060995	NCBI_v_CSP1	5.22222	2.01806	5	1.267	9.178	Inlier
Ecoli	Ec_PDS000003657.110	SRR6060995	NCBI_v_CSP2	4.08081	1.39003	4	1.356	6.805	Inlier
Ecoli	Ec_PDS000003657.110	SRR6128604	CSP1_v_CSP2	0.010101	1.49485	0	-2.92	2.94	Inlier
Ecoli	Ec_PDS000003657.110	SRR6128604	NCBI_v_CSP1	1.17172	2.16673	1	-3.075	5.418	Inlier
Ecoli	Ec_PDS000003657.110	SRR6128604	NCBI_v_CSP2	1.18182	1.88638	1	-2.515	4.879	Inlier
Ecoli	Ec_PDS000003657.110	SRR6129480	CSP1_v_CSP2	-1.82828	1.58462	-2	-4.934	1.278	Inlier
Ecoli	Ec_PDS000003657.110	SRR6129480	NCBI_v_CSP1	6.9596	1.68377	7	3.659	10.26	Inlier
Ecoli	Ec_PDS000003657.110	SRR6129480	NCBI_v_CSP2	5.13131	1.87163	5	1.463	8.8	Inlier
Ecoli	Ec_PDS000003657.110	SRR6293218	CSP1_v_CSP2	-2.26263	1.42561	-2	-5.057	0.532	Inlier
Ecoli	Ec_PDS000003657.110	SRR6293218	NCBI_v_CSP1	2.72727	1.878	3	-0.954	6.408	Inlier
Ecoli	Ec_PDS000003657.110	SRR6293218	NCBI_v_CSP2	0.464646	1.40925	0	-2.297	3.227	Inlier
Ecoli	Ec_PDS000003657.110	SRR6396316	CSP1_v_CSP2	-1.52525	1.46624	-2	-4.399	1.349	Inlier
Ecoli	Ec_PDS000003657.110	SRR6396316	NCBI_v_CSP1	3.50505	1.9607	4	-0.338	7.348	Inlier
Ecoli	Ec_PDS000003657.110	SRR6396316	NCBI_v_CSP2	1.9798	2.157	2	-2.248	6.207	Inlier
Ecoli	Ec_PDS000003657.110	SRR6927266	CSP1_v_CSP2	-0.828283	1.77304	-1	-4.303	2.647	Inlier
Ecoli	Ec_PDS000003657.110	SRR6927266	NCBI_v_CSP1	5.34343	2.29979	5	0.836	9.851	Inlier
Ecoli	Ec_PDS000003657.110	SRR6927266	NCBI_v_CSP2	4.51515	1.83705	4	0.915	8.116	Inlier
Ecoli	Ec_PDS000003657.110	SRR7465148	CSP1_v_CSP2	-0.939394	1.52408	-1	-3.927	2.048	Inlier
Ecoli	Ec_PDS000003657.110	SRR7465148	NCBI_v_CSP1	3.76768	2.08409	3	-0.317	7.852	Inlier
Ecoli	Ec_PDS000003657.110	SRR7465148	NCBI_v_CSP2	2.82828	1.77304	3	-0.647	6.303	Inlier
Ecoli	Ec_PDS000003657.110	SRR7547319	CSP1_v_CSP2	-1.46465	1.6119	-2	-4.624	1.695	Inlier
Ecoli	Ec_PDS000003657.110	SRR7547319	NCBI_v_CSP1	3.14141	2.19001	3	-1.151	7.434	Inlier
Ecoli	Ec_PDS000003657.110	SRR7547319	NCBI_v_CSP2	1.67677	1.634	2	-1.526	4.879	Inlier
Ecoli	Ec_PDS000003657.110	SRR7641444	CSP1_v_CSP2	-0.959596	1.42083	-1	-3.744	1.825	Inlier
Ecoli	Ec_PDS000003657.110	SRR7641444	NCBI_v_CSP1	4.42424	1.94354	5	0.615	8.234	Inlier
Ecoli	Ec_PDS000003657.110	SRR7641444	NCBI_v_CSP2	3.46465	1.66177	3	0.208	6.722	Inlier
Ecoli	Ec_PDS000003657.110	SRR7825905	CSP1_v_CSP2	0.343434	1.72119	0	-3.03	3.717	Inlier
Ecoli	Ec_PDS000003657.110	SRR7825905	NCBI_v_CSP1	0.484848	2.26492	0	-3.954	4.924	Inlier
Ecoli	Ec_PDS000003657.110	SRR7825905	NCBI_v_CSP2	0.828283	1.73817	1	-2.578	4.235	Inlier
Ecoli	Ec_PDS000003657.110	SRR8030153	CSP1_v_CSP2	0.434343	1.37886	0	-2.268	3.137	Inlier
Ecoli	Ec_PDS000003657.110	SRR8030153	NCBI_v_CSP1	4.44444	1.66122	4	1.189	7.7	Inlier
Ecoli	Ec_PDS000003657.110	SRR8030153	NCBI_v_CSP2	4.87879	1.59893	5	1.745	8.013	Inlier
Ecoli	Ec_PDS000003657.110	SRR8192125	CSP1_v_CSP2	-1.11111	1.64682	-1	-4.339	2.117	Inlier
Ecoli	Ec_PDS000003657.110	SRR8192125	NCBI_v_CSP1	2.17172	1.92746	2	-1.606	5.949	Inlier
Ecoli	Ec_PDS000003657.110	SRR8192125	NCBI_v_CSP2	1.06061	1.49023	1	-1.86	3.981	Inlier
Ecoli	Ec_PDS000003657.110	SRR8192150	CSP1_v_CSP2	-0.878788	1.52712	-1	-3.872	2.114	Inlier
Ecoli	Ec_PDS000003657.110	SRR8192150	NCBI_v_CSP1	2.05051	1.9968	2	-1.863	5.964	Inlier
Ecoli	Ec_PDS000003657.110	SRR8192150	NCBI_v_CSP2	1.17172	1.4217	1	-1.615	3.958	Inlier
Ecoli	Ec_PDS000003657.110	SRR8385441	CSP1_v_CSP2	-1.38384	1.5499	-1	-4.422	1.654	Inlier
Ecoli	Ec_PDS000003657.110	SRR8385441	NCBI_v_CSP1	3.39394	1.82845	4	-0.19	6.978	Inlier
Ecoli	Ec_PDS000003657.110	SRR8385441	NCBI_v_CSP2	2.0101	1.6812	2	-1.285	5.305	Inlier
[truncated: 34,752 more rows]
